# Supplementary material
Source: Royal Society of Chemistry journal article supplement (doi:10.1039/d6ob00213g)
Supplement: d6ob00213g1.pdf [file d6ob00213g1.pdf]

## Supporting Information

### Efficient Synthesis of Quinoline-Enone Esters via Copper-Catalyzed Coupling with Electron-Deficient Alkynes and Exploration of Fluorescence in Difluoroboron Complexes

Xiaojiao Wang, Xin Cao, Zhenjiang Li, Jialin Qi,\* and Shuwen Gong\*

|                                                                                                         |            |
|---------------------------------------------------------------------------------------------------------|------------|
| <b>Content</b> .....                                                                                    | <b>1</b>   |
| <b>1. General information</b> .....                                                                     | <b>2</b>   |
| <b>2. Preparation of starting materials</b> .....                                                       | <b>2</b>   |
| <b>3. Optimization of reaction conditions</b> .....                                                     | <b>2</b>   |
| <b>4. Preparation and characterization of compounds 3 and 5</b> .....                                   | <b>3</b>   |
| 4.1. Preparation and characterization of 3 or 3' .....                                                  | 3          |
| 4.2. Preparation and characterization of 5 .....                                                        | 17         |
| <b>5. Synthetic applications</b> .....                                                                  | <b>22</b>  |
| 5.1. Synthesis of 6 .....                                                                               | 22         |
| 5.2. Synthesis of 7 .....                                                                               | 22         |
| 5.3. Synthesis of 8a .....                                                                              | 23         |
| 5.4. Synthesis of 9 .....                                                                               | 24         |
| 5.5. Synthesis of 10 .....                                                                              | 24         |
| 5.6. Synthesis of 11 .....                                                                              | 27         |
| <b>6. Gram scale experiments</b> .....                                                                  | <b>29</b>  |
| <b>7. Reference</b> .....                                                                               | <b>29</b>  |
| <b>8. X-ray crystallography</b> .....                                                                   | <b>30</b>  |
| <b>9. NMR and HRMS spectra of all compounds</b> .....                                                   | <b>31</b>  |
| <b>10. UV-Vis absorption and Fluorescence emission spectra and Photophysical<br/>Measurements</b> ..... | <b>178</b> |

## 1. General information

All reactions were carried out under an atmosphere of N<sub>2</sub> unless otherwise noted. All the reactions were monitored by thin layer chromatography (TLC), carried out on 0.25 mm silica gel plates using UV light as visualizing agent. Column chromatography was carried out on silica gel (particle size 100-200 mesh). Unless otherwise stated, all yields refer to isolated products following purification by flash column chromatography. NMR spectra were acquired on a Bruker Avance III HD 500 spectrometer operating at 500 or 600 MHz. All <sup>1</sup>H, <sup>13</sup>C, <sup>11</sup>B, <sup>19</sup>F NMR spectra were recorded using CDCl<sub>3</sub> as solvent. Tetramethylsilane (TMS) signals or residual solvent signals were used [TMS δ=0.00 (<sup>1</sup>H NMR), CDCl<sub>3</sub>=7.26 ppm (<sup>1</sup>H NMR), 77.16 ppm (<sup>13</sup>C NMR)] as internal standards. The following abbreviations were used to describe peak splitting patterns when appropriate: s = singlet, d = doublet, t = triplet, q = quartet, m = multiplet. High-resolution mass spectrometry (HRMS) data were acquired on an Agilent 6545 Q-TOF LC/MS instrument.

## 2. Preparation of starting materials

**1** was prepared according to reported procedures. [1]

**2** and **4** was prepared according to reported procedures. [2]

## 3. Optimization of reaction conditions

Table S1. Optimization of the coupling reaction between quinoline N-oxides and alkynyl imines. [a]

The reaction scheme shows the coupling of quinoline N-oxide **1a** and alkynyl imine **2a** to form products **3a** and **3a'**. The reaction conditions are: Catalyst, solvent, rt, 5Å MS, 5 min. The structures of **1a**, **2a**, **3a**, and **3a'** are shown. **1a** is a quinoline ring with an N-oxide group. **2a** is an alkynyl imine with a phenyl group, a Boc group, and an ethyl ester group. **3a** is a quinoline ring with an N-oxide group, a phenyl group, a Boc group, and an ethyl ester group. **3a'** is a quinoline ring with an N-oxide group, a phenyl group, a Boc group, and an ethyl ester group, with a hydroxyl group on the quinoline ring.

| entry | Catalyst                                            | [Cat] % | solvent | Yield (%) [b] | rr (3a/3a') [c] |
|-------|-----------------------------------------------------|---------|---------|---------------|-----------------|
| 1     | -                                                   | -       | DCE     | 55            | 15/1            |
| 2     | CuDPP                                               | 10      | DCE     | 93            | 25/1            |
| 3     | Cu(CH <sub>3</sub> CN) <sub>4</sub> BF <sub>4</sub> | 10      | DCE     | 87            | 23/1            |
| 4     | CuTc                                                | 10      | DCE     | 80            | 24/1            |
| 5     | Cu(OTf) <sub>2</sub>                                | 10      | DCE     | 80            | 23/1            |
| 6     | Cu(OAc) <sub>2</sub>                                | 10      | DCE     | 70            | 19/1            |
| 7     | Cu(CH <sub>3</sub> CN) <sub>4</sub> PF <sub>6</sub> | 10      | DCE     | 99            | 25/1            |

|    |                                                |   |                 |    |      |
|----|------------------------------------------------|---|-----------------|----|------|
| 8  | $\text{Cu}(\text{CH}_3\text{CN})_4\text{PF}_6$ | 5 | DCE             | 99 | 25/1 |
| 9  | $\text{Cu}(\text{CH}_3\text{CN})_4\text{PF}_6$ | 1 | DCE             | 80 | 25/1 |
| 10 | $\text{Cu}(\text{CH}_3\text{CN})_4\text{PF}_6$ | 5 | DCM             | 73 | 23/1 |
| 11 | $\text{Cu}(\text{CH}_3\text{CN})_4\text{PF}_6$ | 5 | $\text{CHCl}_3$ | 76 | 22/1 |
| 12 | $\text{Cu}(\text{CH}_3\text{CN})_4\text{PF}_6$ | 5 | MeCN            | 62 | 17/1 |
| 13 | $\text{Cu}(\text{CH}_3\text{CN})_4\text{PF}_6$ | 5 | toluene         | 71 | 19/1 |
| 14 | $\text{Cu}(\text{CH}_3\text{CN})_4\text{PF}_6$ | 5 | THF             | 73 | 16/1 |
| 15 | $\text{Cu}(\text{CH}_3\text{CN})_4\text{PF}_6$ | 5 | MTBE            | 72 | 18/1 |
| 16 | $\text{Cu}(\text{CH}_3\text{CN})_4\text{PF}_6$ | 5 | EtOAc           | 56 | 15/1 |

<sup>[a]</sup> Reaction conditions: A mixture of 1a (0.24 mmol), 2a (0.2 mmol), [Cat] (x mmol%), solvent (2 mL) and 5Å MS (100 mg) at room temperature for 5 min. <sup>[b]</sup> Isolated yields. <sup>[c]</sup> Regioisomeric ratio (rr) was determined by <sup>1</sup>H NMR analysis of the crude reaction mixtures.

Table S2. Optimization of the coupling reaction between quinoline N-oxides and ynones. <sup>[a]</sup>

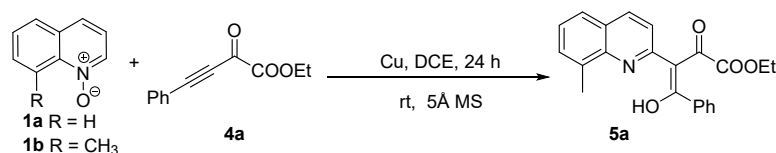

| entry | 1a or 1b | Catalyst                                       | Yield (%) <sup>[b]</sup> |
|-------|----------|------------------------------------------------|--------------------------|
| 1     | 1a       | $\text{Cu}(\text{CH}_3\text{CN})_4\text{PF}_6$ | n.d.                     |
| 2     | 1b       | $\text{Cu}(\text{CH}_3\text{CN})_4\text{PF}_6$ | 49                       |
| 3     | 1b       | CuDPP                                          | 61                       |
| 4     | 1b       | $\text{CuSO}_4$                                | 60                       |
| 5     | 1b       | $\text{Cu}(\text{ClO}_4)_2$                    | 50                       |
| 6     | 1b       | $\text{Cu}(\text{acac})_2$                     | 54                       |
| 7     | 1b       | CuTc                                           | 74                       |
| 8     | 1b       | $\text{Cu}(\text{OTf})_2$                      | 53                       |
| 9     | 1b       | $\text{Cu}(\text{OAc})_2$                      | 96                       |

<sup>[a]</sup> Reaction conditions: A mixture of 1a or 1b (0.24 mmol), 4a (0.2 mmol), [Cat] (5 mmol%), DCE (2 mL) and 5Å MS (100 mg) at room temperature. <sup>[b]</sup> Isolated yields.

## 4. Preparation and characterization of compounds 3 and 5

### 4.1. Preparation and characterization of 3 or 3'

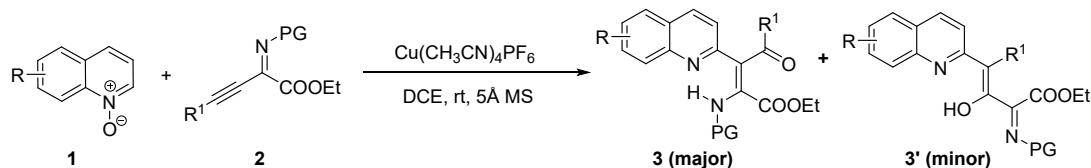

A mixture of quinoline N-oxides 1 (0.24 mmol), alkynyl imines 2 (0.20 mmol),

Cu(CH<sub>3</sub>CN)<sub>4</sub>PF<sub>6</sub> (0.01 mmol, 5 mol%) and 5Å molecular sieves (100 mg) in anhydrous DCE (2 mL) was stirred at room temperature for 5 minutes. Upon completion (as monitored by TLC), the reaction mixture was filtered, concentrated under reduced pressure, and purified by column chromatography on silica gel (eluent: petroleum ether/ethyl acetate = 10:1 to 3:1) to afford the desired products **3** or **3'**.

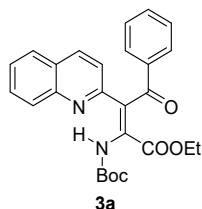

**3a**, yellow solid, m.p. 104.5-105.5 °C, 99% yield, 25/1 rr, <sup>1</sup>H NMR (500 MHz, CDCl<sub>3</sub>) δ (ppm) 12.95 (s, 1H), 8.00-7.94 (m, 4H), 7.75-7.71 (m, 2H), 7.54-7.50 (m, 2H), 7.40 (t, *J*=7.7Hz, 2H), 7.18 (d, *J*=8.8Hz, 1H), 4.02 (q, *J*=7.2Hz, 2H), 1.55 (s, 9H), 1.07 (t, *J*=7.2Hz, 3H). <sup>13</sup>C NMR (126 MHz, CDCl<sub>3</sub>) δ (ppm) 195.24, 163.69, 154.65, 152.20, 146.26, 137.99, 137.61, 136.73, 133.58, 130.39, 129.87, 128.62, 128.28, 127.59, 127.09, 126.38, 121.40, 118.54, 81.69, 61.88, 28.20, 13.44. HRMS (ESI, m/z) calcd for C<sub>26</sub>H<sub>26</sub>N<sub>2</sub>O<sub>5</sub> [M+H]<sup>+</sup> 447.1915, found 447.1920.

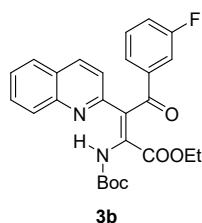

**3b**, yellow solid, m.p. 99.8-100.8 °C, 78% yield, 25/1 rr, <sup>1</sup>H NMR (500 MHz, CDCl<sub>3</sub>) δ (ppm) 12.92 (s, 1H), 8.01-7.98 (m, 2H), 7.77-7.73 (m, 3H), 7.68 (dt, *J*=9.0Hz, 2.5Hz, 1H), 7.56-7.53 (m, 1H), 7.39-7.35 (m, 1H), 7.24 (td, *J*=8.0Hz, 3.0Hz, 1H), 7.14 (d, *J*=8.5Hz, 1H), 4.07 (q, *J*=7.0Hz, 2H), 1.55 (s, 9H), 1.11 (t, *J*=7.0Hz, 3H). <sup>13</sup>C NMR (126 MHz, CDCl<sub>3</sub>) δ (ppm) 194.10 (d, *J*=2.3Hz), 163.7230, 162.87 (d, *J*=240.6Hz), 154.43, 152.19, 146.35, 140.21 (d, *J*=6.3Hz), 138.15, 136.89, 130.55, 130.39 (d, *J*=7.7Hz), 128.38, 127.66, 127.24, 126.47, 125.89 (d, *J*=2.9Hz), 121.33, 120.64 (d, *J*=21.5Hz), 118.08, 116.19 (d, *J*=22.4Hz), 81.92, 62.08, 28.25, 13.54. <sup>19</sup>F NMR (471 MHz, CDCl<sub>3</sub>) δ (ppm) -111.66. HRMS (ESI, m/z) calcd for C<sub>26</sub>H<sub>25</sub>FN<sub>2</sub>O<sub>5</sub> [M+Na]<sup>+</sup> 487.1640, found 487.1645.

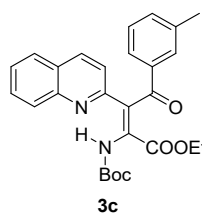

**3c**, yellow solid, m.p. 114.3-115.3 °C, 98% yield, 30/1 rr, <sup>1</sup>H NMR (500 MHz, CDCl<sub>3</sub>)

$\delta$  (ppm) 12.96 (s, 1H), 8.01 (d,  $J=8.5\text{Hz}$ , 1H), 7.98 (d,  $J=8.8\text{Hz}$ , 1H), 7.81 (s, 1H), 7.77-7.73 (m, 3H), 7.54 (t,  $J=8.0\text{Hz}$ , 1H), 7.36-7.34 (m, 1H), 7.30-7.27 (m, 1H), 7.21 (d,  $J=8.8\text{Hz}$ , 1H), 4.02 (q,  $J=7.1\text{Hz}$ , 2H), 2.36 (s, 3H), 1.55 (s, 9H), 1.09 (t,  $J=7.2\text{Hz}$ , 3H).  $^{13}\text{C}$  NMR (126 MHz,  $\text{CDCl}_3$ )  $\delta$  (ppm) 195.53, 163.82, 154.84, 152.30, 146.36, 138.55, 138.07, 137.59, 136.77, 134.50, 130.42, 130.22, 128.59, 128.43, 127.64, 127.42, 127.11, 126.49, 121.55, 118.79, 81.75, 61.96, 28.29, 21.39, 13.54. HRMS (ESI,  $m/z$ ) calcd for  $\text{C}_{27}\text{H}_{28}\text{N}_2\text{O}_5$   $[\text{M}+\text{Na}]^+$  483.1891, found 483.1903.

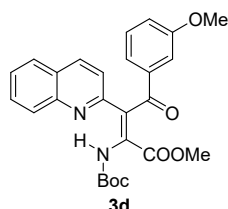

**3d**, yellow solid, m.p. 122.7-123.7 °C, 75% yield, 25/1 rr,  $^1\text{H}$  NMR (500 MHz,  $\text{CDCl}_3$ )  $\delta$  (ppm) 12.97 (s, 1H), 8.00 (d,  $J=8.4\text{Hz}$ , 1H), 7.97 (d,  $J=8.8\text{Hz}$ , 1H), 7.76-7.73 (m, 2H), 7.55-7.52 (m, 2H), 7.49 (d,  $J=7.6\text{Hz}$ , 1H), 7.29-7.26 (m, 1H), 7.18 (d,  $J=8.8\text{Hz}$ , 1H), 7.10-7.07 (m, 1H), 3.82 (s, 3H), 3.59 (s, 3H), 1.55 (s, 9H).  $^{13}\text{C}$  NMR (126 MHz,  $\text{CDCl}_3$ )  $\delta$  (ppm) 195.07, 164.30, 159.93, 154.79, 152.24, 146.29, 139.28, 137.74, 136.75, 130.44, 129.70, 128.40, 127.63, 127.17, 126.47, 123.09, 121.62, 120.49, 118.49, 113.25, 81.91, 55.57, 52.58, 28.27. HRMS (ESI,  $m/z$ ) calcd for  $\text{C}_{26}\text{H}_{26}\text{N}_2\text{O}_6$   $[\text{M}+\text{Na}]^+$  485.1684, found 485.1689.

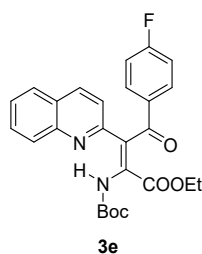

**3e**, yellow oil, 83% yield, 30/1 rr,  $^1\text{H}$  NMR (500 MHz,  $\text{CDCl}_3$ )  $\delta$  (ppm) 12.90 (s, 1H), 8.02-7.98 (m, 4H), 7.77-7.74 (m, 2H), 7.54 (t,  $J=7.6\text{Hz}$ , 1H), 7.16 (d,  $J=8.8\text{Hz}$ ), 7.08 (t,  $J=8.5\text{Hz}$ , 2H), 4.06 (q,  $J=7.1\text{Hz}$ , 2H), 1.55 (s, 9H), 1.11 (t,  $J=7.2\text{Hz}$ , 3H).  $^{13}\text{C}$  NMR (126 MHz,  $\text{CDCl}_3$ )  $\delta$  (ppm) 193.71, 166.02 (d,  $J=255.8\text{Hz}$ ), 163.68, 154.46, 152.15, 146.29, 137.64, 136.78, 134.46 (d,  $J=2.8\text{Hz}$ ), 132.50 (d,  $J=9.4\text{Hz}$ ), 130.43, 128.31, 127.56, 127.12, 126.37, 121.26, 118.12, 115.77 (d,  $J=21.8\text{Hz}$ ), 81.77, 61.96, 28.17, 13.47.  $^{19}\text{F}$  NMR (471 MHz,  $\text{CDCl}_3$ )  $\delta$  (ppm) -104.08. HRMS (ESI,  $m/z$ ) calcd for  $\text{C}_{26}\text{H}_{25}\text{FN}_2\text{O}_5$   $[\text{M}+\text{Na}]^+$  487.1640, found 487.1655.

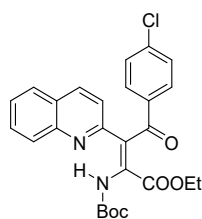

**3f**

**3f**, yellow solid, m.p. 117.3-118.3 °C, 70% yield, 25/1 rr,  $^1\text{H}$  NMR (500 MHz,  $\text{CDCl}_3$ )  $\delta$  (ppm) 12.90 (s, 1H), 7.99 (t,  $J=7.0\text{Hz}$ , 2H), 7.92 (d,  $J=8.5\text{Hz}$ , 2H), 7.77-7.74 (m, 2H), 7.54 (t,  $J=7.5\text{Hz}$ , 1H), 7.38 (d,  $J=8.6\text{Hz}$ , 2H), 7.13 (d,  $J=8.8\text{Hz}$ , 1H), 4.07 (q,  $J=7.2\text{Hz}$ , 2H), 1.55 (s, 9H), 1.12 (t,  $J=7.2\text{Hz}$ , 3H).  $^{13}\text{C}$  NMR (126 MHz,  $\text{CDCl}_3$ )  $\delta$  (ppm) 194.17, 163.75, 154.50, 152.21, 146.39, 140.14, 138.01, 136.90, 136.50, 131.31, 130.55, 129.06, 128.41, 127.67, 127.24, 126.47, 121.37, 118.06, 81.92, 62.11, 28.27, 13.59. HRMS (ESI, m/z) calcd for  $\text{C}_{26}\text{H}_{25}\text{ClN}_2\text{O}_5$   $[\text{M}+\text{Na}]^+$  503.1345, found 503.1364.

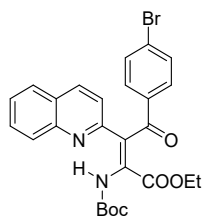

**3g**

**3g**, yellow solid, m.p. 120.3-121.3 °C, 73% yield, 30/1 rr,  $^1\text{H}$  NMR (500 MHz,  $\text{CDCl}_3$ )  $\delta$  (ppm) 12.90 (s, 1H), 7.99 (t,  $J=6.7\text{Hz}$ , 2H), 7.84 (d,  $J=8.3\text{Hz}$ , 2H), 7.77-7.74 (m, 2H), 7.56-7.53 (m, 3H), 7.12 (d,  $J=8.8\text{Hz}$ , 1H), 4.07 (q,  $J=7.2\text{Hz}$ , 2H), 1.55 (s, 9H), 1.12 (t,  $J=7.2\text{Hz}$ , 3H).  $^{13}\text{C}$  NMR (151 MHz,  $\text{CDCl}_3$ )  $\delta$  194.37, 163.75, 154.47, 152.19, 146.36, 138.06, 136.90, 136.88, 132.05, 131.38, 130.56, 128.93, 128.39, 127.67, 127.25, 126.46, 121.37, 117.98, 81.93, 62.12, 28.26, 13.59. HRMS (ESI, m/z) calcd for  $\text{C}_{26}\text{H}_{25}\text{BrN}_2\text{O}_5$   $[\text{M}+\text{H}]^+$  525.1020, found 525.1025.

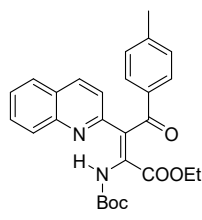

**3h**

**3h**, yellow solid, m.p. 123.7-124.5 °C, 97% yield, 22/1 rr,  $^1\text{H}$  NMR (500 MHz,  $\text{CDCl}_3$ )  $\delta$  (ppm) 12.93 (s, 1H), 8.00 (d,  $J=8.4\text{Hz}$ , 1H), 7.96 (d,  $J=8.8\text{Hz}$ , 1H), 7.88 (d,  $J=8.2\text{Hz}$ , 2H), 7.76-7.72 (m, 2H), 7.54-7.50 (m, 1H), 7.21-7.18 (m, 3H), 4.03 (q,  $J=7.2\text{Hz}$ , 2H), 2.37 (s, 3H), 1.55 (s, 9H), 1.09 (t,  $J=7.2\text{Hz}$ , 3H).  $^{13}\text{C}$  NMR (126 MHz,  $\text{CDCl}_3$ )  $\delta$  (ppm) 194.90, 163.75, 154.81, 152.27, 146.31, 144.63, 137.30, 136.71, 135.57, 130.37, 130.08, 129.38, 128.36, 127.60, 127.07, 126.42, 121.49, 118.76, 81.66, 61.90, 28.25, 21.80, 13.50. HRMS (ESI, m/z) calcd for  $\text{C}_{27}\text{H}_{28}\text{N}_2\text{O}_5$   $[\text{M}+\text{H}]^+$  461.2071, found

461.2082.

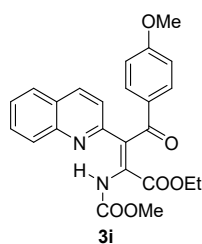

**3i**, yellow solid, m.p. 143.7-144.7 °C, 65% yield, 75/1 rr, <sup>1</sup>H NMR (500 MHz, CDCl<sub>3</sub>) δ (ppm) 13.18 (s, 1H), 8.06 (d, *J*=9.3Hz, 1H), 8.00-7.95 (m, 3H), 7.77-7.73 (m, 2H), 7.55-7.52 (m, 1H), 7.21 (d, *J*=8.7Hz, 1H), 6.89 (d, *J*=9.0Hz, 1H), 4.06 (q, *J*=7.2Hz, 2H), 3.84(s, 3H), 3.84 (s, 3H), 1.10 (t, *J*=7.2Hz, 3H). <sup>13</sup>C NMR (126 MHz, CDCl<sub>3</sub>) δ (ppm) 187.15, 163.65, 154.50, 152.21, 146.35, 145.41, 137.57, 136.87, 135.55, 135.44, 130.43, 128.42, 128.25, 127.65, 127.17, 126.55, 121.31, 118.37, 81.84, 62.14, 28.26, 13.59. HRMS (ESI, m/z) calcd for C<sub>24</sub>H<sub>22</sub>N<sub>2</sub>O<sub>6</sub> [M+Na]<sup>+</sup> 457.1371, found 457.1380.

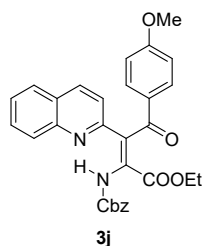

**3j**, yellow solid, m.p. 149.7-150.7 °C, 71% yield, 50/1 rr, <sup>1</sup>H NMR (500 MHz, CDCl<sub>3</sub>) δ (ppm) 13.24 (s, 1H), 8.01-7.96 (m, 4H), 7.74-7.71 (m, 2H), 7.53 (t, *J*=7.4Hz, 1H), 7.46-7.44 (m, 2H), 7.41-7.33 (m, 3H), 7.22 (d, *J*=8.8Hz, 1H), 6.89 (d, *J*=8.7Hz, 2H), 5.28 (s, 2H), 4.02 (q, *J*=7.2Hz, 2H), 3.83 (s, 3H), 1.08 (t, *J*=7.2Hz, 3H). <sup>13</sup>C NMR (126 MHz, CDCl<sub>3</sub>) δ (ppm) 193.50, 164.17, 163.50, 154.60, 153.45, 146.25, 136.93, 136.32, 135.94, 132.34, 130.91, 130.46, 128.65, 128.40, 128.38, 128.19, 127.59, 127.22, 126.51, 121.47, 119.87, 113.97, 67.75, 62.05, 55.59, 13.49. HRMS (ESI, m/z) calcd for C<sub>30</sub>H<sub>26</sub>N<sub>2</sub>O<sub>6</sub> [M+Na]<sup>+</sup> 533.1684, found 533.1696.

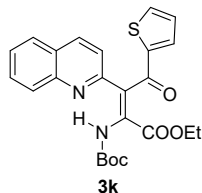

**3k**, yellow solid, m.p. 106.5-107.5 °C, 70% yield, 20/1 rr, <sup>1</sup>H NMR (500 MHz, CDCl<sub>3</sub>) δ (ppm) 12.93 (s, 1H), 8.04-7.99 (m, 2H), 7.77-7.74 (m, 2H), 7.68 (d, *J*=4.9Hz, 1H), 7.61 (d, *J*=4.1Hz, 1H), 7.54 (t, *J*=7.5Hz, 1H), 7.39 (d, *J*=8.8Hz, 1H), 7.03 (t, *J*=4.5Hz, 1H), 4.08 (q, *J*=7.2Hz, 2H), 1.54 (s, 9H), 1.15 (t, *J*=7.2Hz, 3H). <sup>13</sup>C NMR (126 MHz, CDCl<sub>3</sub>) δ (ppm) 187.05, 163.55, 154.40, 152.10, 146.24, 145.31, 137.47, 136.77, 135.45, 135.34, 130.33, 128.31, 128.14, 127.55, 127.06, 126.45, 121.20, 118.27, 81.74, 62.03, 28.16, 13.49. HRMS (ESI, m/z) calcd for C<sub>24</sub>H<sub>24</sub>N<sub>2</sub>O<sub>5</sub>S [M+H]<sup>+</sup>

453.1479, found 453.1487.

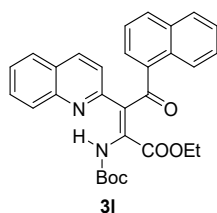

**3l**, yellow solid, m.p. 122.9-123.8 °C, 94% yield, 36/1 rr, <sup>1</sup>H NMR (500 MHz, CDCl<sub>3</sub>) δ (ppm) 13.07 (s, 1H), 8.44 (s, 1H), 8.12-8.10 (m, 1H), 8.03 (d, *J*=8.5Hz, 1H), 7.94 (d, *J*=8.8Hz, 1H), 7.88-7.83 (m, 3H), 7.77-7.71 (m, 2H), 7.58-7.47 (m, 3H), 7.25 (d, *J*=4.4Hz, 1H), 3.95 (q, *J*=7.2Hz, 2H), 1.57 (s, 9H), 0.97 (t, *J*=7.2Hz, 3H). <sup>13</sup>C NMR (126 MHz, CDCl<sub>3</sub>) δ (ppm) 195.25, 163.81, 154.87, 152.28, 146.33, 137.85, 136.81, 135.90, 135.49, 132.4997, 130.44, 129.88, 128.87, 128.70, 128.36, 127.85, 127.64, 127.12, 126.86, 126.46, 124.76, 121.52, 118.59, 81.79, 61.94, 28.27, 13.43. HRMS (ESI, m/z) calcd for C<sub>30</sub>H<sub>28</sub>N<sub>2</sub>O<sub>5</sub> [M+H]<sup>+</sup> 497.2071, found 497.2076.

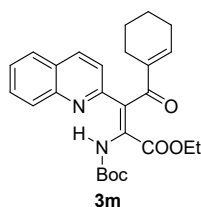

**3m**, yellow solid, m.p. 93.1-94.1 °C, 58% yield, 50/1 rr, <sup>1</sup>H NMR (500 MHz, CDCl<sub>3</sub>) δ (ppm) 12.82 (s, 1H), 8.06 (d, *J*=8.8Hz, 1H), 7.96 (d, *J*=8.5Hz, 1H), 7.77-7.71 (m, 2H), 7.52 (t, *J*=7.5Hz, 1H), 7.37 (d, *J*=6.6Hz, 1H), 6.87 (t, *J*=4.1Hz, 1H), 4.23 (q, *J*=7.2Hz, 2H), 2.40-2.37 (m, 2H), 2.18-2.14 (m, 2H), 1.69-1.56 (m, 4H), 1.52 (s, 9H), 1.31 (t, *J*=7.1Hz, 3H). <sup>13</sup>C NMR (126 MHz, CDCl<sub>3</sub>) δ (ppm) 196.08, 164.16, 155.01, 152.37, 146.31, 145.74, 141.15, 136.75, 136.39, 130.26, 128.39, 127.58, 127.01, 126.54, 121.16, 119.21, 81.50, 61.93, 28.25, 26.35, 23.25, 21.96, 21.68, 13.98. HRMS (ESI, m/z) calcd for C<sub>26</sub>H<sub>30</sub>N<sub>2</sub>O<sub>5</sub> [M+Na]<sup>+</sup> 473.2047, found 473.2050.

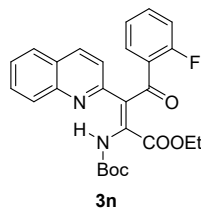

**3n**, yellow solid, m.p. 115.6-117.1 °C, 96% yield, 5/1 rr, <sup>1</sup>H NMR (500 MHz, CDCl<sub>3</sub>) δ (ppm) 13.03 (s, 1H), 8.00-7.97 (m, 2H), 7.87 (td, *J*=7.9Hz, 0.8Hz, 1H), 7.74-7.71 (m, 2H), 7.53-7.45 (m, 2H), 7.27 (d, *J*=8.9Hz, 1H), 7.18 (t, *J*=7.6Hz, 1H), 7.03 (t, *J*=10.7Hz, 1H), 4.05 (d, *J*=7.2Hz, 2H), 1.53 (s, 9H), 1.14 (t, *J*=7.2Hz, 3H). <sup>13</sup>C NMR (126 MHz, CDCl<sub>3</sub>) δ (ppm) 191.85, 163.86, 162.70, 160.64, 154.57, 152.03, 146.26, 138.59, 136.75, 134.98 (d, *J*=35.9Hz), 131.98, 130.36, 128.33, 127.60, 127.05, 126.44,

124.30 (d,  $J=14.5\text{Hz}$ ), 121.02, 119.60, 116.80 (d,  $J=88.1\text{Hz}$ ), 81.83, 62.03, 28.21, 13.58.  $^{19}\text{F}$  NMR (471 MHz,  $\text{CDCl}_3$ )  $\delta$  (ppm) -110.37. HRMS (ESI,  $m/z$ ) calcd for  $\text{C}_{26}\text{H}_{25}\text{N}_2\text{O}_5$   $[\text{M}+\text{Na}]^+$  487.1640, found 487.1656.

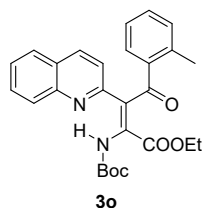

**3o**, yellow oil, 84% yield, 7/1 rr,  $^1\text{H}$  NMR (500 MHz,  $\text{CDCl}_3$ )  $\delta$  (ppm) 13.21 (s, 1H), 8.00 (d,  $J=8.9\text{Hz}$ , 2H), 7.78-7.73 (m, 2H), 7.68 (dd,  $J=7.8\text{Hz}$ , 1.5Hz, 1H), 7.53 (t,  $J=8.4\text{Hz}$ , 1H), 7.35 (td,  $J=7.5\text{Hz}$ , 1.5Hz, 1H), 7.31 (d,  $J=8.9\text{Hz}$ , 1H), 7.26-7.24 (m, 1H), 7.13 (t,  $J=7.5\text{Hz}$ , 1H), 3.95 (q,  $J=7.2\text{Hz}$ , 2H), 2.66 (s, 1H), 1.54 (s, 9H), 1.07 (t,  $J=7.2\text{Hz}$ , 3H).  $^{13}\text{C}$  NMR (126 MHz,  $\text{CDCl}_3$ )  $\delta$  (ppm) 196.95, 163.98, 155.30, 152.07, 146.21, 140.26, 138.91, 136.73, 132.22, 132.08, 131.86, 130.33, 128.32, 127.61, 127.03, 126.43, 125.62, 121.48, 119.34, 81.80, 61.90, 28.25, 21.44, 13.57. HRMS (ESI,  $m/z$ ) calcd for  $\text{C}_{27}\text{H}_{28}\text{N}_2\text{O}_5$   $[\text{M}+\text{Na}]^+$  483.1891, found 483.1904.

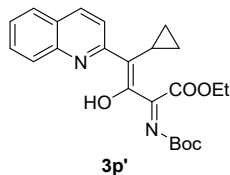

**3p'**, yellow oil, 80% yield, 1/2 rr,  $^1\text{H}$  NMR (500 MHz,  $\text{CDCl}_3$ )  $\delta$  (ppm) 11.61 (s, 1H), 8.16 (d,  $J=8.16\text{Hz}$ , 1H), 8.09 (d,  $J=8.5\text{Hz}$ , 1H), 7.82 (d,  $J=8.2\text{Hz}$ , 1H), 7.73-7.70 (m, 1H), 7.57-7.48 (m, 3H), 3.92 (q,  $J=7.1\text{Hz}$ , 2H), 1.68-1.63 (m, 1H), 1.46 (s, 9H), 1.15-1.12 (m, 2H), 0.88 (t,  $J=7.2\text{Hz}$ , 3H), 0.77-0.74 (m, 2H).  $^{13}\text{C}$  NMR (126 MHz,  $\text{CDCl}_3$ )  $\delta$  (ppm) 202.31, 162.97, 155.48, 151.43, 148.00, 144.20, 136.27, 129.97, 129.53, 127.65, 127.10, 127.04, 124.26, 116.54, 82.59, 61.71, 28.09, 23.32, 20.80, 13.63, 12.82. HRMS (ESI,  $m/z$ ) calcd for  $\text{C}_{23}\text{H}_{26}\text{N}_2\text{O}_5$   $[\text{M}+\text{Na}]^+$  433.1734, found 433.1739.

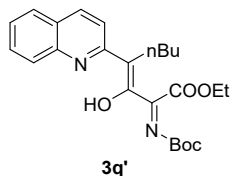

**3q'**, yellow oil, 67% yield, 1/5 rr,  $^1\text{H}$  NMR (500 MHz,  $\text{CDCl}_3$ )  $\delta$  (ppm) 11.59 (s, 1H), 8.18 (d,  $J=8.4\text{Hz}$ , 1H), 8.10 (d,  $J=8.5\text{Hz}$ , 1H), 7.85 (dd,  $J=8.3\text{Hz}$ , 1.4Hz, 1H), 7.7-7.73 (m, 1H), 7.60-7.57 (m, 1H), 7.44 (d,  $J=8.4\text{Hz}$ , 1H), 3.44 (s, 3H), 2.32 (t,  $J=7.3\text{Hz}$ , 2H), 1.48 (s, 9H).  $^{13}\text{C}$  NMR (126 MHz,  $\text{CDCl}_3$ )  $\delta$  (ppm) 203.52, 163.50, 155.14, 151.58, 148.02, 144.15, 136.50, 130.05, 129.58, 127.70, 127.19, 127.01, 123.84, 116.38, 82.82, 52.44, 42.23, 28.12, 26.09, 22.20, 13.91. HRMS (ESI,  $m/z$ ) calcd for

C<sub>23</sub>H<sub>28</sub>N<sub>2</sub>O<sub>5</sub> [M+H]<sup>+</sup> 413.2071, found 413.2080.

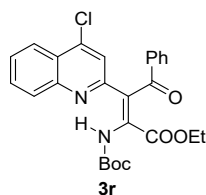

**3r**, yellow solid, m.p. 145.3-146.3 °C, 99% yield, 25/1 rr, <sup>1</sup>H NMR (500 MHz, CDCl<sub>3</sub>) δ (ppm) 12.71 (s, 1H), 8.13 (d, *J*=8.4Hz, 1H), 8.02-7.96 (m, 2H), 7.80 (t, *J*=7.9Hz, 1H), 7.62 (t, *J*=7.8Hz, 1H), 7.56 (t, *J*=7.5Hz, 1H), 7.43 (t, *J*=7.7Hz, 2H), 7.38 (s, 1H), 3.95 (q, *J*=7.2Hz, 2H), 1.54 (s, 9H), 1.05 (t, *J*=7.2Hz, 3H). <sup>13</sup>C NMR (126 MHz, CDCl<sub>3</sub>) δ (ppm) 194.81, 163.50, 154.53, 152.02, 147.03, 143.37, 138.28, 137.81, 133.86, 131.33, 129.95, 128.73, 128.66, 128.03, 124.82, 124.19, 121.18, 117.69, 82.0155, 62.06, 28.22, 13.46. HRMS (ESI, m/z) calcd for C<sub>26</sub>H<sub>25</sub>ClN<sub>2</sub>O<sub>5</sub> [M+Na]<sup>+</sup> 503.1345, found 503.1358.

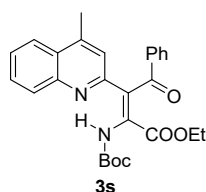

**3s**, yellow solid, m.p. 122.6-123.6 °C, 90% yield, 50/1 rr, <sup>1</sup>H NMR (500 MHz, CDCl<sub>3</sub>) δ (ppm) 13.01 (s, 1H), 8.00-7.98 (m, 3H), 7.90 (dd, *J*=8.4Hz, 1.4Hz, 1H), 7.75-7.72 (m, 1H), 7.56-7.52 (m, 2H), 7.43-7.40 (m, 2H), 7.07 (s, 1H), 3.98 (q, *J*=7.2Hz, 2H), 2.52 (s, 3H), 1.54 (s, 9H), 1.05 (t, *J*=7.2Hz, 3H). <sup>13</sup>C NMR (126 MHz, CDCl<sub>3</sub>) δ (ppm) 195.41, 163.79, 154.33, 152.33, 146.13, 145.35, 138.05, 137.33, 133.61, 130.08, 129.94, 128.97, 128.65, 126.88, 126.68, 123.82, 121.82, 118.81, 81.63, 61.89, 28.26, 18.97, 13.49. HRMS (ESI, m/z) calcd for C<sub>27</sub>H<sub>28</sub>N<sub>2</sub>O<sub>5</sub> [M+H]<sup>+</sup> 461.2071, found 461.2082.

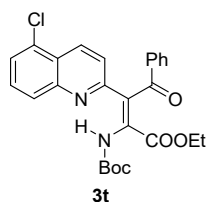

**3t**, yellow solid, m.p. 150.6-151.6 °C, 89% yield, 35/1 rr, <sup>1</sup>H NMR (500 MHz, CDCl<sub>3</sub>) δ (ppm) 12.75 (s, 1H), 8.37 (d, *J*=9.0Hz, 1H), 7.98-7.91(m, 3H), 7.66(t, *J*=7.7Hz, 1H), 7.61-7.54(m, 2H), 7.42(t, *J*=7.7Hz, 2H), 7.29(d, *J*=9.1Hz, 1H), 4.02(q, *J*=7.2Hz, 2H), 1.55(s, 9H), 1.08(t, *J*=7.2Hz, 3H). <sup>13</sup>C NMR (126 MHz, CDCl<sub>3</sub>) δ (ppm) 195.13, 163.61, 155.59, 152.07, 147.07, 138.52, 138.00, 133.77, 133.68, 131.57, 130.19, 129.98, 128.78, 127.52, 127.00, 124.55, 122.37, 117.94, 82.06, 62.11, 28.27, 13.52. HRMS (ESI, m/z) calcd for C<sub>26</sub>H<sub>25</sub>ClN<sub>2</sub>O<sub>5</sub> [M+H]<sup>+</sup> 481.1525, found 481.1529.

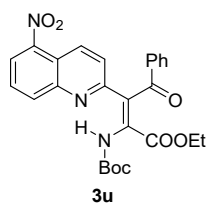

**3u**, yellow solid, m.p. 188.9-189.9 °C, 94% yield, 60/1 rr, <sup>1</sup>H NMR (500 MHz, CDCl<sub>3</sub>) δ (ppm) 12.55 (s, 1H), 8.77 (d, *J*=9.3Hz, 1H), 8.29 (dd, *J*=32.1Hz, 7.7Hz, 2H), 7.97 (d, *J*=7.8Hz, 2H), 7.84 (t, *J*=8.1Hz, 1H), 7.55 (t, *J*=7.5Hz, 1H), 7.41 (q, *J*=7.6Hz, 3H), 4.01 (q, *J*=7.2Hz, 2H), 1.54 (s, 9H), 1.07 (t, *J*=7.2Hz, 3H). <sup>13</sup>C NMR (126 MHz, CDCl<sub>3</sub>) δ (ppm) 194.70, 163.29, 156.18, 151.75, 146.45, 145.39, 139.30, 137.79, 135.02, 133.89, 132.68, 129.89, 128.78, 128.59, 124.70, 124.31, 119.20, 117.17, 82.33, 62.16, 28.17, 13.42. HRMS (ESI, m/z) calcd for C<sub>26</sub>H<sub>25</sub>N<sub>3</sub>O<sub>7</sub> [M+H]<sup>+</sup> 492.1766, found 492.1774.

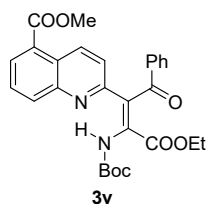

**3v**, yellow solid, m.p. 175.3-176.3 °C, 82% yield, 25/1 rr, <sup>1</sup>H NMR (500 MHz, CDCl<sub>3</sub>) δ (ppm) 12.82 (s, 1H), 9.12 (d, *J*=9.3Hz, 1H), 8.24 (d, *J*=7.3Hz, 1H), 8.16 (d, *J*=8.4Hz, 1H), 7.96 (d, *J*=7.7Hz, 2H), 7.76 (t, *J*=7.7Hz, 1H), 7.54 (t, *J*=7.4Hz, 1H), 7.42-7.39 (m, 2H), 7.27 (d, *J*=9.5Hz, 1H), 4.02 (q, *J*=7.2Hz, 2H), 3.94 (s, 3H), 1.54 (s, 9H), 1.07 (t, *J*=7.2Hz, 3H). <sup>13</sup>C NMR (126 MHz, CDCl<sub>3</sub>) δ (ppm) 195.11, 166.69, 163.59, 154.98, 152.07, 146.42, 138.29, 137.95, 135.18, 133.70, 133.59, 131.06, 129.92, 129.04, 128.72, 126.81, 125.19, 122.90, 117.99, 81.95, 62.03, 52.44, 28.23, 13.47. HRMS (ESI, m/z) calcd for C<sub>28</sub>H<sub>28</sub>N<sub>2</sub>O<sub>7</sub> [M+Na]<sup>+</sup> 527.1789, found 527.1816.

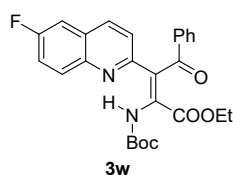

**3w**, yellow solid, m.p. 130.4-131.4 °C, 88% yield, 30/1 rr, <sup>1</sup>H NMR (500 MHz, CDCl<sub>3</sub>) δ (ppm) 12.66 (s, 1H), 8.00-7.92 (m, 4H), 7.55-7.50 (m, 2H), 7.42-7.35 (m, 3H), 7.23 (d, *J*=8.9Hz, 1H), 4.00 (q, *J*=7.1Hz, 2H), 1.54 (s, 9H), 1.06 (t, *J*=7.2Hz, 3H). <sup>13</sup>C NMR (126 MHz, CDCl<sub>3</sub>) δ (ppm) 195.17, 163.67, 160.81 (d, *J*=250.3Hz), 154.14 (d, *J*=2.7Hz), 152.15, 143.43, 137.97, 137.53, 136.17 (d, *J*=5.3Hz), 133.70, 130.85 (d, *J*=9.1Hz), 129.93, 128.71, 127.09 (d, *J*=10.1Hz), 122.20, 120.67 (d, *J*=25.9Hz), 118.52, 110.84 (d, *J*=22.0Hz), 81.89, 62.00, 28.24, 13.48. <sup>19</sup>F NMR (471 MHz, CDCl<sub>3</sub>) δ (ppm) -112.04. HRMS (ESI, m/z) calcd for C<sub>26</sub>H<sub>25</sub>FN<sub>2</sub>O<sub>5</sub> [M+H]<sup>+</sup> 465.1821, found 465.1833.

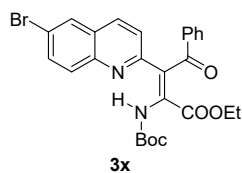

**3x**, yellow solid, m.p. 143.8-144.8 °C, 89% yield, 27/1 rr, <sup>1</sup>H NMR (500 MHz, CDCl<sub>3</sub>) δ (ppm) 12.70 (s, 1H), 7.97 (d, *J*=7.4Hz, 2H), 7.91-7.86 (m, 3H), 7.82-7.80 (m, 1H), 7.55 (t, *J*=7.4Hz, 1H), 7.42 (t, *J*=7.7Hz, 2H), 7.23 (d, *J*=8.8Hz, 1H), 4.00 (q, *J*=7.2Hz, 2H), 1.54 (s, 9H), 1.07 (t, *J*=7.2Hz, 3H). <sup>13</sup>C NMR (126 MHz, CDCl<sub>3</sub>) δ (ppm) 195.15, 163.65, 155.21, 152.11, 145.00, 138.11, 137.99, 135.75, 133.94, 133.77, 130.05, 129.99, 129.72, 128.76, 127.50, 122.38, 120.96, 118.26, 82.04, 62.09, 28.28, 13.52. HRMS (ESI, m/z) calcd for C<sub>26</sub>H<sub>25</sub>BrN<sub>2</sub>O<sub>5</sub> [M+H]<sup>+</sup> 525.1020, found 525.1025.

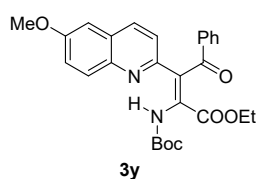

**3y**, yellow solid, m.p. 117.6-118.6 °C, 98% yield, 25/1 rr, <sup>1</sup>H NMR (500 MHz, CDCl<sub>3</sub>) δ (ppm) 12.72 (s, 1H), 7.99-7.97 (m, 2H), 7.91-7.86 (m, 2H), 7.55-7.52 (m, 1H), 7.42-7.39 (m, 3H), 7.17 (d, *J*=8.8Hz, 1H), 7.00 (d, *J*=2.8Hz, 1H), 4.00 (q, *J*=7.1Hz, 2H), 3.92 (s, 3H), 1.54 (s, 9H), 1.06 (t, *J*=7.2Hz, 3H). <sup>13</sup>C NMR (126 MHz, CDCl<sub>3</sub>) δ (ppm) 195.45, 163.90, 158.49, 152.40, 152.17, 142.48, 138.11, 136.43, 135.50, 133.59, 129.97, 128.69, 127.66, 123.31, 121.82, 119.33, 105.15, 81.65, 61.91, 55.77, 28.31, 13.53. HRMS (ESI, m/z) calcd for C<sub>27</sub>H<sub>28</sub>N<sub>2</sub>O<sub>6</sub> [M+H]<sup>+</sup> 477.2021, found 477.2033.

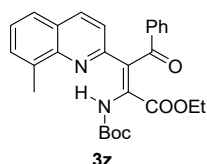

**3z**, yellow solid, m.p. 141.1-142.1 °C, 93% yield, 100/1 rr, <sup>1</sup>H NMR (500 MHz, CDCl<sub>3</sub>) δ (ppm) 13.17 (s, 1H), 8.00-7.94 (m, 3H), 7.60 (t, *J*=7.1Hz, 2H), 7.54 (t, *J*=7.4Hz, 1H), 7.42 (q, *J*=7.3Hz, 3H), 7.15 (d, *J*=8.8Hz, 1H), 4.05 (q, *J*=7.2Hz, 2H), 2.86 (s, 3H), 1.54 (s, 9H), 1.09 (t, *J*=7.2Hz, 3H). <sup>13</sup>C NMR (126 MHz, CDCl<sub>3</sub>) δ (ppm) 195.56, 163.87, 153.70, 152.34, 145.63, 138.11, 137.60, 137.15, 136.05, 133.64, 130.64, 130.01, 128.70, 126.89, 126.40, 125.69, 121.29, 118.67, 81.70, 62.00, 28.25, 19.05, 13.52. HRMS (ESI, m/z) calcd for C<sub>27</sub>H<sub>28</sub>N<sub>2</sub>O<sub>5</sub> [M+Na]<sup>+</sup> 483.1891, found 483.1911.

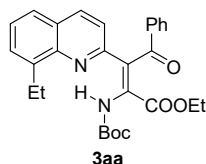

**3aa**, yellow solid, m.p. 153.2-154.2 °C, 99% yield, 100/1 rr, <sup>1</sup>H NMR (500 MHz, CDCl<sub>3</sub>) δ (ppm) 12.91 (s, 1H), 8.00 (d, *J*=7.7Hz, 2H), 7.95 (d, *J*=8.9Hz, 1H), 7.62-7.53 (m, 3H), 7.49-7.40 (m, 3H), 7.15 (d, *J*=8.8Hz, 1H), 4.05 (q, *J*=14.3Hz, 2H), 3.33 (q, *J*=7.6Hz, 2H), 1.56 (s, 9H), 1.47 (t, *J*=7.5Hz, 3H), 1.08 (t, *J*=7.2Hz, 3H). <sup>13</sup>C NMR (126 MHz, CDCl<sub>3</sub>) δ (ppm) 195.67, 163.94, 153.66, 152.42, 145.07, 141.61, 138.10, 137.29, 137.27, 133.65, 130.01, 128.78, 128.70, 127.02, 126.58, 125.68, 121.30, 118.90, 81.81, 61.99, 28.31, 25.0147, 14.40, 13.52. HRMS (ESI, m/z) calcd for C<sub>28</sub>H<sub>30</sub>N<sub>2</sub>O<sub>5</sub> [M+Na]<sup>+</sup> 497.2047, found 497.2084.

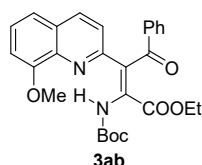

**3ab**, yellow solid, m.p. 157.3-158.3 °C, 99% yield, 75/1 rr, <sup>1</sup>H NMR (500 MHz, CDCl<sub>3</sub>) δ (ppm) 13.16 (s, 1H), 7.98 (d, *J*=7.2Hz, 2H), 7.90 (d, *J*=8.8Hz, 1H), 7.54-7.50 (m, 1H), 7.44-7.37 (m, 3H), 7.27 (d, *J*=8.3Hz, 1H), 7.18 (d, *J*=8.8Hz, 1H), 7.06 (d, *J*=7.8Hz, 1H), 4.11 (s, 3H), 3.99 (q, 7.2Hz, 2H), 1.57 (s, 9H), 1.06 (t, *J*=7.1Hz, 3H). <sup>13</sup>C NMR (126 MHz, CDCl<sub>3</sub>) δ (ppm) 195.50, 164.12, 154.71, 152.98, 152.73, 138.18, 138.06, 137.49, 136.39, 133.54, 129.93, 128.59, 127.23, 127.19, 121.42, 119.03, 118.64, 108.29, 81.45, 61.76, 55.99, 28.36, 13.47. HRMS (ESI, m/z) calcd for C<sub>27</sub>H<sub>28</sub>N<sub>2</sub>O<sub>6</sub> [M+H]<sup>+</sup> 477.2021, found 477.2030.

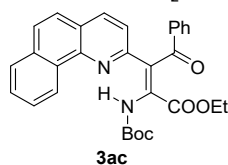

**3ac**, yellow solid, m.p. 175.3-176.3 °C, 74% yield, 25/1 rr, <sup>1</sup>H NMR (500 MHz, CDCl<sub>3</sub>) δ (ppm) 13.10 (s, 1H), 9.12-9.11 (m, 1H), 8.03-7.99 (m, 3H), 7.96-7.94 (m, 1H), 7.81 (d, *J*=8.8Hz, 1H), 7.77-7.73 (m, 2H), 7.60 (d, *J*=8.8Hz, 1H), 7.55 (t, *J*=7.4Hz, 1H), 7.42 (t, *J*=7.6Hz, 2H), 7.28 (d, *J*=8.5Hz, 1H), 4.08 (q, *J*=7.2Hz, 2H), 1.64 (s, 9H), 1.11 (t, *J*=7.2Hz, 3H). <sup>13</sup>C NMR (126 MHz, CDCl<sub>3</sub>) δ (ppm) 195.56, 163.87, 153.32, 152.31, 145.03, 138.05, 136.87, 136.83, 134.34, 133.67, 130.41, 130.06, 128.73, 128.72, 128.56, 127.57, 125.06, 124.98, 124.14, 122.39, 119.21, 81.85, 62.06, 28.46, 13.56. HRMS (ESI, m/z) calcd for C<sub>30</sub>H<sub>28</sub>N<sub>2</sub>O<sub>5</sub> [M+H]<sup>+</sup> 497.2071, found 497.2075

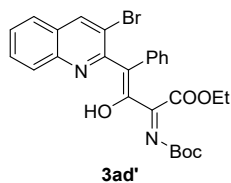

**3ad'**, yellow solid, m.p. 139.9-141.4 °C, 99% yield, 1/3 rr,  $^1\text{H}$  NMR (500 MHz,  $\text{CDCl}_3$ )  $\delta$  (ppm) 11.47 (s, 1H), 8.11-8.09 (m, 2H), 7.75-7.71 (m, 1H), 7.65-7.63 (m, 1H), 7.55-7.52 (m, 1H), 7.36 (d,  $J=7.7\text{Hz}$ , 2H), 7.26-7.20 (m, 2H), 7.04 (t,  $J=7.6\text{Hz}$ , 2H), 3.95 (q,  $J=7.2\text{Hz}$ , 2H), 1.50 (s, 9H), 0.94 (t,  $J=7.2\text{Hz}$ , 3H).  $^{13}\text{C}$  NMR (126 MHz,  $\text{CDCl}_3$ )  $\delta$  (ppm) 195.64, 162.44, 155.19, 151.04, 147.02, 146.19, 140.10, 139.02, 131.19, 130.14, 129.28, 128.53, 127.92, 127.57, 126.62, 120.55, 115.30, 82.93, 61.81, 28.02, 13.63. HRMS (ESI,  $m/z$ ) calcd for  $\text{C}_{26}\text{H}_{25}\text{BrN}_2\text{O}_5$   $[\text{M}+\text{Na}]^+$  547.0840, found 547.0853.

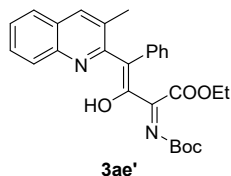

**3ae'**, yellow solid, m.p. 135.1-136.6 °C, 78% yield, 1/2 rr,  $^1\text{H}$  NMR (500 MHz,  $\text{CDCl}_3$ )  $\delta$  (ppm) 11.58 (s, 1H), 8.10 (d,  $J=8.6\text{Hz}$ , 1H), 7.91 (d,  $J=7.8\text{Hz}$ , 1H), 7.68 (s, 1H), 7.66-7.64 (m, 2H), 7.62-7.59 (m, 1H), 7.49 (t,  $J=7.9\text{Hz}$ , 1H), 7.33-7.30 (m, 2H), 7.21 (t,  $J=7.8\text{Hz}$ , 1H), 7.03 (t,  $J=7.7\text{Hz}$ , 2H), 3.90 (q,  $J=7.2\text{Hz}$ , 2H), 2.10 (s, 3H), 1.50 (s, 9H), 0.90 (t,  $J=7.2\text{Hz}$ , 3H).  $^{13}\text{C}$  NMR (126 MHz,  $\text{CDCl}_3$ )  $\delta$  (ppm) 196.00, 162.80, 156.70, 151.31, 147.01, 146.37, 140.10, 136.19, 132.26, 131.33, 129.62, 129.12, 128.85, 128.42, 127.78, 126.95, 126.93, 115.11, 82.89, 61.77, 28.10, 19.47, 13.64. HRMS (ESI,  $m/z$ ) calcd for  $\text{C}_{27}\text{H}_{28}\text{N}_2\text{O}_5$   $[\text{M}+\text{H}]^+$  461.2071, found 461.2089.

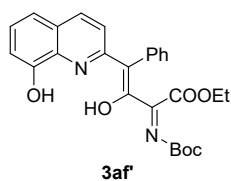

**3af'**, yellow solid, m.p. 141.3-142.8 °C, 86% yield, 1/2 rr,  $^1\text{H}$  NMR (500 MHz,  $\text{CDCl}_3$ )  $\delta$  (ppm) 11.03 (s, 0.33H), 10.47 (s, 0.67H), 8.03 (d,  $J=8.7\text{Hz}$ , 0.64H), 7.96 (d,  $J=7.8\text{Hz}$ , 1.30H), 7.84 (d,  $J=8.6\text{Hz}$ , 0.35H), 7.55-7.29 (m, 5.2H), 7.24-7.14 (m, 2.18H), 7.02 (d,  $J=8.6\text{Hz}$ , 0.34H), 4.08 (q,  $J=7.2\text{Hz}$ , 2H), 1.52 (s, 6H), 1.51 (s, 3H), 1.09 (t,  $J=7.2\text{Hz}$ , 2H), 0.98 (t,  $J=7.2\text{Hz}$ , 1H).  $^{13}\text{C}$  NMR (126 MHz,  $\text{CDCl}_3$ )  $\delta$  (ppm) 196.97, 194.77, 163.54, 163.51, 153.49, 152.92, 152.32, 151.86, 151.56, 151.16, 146.47, 139.80, 137.74, 137.39, 137.09, 135.72, 133.65, 131.85, 129.90, 128.77, 128.70, 128.54, 128.26, 128.17, 127.31, 126.84, 124.61, 122.66, 118.49, 117.70, 112.20, 110.52, 83.18, 82.59, 62.34, 62.26, 28.25, 28.14, 13.58, 13.54. HRMS (ESI,

m/z) calcd for C<sub>26</sub>H<sub>26</sub>N<sub>2</sub>O<sub>6</sub> [M+H]<sup>+</sup> 463.1864, found 463.1872.

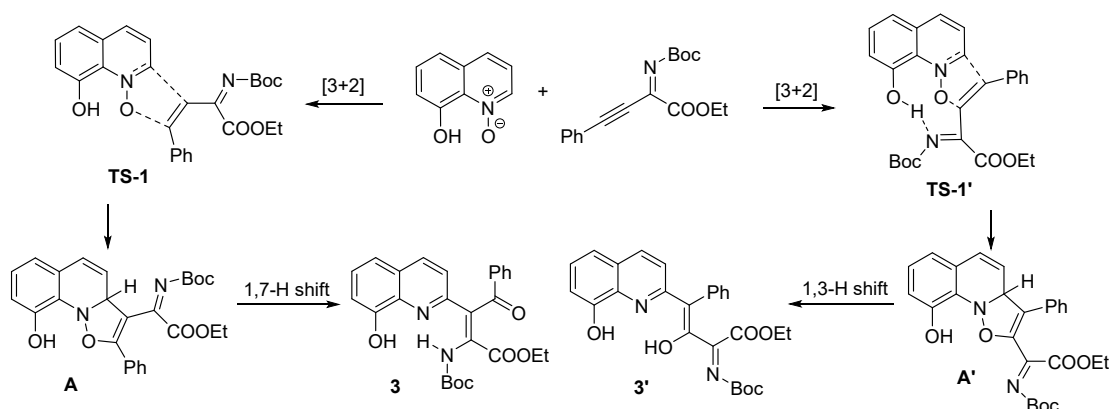

### Scheme S1 Reaction mechanism involving 8-hydroxyquinoline N-oxide

In the reaction of 8-hydroxyquinoline N-oxide with the alkynyl imine, we propose that an intermolecular hydrogen bond is formed between the hydroxyl group of the quinoline N-oxide and the nitrogen atom of the alkynyl imine substrate. This non-covalent interaction pre-organizes the two reactants in a specific orientation that favors the [3+2] cycloaddition pathway leading to intermediate **A'** (the precursor to the minor regioisomer **3af'**), rather than the normally favored intermediate **A**. As a result, the final product **3af'** becomes the major regioisomer, with a observed ratio of 1:2 (rr) and 86% isolated yield.

This hypothesis is supported by several considerations:

- (1) The 8-hydroxy group is a good hydrogen bond donor, and the imine nitrogen (or the carbonyl oxygen of the Boc) in the alkyne is a good hydrogen bond acceptor.
- (2) Such intermolecular hydrogen bonding interactions are known to influence regioselectivity in cycloaddition reactions by stabilizing specific transition states.
- (3) The absence of this effect in 8-substituted quinolines lacking a free OH group (e.g., 8-Me **3z**, 8-Et **3aa**, 8-OMe **3ab**) leads to the normal selectivity (favoring **3**), which further supports the key role of the OH group in directing the selectivity through hydrogen bonding.

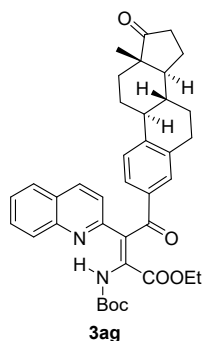

**3ag**, yellow solid, m.p. 156.1-157.1 °C, 60% yield, 23/1 rr, <sup>1</sup>H NMR (500 MHz, CDCl<sub>3</sub>) δ (ppm) 12.94 (s, 1H), 8.01-7.96 (m, 2H), 7.77-7.72 (m, 4H), 7.53 (t, *J*=7.4Hz, 1H), 7.31 (d, *J*=8.1Hz, 1H), 7.20 (d, *J*=8.8Hz, 1H), 4.05 (q, *J*=7.2Hz, 2H), 2.95-2.88

(m, 2H), 2.52-2.47 (m, 1H), 2.41-2.28 (m, 2H), 2.17-1.95 (m, 4H), 1.67-1.39 (m, 15H), 1.11 (t,  $J=7.2\text{Hz}$ , 3H), 0.89 (s, 3H).  $^{13}\text{C}$  NMR (126 MHz,  $\text{CDCl}_3$ )  $\delta$  (ppm) 195.22, 163.90, 154.89, 152.32, 146.36, 146.21, 137.30, 137.12, 136.75, 135.68, 130.41, 130.38, 128.43, 127.62, 127.58, 127.10, 126.47, 125.72, 121.58, 118.84, 81.72, 61.93, 50.67, 47.96, 44.91, 37.88, 35.90, 31.64, 28.29, 26.34, 25.61, 21.68, 13.91, 13.61. HRMS (ESI,  $m/z$ ) calcd for  $\text{C}_{38}\text{H}_{42}\text{N}_2\text{O}_6$   $[\text{M}+\text{Na}]^+$  623.3116, found 623.3122.

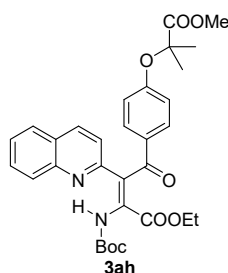

**3ah**, yellow solid, m.p. 123.5-124.5 °C, 75% yield, 34/1 rr,  $^1\text{H}$  NMR (500 MHz,  $\text{CDCl}_3$ )  $\delta$  (ppm) 12.90 (s, 1H), 7.99-7.96 (m, 2H), 7.89 (d,  $J=8.6\text{Hz}$ , 2H), 7.75-7.72 (m, 2H), 7.52 (t,  $J=8.35\text{Hz}$ , 1H), 7.22 (d,  $J=8.7\text{Hz}$ , 1H), 6.75 (d,  $J=8.5\text{Hz}$ , 2H), 4.03 (q,  $J=7.1\text{Hz}$ , 2H), 3.71 (s, 3H), 1.61 (s, 6H), 1.53 (s, 9H), 1.07 (t,  $J=7.1\text{Hz}$ , 3H).  $^{13}\text{C}$  NMR (126 MHz,  $\text{CDCl}_3$ )  $\delta$  (ppm) 193.76, 174.12, 163.79, 160.28, 154.77, 152.29, 146.32, 137.06, 136.74, 131.95, 131.66, 130.36, 128.36, 127.60, 127.07, 126.44, 121.47, 118.67, 117.44, 81.65, 79.43, 61.87, 52.71, 28.24, 25.44, 13.51. HRMS (ESI,  $m/z$ ) calcd for  $\text{C}_{31}\text{H}_{34}\text{N}_2\text{O}_8$   $[\text{M}+\text{H}]^+$  563.2338, found 563.2393.

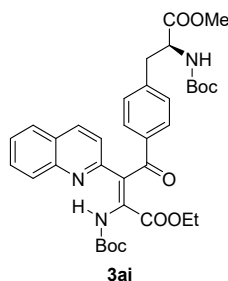

**3ai**, yellow solid, m.p. 95.5-96.5 °C, 66% yield, 27/1 rr,  $^1\text{H}$  NMR (500 MHz,  $\text{CDCl}_3$ )  $\delta$  (ppm) 12.91 (s, 1H), 7.98 (t,  $J=8.5\text{Hz}$ , 2H), 7.90 (d,  $J=7.9\text{Hz}$ , 2H), 7.75-7.72 (m, 2H), 7.52 (t,  $J=7.5\text{Hz}$ , 1H), 7.19-7.16 (m, 3H), 5.00 (d,  $J=8.2\text{Hz}$ , 1H), 4.57 (q,  $J=6.7\text{Hz}$ , 1H), 4.00 (q,  $J=7.2\text{Hz}$ , 2H), 3.67 (s, 3H), 3.18-3.04 (m, 2H), 1.53 (s, 9H), 1.38 (s, 9H), 1.07 (t,  $J=7.2\text{Hz}$ , 3H).  $^{13}\text{C}$  NMR (126 MHz,  $\text{CDCl}_3$ )  $\delta$  (ppm) 194.78, 171.91, 163.71, 155.03, 154.64, 152.22, 146.31, 142.49, 137.55, 136.8357, 136.76, 130.41, 130.12, 129.66, 128.34, 127.60, 127.11, 126.43, 121.43, 118.54, 81.73, 80.15, 61.93, 54.25, 52.38, 38.40, 28.32, 28.22, 13.51. HRMS (ESI,  $m/z$ ) calcd for  $\text{C}_{35}\text{H}_{41}\text{N}_3\text{O}_9$   $[\text{M}+\text{Na}]^+$  670.2735, found 670.2756.

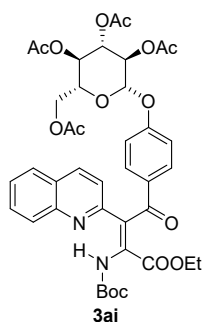

**3aj**, yellow solid, m.p. 151.9-152.9 °C, 68% yield, 30/1 rr, <sup>1</sup>H NMR (500 MHz, CDCl<sub>3</sub>) δ (ppm) 12.83 (s, 1H), 7.93 (t, *J*=9.1Hz, 4H), 7.72-7.69 (m, 2H), 7.49 (t, *J*=7.6Hz, 1H), 7.10 (t, *J*=8.8Hz, 1H), 6.95 (d, *J*=8.9Hz, 2H), 5.29-5.22 (m, 2H), 5.17-5.10 (m, 2H), 4.25-4.21 (m, 1H), 4.11-4.08 (m, 1H), 4.02 (q, *J*=7.2Hz, 2H), 3.89-3.86 (m, 1H), 1.99-1.96 (m, 12H), 1.50 (s, 9H), 1.07 (t, *J*=7.2Hz, 3H). <sup>13</sup>C NMR (126 MHz, CDCl<sub>3</sub>) δ (ppm) 193.68, 170.37, 170.03, 169.31, 169.14, 163.66, 160.60, 154.52, 152.11, 146.19, 137.23, 136.72, 133.10, 132.05, 130.37, 128.20, 127.53, 127.05, 126.29, 121.28, 118.31, 116.25, 97.97, 81.62, 77.36, 72.52, 72.19, 70.97, 68.09, 61.83, 61.80, 28.11, 20.55, 20.51, 20.48, 13.45. HRMS (ESI, m/z) calcd for C<sub>40</sub>H<sub>44</sub>N<sub>2</sub>O<sub>15</sub> [M+Na]<sup>+</sup> 815.2634, found 815.2662.

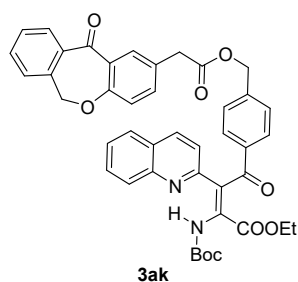

**3ak**, yellow solid, m.p. 123.7-124.7 °C, 55% yield, 30/1 rr, <sup>1</sup>H NMR (500 MHz, CDCl<sub>3</sub>) δ (ppm) 12.93 (s, 1H), 7.93 (t, *J*=9.1Hz, 4H), 8.12 (d, *J*=2.4Hz, 1H), 8.01-7.95 (m, 4H), 7.86 (d, *J*=7.7Hz, 1H), 7.77-7.72 (m, 2H), 7.55-7.51 (m, 2H), 7.46-7.43 (m, 1H), 7.40 (dd, *J*=8.5Hz, 2.5Hz, 1H), 7.36-7.33 (m, 3H), 7.15 (d, *J*=8.8Hz, 1H), 7.01 (d, *J*=8.5Hz, 1H), 5.16 (d, *J*=6.0Hz, 4H), 4.03 (q, *J*=7.2Hz, 2H), 3.69 (s, 2H), 1.55 (s, 9H), 1.08 (t, *J*=7.2Hz, 3H). <sup>13</sup>C NMR (126 MHz, CDCl<sub>3</sub>) δ (ppm) 194.80, 190.79, 171.05, 163.73, 160.63, 154.63, 152.20, 146.32, 141.53, 140.45, 137.77, 136.82, 136.33, 135.60, 132.88, 132.56, 130.44, 130.20, 129.54, 129.35, 128.37, 127.91, 127.84, 127.63, 127.47, 127.12, 126.43, 125.25, 121.46, 121.22, 118.40, 81.79, 73.69, 65.89, 61.99, 40.20, 28.25, 13.53. HRMS (ESI, m/z) calcd for C<sub>43</sub>H<sub>38</sub>N<sub>2</sub>O<sub>9</sub> [M+H]<sup>+</sup> 727.2651, found 727.2662.

## 4.2. Preparation and characterization of 5

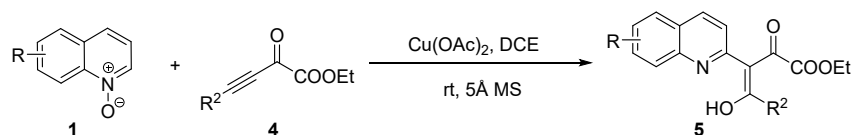

A mixture of quinoline N-oxides **1** (0.24 mmol), ynones **4** (0.20 mmol),  $\text{Cu}(\text{OAc})_2$  (0.01 mmol, 5 mol%) and 5Å molecular sieves (100 mg) in anhydrous DCE (2 mL) was stirred at room temperature. Upon completion (monitored by TLC), the reaction mixture was filtered, concentrated under reduced pressure, and purified by column chromatography on silica gel (eluent: petroleum ether/ethyl acetate = 4:1 to 1:1) to afford product **5**.

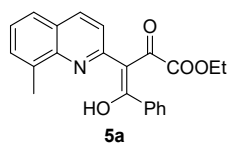

**5a**, yellow oil, 96% yield,  $^1\text{H}$  NMR (500 MHz,  $\text{CDCl}_3$ )  $\delta$  (ppm) 8.00 (d,  $J=9.4\text{Hz}$ , 1H), 7.87 (d,  $J=7.6\text{Hz}$ , 2H), 7.63-7.58 (m, 3H), 7.51 (t,  $J=7.6\text{Hz}$ , 1H), 7.43-7.40 (m, 3H), 3.88 (q,  $J=7.3\text{Hz}$ , 2H), 2.76 (s, 3H), 1.11 (t,  $J=7.2\text{Hz}$ , 3H).  $^{13}\text{C}$  NMR (126 MHz,  $\text{CDCl}_3$ )  $\delta$  (ppm) 194.99, 179.89, 165.13, 154.51, 141.02, 139.69, 135.54, 132.91, 132.51, 129.49, 128.59, 127.47, 125.89, 125.84, 124.28, 119.78, 105.29, 61.83, 17.24, 13.81. HRMS (ESI,  $m/z$ ) calcd for  $\text{C}_{22}\text{H}_{19}\text{NO}_4$   $[\text{M}+\text{Na}]^+$  384.1207, found 384.1222.

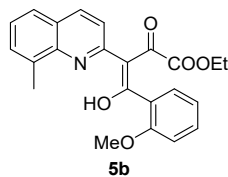

**5b**, yellow oil, 78% yield,  $^1\text{H}$  NMR (500 MHz,  $\text{CDCl}_3$ )  $\delta$  (ppm) 8.67-8.01 (m, 2H), 7.58-7.36 (m, 5H), 6.96 (t,  $J=7.5\text{Hz}$ , 1H), 6.89 (d,  $J=8.4\text{Hz}$ , 1H), 3.81-3.57 (m, 5H), 2.70 (s, 3H), 1.11 (s, 3H).  $^{13}\text{C}$  NMR (126 MHz,  $\text{CDCl}_3$ )  $\delta$  (ppm) 192.63, 186.98, 183.41, 165.66, 154.54, 139.97, 135.20, 132.63, 132.14, 131.32, 130.69, 127.30, 125.72, 125.64, 124.23, 120.39, 119.89, 111.40, 61.48, 55.83, 17.15, 13.77. HRMS (ESI,  $m/z$ ) calcd for  $\text{C}_{23}\text{H}_{21}\text{NO}_5$   $[\text{M}+\text{Na}]^+$  414.1312, found 414.1318.

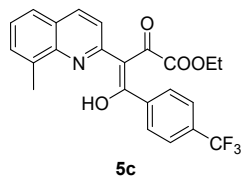

**5c**, yellow oil, 70% yield,  $^1\text{H}$  NMR (500 MHz,  $\text{CDCl}_3$ )  $\delta$  (ppm) 8.06-7.94 (m, 3H), 7.67-7.58 (m, 5H), 7.42 (t,  $J=7.6\text{Hz}$ , 3H), 3.86 (q,  $J=6.5\text{Hz}$ , 2H), 2.74 (s, 3H), 1.07 (t,  $J=7.3\text{Hz}$ , 3H).  $^{13}\text{C}$  NMR (126 MHz,  $\text{CDCl}_3$ )  $\delta$  (ppm) 193.66, 180.29, 165.01, 154.32, 144.14, 140.18, 135.35, 133.08, 129.68, 127.43, 127.05, 126.00 (d,  $J=31.5\text{Hz}$ ), 125.48, 124.35, 123.80 (d,  $J=272.2\text{Hz}$ ), 120.55, 119.45, 104.66, 61.96, 17.13, 13.66.  $^{19}\text{F}$  NMR

(471 MHz, CDCl<sub>3</sub>)  $\delta$  (ppm) -62.98. HRMS (ESI, m/z) calcd for C<sub>23</sub>H<sub>18</sub>F<sub>3</sub>NO<sub>4</sub> [M+Na]<sup>+</sup> 452.1081, found 452.1083.

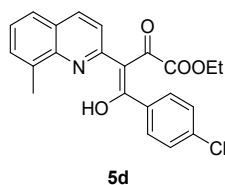

**5d**, yellow oil, 73% yield, <sup>1</sup>H NMR (500 MHz, CDCl<sub>3</sub>)  $\delta$  (ppm) 7.99 (d, *J*=9.4Hz, 1H), 7.78 (d, *J*=8.1Hz, 2H), 7.57-7.54 (m, 4H), 7.41-7.35 (m, 3H), 3.92 (q, *J*=7.4Hz, 2H), 2.71 (s, 3H). <sup>13</sup>C NMR (126 MHz, CDCl<sub>3</sub>)  $\delta$  (ppm) 193.57, 179.60, 164.99, 154.22, 139.8561, 139.36, 138.73, 135.38, 132.96, 130.77, 128.77, 127.35, 125.97, 125.83, 124.22, 119.48, 104.86, 61.89, 17.11, 13.76. HRMS (ESI, m/z) calcd for C<sub>22</sub>H<sub>18</sub>ClNO<sub>4</sub> [M+Na]<sup>+</sup> 418.0817, found 418.0824.

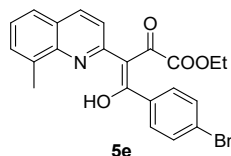

**5e**, yellow oil, 55% yield, <sup>1</sup>H NMR (500 MHz, CDCl<sub>3</sub>)  $\delta$  (ppm) 8.01 (d, *J*=9.4Hz, 1H), 7.73 (d, *J*=8.1Hz, 2H), 7.61-7.54 (m, 5H), 7.42 (t, *J*=7.6Hz, 1H), 3.94 (q, *J*=7.3Hz, 2H), 2.76 (s, 3H), 1.14 (t, *J*=7.2Hz, 3H). <sup>13</sup>C NMR (126 MHz, CDCl<sub>3</sub>)  $\delta$  (ppm) 193.84, 179.69, 165.03, 154.32, 139.94, 139.85, 135.51, 133.04, 131.84, 130.98, 127.50, 126.04, 125.89, 124.33, 119.60, 104.91, 62.01, 17.22, 13.83. HRMS (ESI, m/z) calcd for C<sub>22</sub>H<sub>18</sub>BrNO<sub>4</sub> [M+Na]<sup>+</sup> 462.0312, found 462.0317.

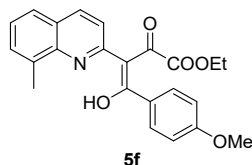

**5f**, yellow oil, 80% yield, <sup>1</sup>H NMR (500 MHz, CDCl<sub>3</sub>)  $\delta$  (ppm) 7.94 (d, *J*=9.4Hz, 1H), 7.85 (d, *J*=8.4Hz, 2H), 7.55 (d, *J*=7.6Hz, 2H), 7.47 (d, *J*=9.3Hz, 1H), 7.37 (t, *J*=7.6Hz, 1H), 6.88 (d, *J*=8.8Hz, 2H), 3.94 (q, *J*=7.2Hz, 2H), 3.82 (s, 3H), 2.71 (s, 3H), 1.12 (t, *J*=7.2Hz, 3H). <sup>13</sup>C NMR (126 MHz, CDCl<sub>3</sub>)  $\delta$  (ppm) 193.62, 178.70, 165.07, 163.29, 154.29, 139.38, 135.56, 133.68, 132.78, 131.66, 127.34, 125.77, 125.72, 124.14, 119.73, 113.76, 105.55, 61.72, 55.53, 17.15, 13.81. HRMS (ESI, m/z) calcd for C<sub>23</sub>H<sub>21</sub>NO<sub>5</sub> [M+Na]<sup>+</sup> 414.1312, found 414.1312.

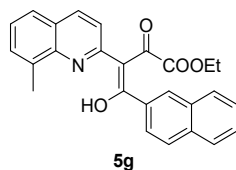

**5g**, yellow oil, 77% yield, <sup>1</sup>H NMR (500 MHz, CDCl<sub>3</sub>)  $\delta$  (ppm) 8.26 (s, 1H), 8.01-

7.95 (m, 2H), 7.87-7.82 (m, 3H), 7.69 (d,  $J=9.5\text{Hz}$ , 1H), 7.56-7.46 (m, 4H), 7.37 (t,  $J=7.1\text{Hz}$ , 1H), 3.68 (q,  $J=7.3\text{Hz}$ , 2H), 2.73 (s, 3H), 0.85 (t,  $J=7.3\text{Hz}$ , 3H).  $^{13}\text{C}$  NMR (126 MHz,  $\text{CDCl}_3$ )  $\delta$  (ppm) 194.76, 180.07, 165.09, 154.43, 139.72, 138.47, 135.33, 135.25, 132.83, 132.34, 130.75, 129.41, 128.61, 128.20, 127.74, 127.25, 126.74, 125.83, 125.77, 125.31, 124.18, 119.64, 105.24, 61.66, 17.11, 13.44. HRMS (ESI,  $m/z$ ) calcd for  $\text{C}_{26}\text{H}_{21}\text{NO}_4$   $[\text{M}+\text{Na}]^+$  434.1363, found 434.1371.

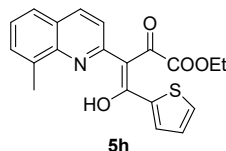

**5h**, yellow oil, 90% yield,  $^1\text{H}$  NMR (500 MHz,  $\text{CDCl}_3$ )  $\delta$  (ppm) 8.12 (d,  $J=9.4\text{Hz}$ , 1H), 7.68-7.54 (m, 5H), 7.39 (t,  $J=7.6\text{Hz}$ , 1H), 7.02 (t,  $J=4.4\text{Hz}$ , 1H), 3.98 (q,  $J=7.2\text{Hz}$ , 2H), 2.73 (s, 3H), 1.14 (t,  $J=7.2\text{Hz}$ , 3H).  $^{13}\text{C}$  NMR (126 MHz,  $\text{CDCl}_3$ )  $\delta$  (ppm) 186.67, 178.23, 164.88, 153.96, 148.05, 139.76, 135.43, 133.86, 133.04, 132.90, 127.74, 127.37, 125.90, 125.83, 124.28, 119.44, 105.71, 61.98, 17.16, 13.83. HRMS (ESI,  $m/z$ ) calcd for  $\text{C}_{20}\text{H}_{17}\text{NO}_4\text{S}$   $[\text{M}+\text{Na}]^+$  390.0771, found 390.0778.

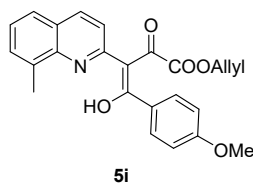

**5i**, yellow oil, 83% yield,  $^1\text{H}$  NMR (500 MHz,  $\text{CDCl}_3$ )  $\delta$  (ppm) 7.95 (d,  $J=9.4\text{Hz}$ , 1H), 7.83 (d,  $J=8.4\text{Hz}$ , 2H), 7.56-7.48 (m, 3H), 7.37 (t,  $J=7.6\text{Hz}$ , 1H), 6.87 (d,  $J=8.7\text{Hz}$ , 2H), 5.77-5.69 (m, 1H), 5.24-5.14 (m, 2H), 4.34 (d,  $J=6.1\text{Hz}$ , 2H), 3.82 (s, 3H), 2.71 (s, 3H).  $^{13}\text{C}$  NMR (126 MHz,  $\text{CDCl}_3$ )  $\delta$  (ppm) 193.59, 178.58, 164.75, 163.25, 154.26, 139.46, 135.46, 133.61, 132.80, 131.67, 131.28, 127.30, 125.77, 124.14, 119.71, 119.18, 113.76, 105.51, 66.33, 55.51, 17.14. HRMS (ESI,  $m/z$ ) calcd for  $\text{C}_{24}\text{H}_{21}\text{NO}_5$   $[\text{M}+\text{Na}]^+$  426.1312, found 426.1335.

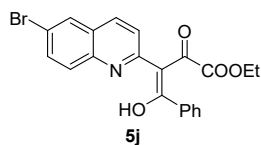

**5j**, yellow oil, 94% yield,  $^1\text{H}$  NMR (500 MHz,  $\text{CDCl}_3$ )  $\delta$  (ppm) 7.87-7.87 (m, 5H), 7.57-7.50 (m, 3H), 7.41 (t,  $J=7.6\text{Hz}$ , 2H), 3.84 (s, 2H), 1.09 (t,  $J=7.2\text{Hz}$ , 3H).  $^{13}\text{C}$  NMR (126 MHz,  $\text{CDCl}_3$ )  $\delta$  (ppm) 196.70, 181.26, 164.73, 154.96, 140.74, 137.82, 135.37, 135.19, 132.62, 130.21, 129.44, 128.64, 125.37, 121.34, 120.73, 119.39, 106.12, 61.85, 13.76. HRMS (ESI,  $m/z$ ) calcd for  $\text{C}_{21}\text{H}_{16}\text{BrNO}_4$   $[\text{M}+\text{Na}]^+$  448.0155, found 448.0166.

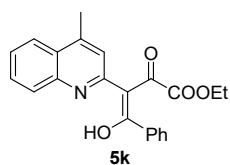

**5k**, yellow oil, 96% yield,  $^1\text{H}$  NMR (500 MHz,  $\text{CDCl}_3$ )  $\delta$  (ppm) 8.00 (d,  $J=9.4\text{Hz}$ , 1H), 7.87 (d,  $J=7.6\text{Hz}$ , 2H), 7.63-7.49 (m, 4H), 7.41 (t,  $J=7.5\text{Hz}$ , 3H), 3.88 (q,  $J=7.2\text{Hz}$ , 2H), 2.76 (s, 3H), 1.11 (t,  $J=7.2\text{Hz}$ , 3H).  $^{13}\text{C}$  NMR (126 MHz,  $\text{CDCl}_3$ )  $\delta$  (ppm) 195.33, 165.12, 154.37, 148.84, 141.24, 135.80, 132.25, 132.00, 129.45, 128.48, 125.98, 124.51, 124.49, 119.73, 119.42, 104.04, 61.62, 19.77, 13.74. HRMS (ESI,  $m/z$ ) calcd for  $\text{C}_{22}\text{H}_{19}\text{NO}_4$   $[\text{M}+\text{Na}]^+$  384.1207, found 384.1215.

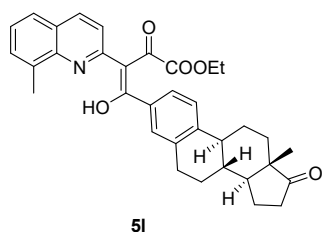

**5l**, yellow oil, 60% yield,  $^1\text{H}$  NMR (500 MHz,  $\text{CDCl}_3$ )  $\delta$  (ppm) 7.97 (d,  $J=9.4\text{Hz}$ , 1H), 7.64-7.53 (m, 5H), 7.38 (t,  $J=7.6\text{Hz}$ , 1H), 7.31 (d,  $J=8.1\text{Hz}$ , 1H), 3.92 (q,  $J=7.1\text{Hz}$ , 2H), 2.92-2.89 (m, 2H), 2.73 (s, 3H), 2.52-2.46 (m, 1H), 2.44-2.40 (m, 1H), 2.33-2.28 (m, 1H), 2.17-2.09 (m, 1H), 2.07-2.00 (m, 2H), 1.97-1.94 (m, 1H), 1.66-1.40 (m, 6H), 1.10 (t,  $J=7.2\text{Hz}$ , 3H), 0.89 (s, 3H).  $^{13}\text{C}$  NMR (126 MHz,  $\text{CDCl}_3$ )  $\delta$  (ppm) 194.51, 179.11, 164.96, 154.16, 144.70, 139.41, 138.25, 136.71, 135.28, 132.70, 129.91, 127.12, 126.77, 125.68, 125.47, 124.01, 119.53, 105.32, 77.36, 61.56, 50.45, 47.79, 44.62, 37.83, 35.74, 31.49, 29.19, 26.24, 25.56, 21.52, 17.00, 13.76, 13.67. HRMS (ESI,  $m/z$ ) calcd for  $\text{C}_{34}\text{H}_{35}\text{NO}_5$   $[\text{M}+\text{Na}]^+$  560.2408, found 560.2418.

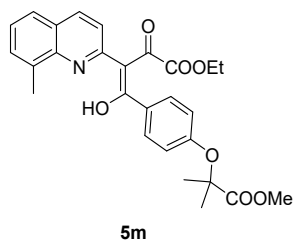

**5m**, yellow oil, 80% yield,  $^1\text{H}$  NMR (500 MHz,  $\text{CDCl}_3$ )  $\delta$  (ppm) 7.95 (d,  $J=9.4\text{Hz}$ , 1H), 7.78 (d,  $J=8.4\text{Hz}$ , 2H), 7.56-7.49 (m, 3H), 7.73 (t,  $J=7.6\text{Hz}$ , 1H), 6.77 (d,  $J=8.8\text{Hz}$ , 2H), 3.93 (q,  $J=7.1\text{Hz}$ , 2H), 3.73 (s, 3H), 2.71 (s, 3H), 1.61 (s, 6H), 1.11 (t,  $J=7.2\text{Hz}$ , 3H).  $^{13}\text{C}$  NMR (126 MHz,  $\text{CDCl}_3$ )  $\delta$  (ppm) 193.64, 179.01, 174.28, 165.06, 159.37, 154.27, 139.47, 135.49, 134.47, 132.81, 131.26, 127.33, 125.77, 124.15, 119.69, 117.62, 105.35, 79.36, 61.73, 52.68, 25.44, 17.15, 13.80. HRMS (ESI,  $m/z$ ) calcd for  $\text{C}_{27}\text{H}_{27}\text{NO}_7$   $[\text{M}+\text{Na}]^+$  500.1680, found 500.1695.

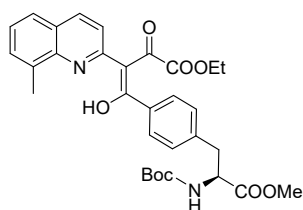

**5n**

**5n**, yellow oil, 75% yield,  $^1\text{H}$  NMR (500 MHz,  $\text{CDCl}_3$ )  $\delta$  (ppm) 7.97 (d,  $J=9.4\text{Hz}$ , 1H), 7.78 (d,  $J=7.8\text{Hz}$ , 2H), 7.57-7.52 (m, 3H), 7.38 (t,  $J=7.6\text{Hz}$ , 1H), 7.16 (d,  $J=7.9\text{Hz}$ , 2H), 5.00 (d,  $J=8.2\text{Hz}$ , 1H), 4.56 (q,  $J=6.0\text{Hz}$ , 1H), 3.87 (q,  $J=7.3\text{Hz}$ , 2H), 3.69 (s, 3H), 3.17-3.05 (m, 2H), 2.72 (s, 3H), 1.40 (s, 9H), 1.11 (t,  $J=7.2\text{Hz}$ , 3H).  $^{13}\text{C}$  NMR (126 MHz,  $\text{CDCl}_3$ )  $\delta$  (ppm) 194.38, 179.66, 171.99, 165.04, 155.08, 154.38, 141.13, 139.74, 139.62, 135.43, 132.86, 129.64, 129.50, 127.34, 125.85, 125.78, 124.20, 119.67, 105.20, 80.14, 61.75, 54.37, 52.38, 38.28, 28.35, 17.13, 13.78. HRMS (ESI,  $m/z$ ) calcd for  $\text{C}_{31}\text{H}_{34}\text{N}_2\text{O}_8$   $[\text{M}+\text{Na}]^+$  585.2208, found 585.2222.

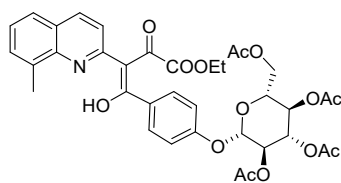

**5o**

**5o**, yellow oil, 78% yield,  $^1\text{H}$  NMR (500 MHz,  $\text{CDCl}_3$ )  $\delta$  (ppm) 7.95 (d,  $J=9.4\text{Hz}$ , 1H), 7.83 (d,  $J=8.3\text{Hz}$ , 2H), 7.56-7.35 (m, 4H), 6.96 (d,  $J=8.5\text{Hz}$ , 2H), 5.30-5.23 (m, 2H), 5.15-5.11 (m, 2H), 4.27-4.23 (m, 1H), 4.14-4.11 (m, 1H), 3.95-3.86 (m, 3H), 2.70 (s, 3H), 2.03-2.00 (m, 12H), 1.10 (t,  $J=7.2\text{Hz}$ , 3H).  $^{13}\text{C}$  NMR (126 MHz,  $\text{CDCl}_3$ )  $\delta$  (ppm) 193.43, 178.84, 170.49, 170.15, 169.39, 169.23, 164.98, 159.95, 154.14, 139.59, 135.93, 135.45, 132.86, 131.45, 127.32, 125.82, 125.78, 124.13, 119.54, 116.30, 105.23, 98.33, 72.63, 72.30, 71.12, 68.23, 61.94, 61.76, 20.70, 20.61, 20.59, 20.58, 17.10, 13.77. HRMS (ESI,  $m/z$ ) calcd for  $\text{C}_{36}\text{H}_{37}\text{NO}_{14}$   $[\text{M}+\text{Na}]^+$  730.2107, found 730.2121.

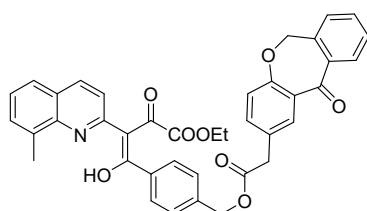

**5p**

**5p**, yellow oil, 87% yield,  $^1\text{H}$  NMR (500 MHz,  $\text{CDCl}_3$ )  $\delta$  (ppm) 8.12 (d,  $J=2.4\text{Hz}$ , 1H), 7.98 (d,  $J=9.4\text{Hz}$ , 1H), 7.88-7.84 (m, 3H), 7.59-7.52 (m, 4H), 7.46-7.33 (m, 6H), 7.02 (d,  $J=8.4\text{Hz}$ , 1H), 5.17 (s, 4H), 3.89 (q,  $J=7.3\text{Hz}$ , 2H), 3.70 (s, 2H), 2.75 (s, 3H), 1.10 (t,  $J=7.3\text{Hz}$ , 3H).  $^{13}\text{C}$  NMR (126 MHz,  $\text{CDCl}_3$ )  $\delta$  (ppm) 194.36, 190.82, 179.65, 171.12, 165.07, 160.66, 154.37, 140.72, 140.50, 140.33, 139.74, 136.36, 135.66, 135.52, 132.93, 132.89, 132.60, 129.72, 129.59, 129.37, 127.92, 127.88, 127.57, 127.44, 125.90, 125.84, 125.31, 124.27, 121.25, 119.70, 105.25, 73.75, 66.07, 61.85,

40.28, 17.20, 13.81. HRMS (ESI,  $m/z$ ) calcd for  $C_{39}H_{31}NO_8$   $[M+Na]^+$  664.1942, found 664.1962.

## 5. Synthetic applications

### 5.1. Synthesis of 6

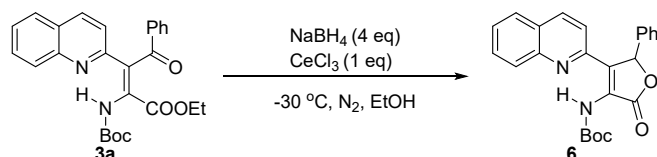

A solution of compound **3a** (0.20 mmol) in anhydrous EtOH (2 mL) was cooled to  $-30\text{ }^\circ\text{C}$ . To this solution were slowly added  $NaBH_4$  (0.80 mmol) and  $CeCl_3$  (0.20 mmol). The resulting mixture was stirred at this temperature for 4 h. The reaction was then quenched by the addition of water. The mixture was extracted with DCM ( $3 \times 5$  mL). The combined organic layers were dried over anhydrous  $Na_2SO_4$ , filtered and concentrated under reduced pressure. Purification by column chromatography on silica gel (eluent: petroleum ether/ethyl acetate = 4:1) afforded the desired product **6**.

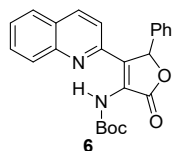

**6**, yellow solid, m.p.  $197.3\text{--}198.5\text{ }^\circ\text{C}$ , 72% yield,  $^1H$  NMR (500 MHz,  $CDCl_3$ )  $\delta$  (ppm) 8.77 (s, 1H), 8.03 (t,  $J=11.3\text{ Hz}$ , 2H), 7.75–7.71 (m, 2H), 7.54 (t,  $J=7.6\text{ Hz}$ , 1H), 7.40–7.38 (m, 2H), 7.31–7.30 (m, 3H), 7.21 (d,  $J=8.6\text{ Hz}$ , 1H), 6.48 (s, 1H), 1.48 (s, 9H).  $^{13}C$  NMR (126 MHz,  $CDCl_3$ )  $\delta$  (ppm) 168.23, 151.78, 150.69, 147.40, 138.21, 136.34, 135.57, 130.39, 129.64, 129.53, 129.07, 128.19, 127.76, 127.68, 127.36, 127.28, 120.60, 82.21, 82.06, 28.20. HRMS (ESI,  $m/z$ ) calcd for  $C_{24}H_{22}N_2O_4$   $[M+Na]^+$  425.1472, found 425.1483.

### 5.2. Synthesis of 7

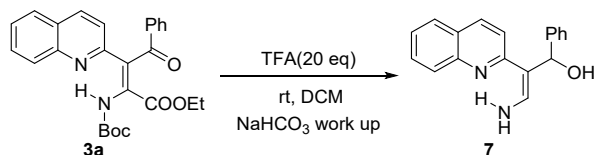

To a solution of compound **3a** (0.20 mmol) in DCM (2 mL) was slowly added trifluoroacetic acid (TFA, 4.0 mmol, 20 equiv) at room temperature. The mixture was stirred for 2 h. The reaction was quenched with saturated aqueous  $NaHCO_3$  solution. The mixture was extracted with DCM ( $3 \times 5$  mL). The combined organic layers were washed with brine, dried over anhydrous  $Na_2SO_4$ , filtered and concentrated under reduced pressure. Purification by silica gel column chromatography (petroleum ether/ethyl acetate = 1:1) afforded the desired product **7**.

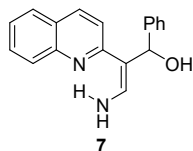

**7**, yellow solid, m.p. 127.8-128.5 °C, 94% yield, <sup>1</sup>H NMR (500 MHz, DMSO) δ (ppm) 8.46 (s, 0.7Hz), 8.31 (s, 0.3Hz), 8.12-8.10 (m, 2H), 7.79 (dd, *J*=8.0Hz, 1.4Hz, 1H), 7.72-7.69 (m, 1H), 7.59-7.58 (m, 2H), 7.50-7.47 (m, 2H), 7.39-7.32 (m, 3H), 7.21 (d, *J*=8.8Hz, 1H), 3.41 (s, 1H). <sup>13</sup>C NMR (126 MHz, DMSO) δ (ppm) 167.77, 153.33, 147.26, 139.86, 135.83, 129.93, 128.91, 128.56, 128.20, 127.71, 126.07, 125.81, 125.47, 119.57, 79.26. HRMS (ESI, *m/z*) calcd for C<sub>18</sub>H<sub>16</sub>N<sub>2</sub>O [M+Na]<sup>+</sup> 299.1155, found 299.1155.

### 5.3. Synthesis of **8a**

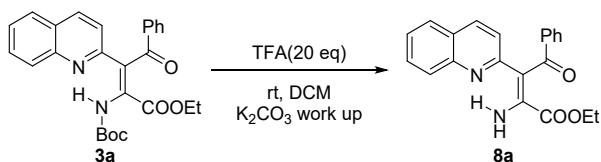

A solution of compound **3a** (0.20 mmol) in DCM (2 mL) was treated slowly with trifluoroacetic acid (TFA, 4.0 mmol, 20 equiv) at room temperature. After stirring for 2 h, the reaction was quenched with saturated aqueous K<sub>2</sub>CO<sub>3</sub> solution. The mixture was extracted with DCM (3 × 5 mL). The combined organic layers were washed with brine, dried over anhydrous Na<sub>2</sub>SO<sub>4</sub>, filtered and concentrated under reduced pressure. Purification by silica gel column chromatography (petroleum ether/ethyl acetate = 3:1) afforded the desired product **8a**.

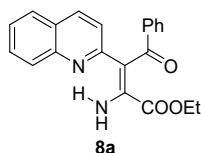

**8a**, yellow solid, m.p. 110.8-111.3 °C, 91% yield, <sup>1</sup>H NMR (500 MHz, CDCl<sub>3</sub>) δ (ppm) 8.03-7.98 (m, 3H), 7.88-7.87 (m, 1H), 7.69-7.66 (m, 2H), 7.53-7.50 (m, 1H), 7.47-7.40 (m, 3H), 7.10 (d, *J*=8.9Hz, 1H), 4.07 (q, *J*=7.2Hz, 2H), 1.03 (t, *J*=7.2Hz, 3H). <sup>13</sup>C NMR (126 MHz, CDCl<sub>3</sub>) δ (ppm) 197.42, 164.46, 156.66, 146.75, 140.01, 139.35, 135.71, 132.83, 129.22, 128.59, 128.07, 127.44, 125.94, 125.61, 121.13, 111.29, 62.41, 13.43. HRMS (ESI, *m/z*) calcd for C<sub>21</sub>H<sub>18</sub>N<sub>2</sub>O<sub>3</sub> [M+Na]<sup>+</sup> 369.1210, found 369.1197.

### 5.4. Synthesis of **9**

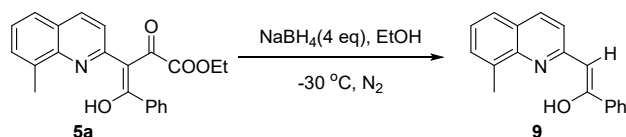

At  $-30\text{ }^{\circ}\text{C}$  under a nitrogen atmosphere,  $\text{NaBH}_4$  (0.40 mmol) was slowly added to a solution of **5a** (0.10 mmol) in EtOH (1 mL). The mixture was stirred at this temperature for 2 h. The reaction was quenched by adding water. The mixture was extracted with DCM ( $3 \times 5\text{ mL}$ ). The combined organic phases were dried over  $\text{Na}_2\text{SO}_4$ , filtered and concentrated under reduced pressure. Purification by column chromatography on silica gel (petroleum ether/ethyl acetate = 3:1) afforded product **9**.

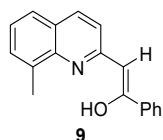

**9**, yellow oil, 83% yield,  $^1\text{H}$  NMR (500 MHz,  $\text{CDCl}_3$ )  $\delta$  (ppm) 19.97 (s, 1H), 7.99-7.97 (m, 2H), 7.69 (d,  $J=9.1\text{ Hz}$ , 1H), 7.45-7.41 (m, 5H), 7.20 (t,  $J=7.6\text{ Hz}$ , 1H), 6.90 (d,  $J=9.1\text{ Hz}$ , 1H), 6.15 (s, 1H), 2.70 (s, 3H).  $^{13}\text{C}$  NMR (126 MHz,  $\text{CDCl}_3$ )  $\delta$  (ppm) 184.19, 154.18, 140.10, 137.04, 136.88, 131.82, 130.45, 128.41, 126.87, 126.38, 125.57, 123.54, 123.38, 121.93, 90.22, 17.41. HRMS (ESI,  $m/z$ ) calcd for  $\text{C}_{18}\text{H}_{15}\text{NO}$   $[\text{M}+\text{H}]^+$  262.1227, found 262.1252.

## 5.5. Synthesis of 10

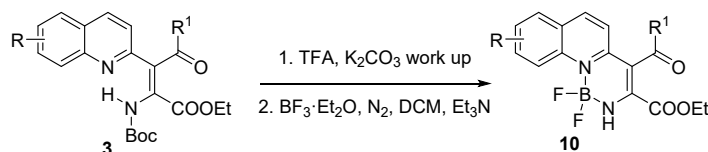

**10** was prepared from quinoline-enamine **3** (0.10 mmol) using a one-pot procedure. The crude **8** was used directly in the next step without purification. A solution of crude **8** in DCM (1.25 mL) was placed under a nitrogen atmosphere at room temperature. To this solution,  $\text{BF}_3 \cdot \text{Et}_2\text{O}$  (1.03 mmol) and  $\text{Et}_3\text{N}$  (1.05 mmol) were added dropwise sequentially. The mixture was stirred for 0.5 h, then quenched with water. The mixture was extracted with DCM ( $3 \times 5\text{ mL}$ ). The combined organic layers were dried over anhydrous  $\text{Na}_2\text{SO}_4$ , filtered and concentrated under reduced pressure. Purification by silica gel column chromatography (petroleum ether/DCM = 1:4) afforded the desired product **10**.

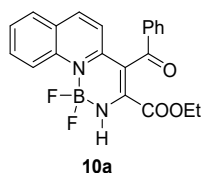

**10a**, yellow solid, m.p.  $122.8\text{--}123.8\text{ }^{\circ}\text{C}$ , 48% yield,  $^1\text{H}$  NMR (500 MHz,  $\text{CDCl}_3$ )  $\delta$  (ppm) 8.85 (d,  $J=8.9\text{ Hz}$ , 1H), 7.97-7.93 (m, 3H), 7.76-7.68 (m, 2H), 7.56-7.50 (m, 2H), 7.43 (t,  $J=7.6\text{ Hz}$ , 2H), 7.24 (d,  $J=4.6\text{ Hz}$ , 1H), 6.84 (s, 1H), 4.06 (q,  $J=6.9\text{ Hz}$ , 2H), 1.01 (t,  $J=7.0\text{ Hz}$ , 3H).  $^{13}\text{C}$  NMR (126 MHz,  $\text{CDCl}_3$ )  $\delta$  (ppm) 194.63, 162.20, 151.93, 144.93, 140.22, 139.16, 133.66, 132.23, 129.34, 129.04, 128.58, 126.96, 126.37,

123.65 (t,  $J=9.5\text{Hz}$ ), 119.90, 105.12, 63.52, 13.49. HRMS (ESI,  $m/z$ ) calcd for  $\text{C}_{21}\text{H}_{17}\text{BF}_2\text{N}_2\text{O}_3$   $[\text{M}+\text{Na}]^+$  417.1193, found 417.1207.

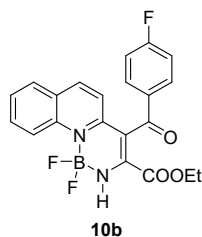

**10b**, yellow oil, 46% yield,  $^1\text{H}$  NMR (500 MHz,  $\text{CDCl}_3$ )  $\delta$  (ppm) 8.87 (d,  $J=8.7\text{Hz}$ , 1H), 8.01-7.98 (m, 3H), 7.80-7.72 (m, 2H), 7.55 (t,  $J=7.5\text{Hz}$ , 1H), 7.23 (d,  $J=9.1\text{Hz}$ , 1H), 7.13 (t,  $J=8.4\text{Hz}$ , 2H), 6.86 (s, 1H), 4.13 (q,  $J=7.1\text{Hz}$ , 2H), 1.09 (t,  $J=7.4\text{Hz}$ , 3H).  $^{13}\text{C}$  NMR (126 MHz,  $\text{CDCl}_3$ )  $\delta$  (ppm) 193.16, 166.15 (d,  $J=256.5\text{Hz}$ ), 162.03, 151.72, 144.69, 140.37, 140.16, 135.61 (d,  $J=2.9\text{Hz}$ ), 132.35, 131.97 (d,  $J=9.5\text{Hz}$ ), 128.62, 127.06, 126.37, 123.64 (t,  $J=8.8\text{Hz}$ ), 119.72, 116.21 (d,  $J=22.0\text{Hz}$ ), 104.89, 63.60, 13.60. HRMS (ESI,  $m/z$ ) calcd for  $\text{C}_{21}\text{H}_{16}\text{BF}_3\text{N}_2\text{O}_3$   $[\text{M}+\text{Na}]^+$  435.1099, found 435.1093.

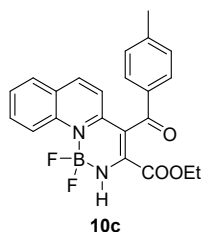

**10c**, yellow solid, m.p. 131.5-132.5 °C, 28% yield,  $^1\text{H}$  NMR (500 MHz,  $\text{CDCl}_3$ )  $\delta$  (ppm) 8.87 (d,  $J=9.1\text{Hz}$ , 1H), 7.97 (d,  $J=9.1\text{Hz}$ , 1H), 7.86 (d,  $J=8.1\text{Hz}$ , 2H), 7.79-7.76 (m, 1H), 7.72-7.70 (m, 1H), 7.54 (t,  $J=7.6\text{Hz}$ , 1H), 7.25 (d,  $J=7.1\text{Hz}$ , 3H), 6.85 (s, 1H), 4.10 (q,  $J=7.2\text{Hz}$ , 2H), 2.41 (s, 3H), 1.06 (t,  $J=7.1\text{Hz}$ , 3H).  $^{13}\text{C}$  NMR (126 MHz,  $\text{CDCl}_3$ )  $\delta$  (ppm) 194.34, 162.22, 151.96, 144.71, 144.63, 140.13, 136.67, 132.20, 129.75, 129.51, 128.57, 126.92, 126.35, 123.62 (t,  $J=9.4\text{Hz}$ ), 120.00, 105.39, 63.49, 21.86, 13.54. HRMS (ESI,  $m/z$ ) calcd for  $\text{C}_{22}\text{H}_{19}\text{BF}_2\text{N}_2\text{O}_3$   $[\text{M}+\text{Na}]^+$  431.1349, found 431.1358.

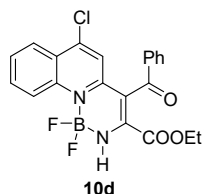

**10d**, yellow solid, m.p. 150.8-151.8 °C, 40% yield,  $^1\text{H}$  NMR (500 MHz,  $\text{CDCl}_3$ )  $\delta$  (ppm) 8.90 (d,  $J=9.3\text{Hz}$ , 1H), 8.17 (d,  $J=8.1\text{Hz}$ , 1H), 7.95 (d,  $J=7.2\text{Hz}$ , 2H), 7.83 (t,  $J=8.0\text{Hz}$ , 1H), 7.64-7.58 (m, 2H), 7.49-7.46 (m, 3H), 6.94 (s, 1H), 4.06 (q,  $J=7.2\text{Hz}$ , 2H), 1.03 (t,  $J=7.2\text{Hz}$ , 3H).  $^{13}\text{C}$  NMR (126 MHz,  $\text{CDCl}_3$ )  $\delta$  (ppm) 194.15, 162.00, 151.53, 146.65, 146.00, 140.92, 139.16, 133.81, 133.04, 129.31, 129.11, 127.53, 125.21, 124.50, 123.86 (t,  $J=9.7\text{Hz}$ ), 119.55, 104.25, 63.70, 13.47. HRMS (ESI,  $m/z$ ) calcd for  $\text{C}_{21}\text{H}_{16}\text{BClF}_2\text{N}_2\text{O}_3$   $[\text{M}+\text{Na}]^+$  451.0803, found 451.0809.

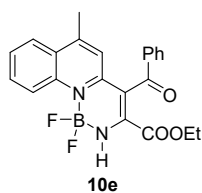

**10e**, yellow solid, m.p. 133.3-134.3 °C, 56% yield,  $^1\text{H}$  NMR (500 MHz,  $\text{CDCl}_3$ )  $\delta$  (ppm) 8.91 (d,  $J=9.0\text{Hz}$ , 1H), 7.98-7.96 (m, 2H), 7.89 (dd,  $J=8.3\text{Hz}$ , 1.6Hz, 1H), 7.79-7.75 (m, 1H), 7.59-7.55 (m, 2H), 7.46 (t,  $J=7.6\text{Hz}$ , 2H), 7.14 (s, 1H), 6.76 (s, 1H), 4.07 (q,  $J=7.2\text{Hz}$ , 2H), 2.58 (s, 3H), 1.04 (t,  $J=7.2\text{Hz}$ , 3H).  $^{13}\text{C}$  NMR (126 MHz,  $\text{CDCl}_3$ )  $\delta$  (ppm) 194.93, 162.28, 151.31, 149.19, 144.61, 139.89, 139.33, 133.60, 131.80, 129.18 (d,  $J=40.4\text{Hz}$ ), 126.78, 126.60, 124.48, 124.05 (t,  $J=9.6\text{Hz}$ ), 120.03, 104.78, 63.43, 19.89, 13.53.  $^{11}\text{B}$  NMR (160 MHz,  $\text{CDCl}_3$ )  $\delta$  (ppm) 2.73 (t,  $J=32.6\text{Hz}$ ).  $^{19}\text{F}$  NMR (471 MHz,  $\text{CDCl}_3$ )  $\delta$  (ppm) -120.67 (dd,  $J=65.52\text{Hz}$ , 30.5Hz). HRMS (ESI, m/z) calcd for  $\text{C}_{22}\text{H}_{19}\text{BF}_2\text{N}_2\text{O}_3$  [ $\text{M}+\text{Na}$ ] $^+$  431.1349, found 431.1363.

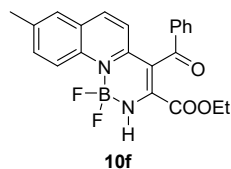

**10f**, yellow oil, 46% yield,  $^1\text{H}$  NMR (500 MHz,  $\text{CDCl}_3$ )  $\delta$  (ppm) 8.76 (d,  $J=9.3\text{Hz}$ , 1H), 7.96 (d,  $J=7.3\text{Hz}$ , 2H), 7.92 (d,  $J=9.1\text{Hz}$ , 1H), 7.61-7.56 (m, 2H), 7.49-7.45 (m, 3H), 7.24 (d,  $J=9.3\text{Hz}$ , 1H), 6.78 (s, 1H), 4.08 (q,  $J=7.1\text{Hz}$ , 2H), 2.50 (s, 3H), 1.03 (t,  $J=7.2\text{Hz}$ , 3H).  $^{13}\text{C}$  NMR (126 MHz,  $\text{CDCl}_3$ )  $\delta$  (ppm) 194.76, 162.29, 151.17, 144.29, 139.84, 139.17, 138.43, 137.23, 134.13, 133.61, 129.34, 129.01, 127.67, 126.56, 123.39 (t,  $J=9.3\text{Hz}$ ), 119.83, 105.14, 63.43, 21.14, 13.50. HRMS (ESI, m/z) calcd for  $\text{C}_{22}\text{H}_{19}\text{BF}_2\text{N}_2\text{O}_3$  [ $\text{M}+\text{Na}$ ] $^+$  431.1349, found 431.1354.

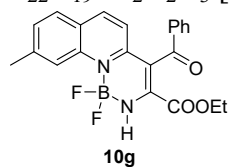

**10g**, yellow solid, m.p. 148.3-149.3 °C, 34% yield,  $^1\text{H}$  NMR (500 MHz,  $\text{CDCl}_3$ )  $\delta$  (ppm) 8.66 (s, 1H), 7.97-7.93 (m, 3H), 7.62-7.55 (m, 2H), 7.45 (t,  $J=7.6\text{Hz}$ , 2H), 7.37 (d,  $J=8.1\text{Hz}$ , 1H), 7.19 (d,  $J=9.1\text{Hz}$ , 1H), 6.79 (s, 1H), 4.09 (q,  $J=7.2\text{Hz}$ , 2H), 2.61 (s, 3H), 1.04 (t,  $J=7.2\text{Hz}$ , 3H).  $^{13}\text{C}$  NMR (126 MHz,  $\text{CDCl}_3$ )  $\delta$  (ppm) 194.80, 162.28, 151.75, 144.40, 143.42, 140.37, 140.02, 139.14, 133.62, 129.34, 129.01, 128.94, 128.29, 124.56, 123.04 (t,  $J=9.16\text{Hz}$ ), 118.92, 105.17, 63.45, 22.87, 13.50. HRMS (ESI, m/z) calcd for  $\text{C}_{22}\text{H}_{19}\text{BF}_2\text{N}_2\text{O}_3$  [ $\text{M}+\text{Na}$ ] $^+$  431.1349, found 431.1350.

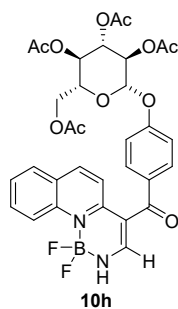

**10h**, yellow solid, m.p. 176.4-177.4 °C, 48% yield,  $^1\text{H}$  NMR (600 MHz,  $\text{CDCl}_3$ )  $\delta$  (ppm) 8.70 (d,  $J=8.9\text{Hz}$ , 1H), 8.10 (d,  $J=8.8\text{Hz}$ , 1H), 7.93 (d,  $J=8.9\text{Hz}$ , 2H), 7.79-7.76 (m, 1H), 7.72 (d,  $J=7.3\text{Hz}$ , 1H), 7.52 (t,  $J=7.7\text{Hz}$ , 1H), 7.19 (d,  $J=8.7\text{Hz}$ , 1H), 7.02 (d,  $J=8.9\text{Hz}$ , 2H), 6.31 (s, 1H), 5.34-5.28 (m, 2H), 5.18 (t,  $J=9.8\text{Hz}$ , 2H), 4.31-4.28 (m, 2H), 4.20-4.17 (m, 1H), 3.94-3.91 (m, 1H), 2.09-2.04 (m, 12H).  $^{13}\text{C}$  NMR (151 MHz,  $\text{CDCl}_3$ )  $\delta$  (ppm) 170.70, 170.32, 169.55, 169.43, 164.33, 159.36, 154.06, 141.28, 139.62, 132.51, 128.76, 128.62, 128.57, 126.70, 126.54, 122.95 (t,  $J=7.9\text{Hz}$ ), 121.25, 116.67, 98.51, 93.54, 72.76, 72.36, 71.22, 68.32, 62.05, 20.87, 20.77, 20.73, 20.71. HRMS (ESI, m/z) calcd for  $\text{C}_{32}\text{H}_{31}\text{BF}_2\text{N}_2\text{O}_{11}$   $[\text{M}+\text{H}]^+$  669.2062, found 669.2076.

## 5.6. Synthesis of 11

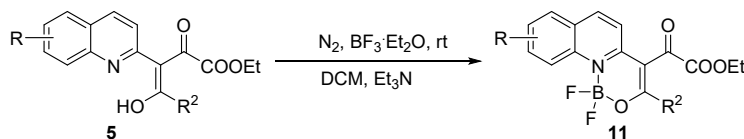

To a solution of compound **5** (0.10 mmol) in DCM (1.25 mL) under a nitrogen atmosphere at room temperature were slowly added  $\text{BF}_3 \cdot \text{Et}_2\text{O}$  (1.03 mmol) and  $\text{Et}_3\text{N}$  (1.05 mmol). The mixture was stirred for 0.5 h. The reaction was quenched with water and extracted with DCM ( $3 \times 5$  mL). The combined organic layers were dried over anhydrous  $\text{Na}_2\text{SO}_4$ , filtered and concentrated under reduced pressure. Purification by silica gel column chromatography (petroleum ether/DCM = 1:4) afforded the desired product **11**.

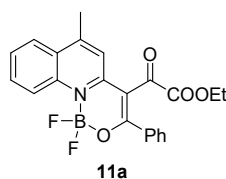

**11a**, yellow oil, 83% yield,  $^1\text{H}$  NMR (500 MHz,  $\text{CDCl}_3$ )  $\delta$  (ppm) 8.91 (d,  $J=8.7\text{Hz}$ , 1H), 8.03-8.00 (m, 3H), 7.89 (t,  $J=8.6\text{Hz}$ , 1H), 7.70 (t,  $J=7.7\text{Hz}$ , 1H), 7.61 (t,  $J=7.5\text{Hz}$ , 1H), 7.48 (t,  $J=9.6\text{Hz}$ , 2H), 7.14 (s, 1H), 4.16 (q,  $J=7.1\text{Hz}$ , 2H), 2.69 (s, 3H), 1.71 (t,  $J=7.1\text{Hz}$ , 3H).  $^{13}\text{C}$  NMR (126 MHz,  $\text{CDCl}_3$ )  $\delta$  (ppm) 192.53, 161.93, 153.36, 150.76, 149.92, 139.77, 137.87, 134.13, 133.14, 129.23, 129.16, 128.30, 127.95, 124.68, 124.56 (t,  $J=8.74\text{Hz}$ ), 119.77, 114.14, 62.91, 20.10, 13.84.  $^{11}\text{B}$  NMR (160 MHz,  $\text{CDCl}_3$ )  $\delta$  (ppm) 1.94 (t,  $J=17.7\text{Hz}$ ).  $^{19}\text{F}$  NMR (471 MHz,  $\text{CDCl}_3$ )  $\delta$  (ppm) -127.69 (dd,  $J=33.7\text{Hz}$ , 14.3Hz). HRMS (ESI, m/z) calcd for  $\text{C}_{22}\text{H}_{18}\text{BF}_2\text{N}_2\text{O}_4$   $[\text{M}+\text{Na}]^+$  432.1190, found 432.1205.

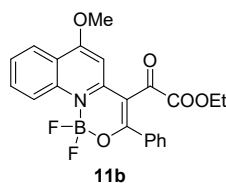

**11b**, yellow oil, 85% yield,  $^1\text{H}$  NMR (500 MHz,  $\text{CDCl}_3$ )  $\delta$  (ppm) 8.80 (d,  $J=8.9\text{Hz}$ , 1H), 8.20 (d,  $J=8.3\text{Hz}$ , 1H), 8.00 (d,  $J=7.8\text{Hz}$ , 2H), 7.86 (t,  $J=7.9\text{Hz}$ , 1H), 7.60 (q,  $J=7.8\text{Hz}$ , 2H), 7.47 (t,  $J=7.6\text{Hz}$ , 2H), 7.47 (t,  $J=7.6\text{Hz}$ , 2H), 6.60 (s, 1H), 4.15 (q,  $J=7.1\text{Hz}$ , 2H), 3.95 (s, 3H), 1.17 (t,  $J=7.2\text{Hz}$ , 3H).  $^{13}\text{C}$  NMR (126 MHz,  $\text{CDCl}_3$ )  $\delta$  (ppm) 192.89, 166.08, 162.09, 152.26, 150.93, 141.32, 138.00, 134.06, 133.47, 129.17, 129.14, 127.53, 123.82 (t,  $J=8.6\text{Hz}$ ), 122.55, 120.87, 114.08, 97.56, 62.88, 56.99, 13.84. HRMS (ESI,  $m/z$ ) calcd for  $\text{C}_{22}\text{H}_{18}\text{BF}_2\text{N}_2\text{O}_5$   $[\text{M}+\text{Na}]^+$  448.1139, found 448.1158.

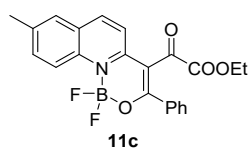

**11c**, yellow oil, 75% yield,  $^1\text{H}$  NMR (500 MHz,  $\text{CDCl}_3$ )  $\delta$  (ppm) 8.76 (d,  $J=9.4\text{Hz}$ , 1H), 8.23 (d,  $J=8.9\text{Hz}$ , 1H), 7.98 (d,  $J=7.4\text{Hz}$ , 2H), 7.72 (d,  $J=9.1\text{Hz}$ , 1H), 7.63-7.58 (m, 2H), 7.46 (t,  $J=7.7\text{Hz}$ , 2H), 7.23 (d,  $J=8.9\text{Hz}$ , 1H), 4.16 (q,  $J=7.2\text{Hz}$ , 2H), 2.54 (s, 3H), 1.16 (t,  $J=7.1\text{Hz}$ , 3H).  $^{13}\text{C}$  NMR (126 MHz,  $\text{CDCl}_3$ )  $\delta$  192.35, 161.89, 150.29, 149.70, 142.77, 139.19, 138.53, 137.69, 135.76, 134.13, 129.19, 129.13, 128.25, 127.68, 123.68 (t,  $J=8.5\text{Hz}$ ), 119.23, 114.39, 62.86, 21.31, 13.78. HRMS (ESI,  $m/z$ ) calcd for  $\text{C}_{22}\text{H}_{18}\text{BF}_2\text{NO}_4$   $[\text{M}+\text{Na}]^+$  432.1190, found 432.1200.

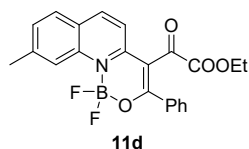

**11d**, yellow oil, 73% yield,  $^1\text{H}$  NMR (500 MHz,  $\text{CDCl}_3$ )  $\delta$  (ppm) 8.66 (s, 1H), 8.26 (d,  $J=8.8\text{Hz}$ , 1H), 7.99 (d,  $J=8.2\text{Hz}$ , 2H), 7.75 (d,  $J=8.3\text{Hz}$ , 1H), 7.59 (t,  $J=7.4\text{Hz}$ , 1H), 7.52 (d,  $J=8.2\text{Hz}$ , 1H), 7.46 (t,  $J=7.7\text{Hz}$ , 2H), 7.20 (d,  $J=8.8\text{Hz}$ , 1H), 4.17 (q,  $J=7.1\text{Hz}$ , 2H), 2.64 (s, 3H), 1.17 (t,  $J=7.2\text{Hz}$ , 3H).  $^{13}\text{C}$  NMR (126 MHz,  $\text{CDCl}_3$ )  $\delta$  (ppm) 192.41, 161.92, 150.48, 150.44, 145.35, 143.03, 140.47, 137.72, 134.14, 130.73, 129.23, 129.16, 128.50, 126.39, 123.18 (t,  $J=8.4\text{Hz}$ ), 118.37, 114.45, 62.92, 22.9519, 13.82. HRMS (ESI,  $m/z$ ) calcd for  $\text{C}_{22}\text{H}_{18}\text{BF}_2\text{NO}_4$   $[\text{M}+\text{Na}]^+$  432.1190, found 432.1202.

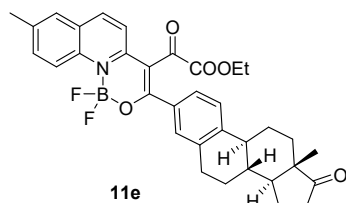

**11e**, yellow solid, m.p. 168.4-169.4  $^\circ\text{C}$ , 63% yield,  $^1\text{H}$  NMR (600 MHz,  $\text{CDCl}_3$ )  $\delta$  (ppm) 8.80 (d,  $J=9.3\text{Hz}$ , 1H), 8.21 (d,  $J=8.9\text{Hz}$ , 1H), 7.76-7.74 (m, 3H), 7.63 (s, 1H), 7.38 (d,  $J=8.3\text{Hz}$ , 1H), 7.24 (d,  $J=8.9\text{Hz}$ , 1H), 4.22 (q,  $J=7.1\text{Hz}$ , 2H), 2.94-2.91 (m,

2H), 2.56(s, 3H), 2.53-2.49 (m, 1H), 2.44-2.41 (m, 1H), 2.35-2.30 (m, 1H), 2.18-2.12 (m, 1H), 2.09-2.02 (m, 2H), 1.99-1.96 (m, 1H), 1.65-1.48 (m, 6H), 1.23 (t,  $J=7.14\text{Hz}$ , 3H), 0.90 (s, 1H).  $^{13}\text{C}$  NMR (151 MHz,  $\text{CDCl}_3$ )  $\delta$  (ppm) 192.28, 162.12, 149.96, 146.89, 142.64, 139.21, 138.65, 137.74, 135.83, 135.37, 129.70, 128.31, 127.65, 126.80, 126.28, 123.88 (t,  $J=8.7\text{Hz}$ ), 119.46, 114.76, 62.94, 50.66, 47.98, 45.01, 37.84, 35.93, 31.65, 29.44, 26.33, 25.62, 21.71, 21.41, 13.98, 13.93. HRMS (ESI,  $m/z$ ) calcd for  $\text{C}_{34}\text{H}_{34}\text{BF}_2\text{NO}_5$   $[\text{M}+\text{H}]^+$  586.2571, found 586.2575.

## 6. Gram scale experiments

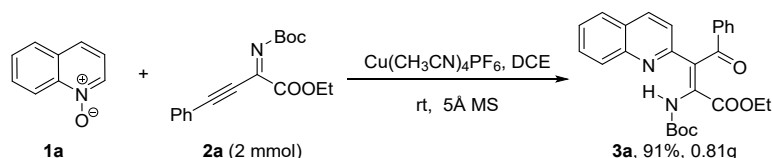

A mixture of quinoline N-oxides **1a** (2.4 mmol), alkynyl imines **2a** (2.0 mmol),  $\text{Cu}(\text{CH}_3\text{CN})_4\text{PF}_6$  (0.10 mmol, 5 mol%), and 5 Å molecular sieves (1.0 g) in anhydrous DCE (20 mL) was stirred under a nitrogen atmosphere at room temperature for 5 min. After the reaction was complete, the mixture was filtered, and the filtrate was concentrated under reduced pressure. Purification by column chromatography on silica gel (eluent: petroleum ether/ethyl acetate = 10:1 to 4:1) afforded the desired product **3a** (0.81 g, 91% yield).

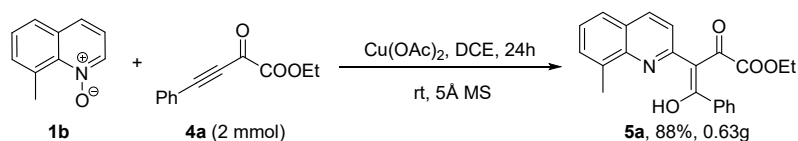

A mixture of quinoline N-oxides **1b** (2.4 mmol), ynones **4a** (2.0 mmol),  $\text{Cu}(\text{OAc})_2$  (0.10 mmol, 5 mol%), and 5 Å molecular sieves (1.0 g) in anhydrous DCE (20 mL) was stirred under a nitrogen atmosphere at room temperature. After the reaction was complete, the mixture was filtered, and the filtrate was concentrated under reduced pressure. Purification by column chromatography on silica gel (eluent: petroleum ether/ethyl acetate = 4:1 to 1:1) afforded the desired product **5a** (0.63 g, 88% yield).

## 7. Reference

- [1] J. Wu and Z. Xia, *Adv. Synth. Catal.* 2023, **365**, 3335– 3341  
 [2] J. Yang, Z. Wang, Z. He, G. Li, L. Hong, W. Sun and R. Wang, *Angew. Chem. Int. Ed.* 2020, **59**, 642 – 647.

## 8. X-ray crystallography

The crystal of **3aa** suitable for XRD analysis was prepared by recrystallization from a mixed solvent of DCM and n-hexane. CCDC 2520456 (**3aa**) contain the supplementary crystallographic data for this paper. These data can be obtained free of charge from The Cambridge Crystallographic Data Centre via [www.ccdc.cam.ac.uk/data\\_request/cif](http://www.ccdc.cam.ac.uk/data_request/cif).

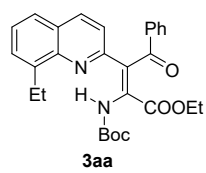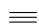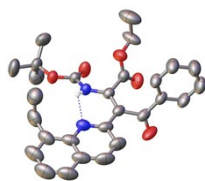

CCDC 2520456

## 9. NMR and HRMS spectra of all compounds

### 3a

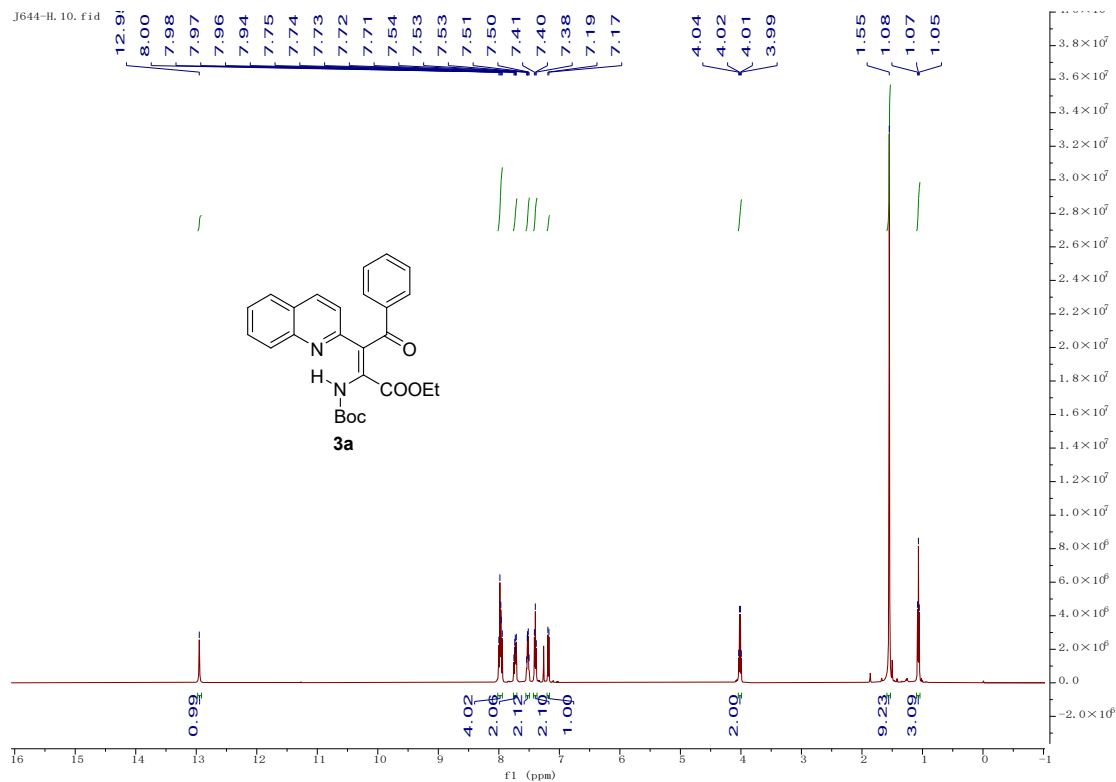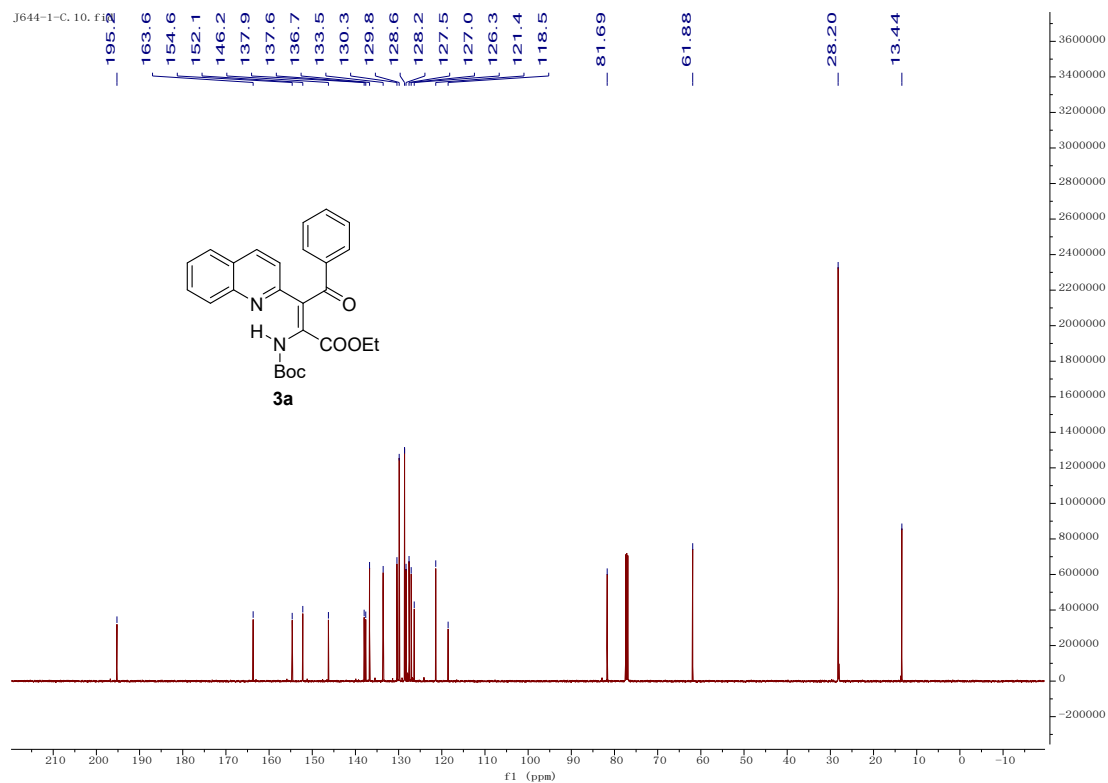

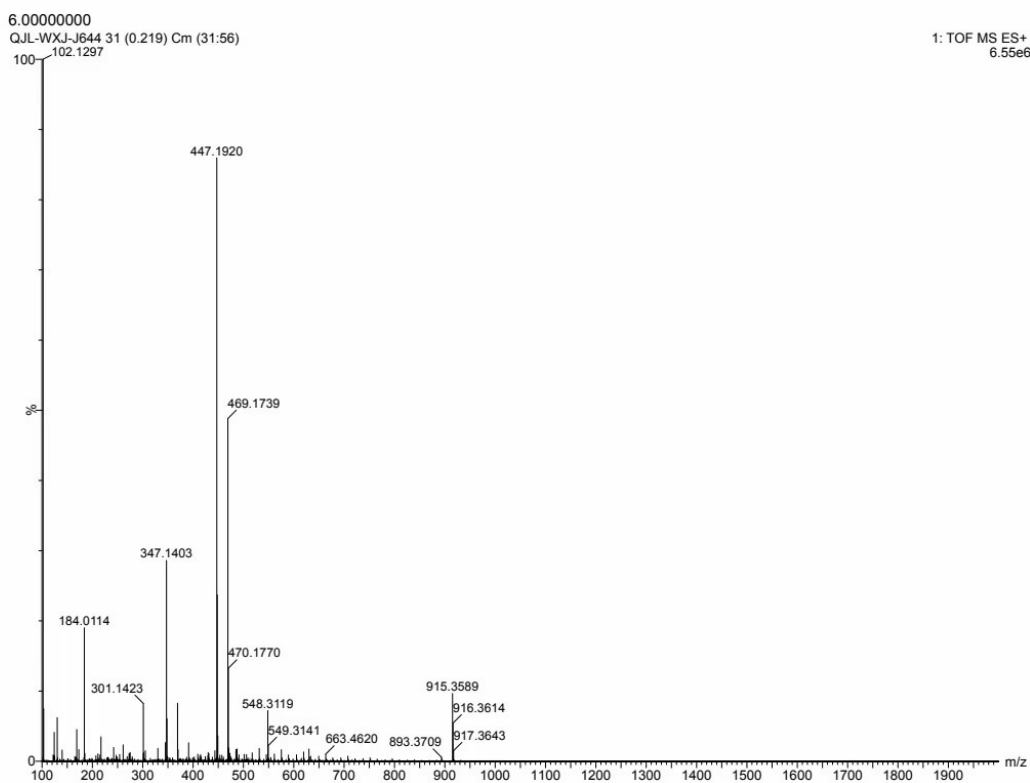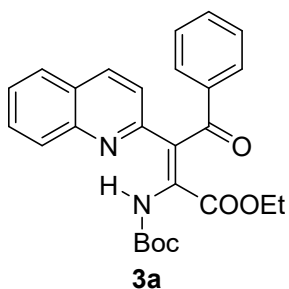

Chemical Formula:  $C_{26}H_{26}N_2O_5$

Exact Mass: 446.1842

Molecular Weight: 446.5030

m/z: 446.1842 (100.0%), 447.1875 (28.1%), 448.1909 (3.8%), 448.1884 (1.0%)

Elemental Analysis: C, 69.94; H, 5.87; N, 6.27; O, 17.92

HRMS (ESI, m/z) calcd for  $C_{26}H_{26}N_2O_5$   $[M+H]^+$  447.1915, found 447.1920.

3b

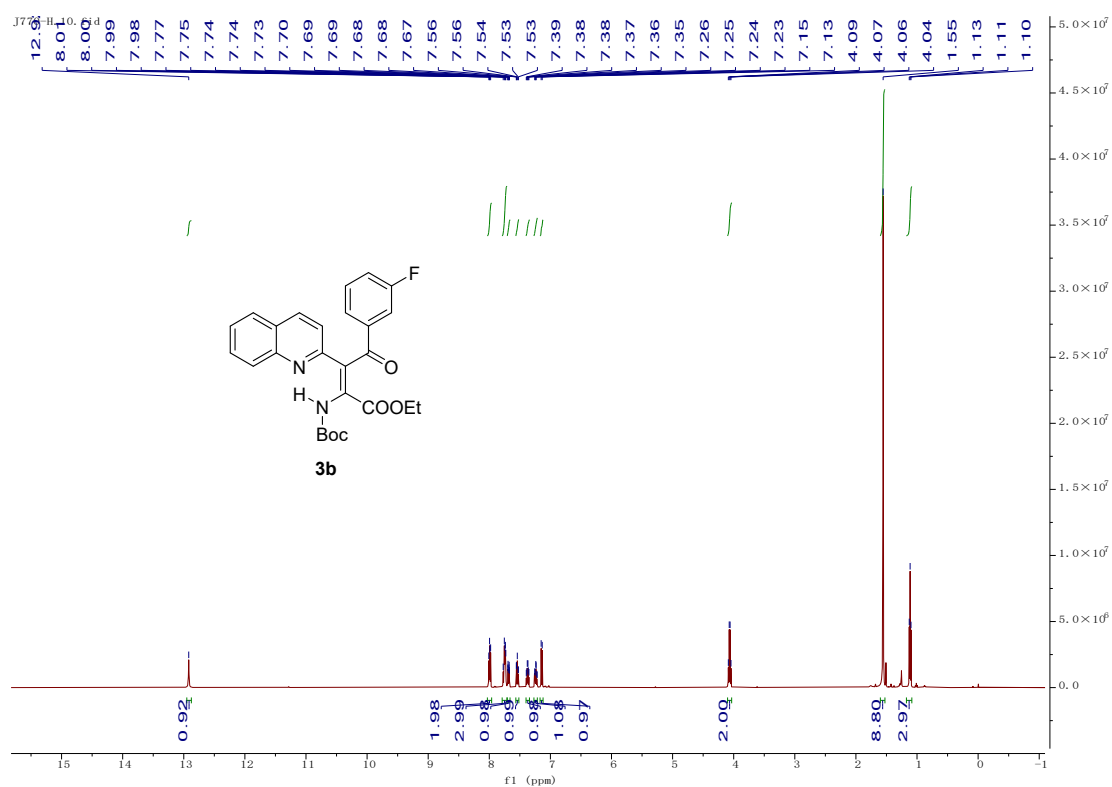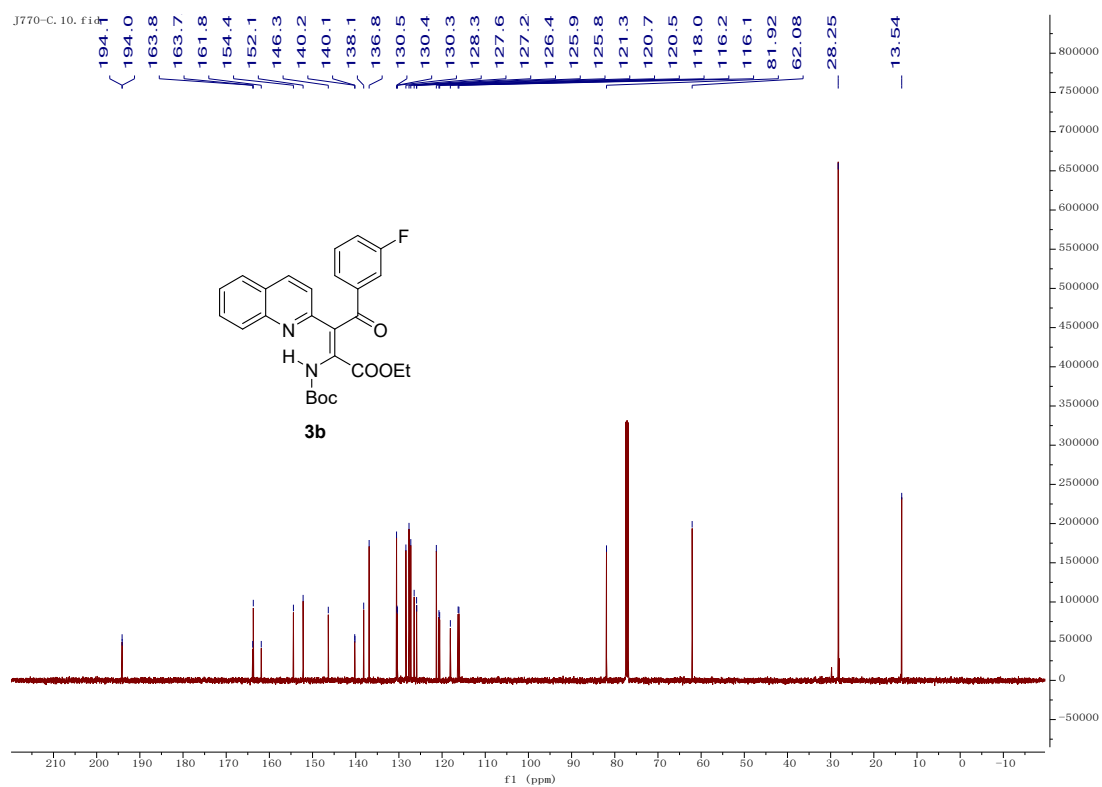

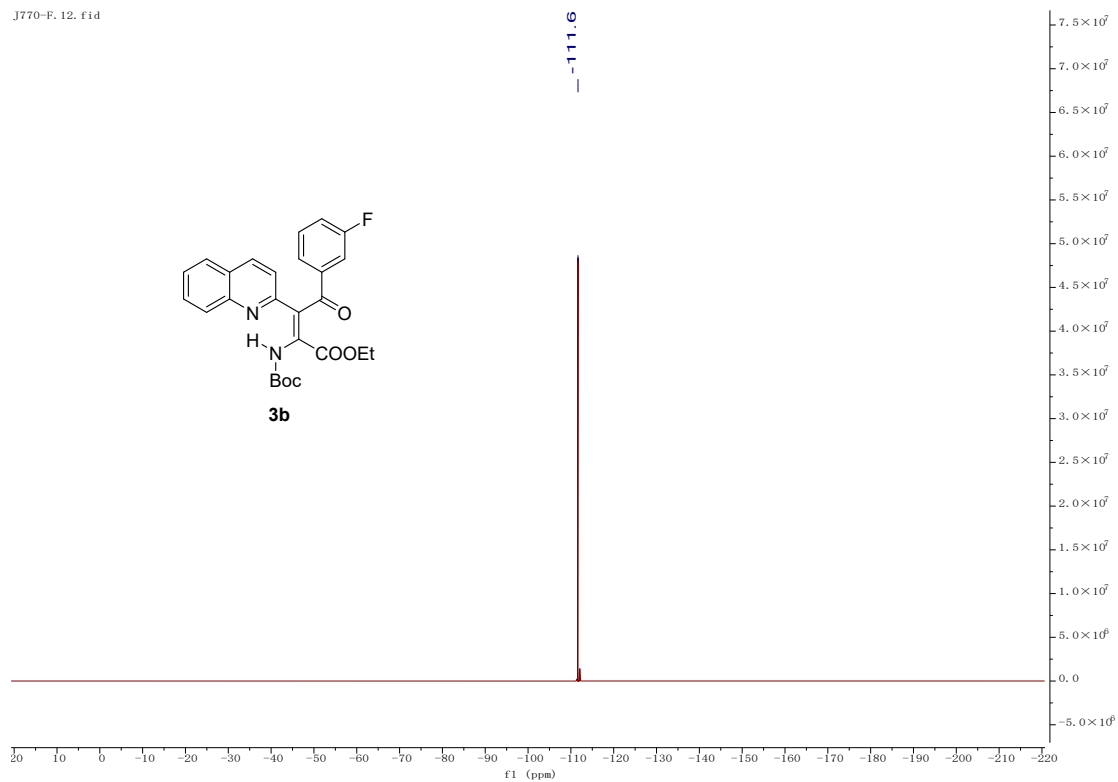

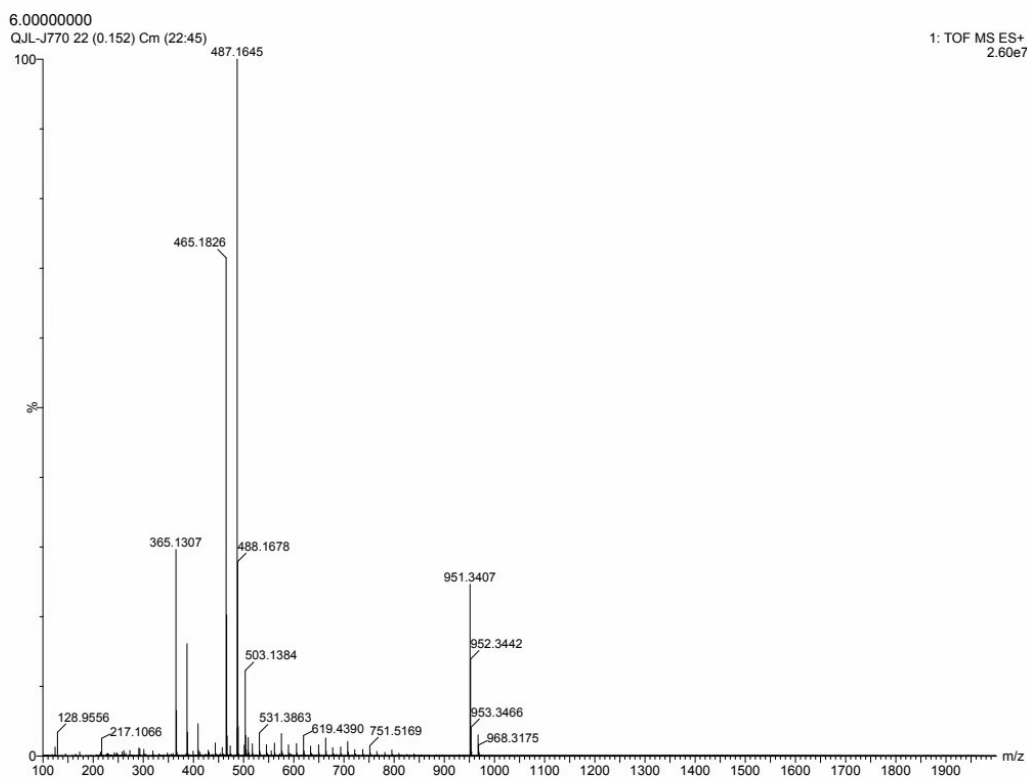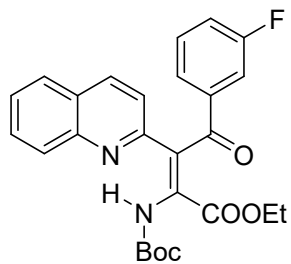

**3b**

Chemical Formula:  $C_{26}H_{25}FN_2O_5$

Exact Mass: 464.1748

Molecular Weight: 464.4934

m/z: 464.1748 (100.0%), 465.1781 (28.1%), 466.1815 (3.8%), 466.1790 (1.0%)

Elemental Analysis: C, 67.23; H, 5.43; F, 4.09; N, 6.03; O, 17.22

HRMS (ESI, m/z) calcd for  $C_{26}H_{25}FN_2O_5$   $[M+Na]^+$  487.1640, found 487.1645.

# 3c

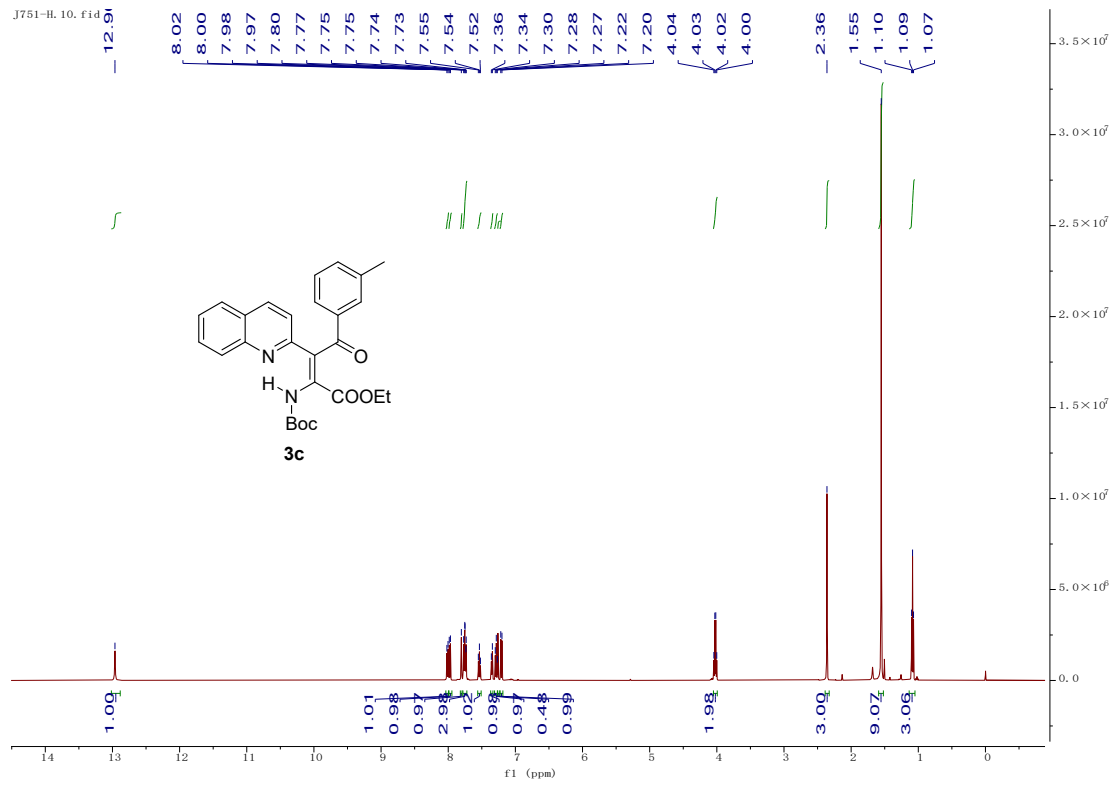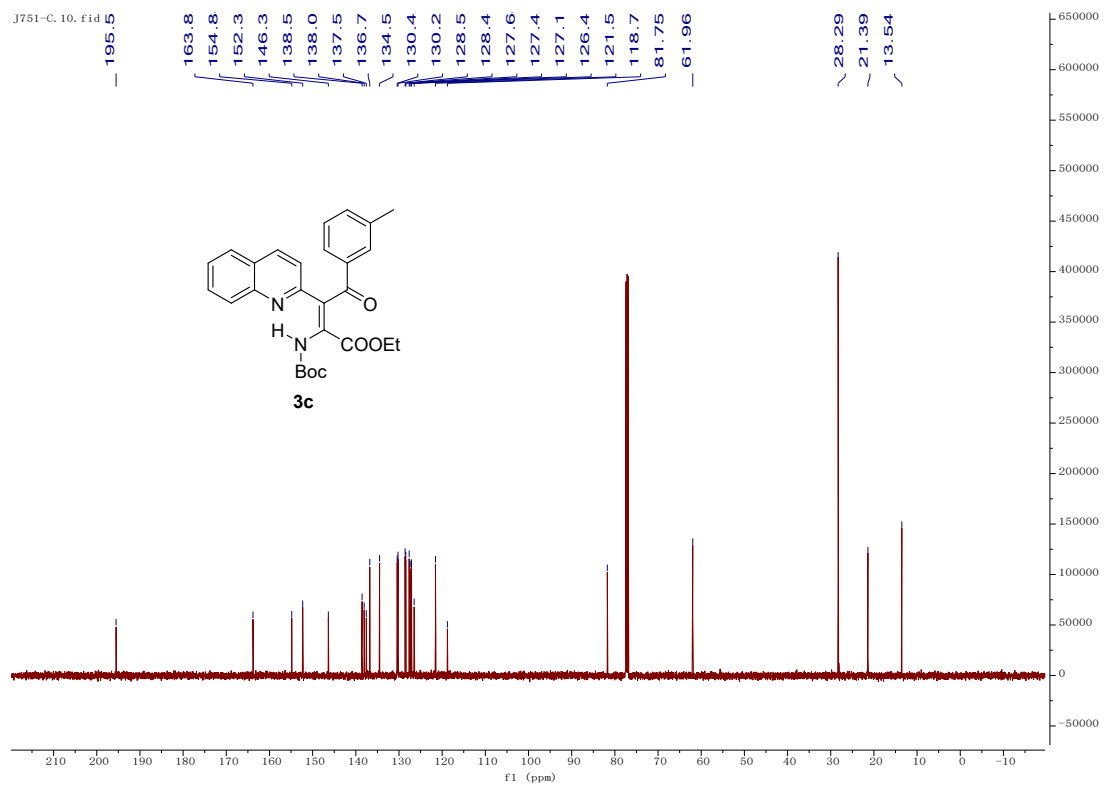

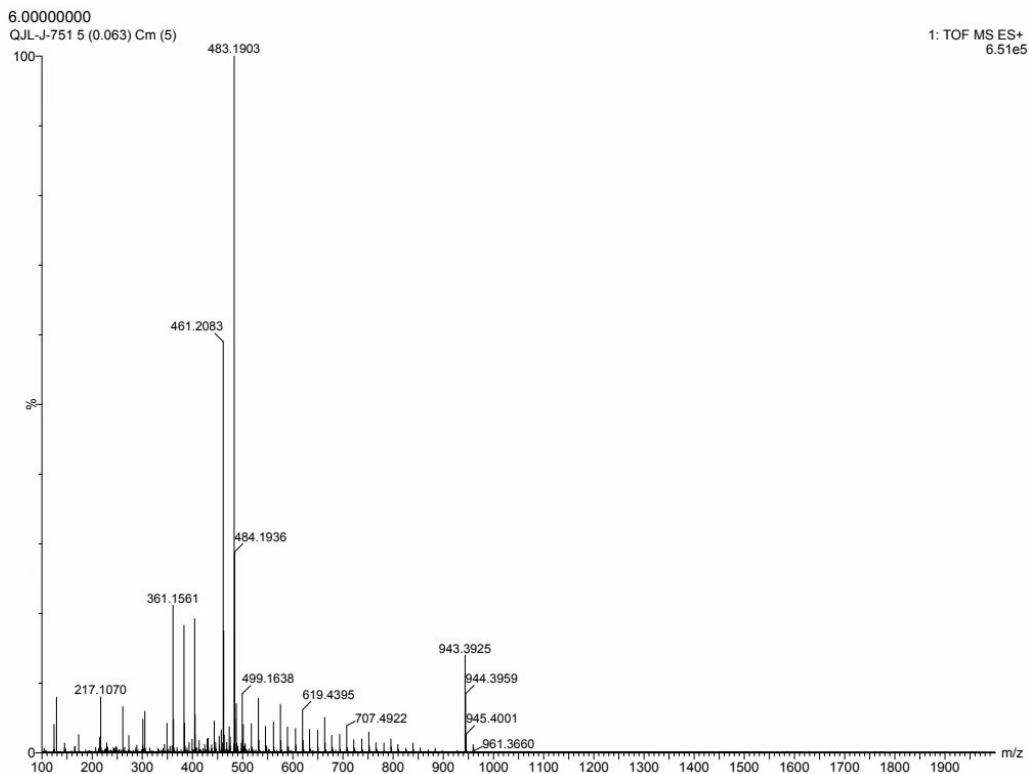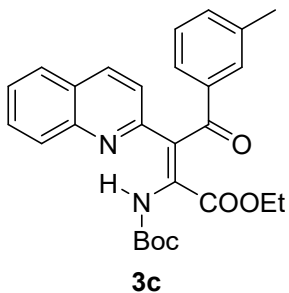

Chemical Formula:  $C_{27}H_{28}N_2O_5$

Exact Mass: 460.1998

Molecular Weight: 460.5300

m/z: 460.1998 (100.0%), 461.2032 (29.2%), 462.2065 (4.1%), 462.2041 (1.0%)

Elemental Analysis: C, 70.42; H, 6.13; N, 6.08; O, 17.37

HRMS (ESI, m/z) calcd for  $C_{27}H_{28}N_2O_5$   $[M+Na]^+$  483.1891, found 483.1903.

# 3d

J769-HL10.fid

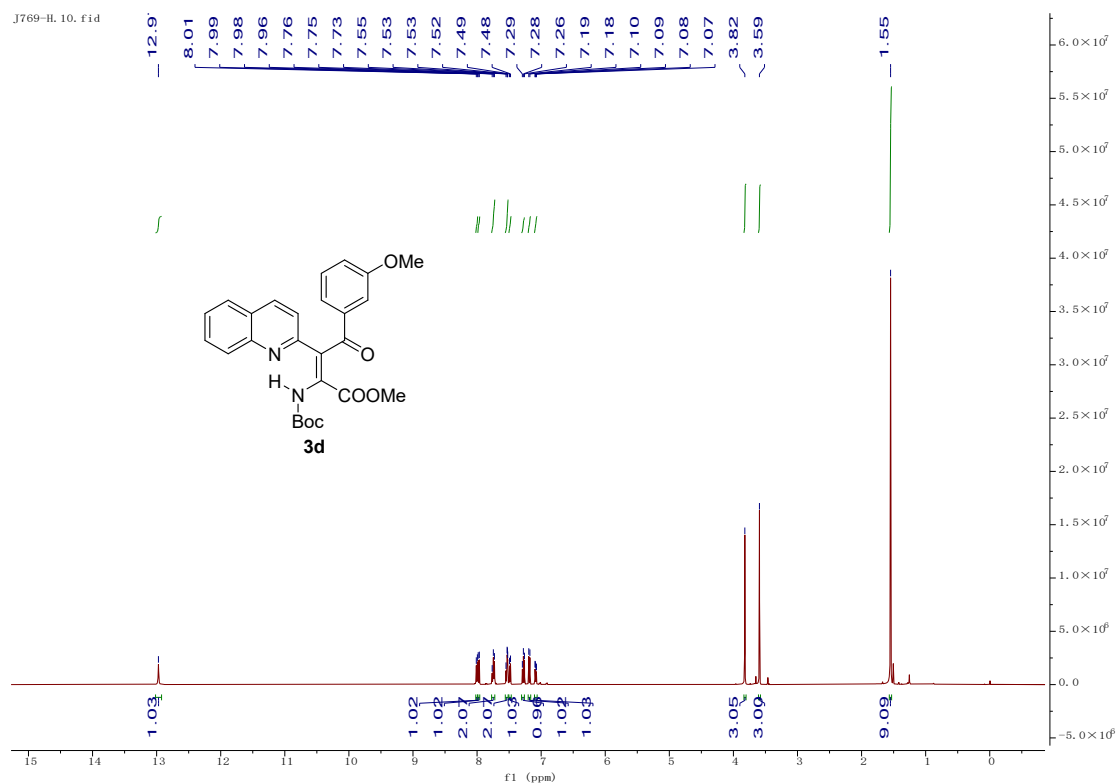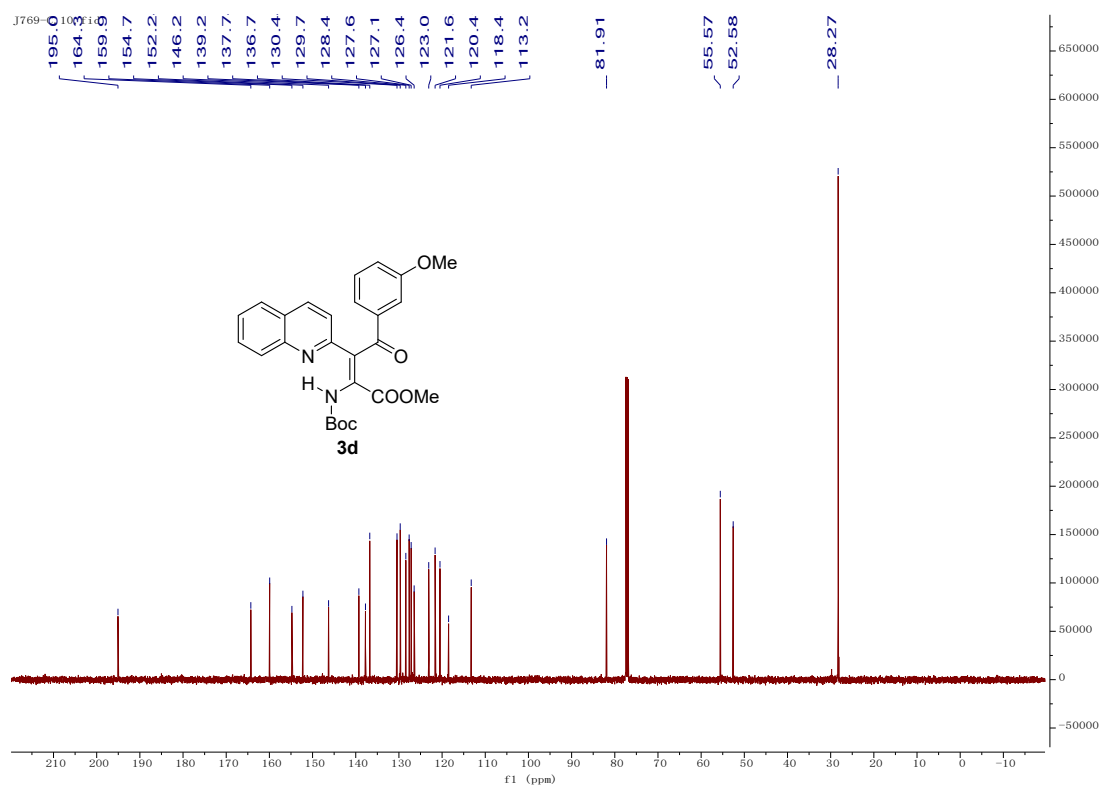

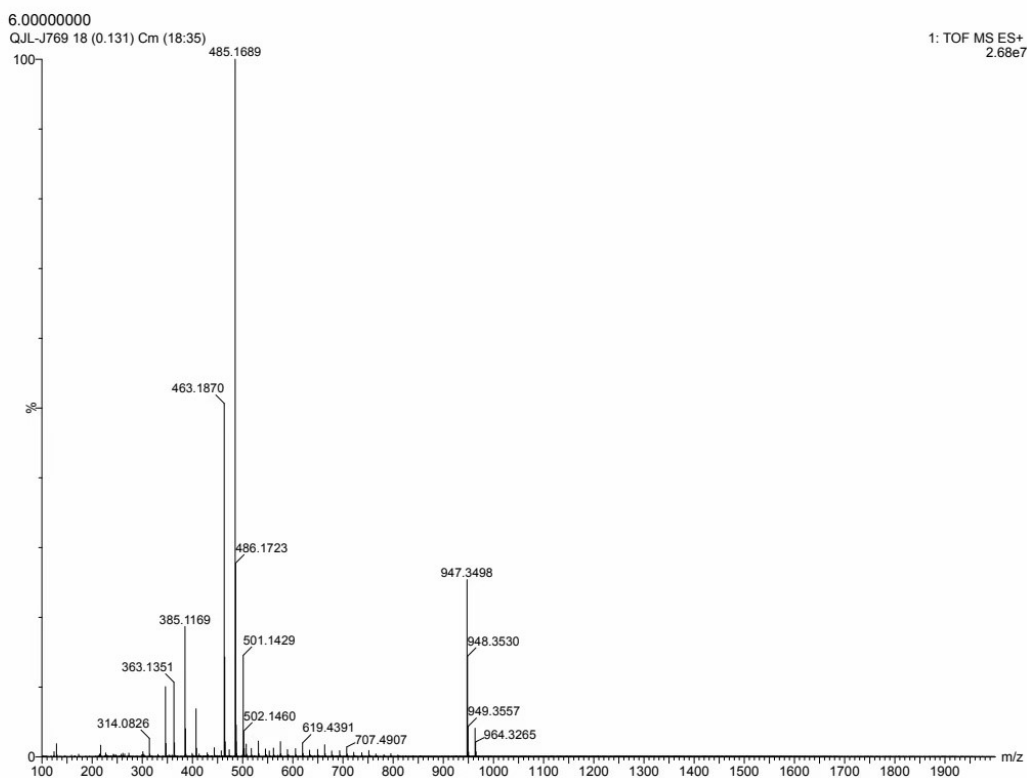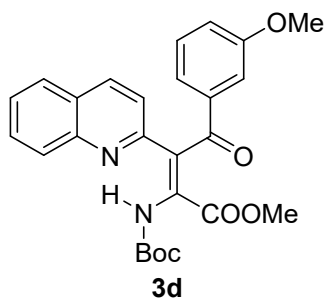

Chemical Formula:  $C_{26}H_{26}N_2O_6$

Exact Mass: 462.1791

Molecular Weight: 462.5020

m/z: 462.1791 (100.0%), 463.1824 (28.1%), 464.1858 (3.8%), 464.1833 (1.2%)

Elemental Analysis: C, 67.52; H, 5.67; N, 6.06; O, 20.76

HRMS (ESI, m/z) calcd for  $C_{26}H_{26}N_2O_6$   $[M+Na]^+$  485.1684, found 485.1689.

### 3e

J732-H\_10.fid

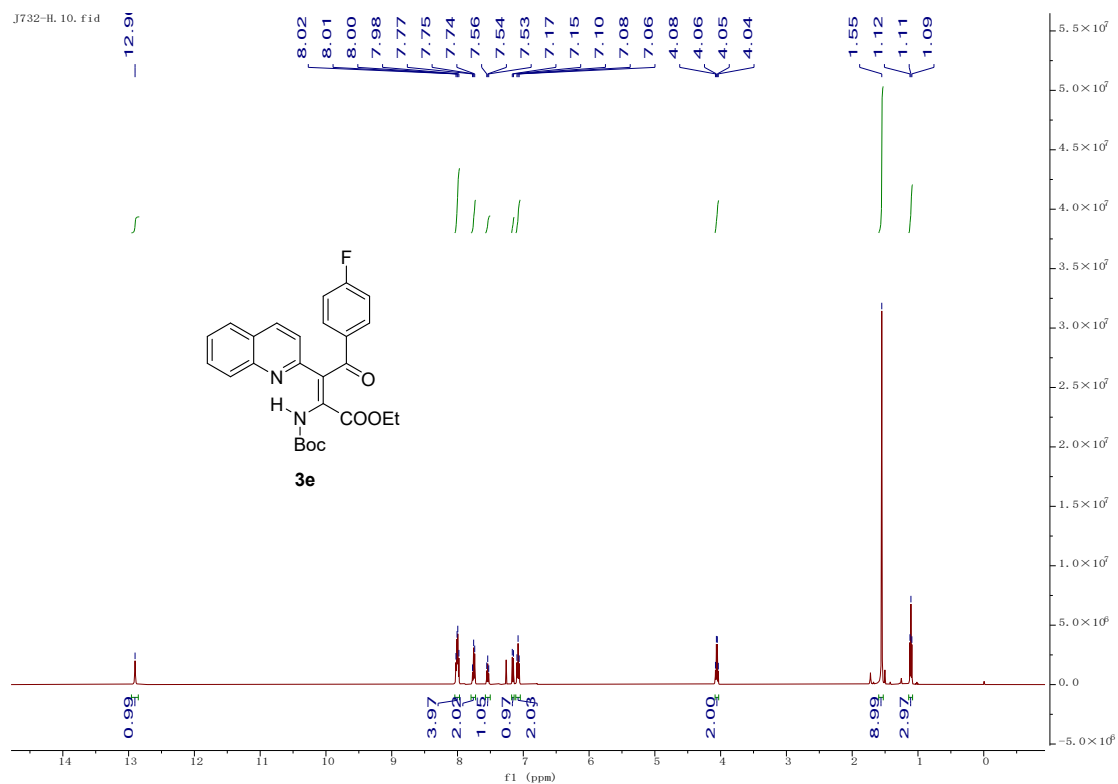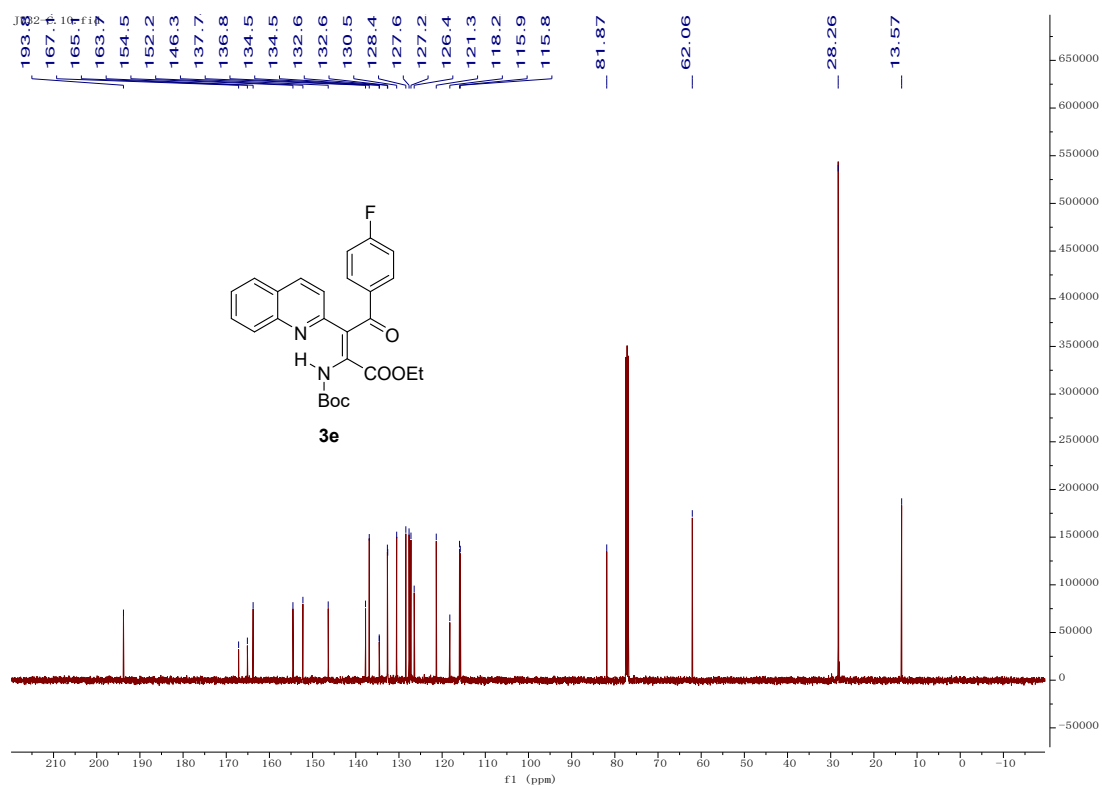

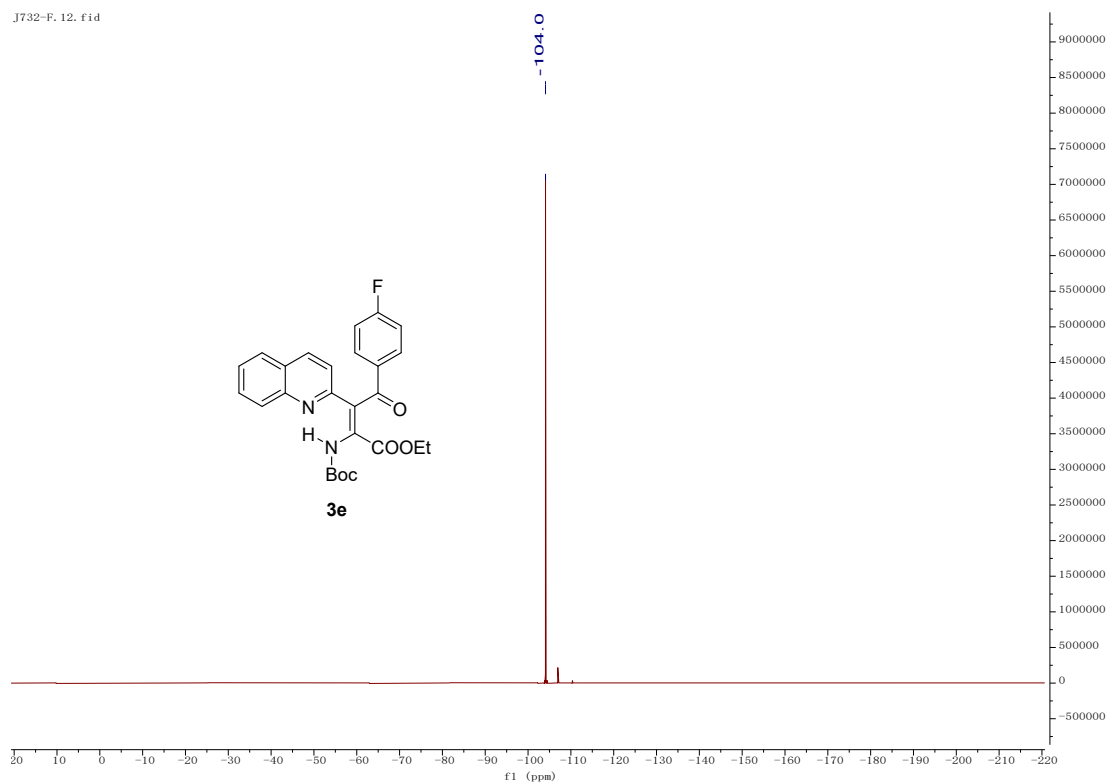

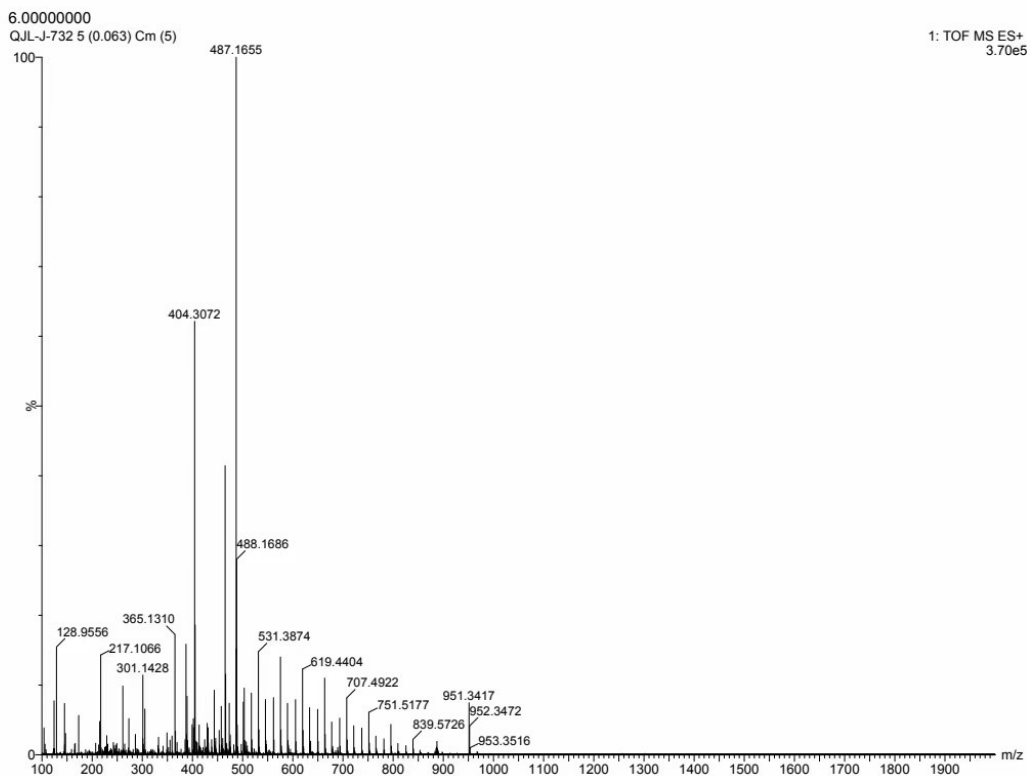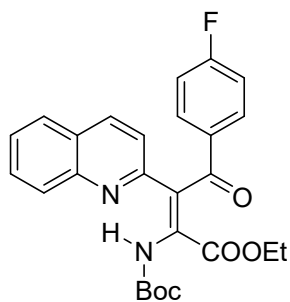

**3e**

Chemical Formula:  $C_{26}H_{25}FN_2O_5$

Exact Mass: 464.1748

Molecular Weight: 464.4934

m/z: 464.1748 (100.0%), 465.1781 (28.1%), 466.1815 (3.8%), 466.1790 (1.0%)

Elemental Analysis: C, 67.23; H, 5.43; F, 4.09; N, 6.03; O, 17.22

HRMS (ESI, m/z) calcd for  $C_{26}H_{25}FN_2O_5$   $[M+Na]^+$  487.1640, found 487.1655.

# 3f

J738-H, 10, f1.d

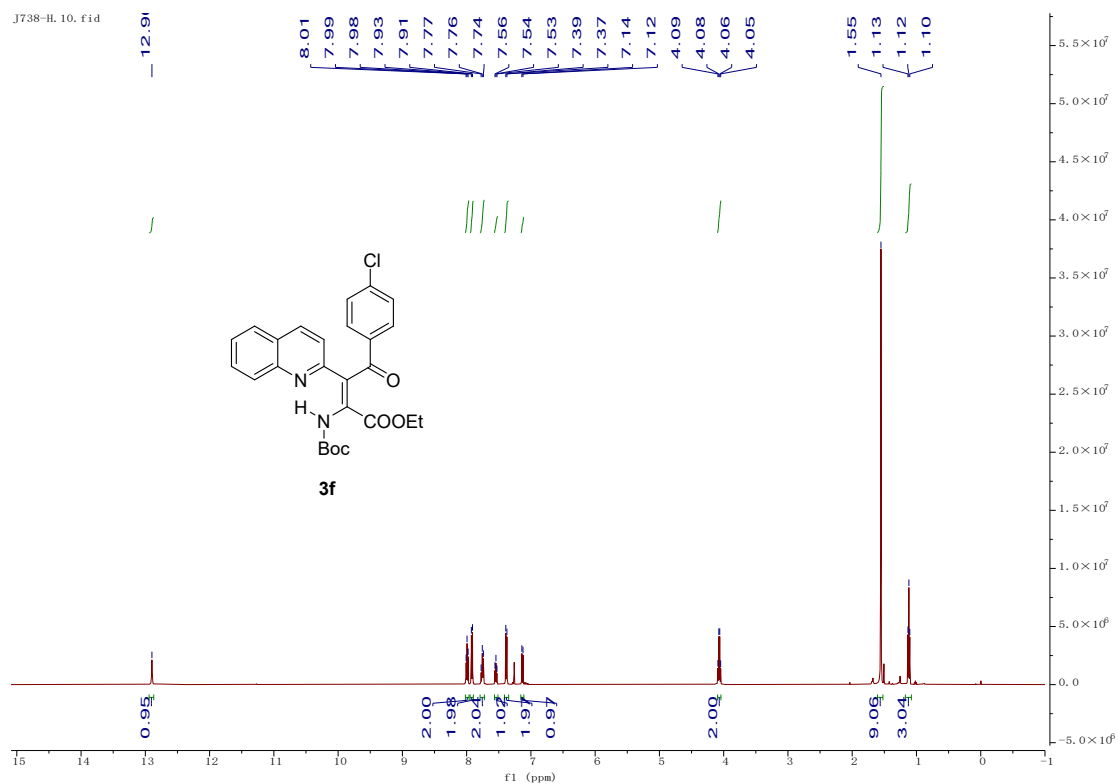

J738-C, 10, f1.d

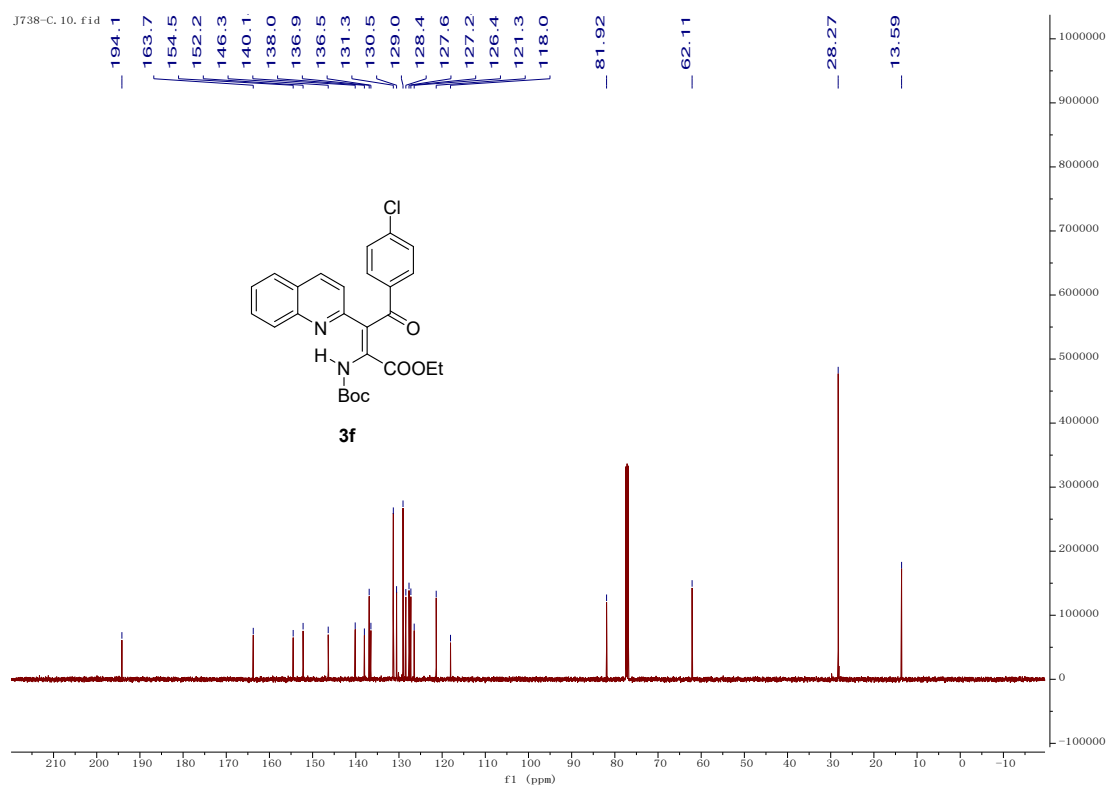

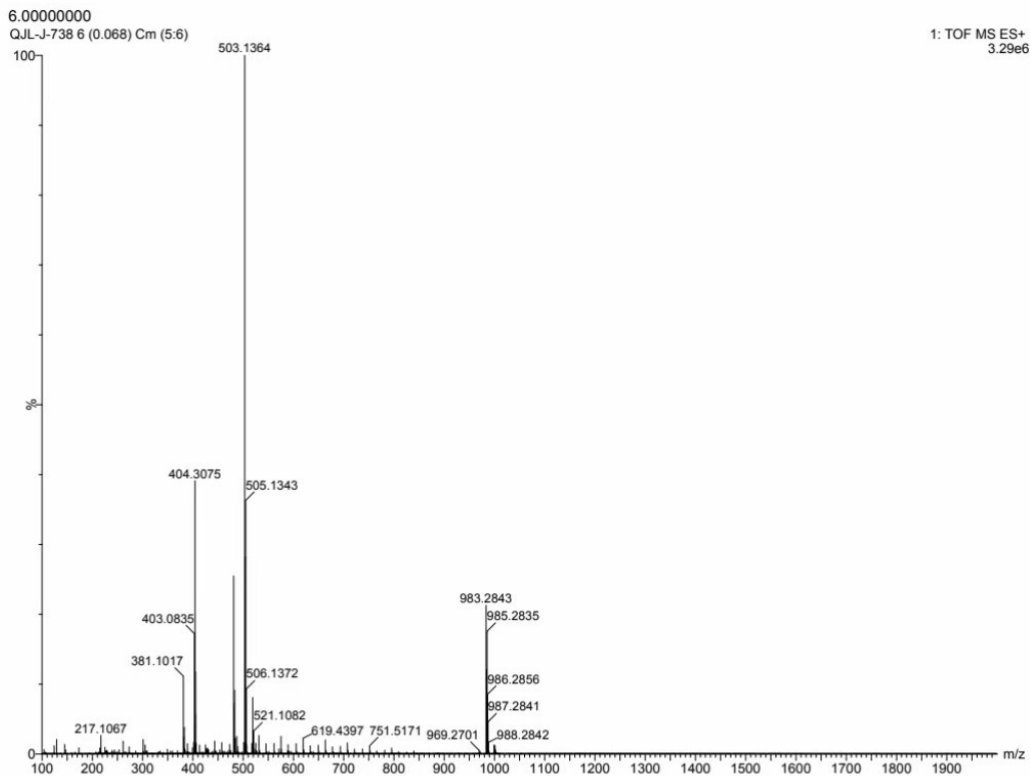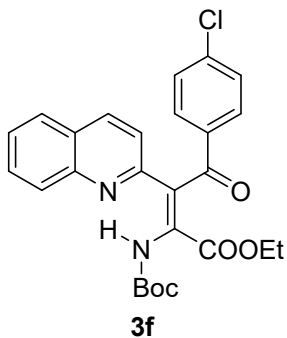

Chemical Formula:  $C_{26}H_{25}ClN_2O_5$

Exact Mass: 480.1452

Molecular Weight: 480.9450

m/z: 480.1452 (100.0%), 482.1422 (32.0%), 481.1486 (28.1%),  
483.1456 (9.0%), 482.1519 (3.8%), 484.1490 (1.2%), 482.1494 (1.0%)

Elemental Analysis: C, 64.93; H, 5.24; Cl, 7.37; N, 5.82; O, 16.63

HRMS (ESI, m/z) calcd for  $C_{26}H_{25}ClN_2O_5$   $[M+Na]^+$  503.1345, found 503.1364.

# 3g

J729-H, 10, fid

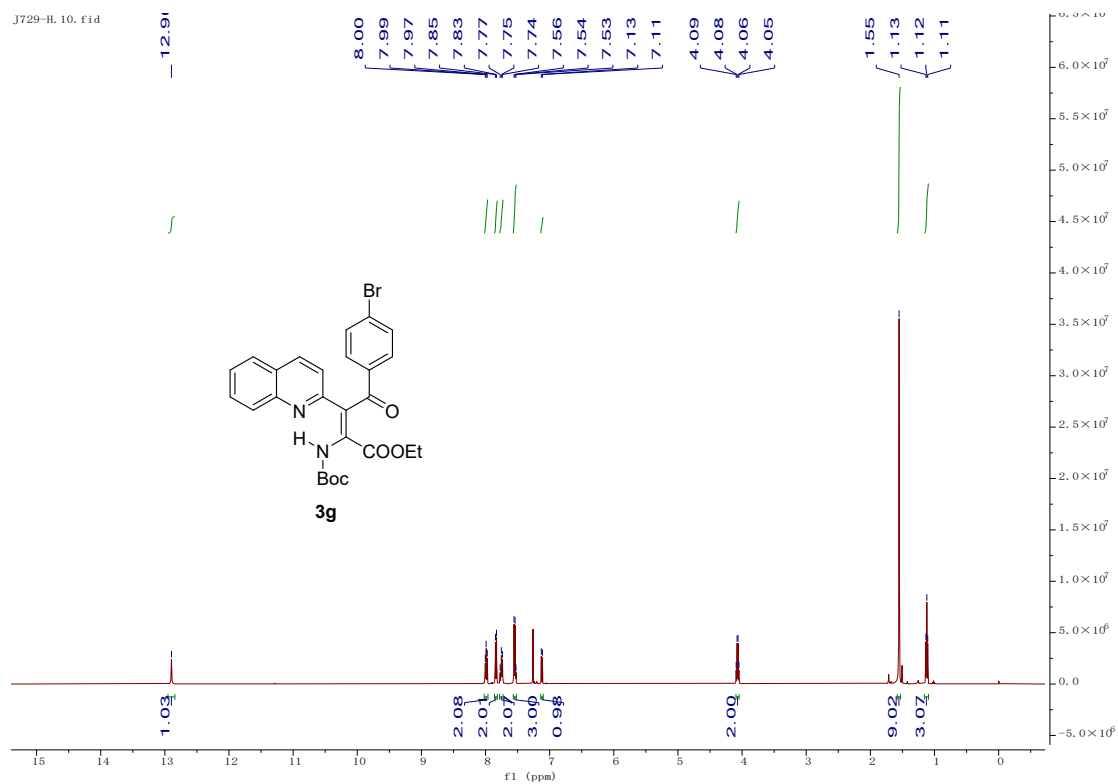

J1075C, 1, fid

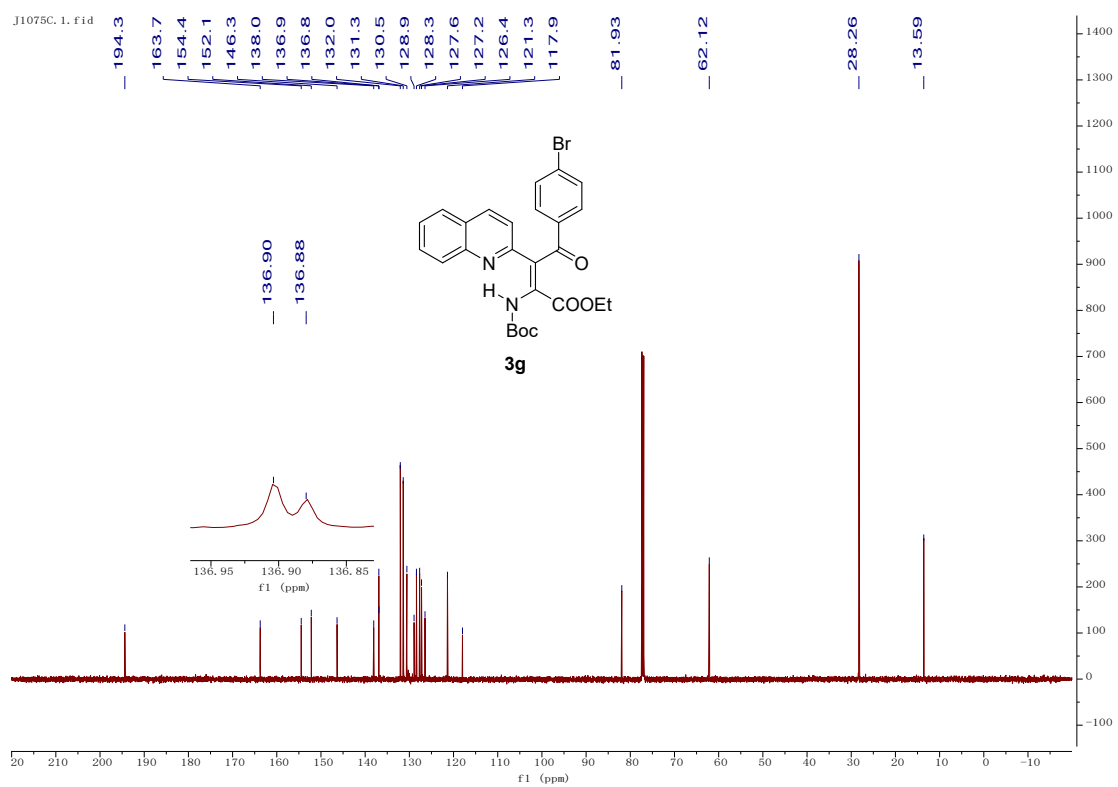

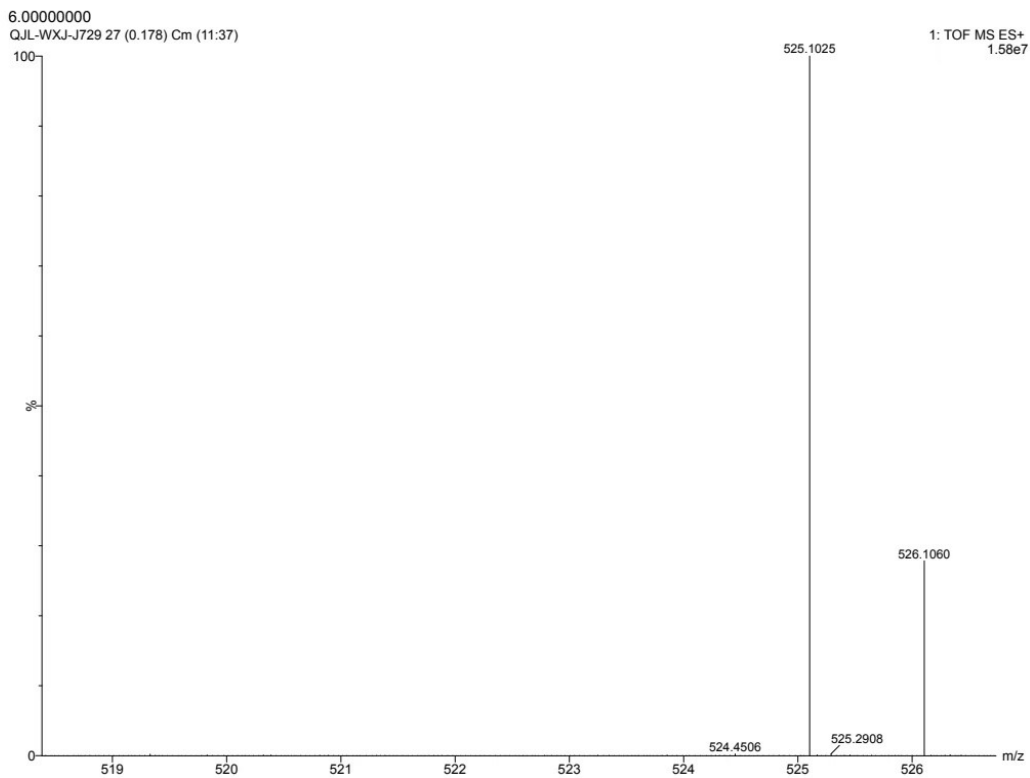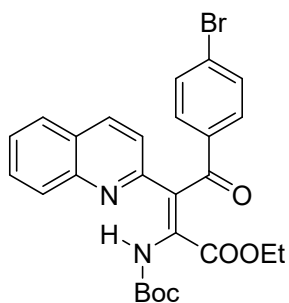

**3g**

Chemical Formula:  $C_{26}H_{25}BrN_2O_5$

Exact Mass: 524.0947

Molecular Weight: 525.3990

m/z: 524.0947 (100.0%), 526.0926 (97.3%), 525.0980 (28.1%),  
527.0960 (27.4%), 526.1014 (3.8%), 528.0993 (3.7%), 526.0989 (1.0%), 528.0969 (1.0%)

Elemental Analysis: C, 59.44; H, 4.80; Br, 15.21; N, 5.33; O, 15.23

HRMS (ESI, m/z) calcd for  $C_{26}H_{25}BrN_2O_5$   $[M+H]^+$  525.1020, found 525.1025.

### 3h

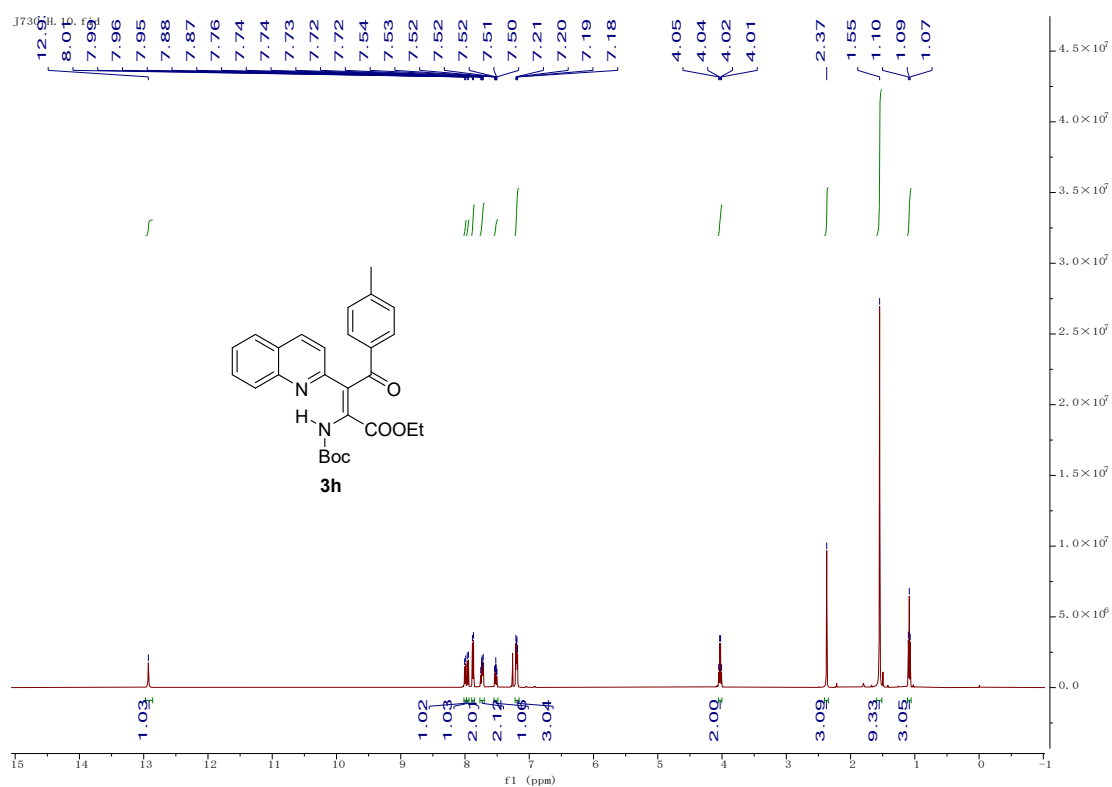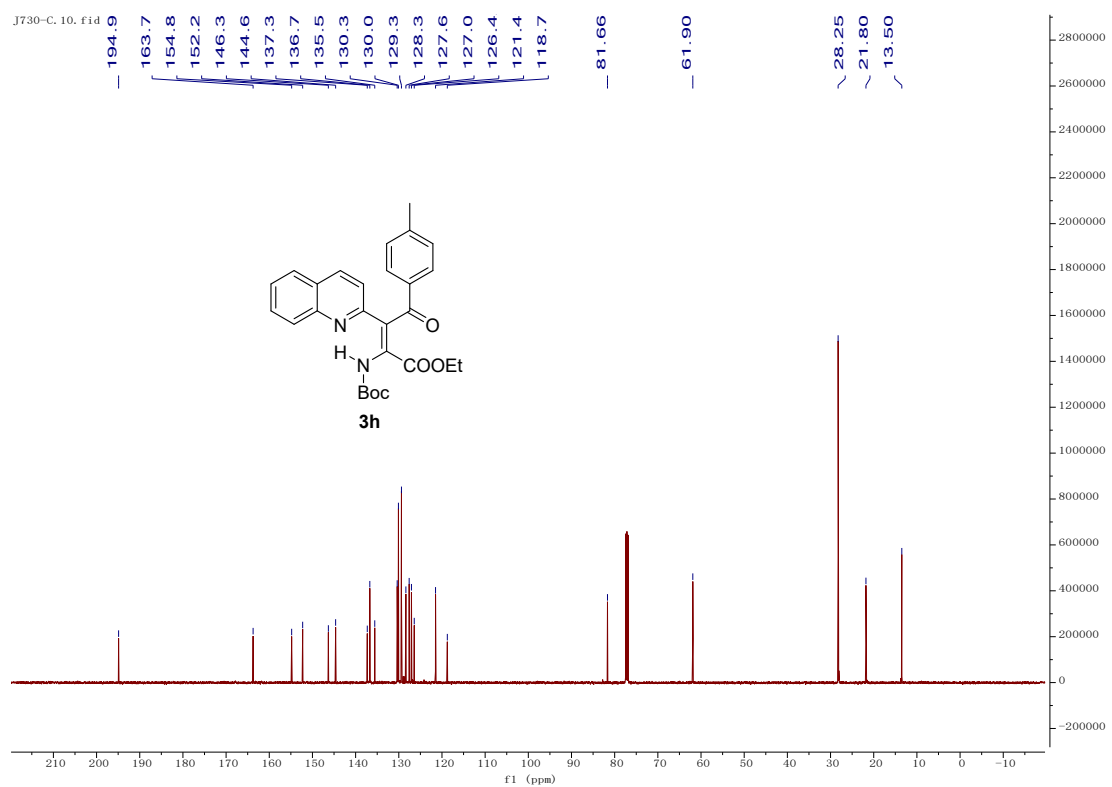

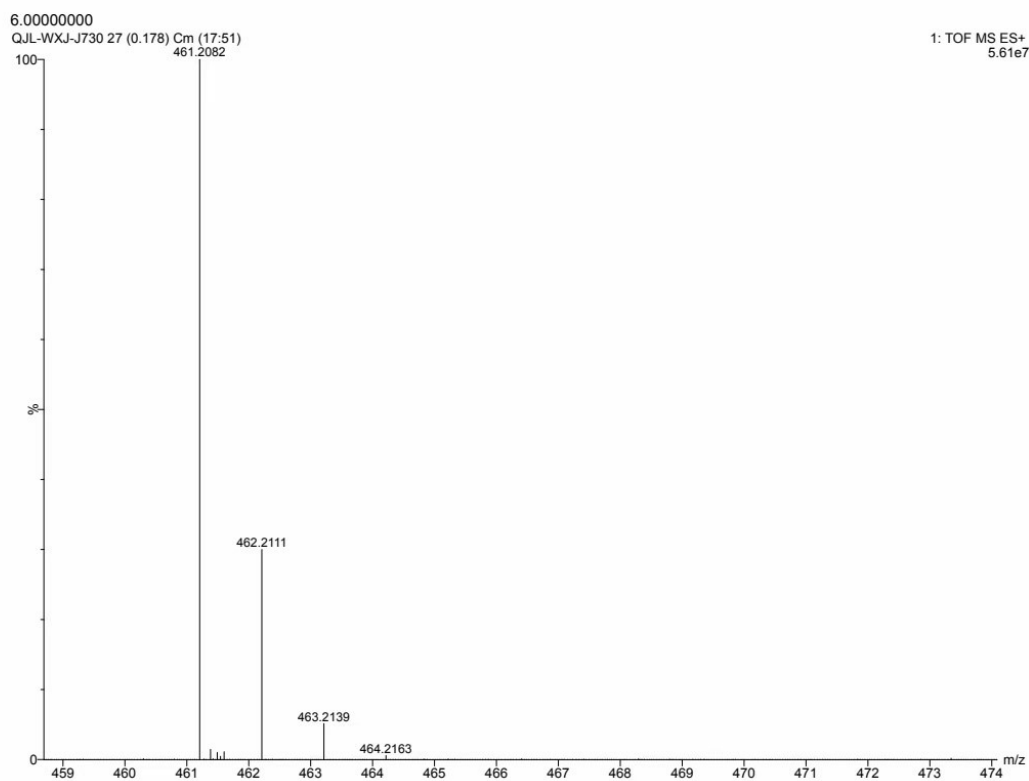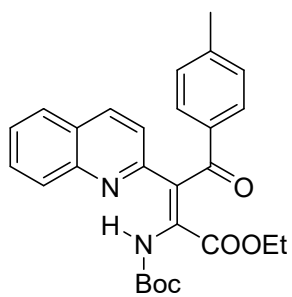

**3h**

Chemical Formula:  $C_{27}H_{28}N_2O_5$

Exact Mass: 460.1998

Molecular Weight: 460.5300

m/z: 460.1998 (100.0%), 461.2032 (29.2%), 462.2065 (4.1%), 462.2041 (1.0%)

Elemental Analysis: C, 70.42; H, 6.13; N, 6.08; O, 17.37

HRMS (ESI, m/z) calcd for  $C_{27}H_{28}N_2O_5$   $[M+H]^+$  461.2071, found 461.2082.

3i

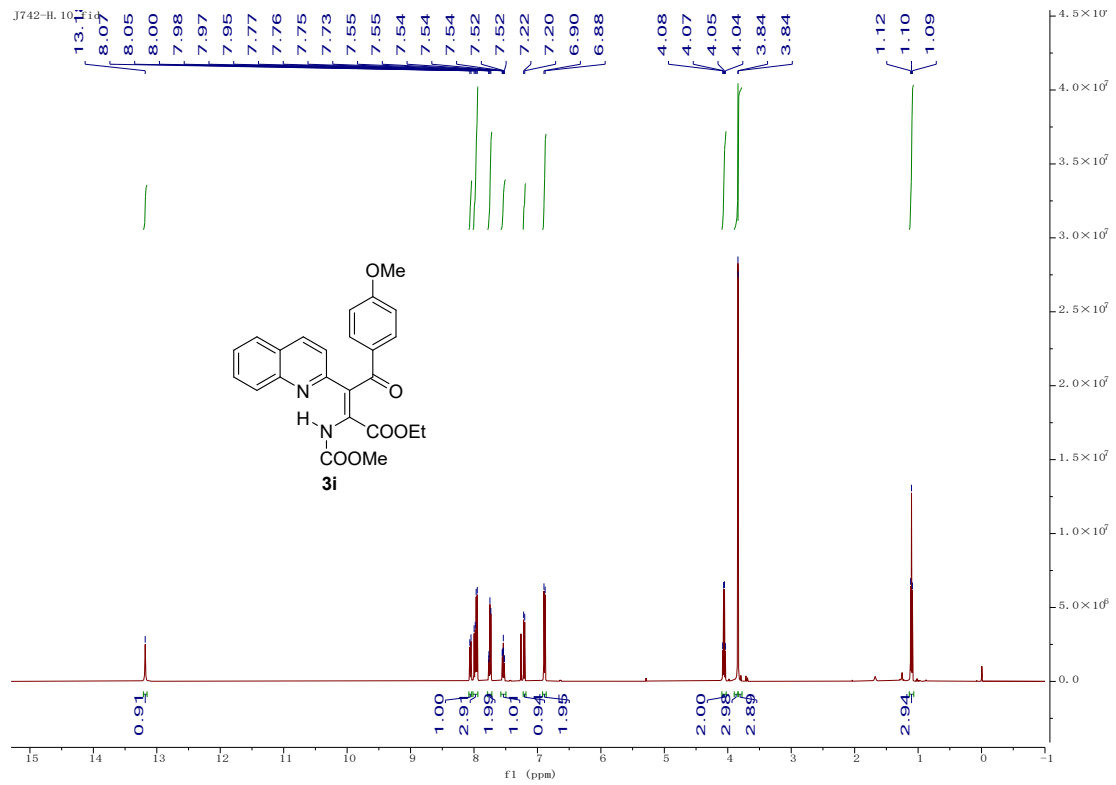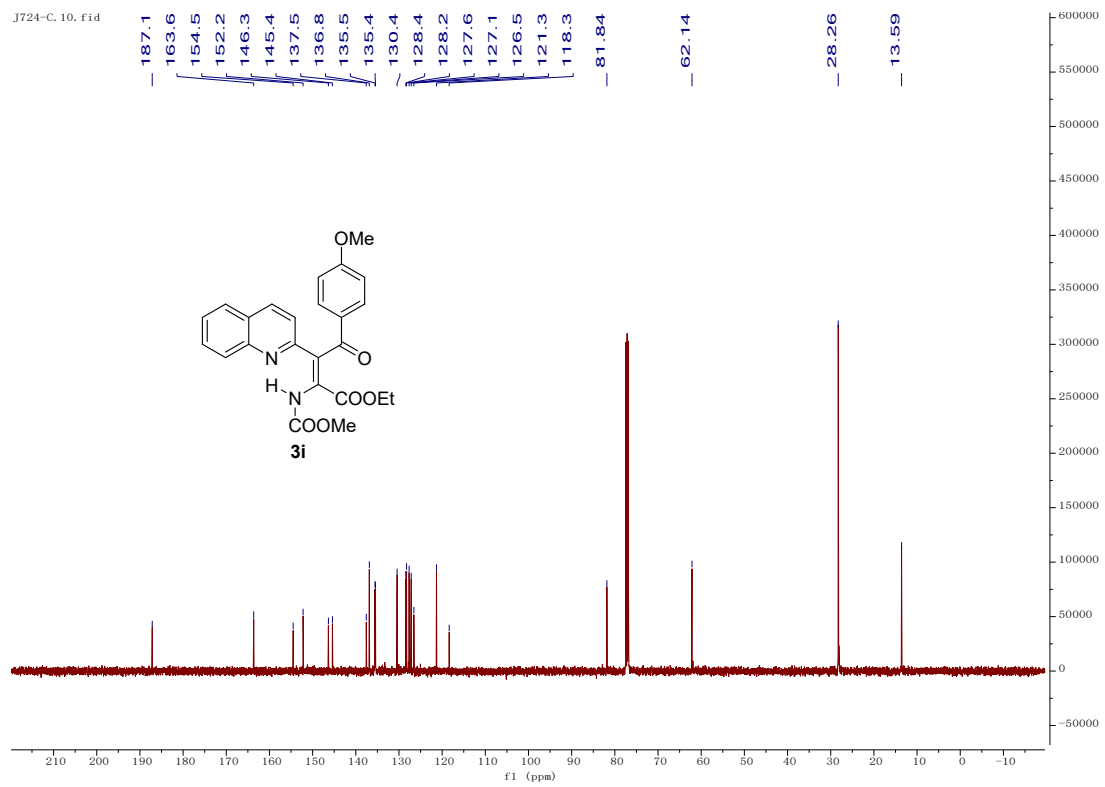

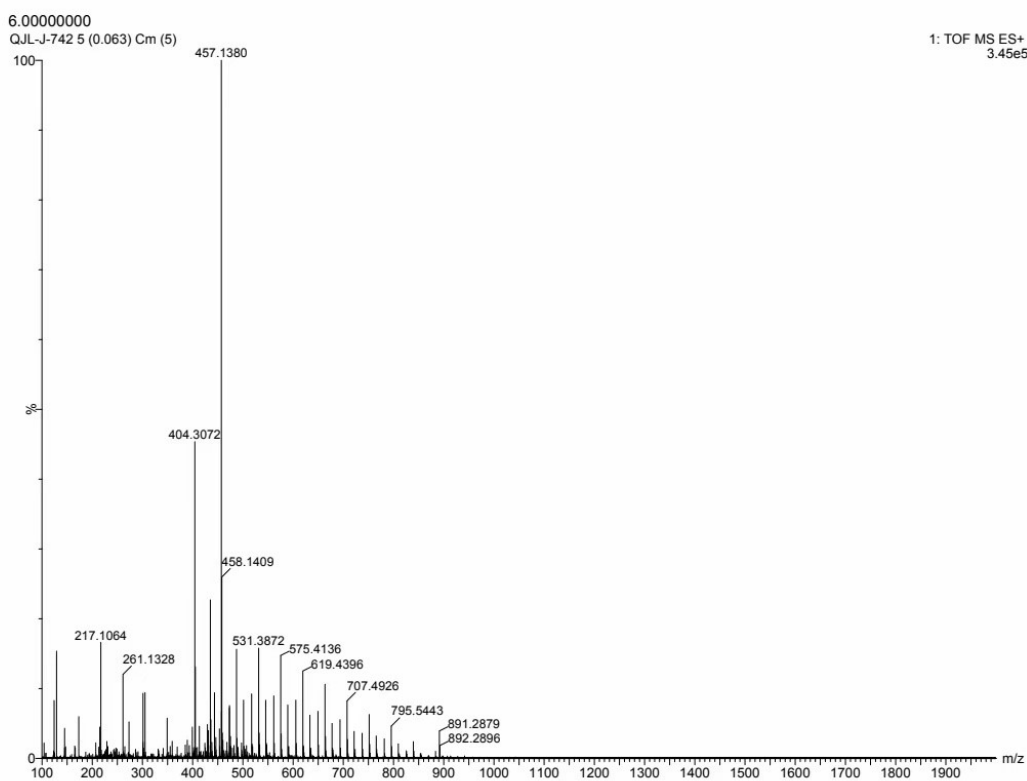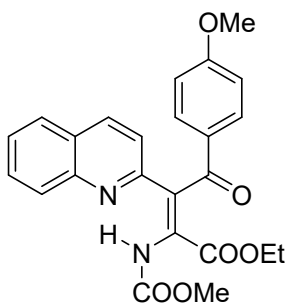

**3i**

Chemical Formula:  $C_{24}H_{22}N_2O_6$

Exact Mass: 434.1478

Molecular Weight: 434.4480

m/z: 434.1478 (100.0%), 435.1511 (26.0%), 436.1545 (3.2%), 436.1520 (1.2%)

Elemental Analysis: C, 66.35; H, 5.10; N, 6.45; O, 22.10

HRMS (ESI, m/z) calcd for  $C_{24}H_{22}N_2O_6$   $[M+Na]^+$  457.1371, found 457.1380.

3j

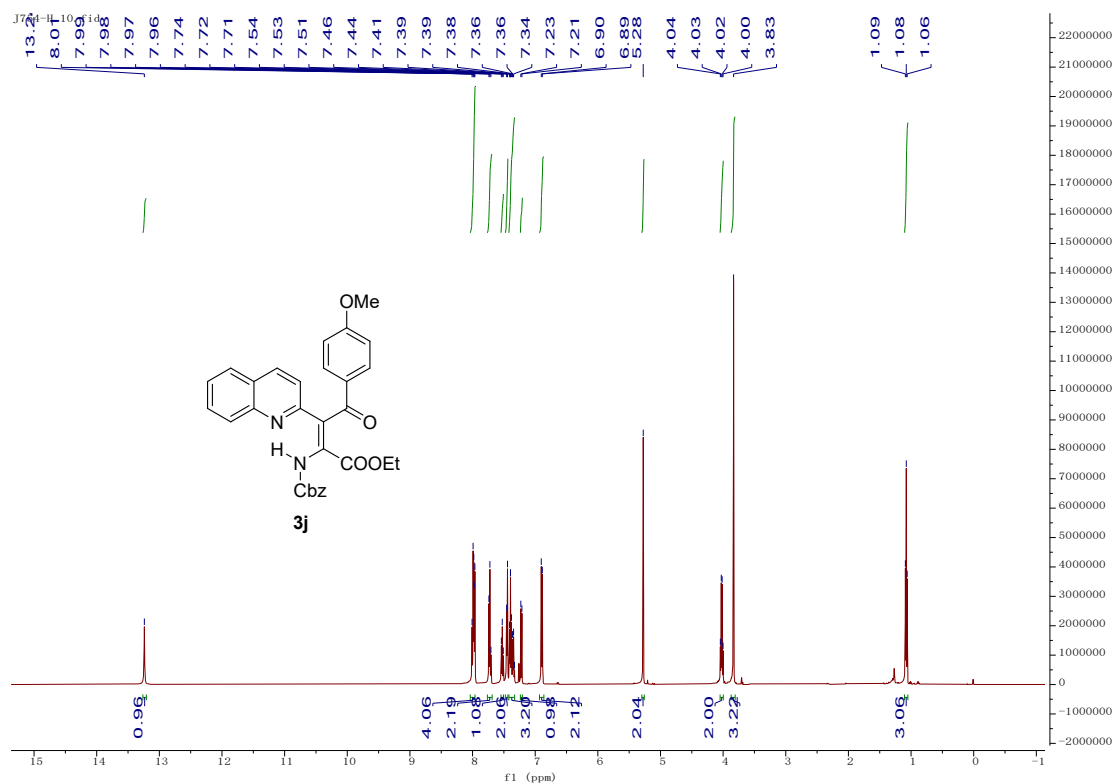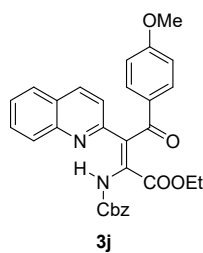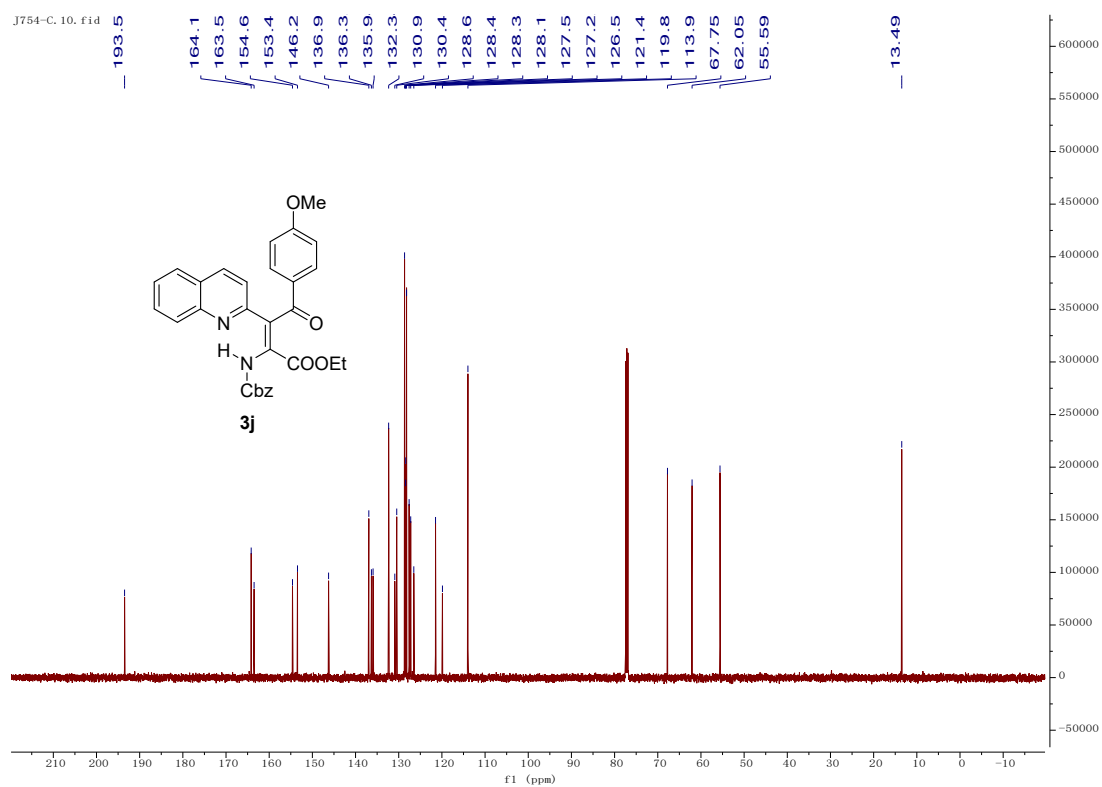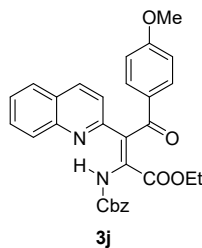

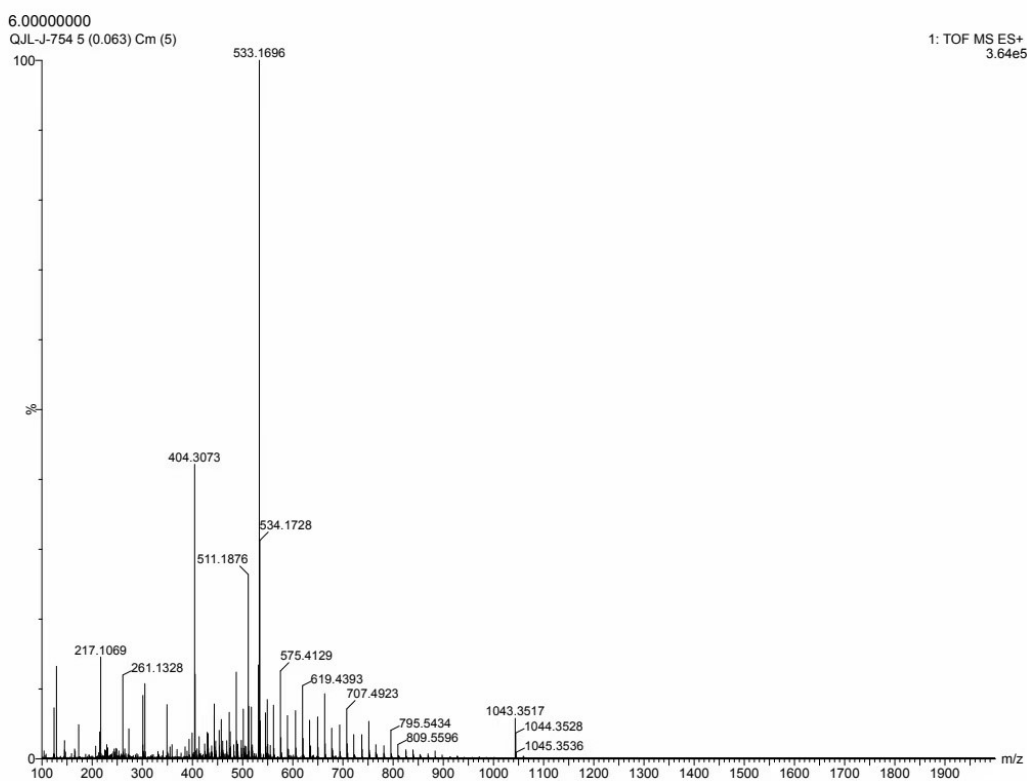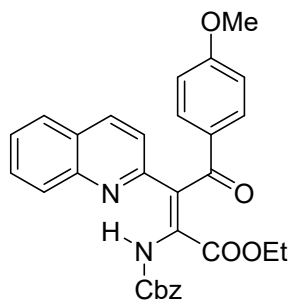

**3j**

Chemical Formula:  $C_{30}H_{26}N_2O_6$

Exact Mass: 510.1791

Molecular Weight: 510.5460

m/z: 510.1791 (100.0%), 511.1824 (32.4%), 512.1858 (5.1%), 512.1833 (1.2%)

Elemental Analysis: C, 70.58; H, 5.13; N, 5.49; O, 18.80

HRMS (ESI, m/z) calcd for  $C_{30}H_{26}N_2O_6$   $[M+Na]^+$  533.1684, found 533.1696.

# 3k

J724-H. 10. fid

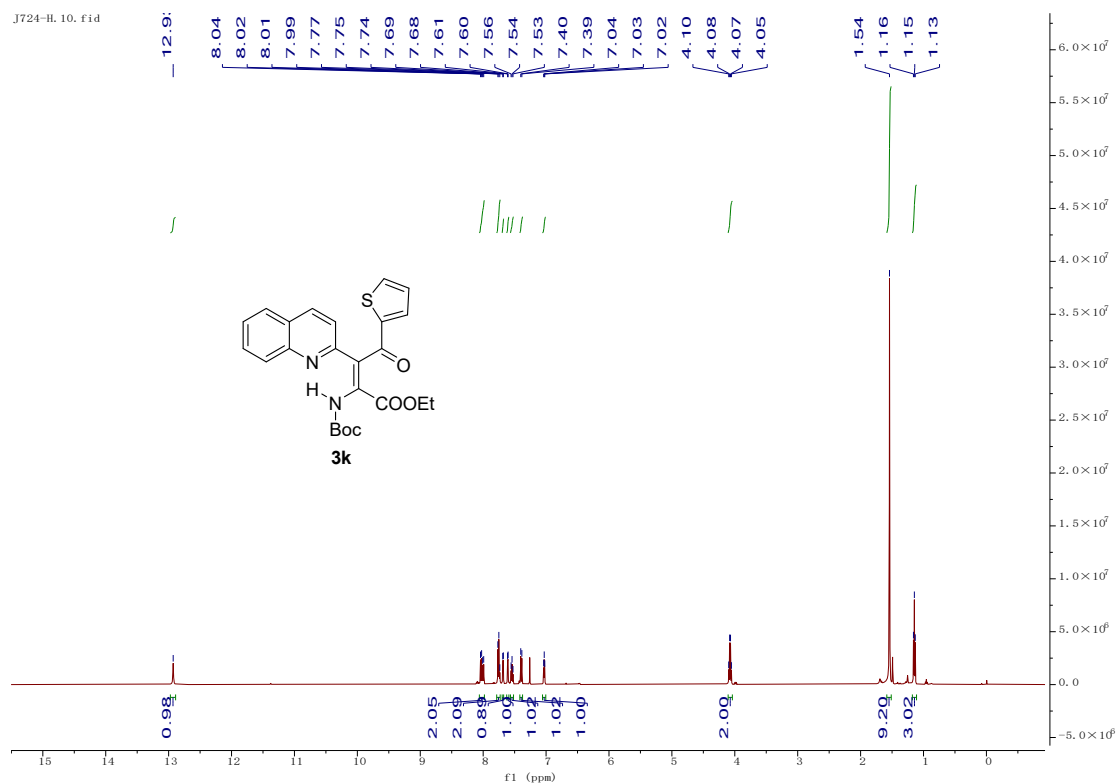

J724-C. 10. fid

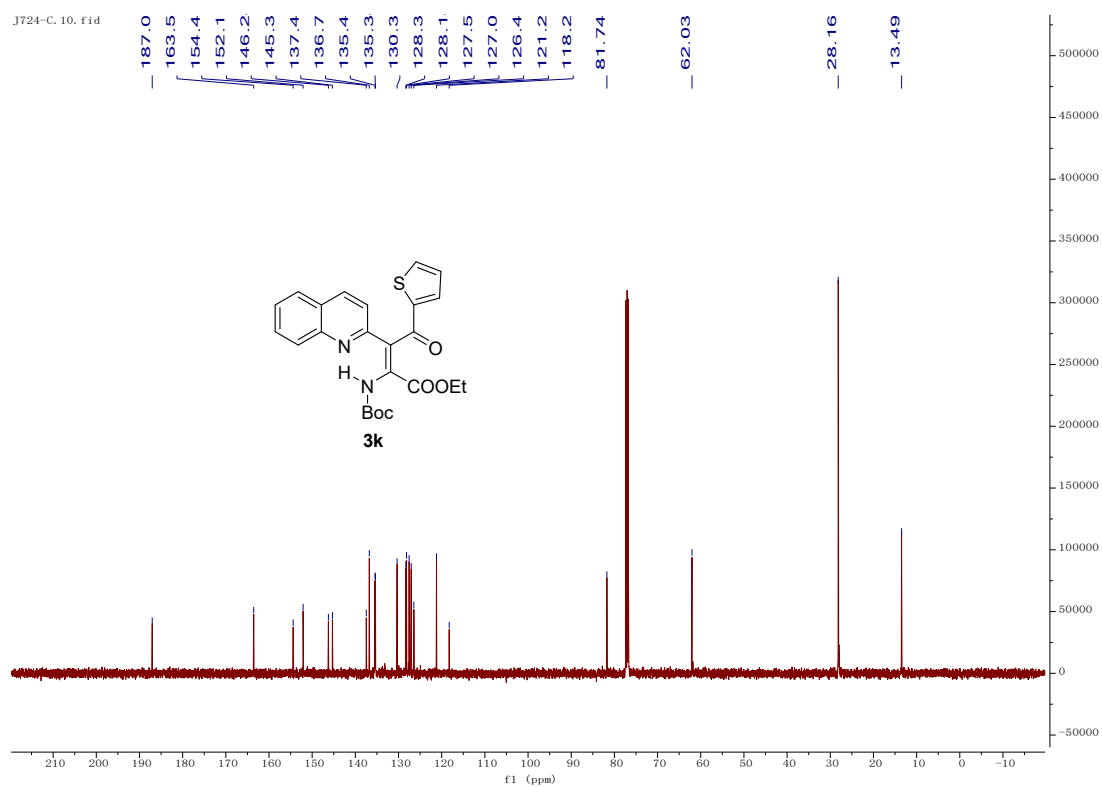

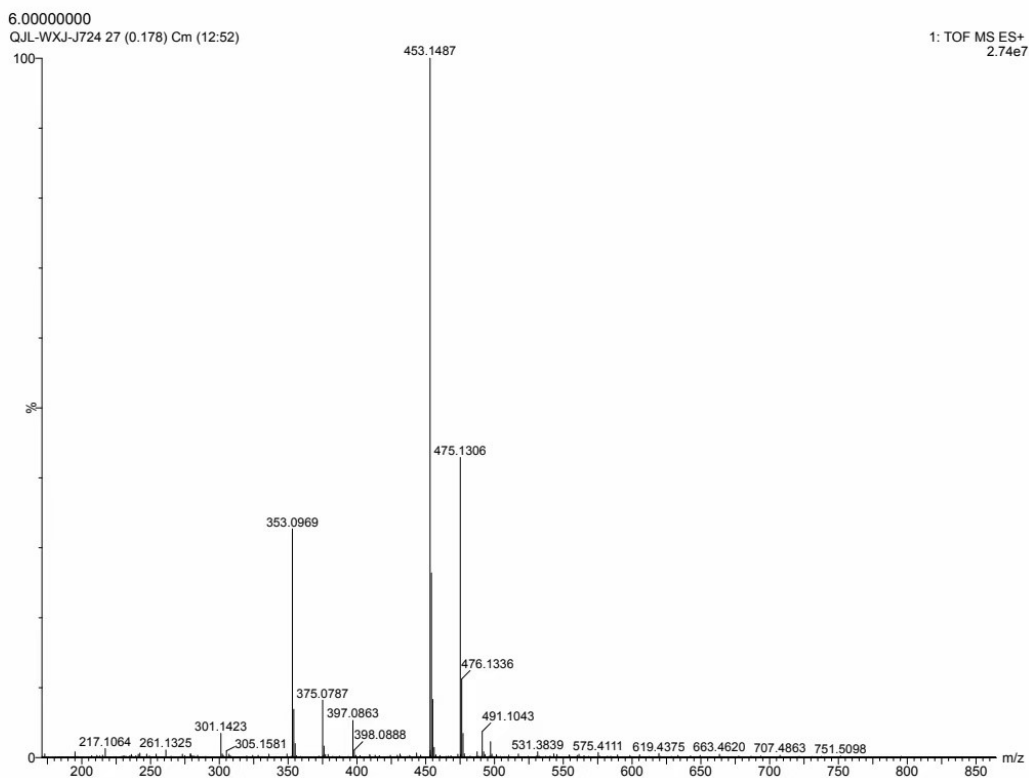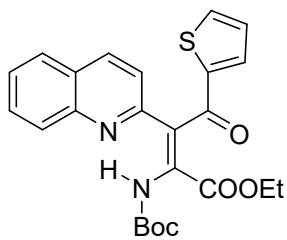

**3k**

Chemical Formula:  $C_{24}H_{24}N_2O_5S$

Exact Mass: 452.1406

Molecular Weight: 452.5250

$m/z$ : 452.1406 (100.0%), 453.1439 (26.0%), 454.1364 (4.5%),

454.1473 (3.2%), 455.1397 (1.2%), 454.1448 (1.0%)

Elemental Analysis: C, 63.70; H, 5.35; N, 6.19; O, 17.68; S, 7.08

HRMS (ESI,  $m/z$ ) calcd for  $C_{24}H_{24}N_2O_5S$   $[M+H]^+$  453.1479, found 453.1487.

3I

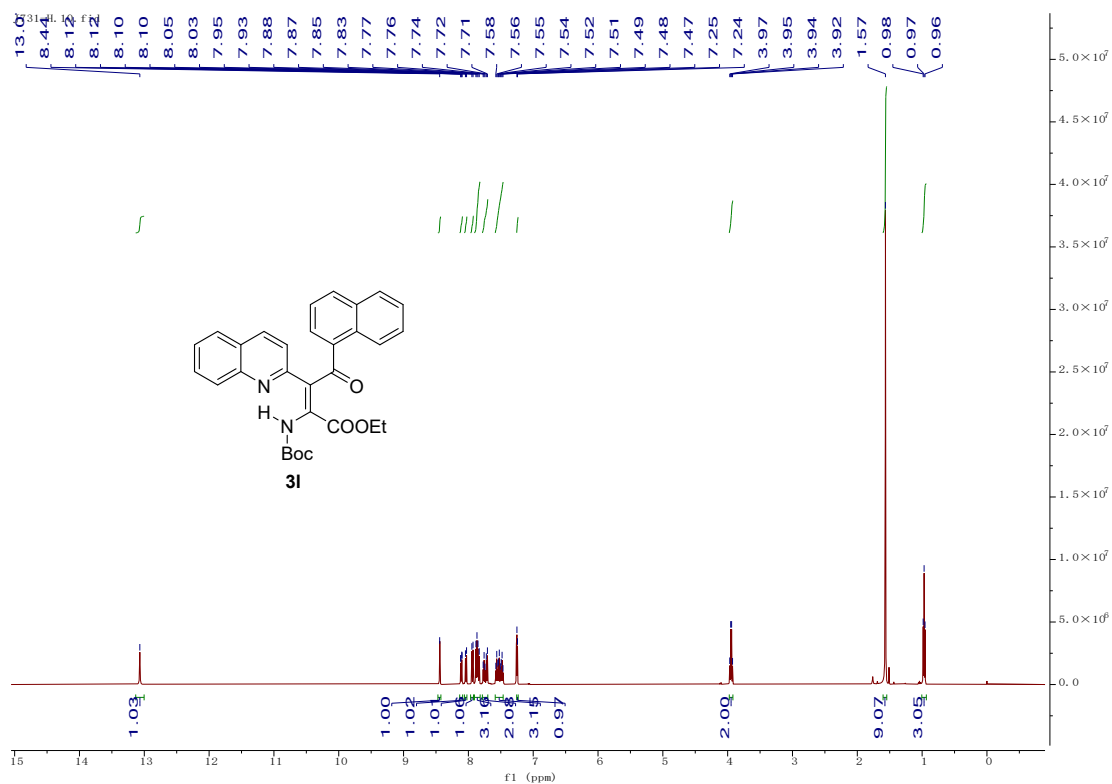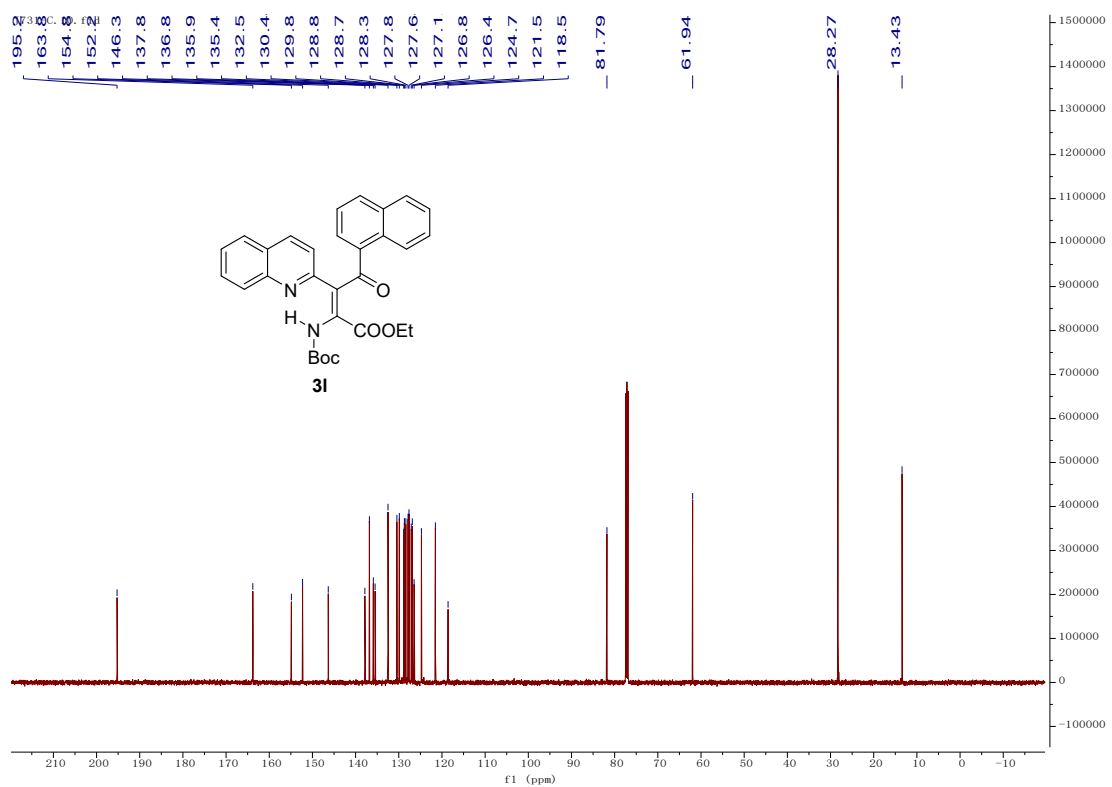

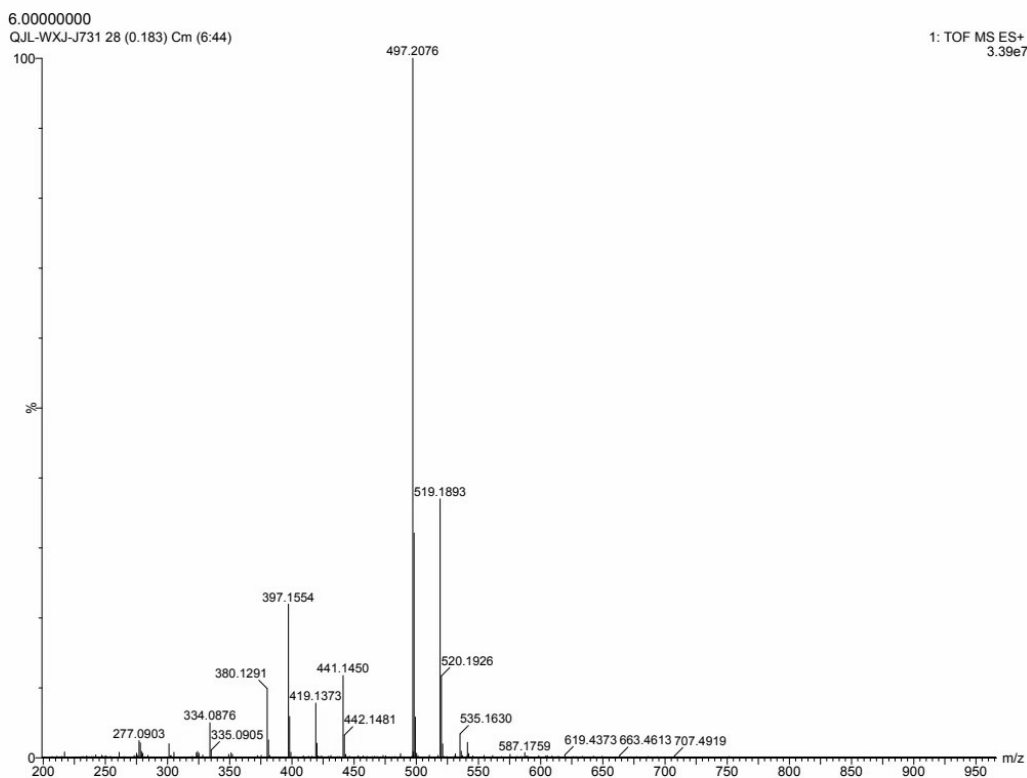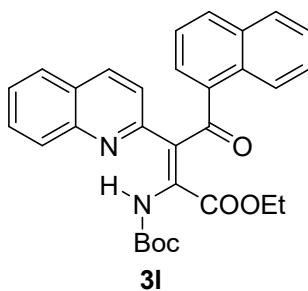

Chemical Formula:  $C_{30}H_{28}N_2O_5$

Exact Mass: 496.1998

Molecular Weight: 496.5630

m/z: 496.1998 (100.0%), 497.2032 (32.4%), 498.2065 (5.1%), 498.2041 (1.0%)

Elemental Analysis: C, 72.56; H, 5.68; N, 5.64; O, 16.11

HRMS (ESI, m/z) calcd for  $C_{30}H_{28}N_2O_5$   $[M+H]^+$  497.2071, found 497.2076.

### 3m

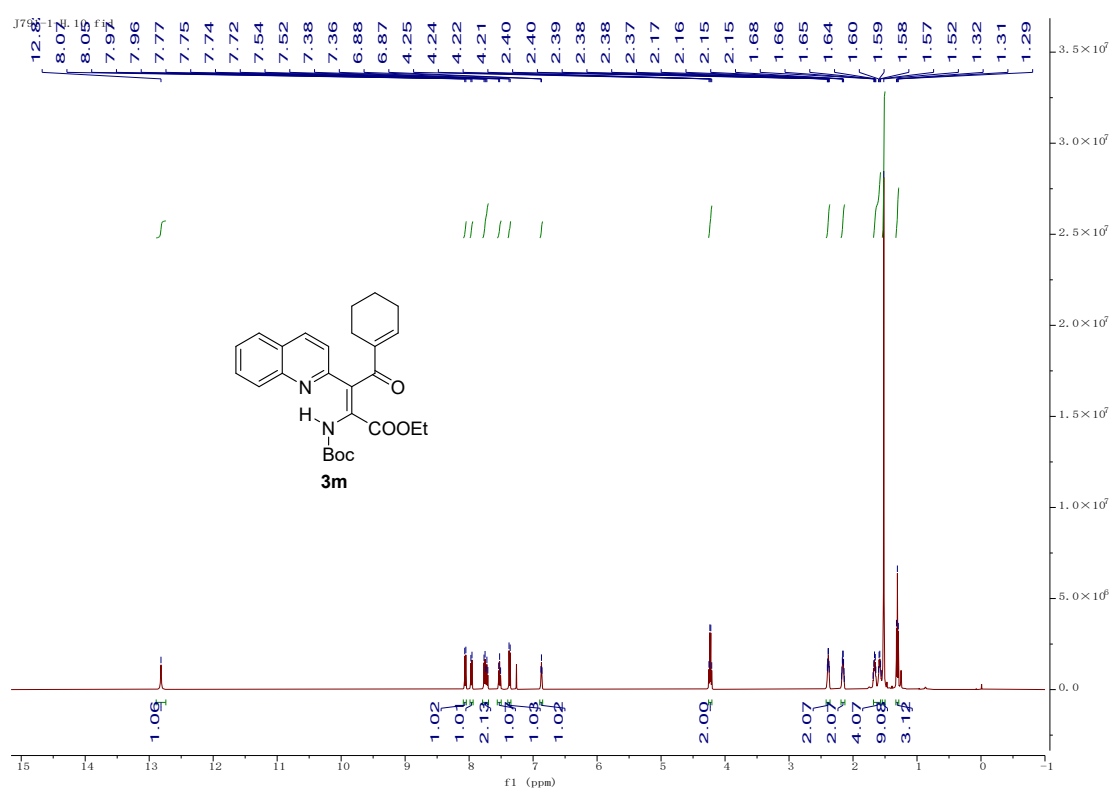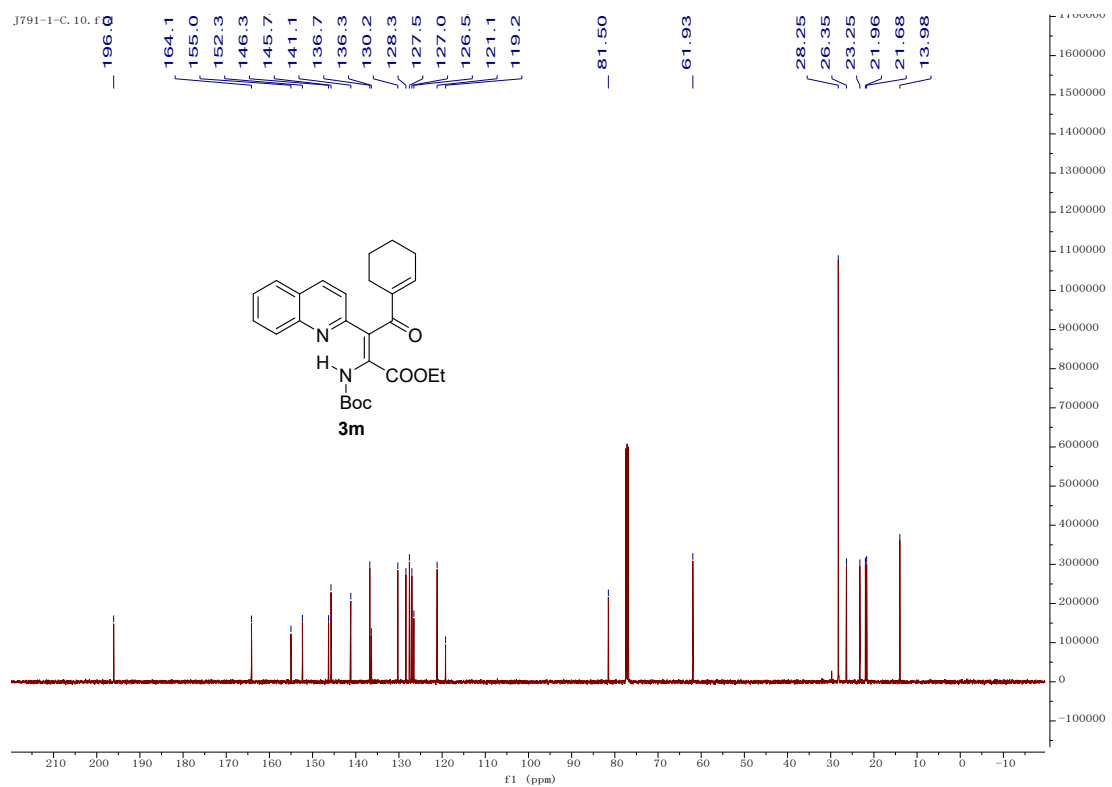

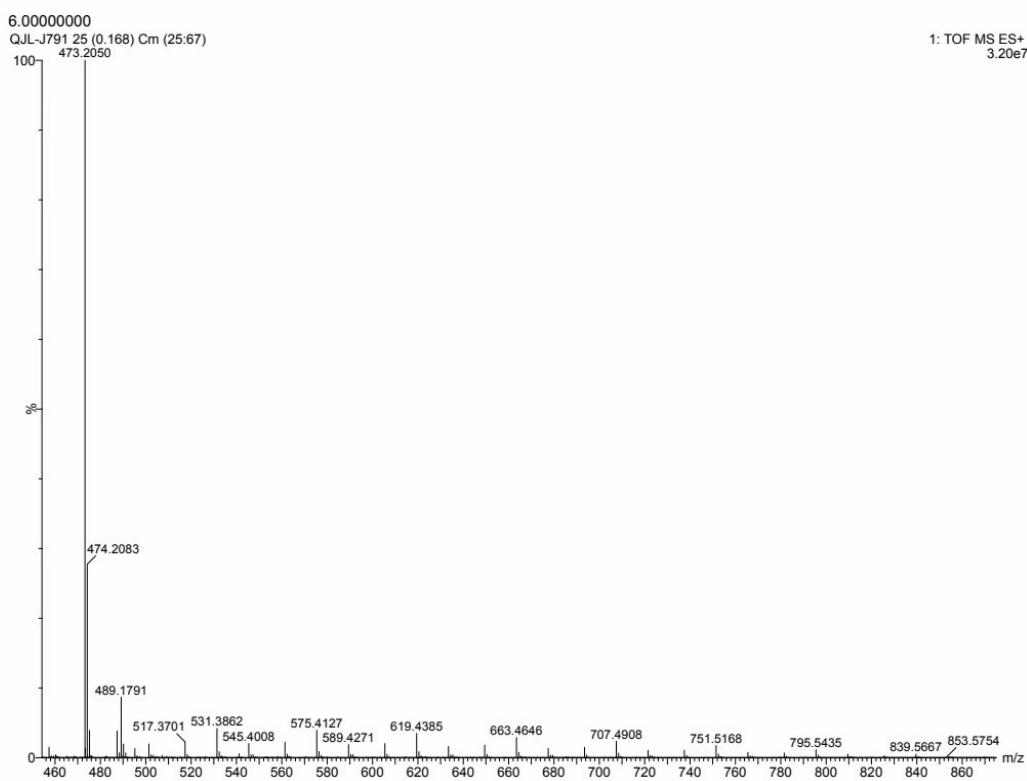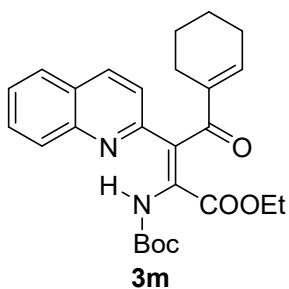

Chemical Formula:  $C_{26}H_{30}N_2O_5$

Exact Mass: 450.2155

Molecular Weight: 450.5350

m/z: 450.2155 (100.0%), 451.2188 (28.1%), 452.2222 (3.8%), 452.2197 (1.0%)

Elemental Analysis: C, 69.31; H, 6.71; N, 6.22; O, 17.76

HRMS (ESI, m/z) calcd for  $C_{26}H_{30}N_2O_5$   $[M+Na]^+$  473.2047, found 473.2050.

### 3n

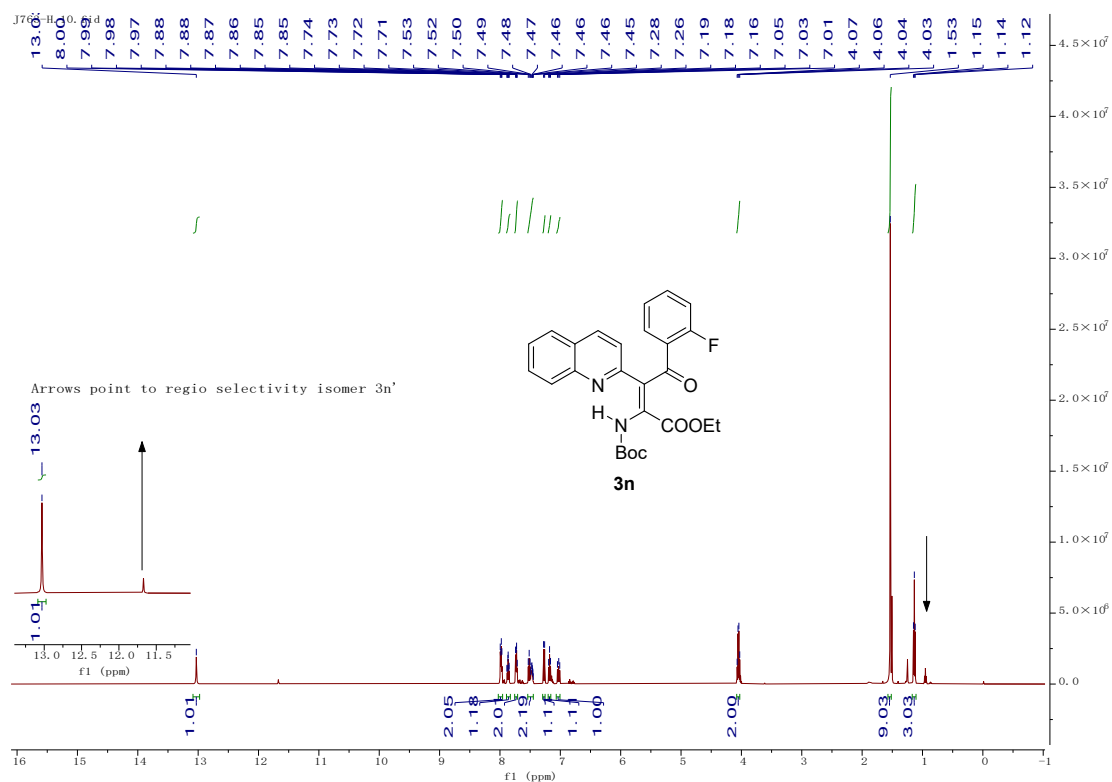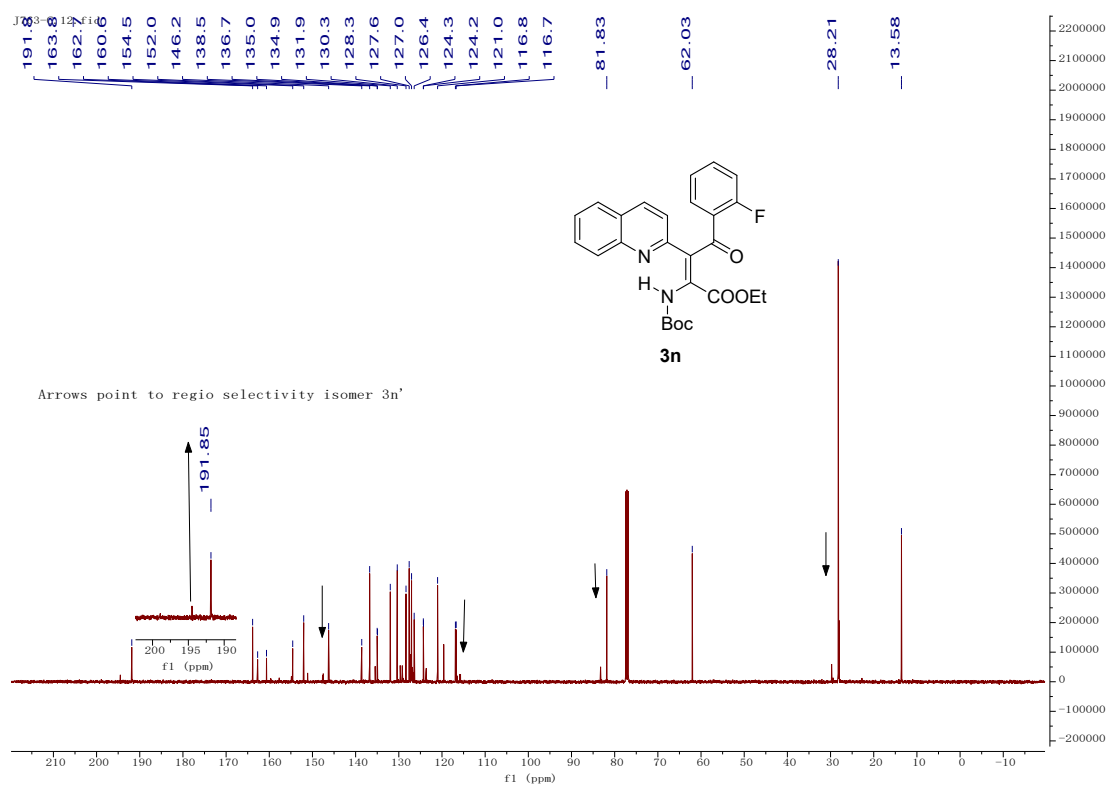

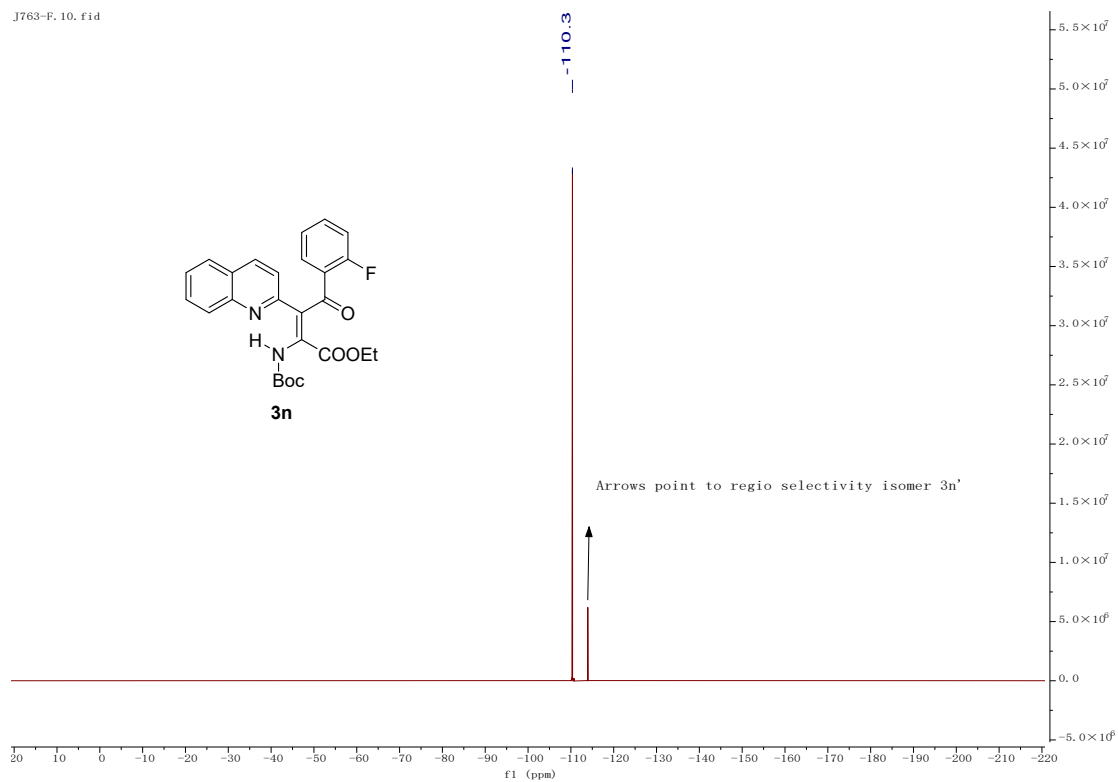

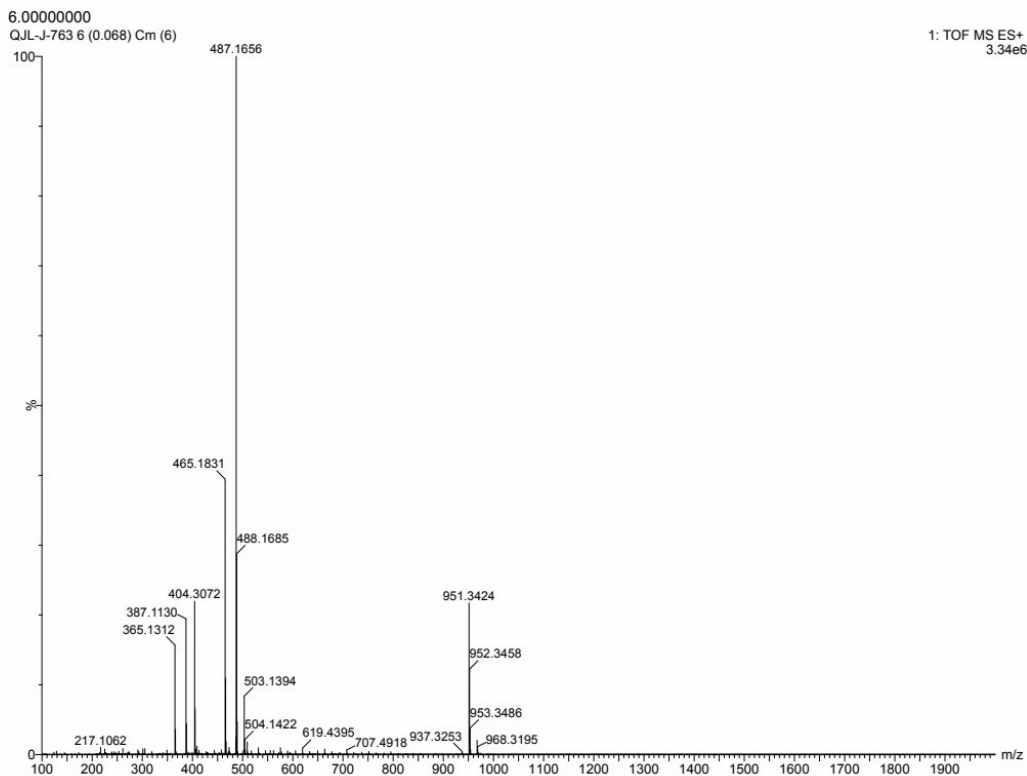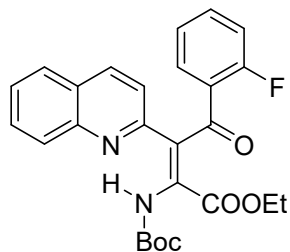

**3n**

Chemical Formula:  $C_{26}H_{25}FN_2O_5$

Exact Mass: 464.1748

Molecular Weight: 464.4934

m/z: 464.1748 (100.0%), 465.1781 (28.1%), 466.1815 (3.8%), 466.1790 (1.0%)

Elemental Analysis: C, 67.23; H, 5.43; F, 4.09; N, 6.03; O, 17.22

HRMS (ESI, m/z) calcd for  $C_{26}H_{25}N_2O_5$   $[M+Na]^+$  487.1640, found 487.1656.

30

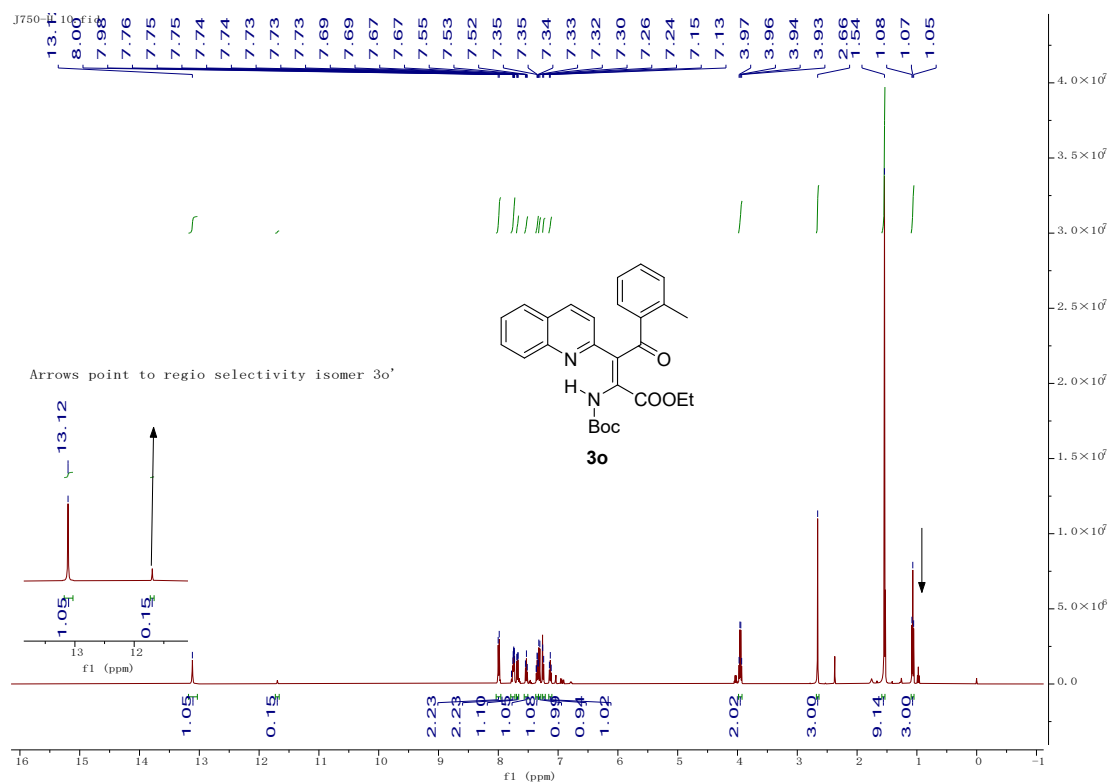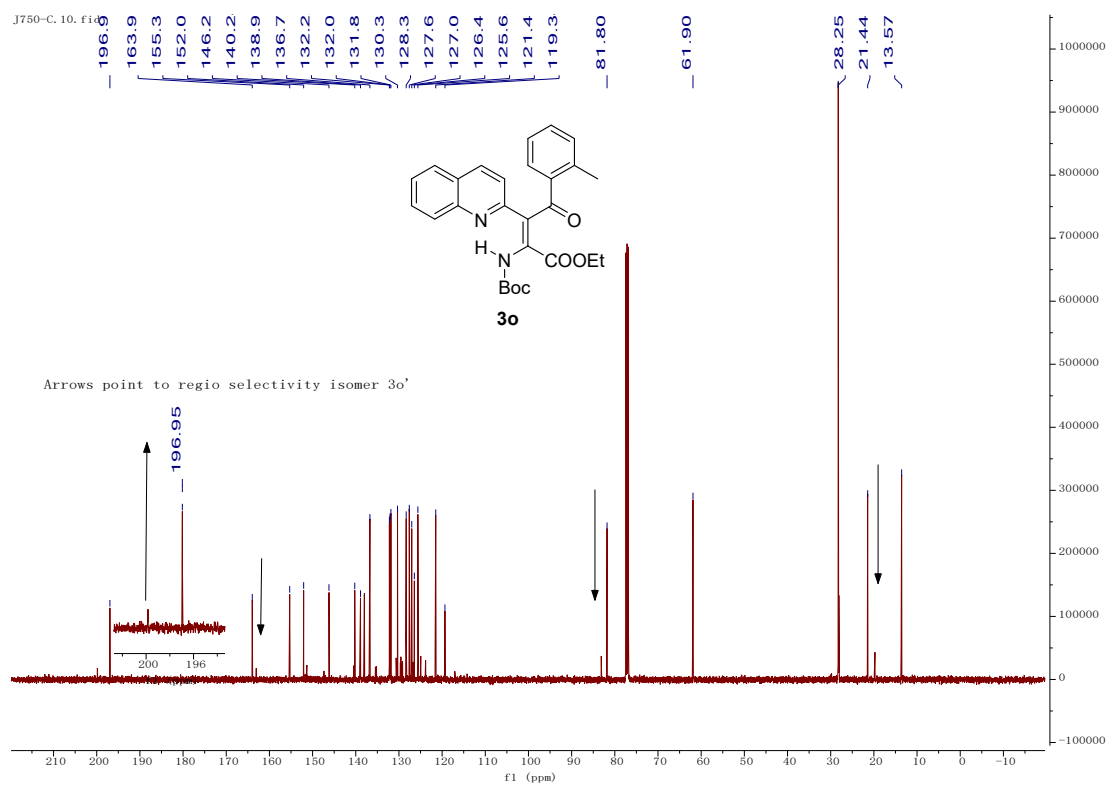

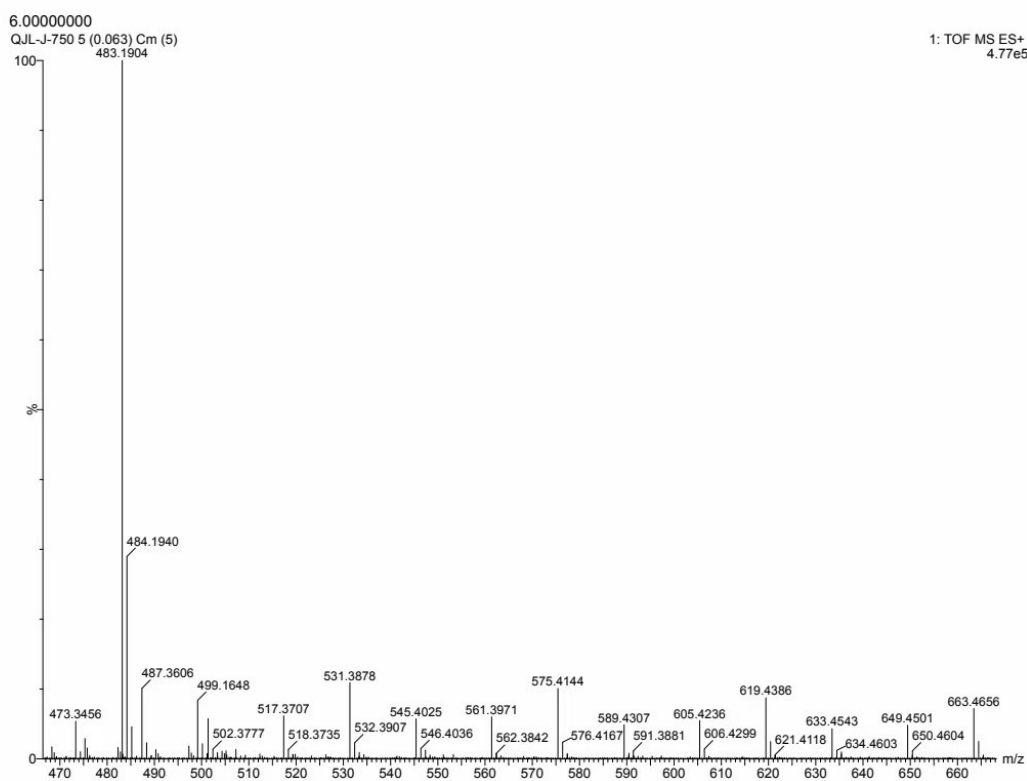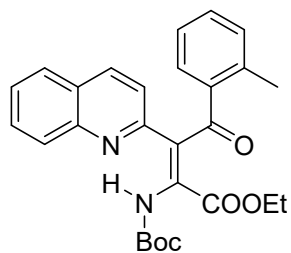

**3o**

Chemical Formula:  $C_{27}H_{28}N_2O_5$

Exact Mass: 460.1998

Molecular Weight: 460.5300

m/z: 460.1998 (100.0%), 461.2032 (29.2%), 462.2065 (4.1%), 462.2041 (1.0%)

Elemental Analysis: C, 70.42; H, 6.13; N, 6.08; O, 17.37

HRMS (ESI, m/z) calcd for  $C_{27}H_{28}N_2O_5$   $[M+Na]^+$  483.1891, found 483.1904.

3p'

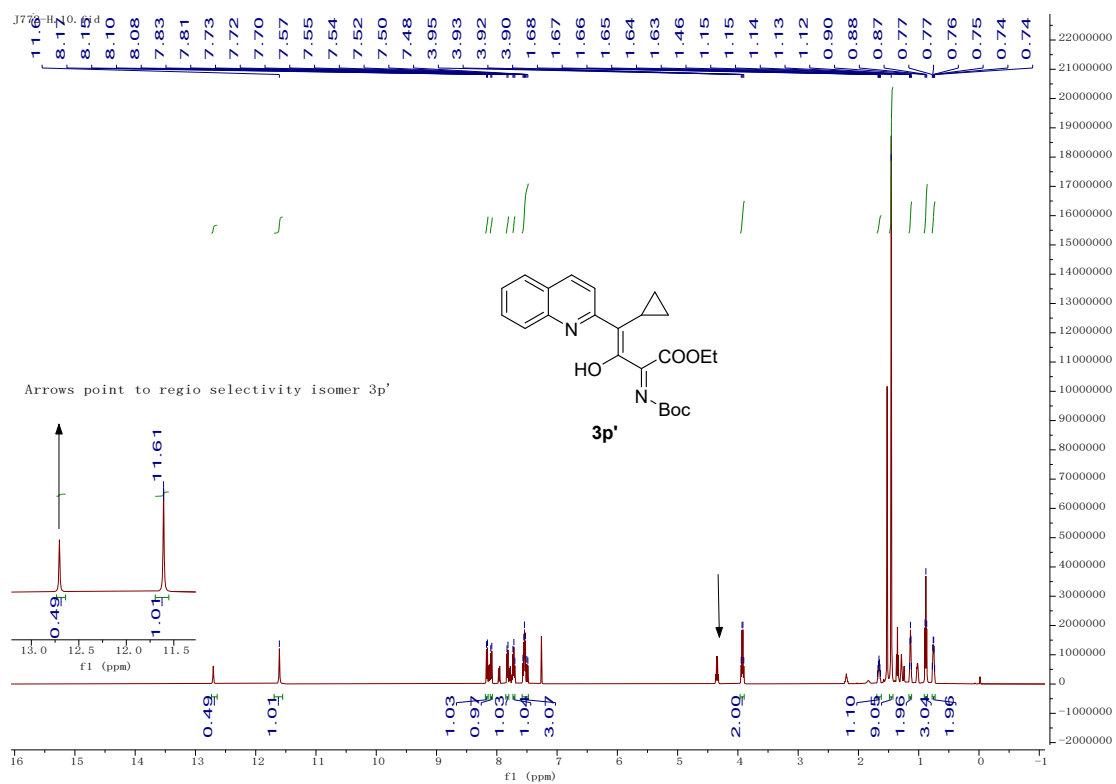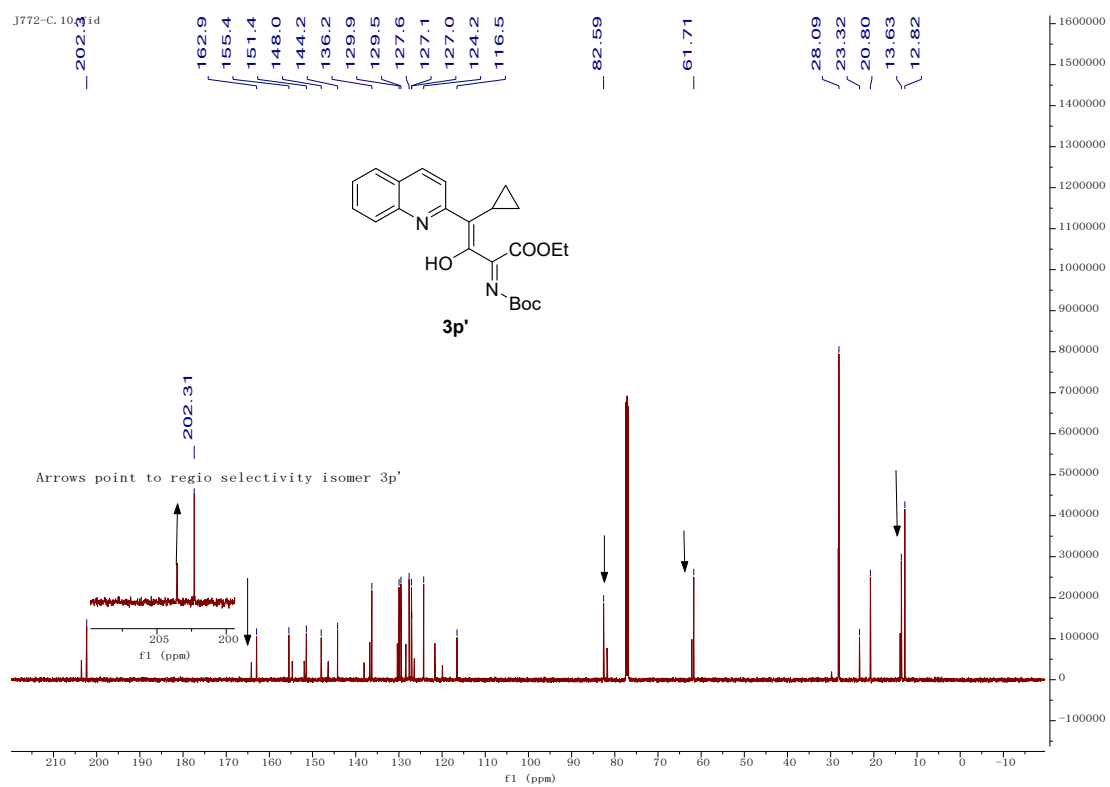

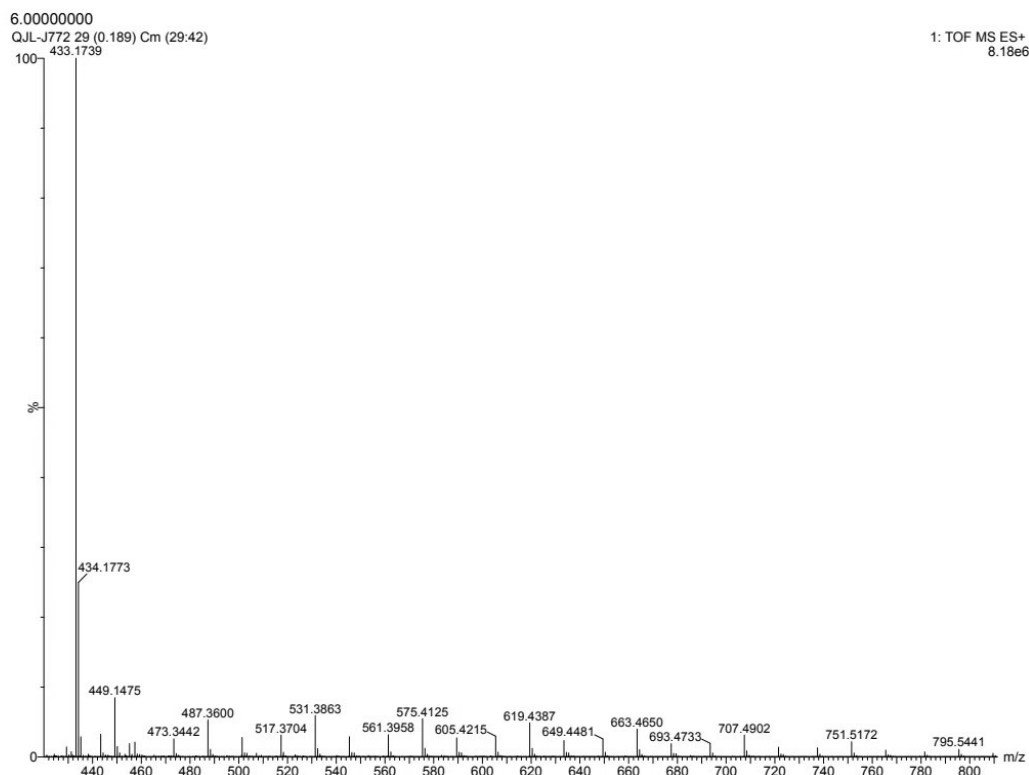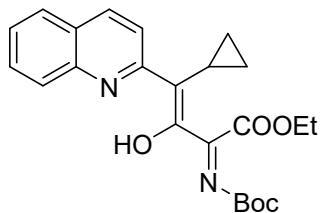

**3p'**

Chemical Formula:  $C_{23}H_{26}N_2O_5$

Exact Mass: 410.1842

Molecular Weight: 410.4700

m/z: 410.1842 (100.0%), 411.1875 (24.9%), 412.1909 (3.0%), 412.1884 (1.0%)

Elemental Analysis: C, 67.30; H, 6.38; N, 6.82; O, 19.49

HRMS (ESI, m/z) calcd for  $C_{23}H_{26}N_2O_5$   $[M+Na]^+$  433.1734, found 433.1739.

# 3q'

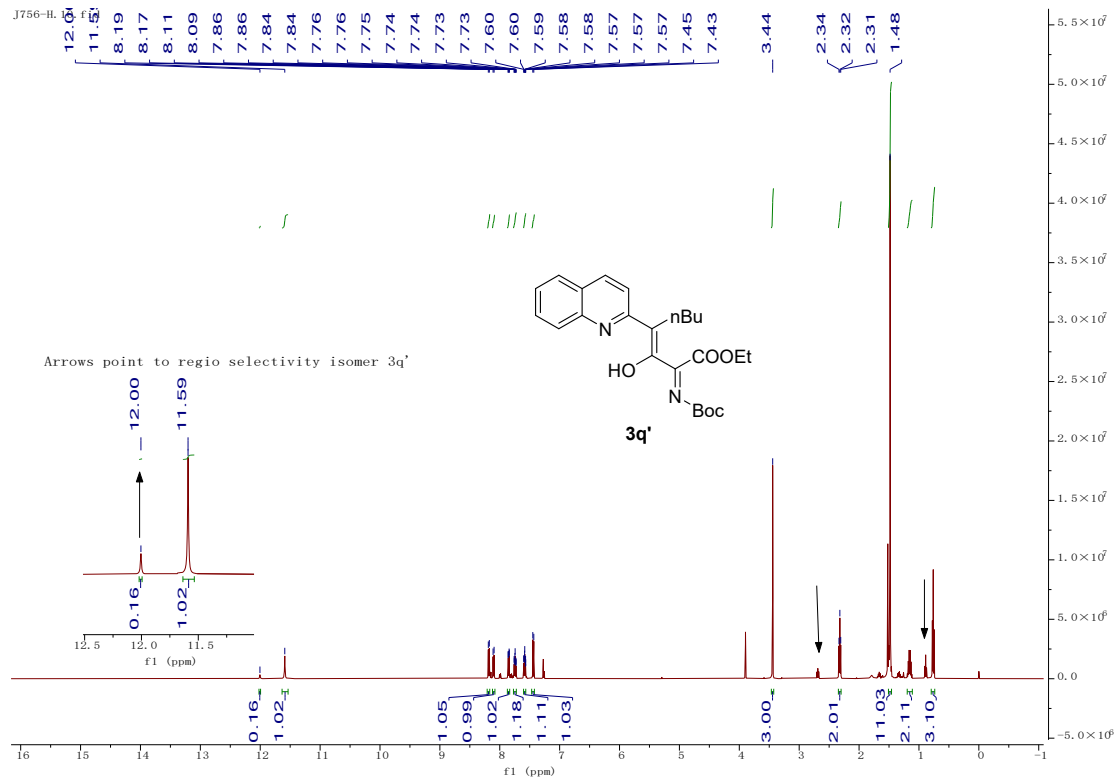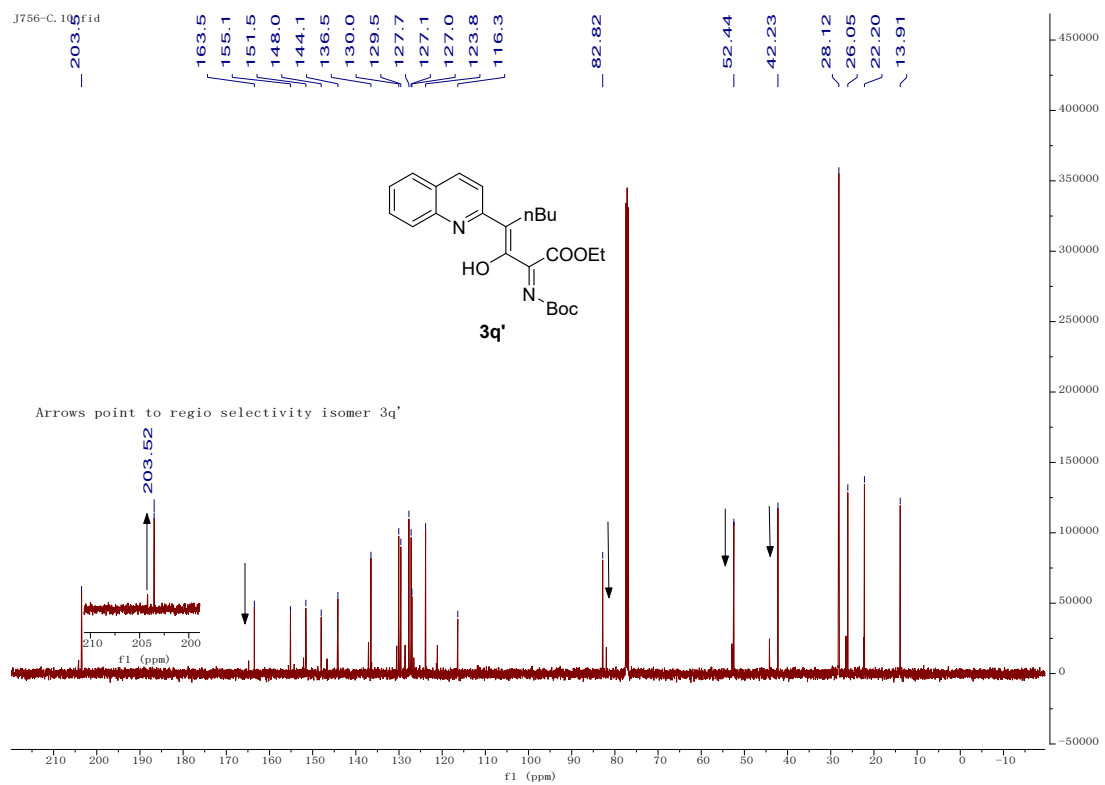

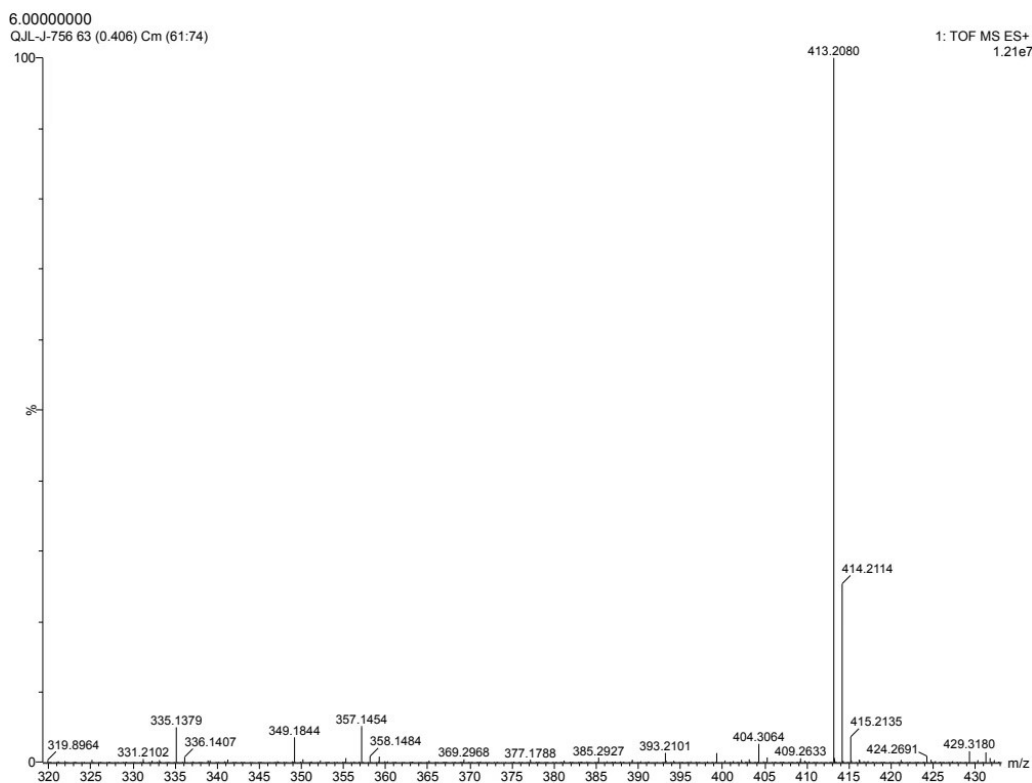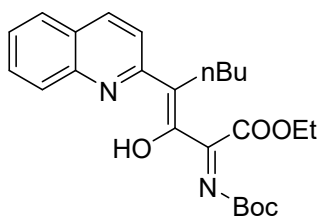

**3q'**

Chemical Formula:  $C_{23}H_{28}N_2O_5$

Exact Mass: 412.1998

Molecular Weight: 412.4860

m/z: 412.1998 (100.0%), 413.2032 (24.9%), 414.2065 (3.0%), 414.2041 (1.0%)

Elemental Analysis: C, 66.97; H, 6.84; N, 6.79; O, 19.39

HRMS (ESI, m/z) calcd for  $C_{23}H_{28}N_2O_5$   $[M+H]^+$  413.2071, found 413.2080.

**3r**

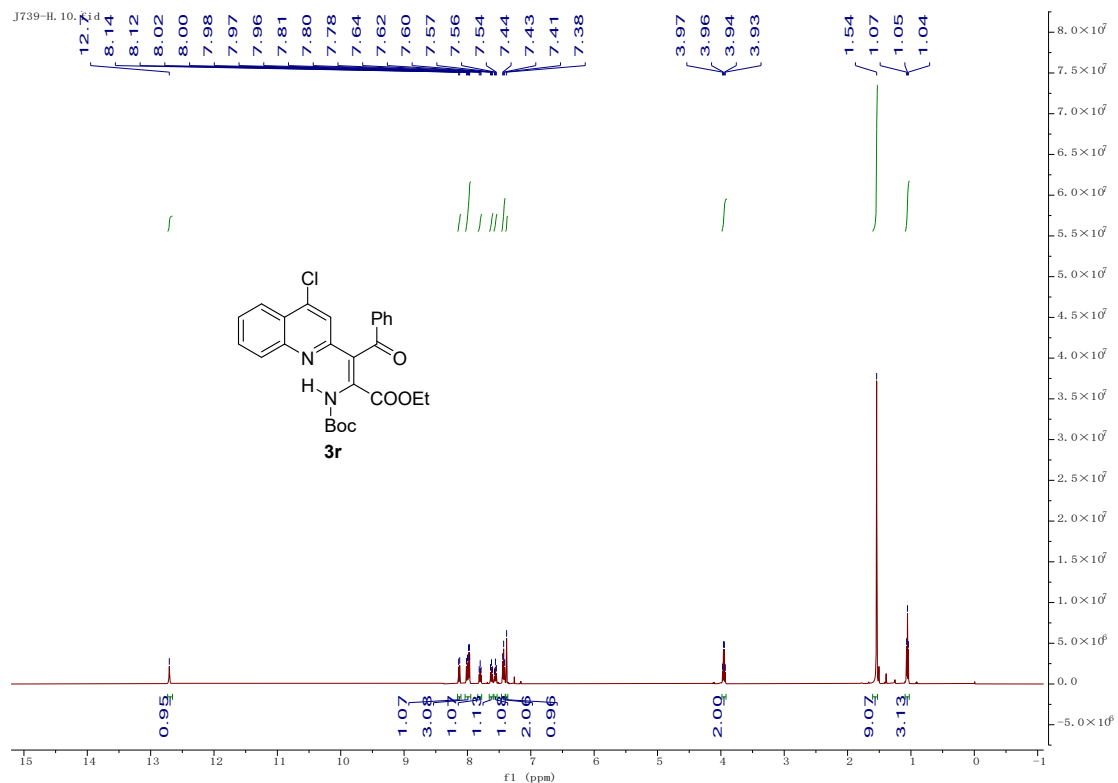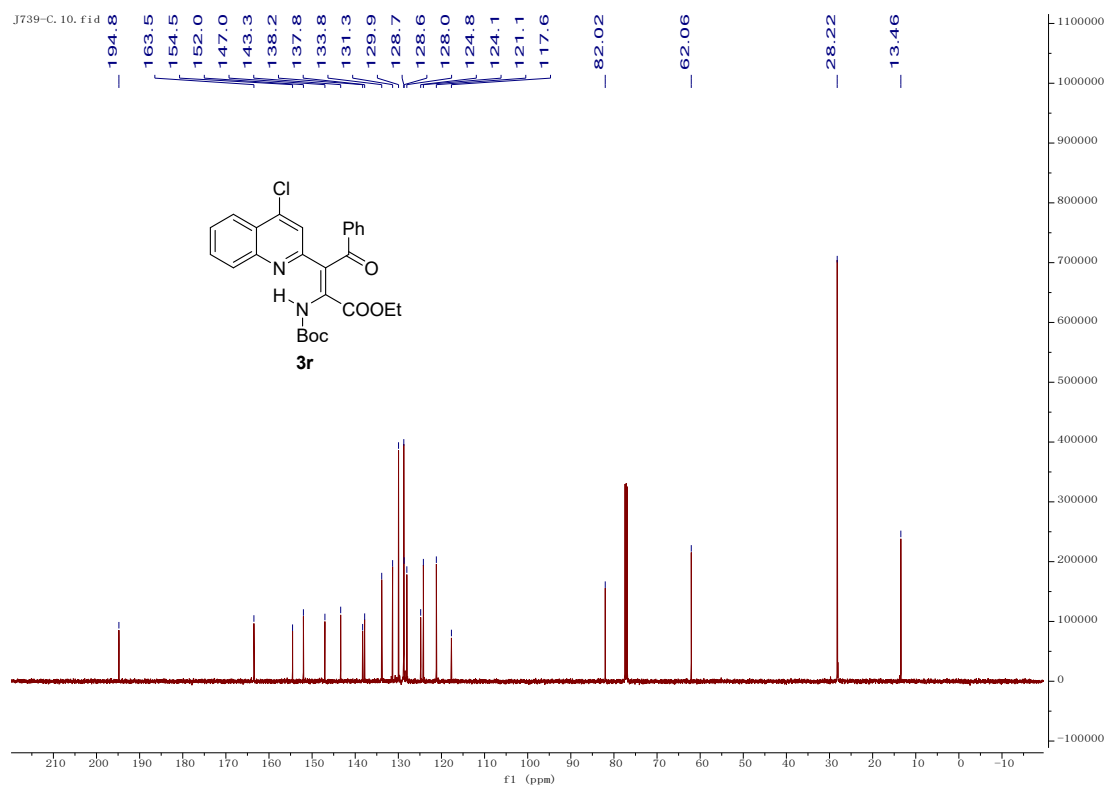

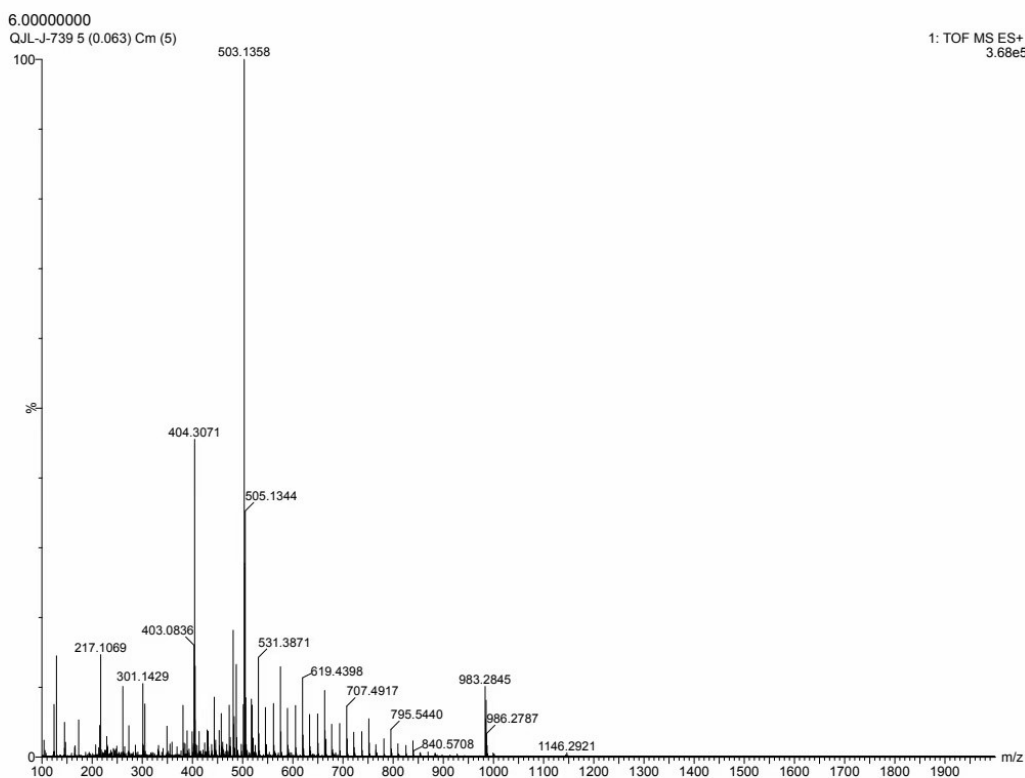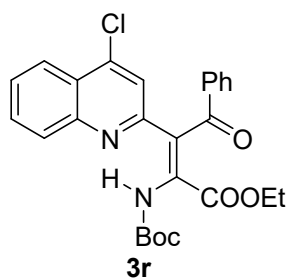

Chemical Formula:  $C_{26}H_{25}ClN_2O_5$

Exact Mass: 480.1452

Molecular Weight: 480.9450

m/z: 480.1452 (100.0%), 482.1422 (32.0%), 481.1486 (28.1%),  
483.1456 (9.0%), 482.1519 (3.8%), 484.1490 (1.2%), 482.1494 (1.0%)

Elemental Analysis: C, 64.93; H, 5.24; Cl, 7.37; N, 5.82; O, 16.63

HRMS (ESI, m/z) calcd for  $C_{26}H_{25}ClN_2O_5$   $[M+Na]^+$  503.1345, found 503.1358.

**3s**

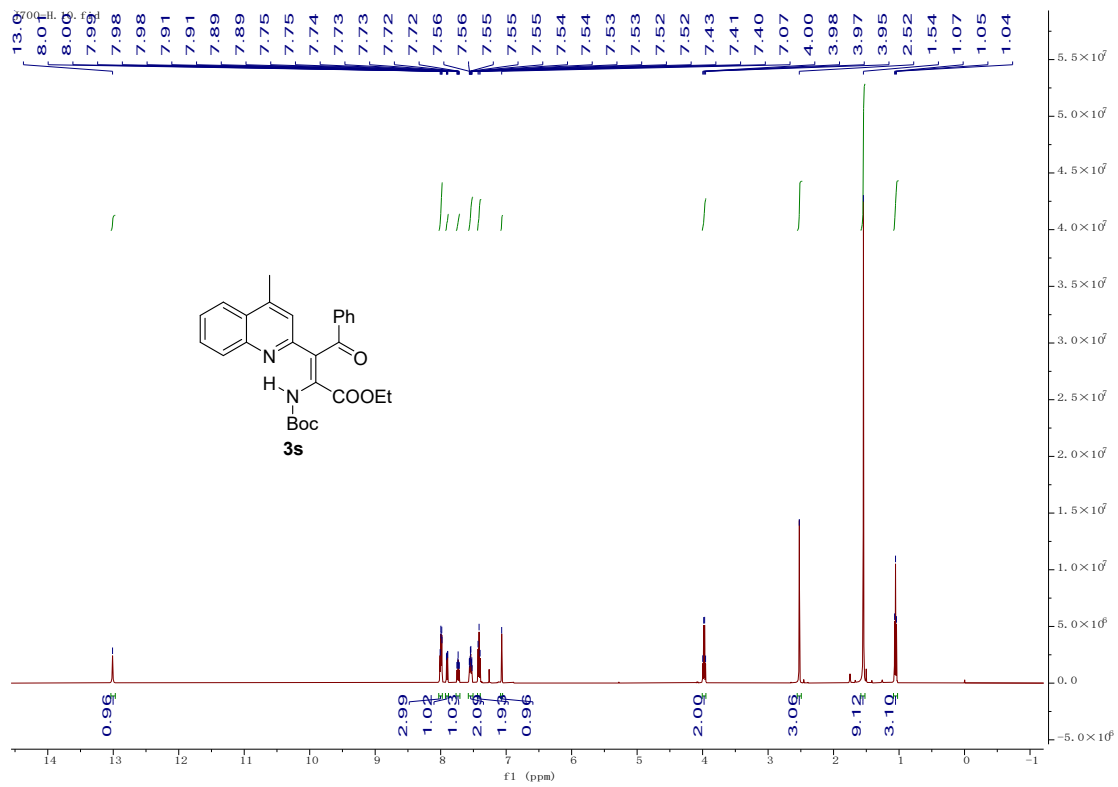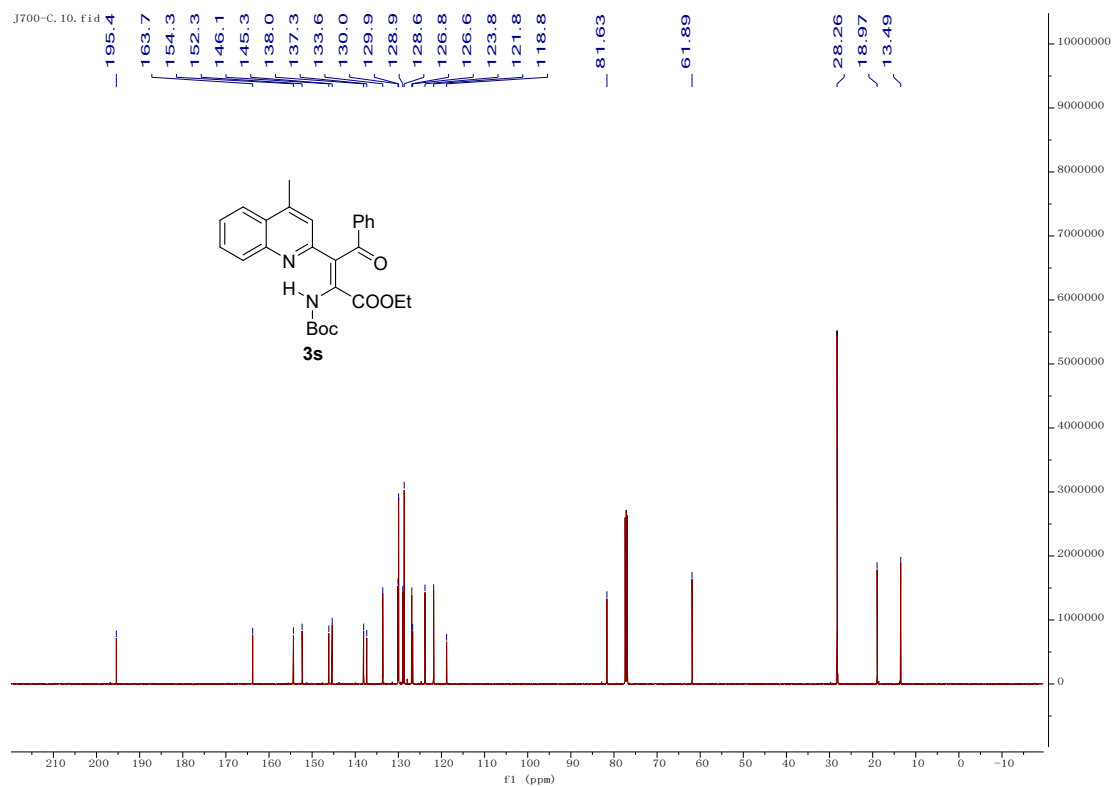

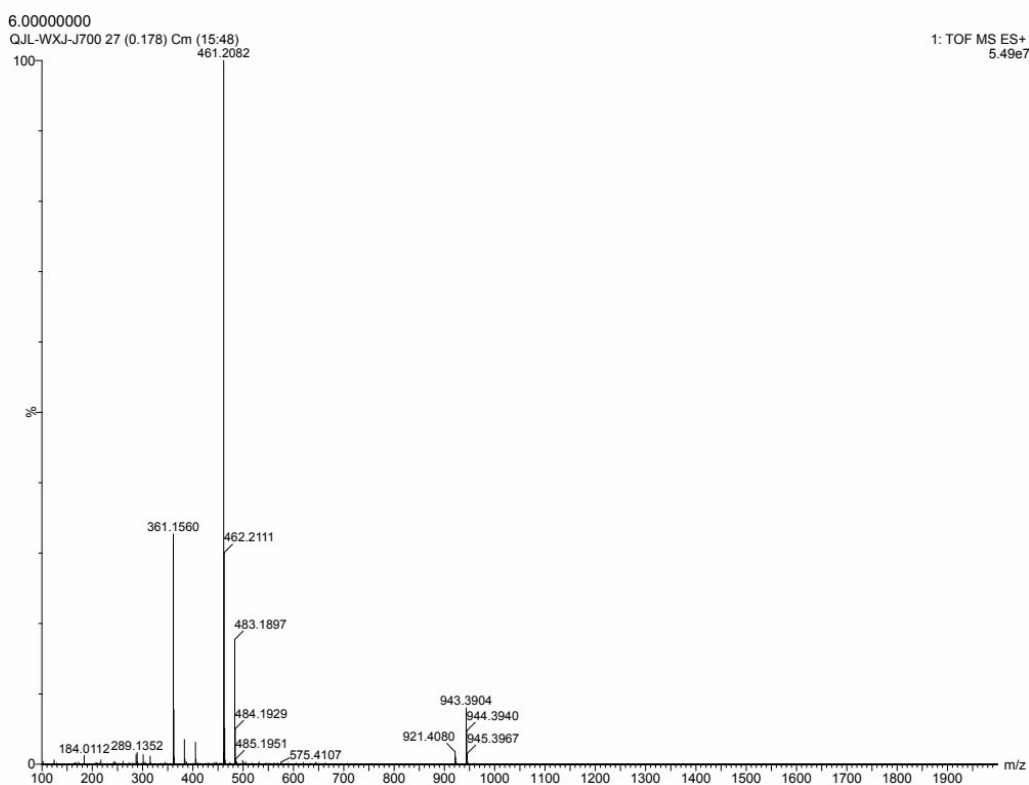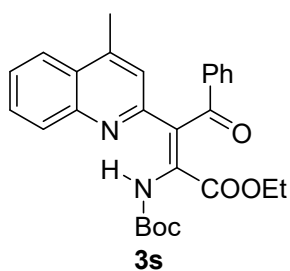

Chemical Formula:  $C_{27}H_{28}N_2O_5$

Exact Mass: 460.1998

Molecular Weight: 460.5300

m/z: 460.1998 (100.0%), 461.2032 (29.2%), 462.2065 (4.1%), 462.2041 (1.0%)

Elemental Analysis: C, 70.42; H, 6.13; N, 6.08; O, 17.37

HRMS (ESI, m/z) calcd for  $C_{27}H_{28}N_2O_5$   $[M+H]^+$  461.2071, found 461.2082.

# 3t

J708-2-H.10.fid

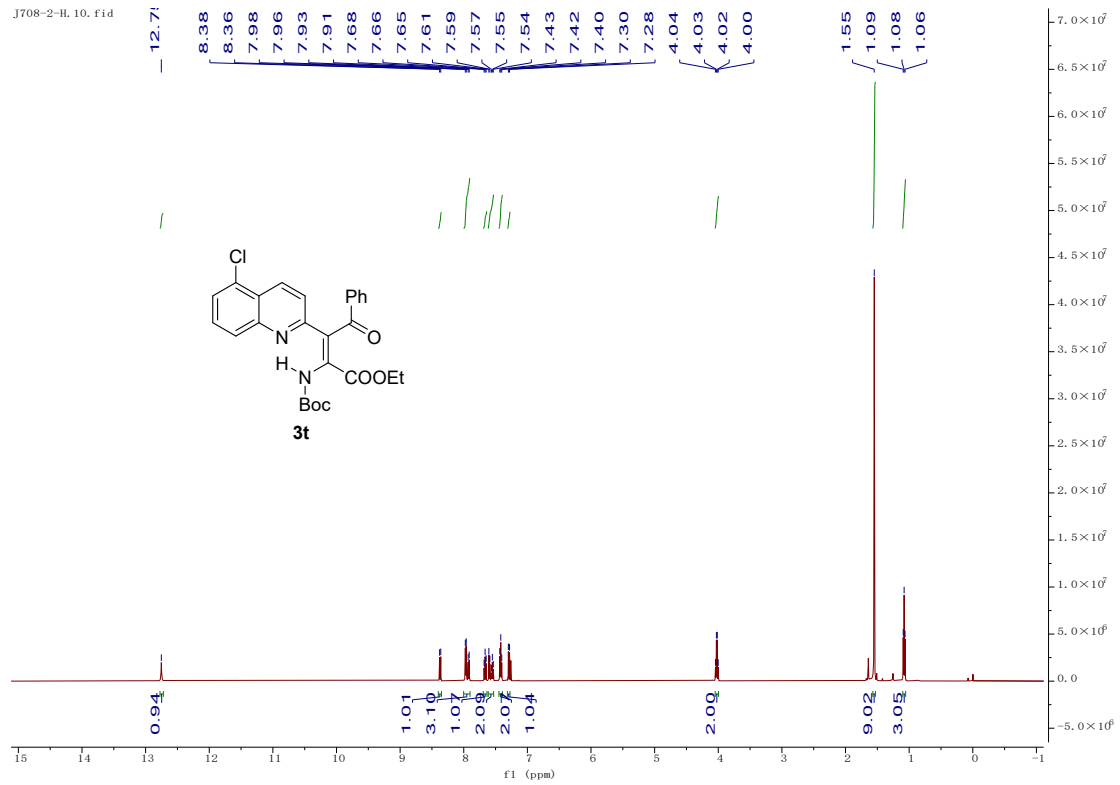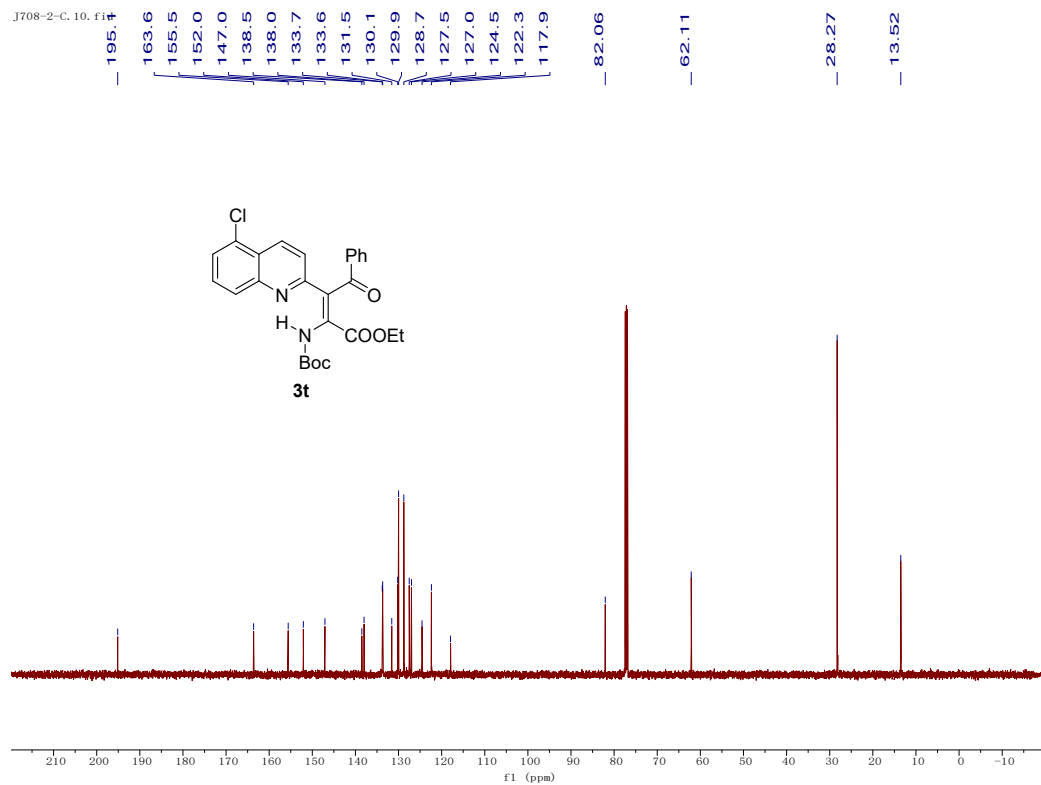

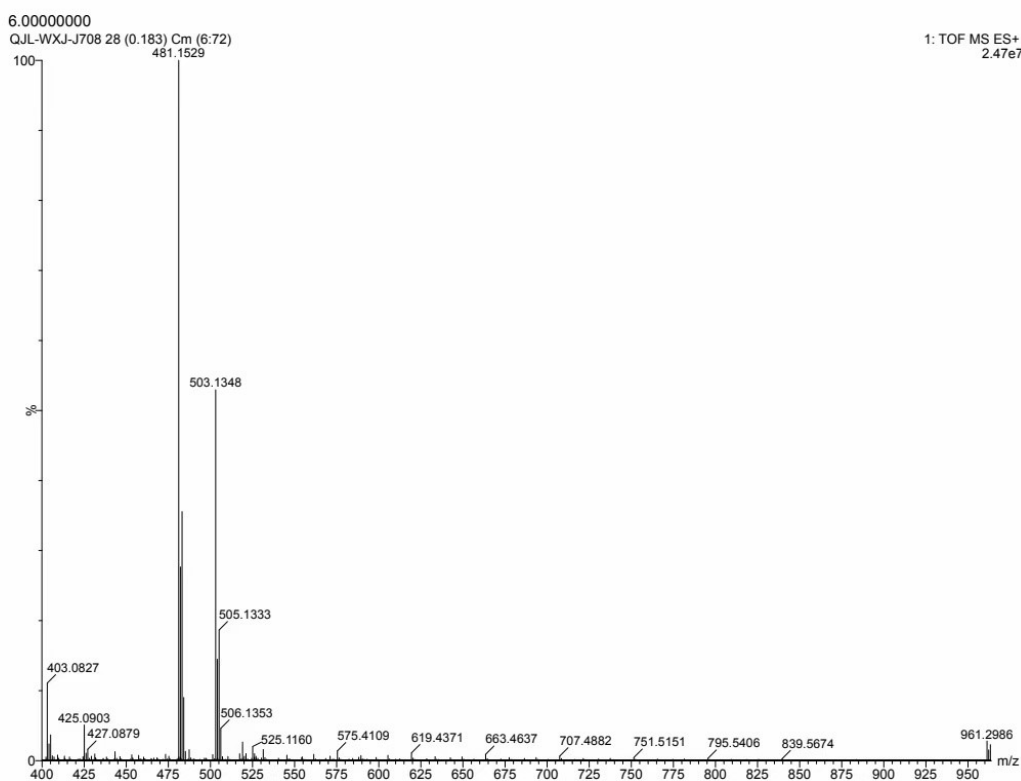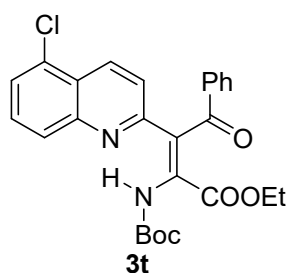

Chemical Formula:  $C_{26}H_{25}ClN_2O_5$

Exact Mass: 480.1452

Molecular Weight: 480.9450

m/z: 480.1452 (100.0%), 482.1422 (32.0%), 481.1486 (28.1%),  
 483.1456 (9.0%), 482.1519 (3.8%), 484.1490 (1.2%), 482.1494 (1.0%)

Elemental Analysis: C, 64.93; H, 5.24; Cl, 7.37; N, 5.82; O, 16.63

HRMS (ESI, m/z) calcd for  $C_{26}H_{25}ClN_2O_5$   $[M+H]^+$  481.1525, found 481.1529.

# 3u

J701-H, 10, fid

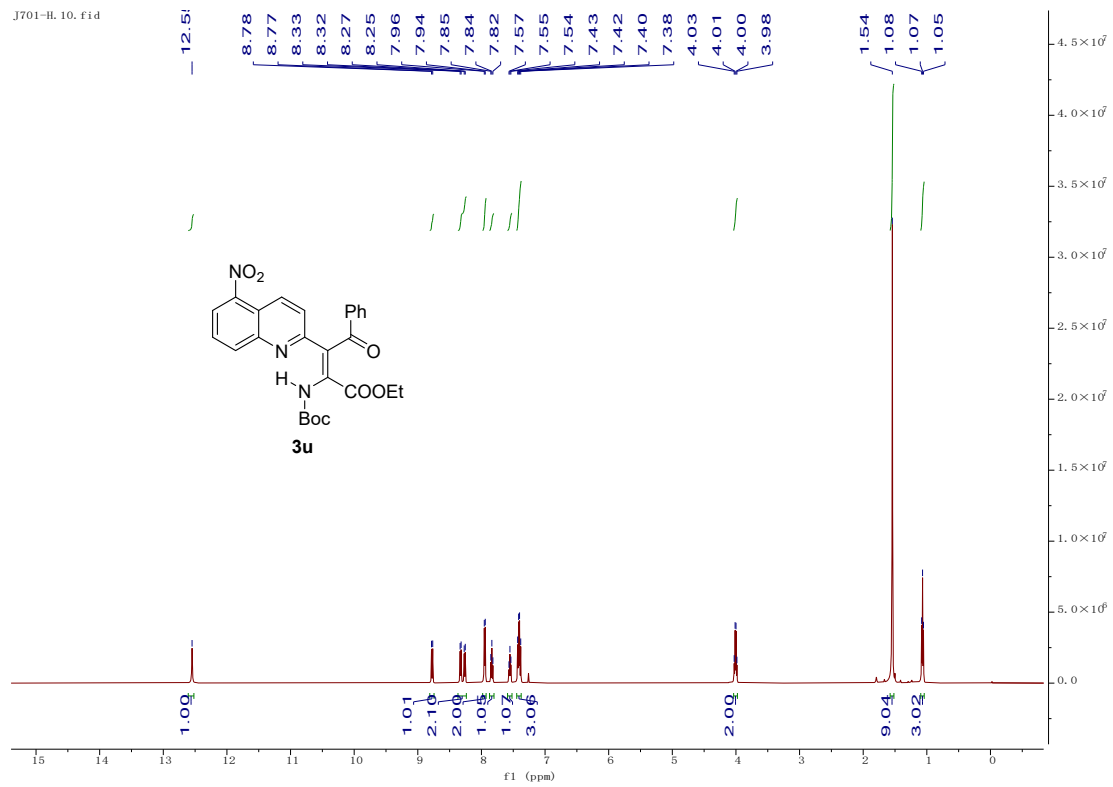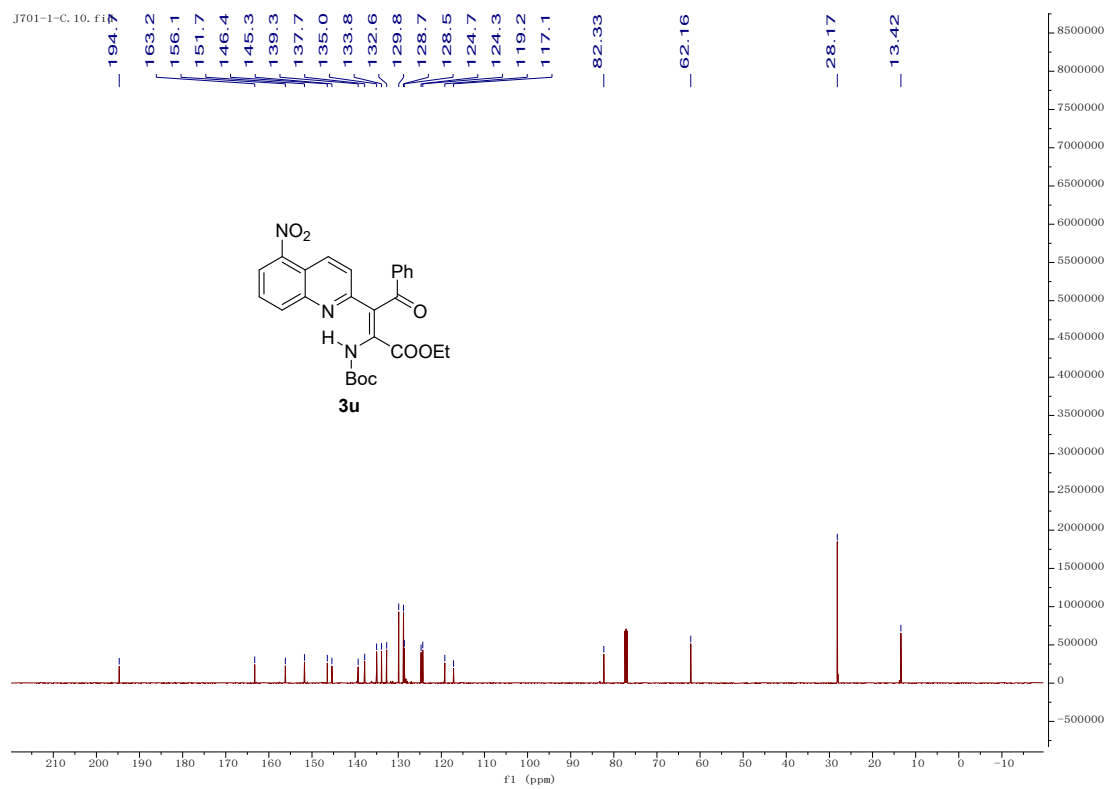

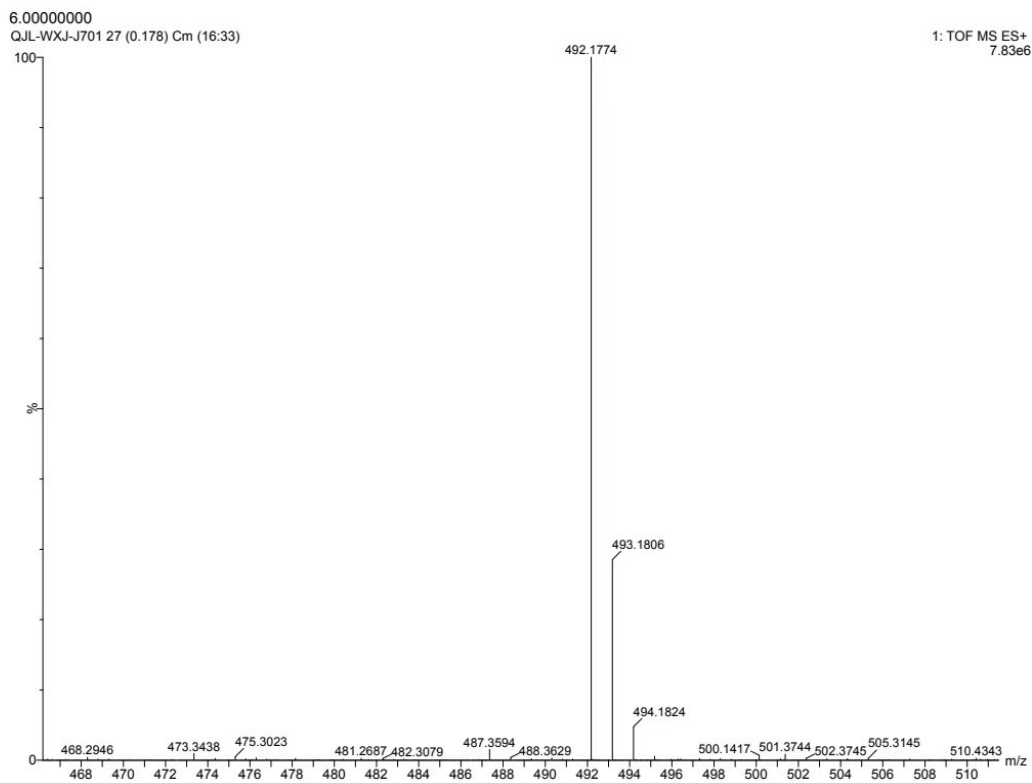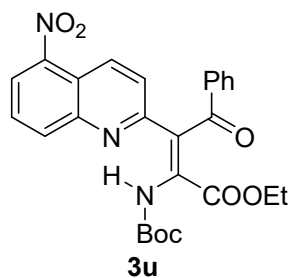

Chemical Formula:  $C_{26}H_{25}N_3O_7$

Exact Mass: 491.1693

Molecular Weight: 491.5000

m/z: 491.1693 (100.0%), 492.1726 (28.1%), 493.1760 (3.8%), 493.1735 (1.4%), 492.1663 (1.1%)

Elemental Analysis: C, 63.54; H, 5.13; N, 8.55; O, 22.79

HR

MS (ESI, m/z) calcd for  $C_{26}H_{25}N_3O_7$   $[M+H]^+$  492.1766, found 492.1774.

# 3v

J837-H, 10, f1.d

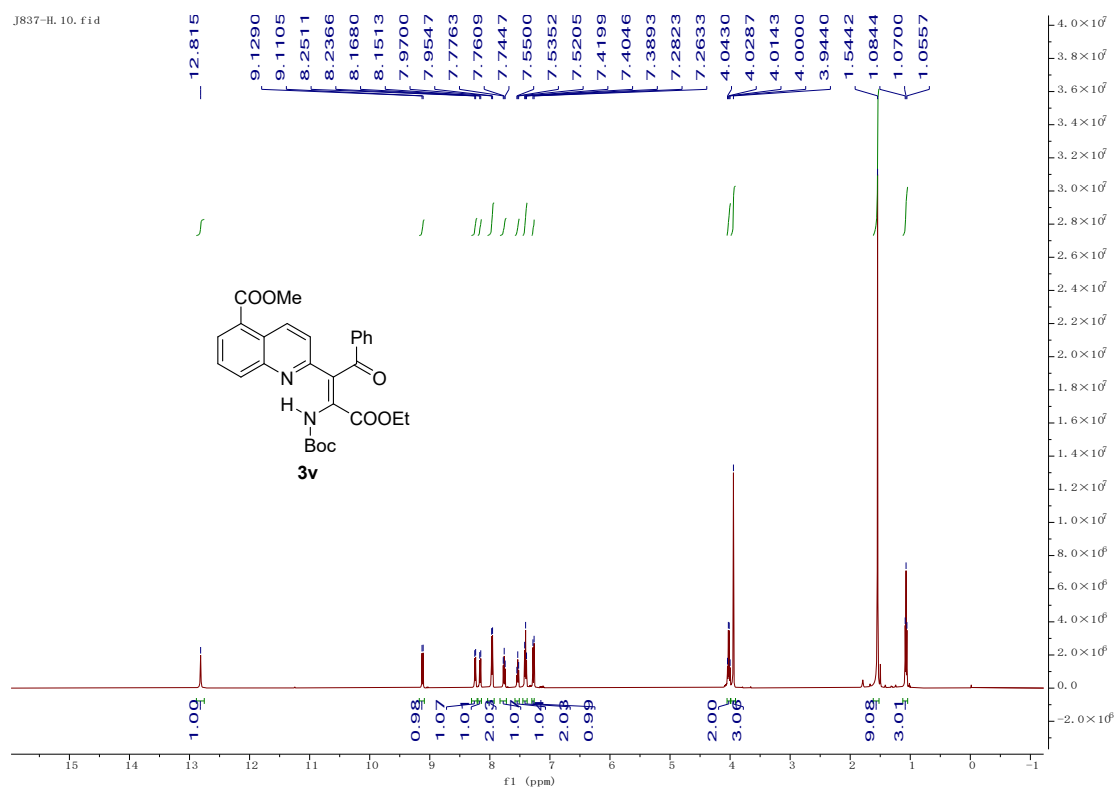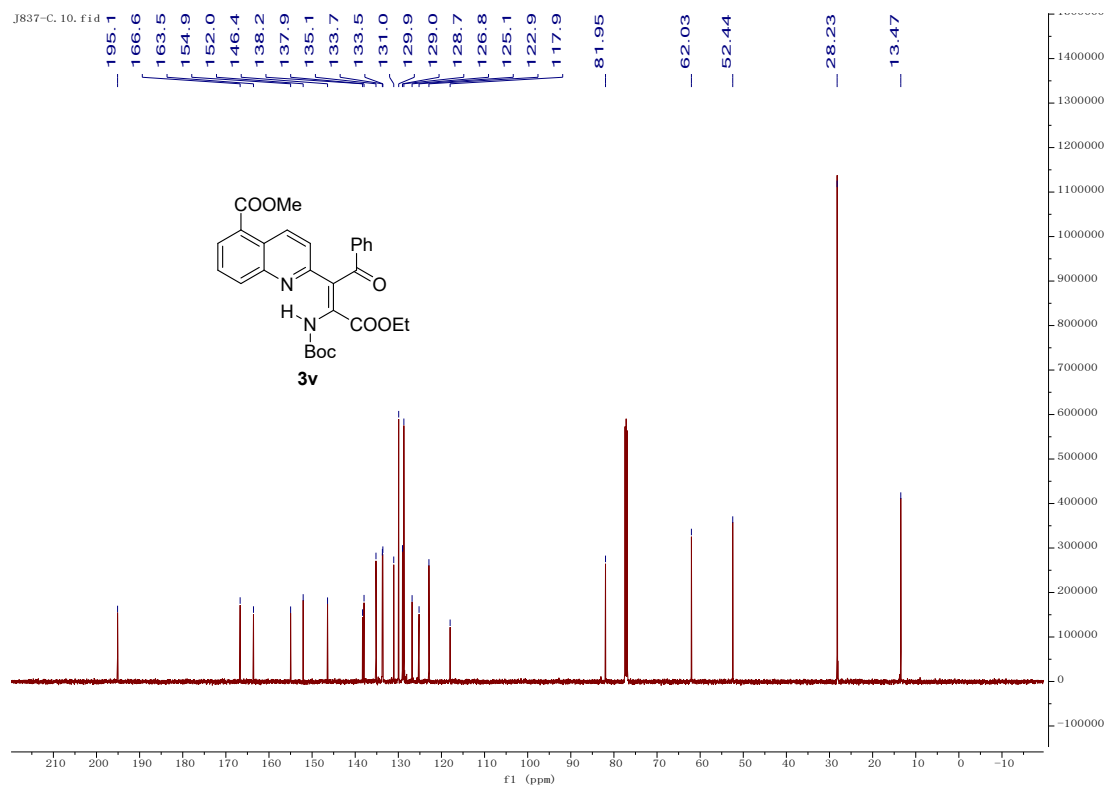

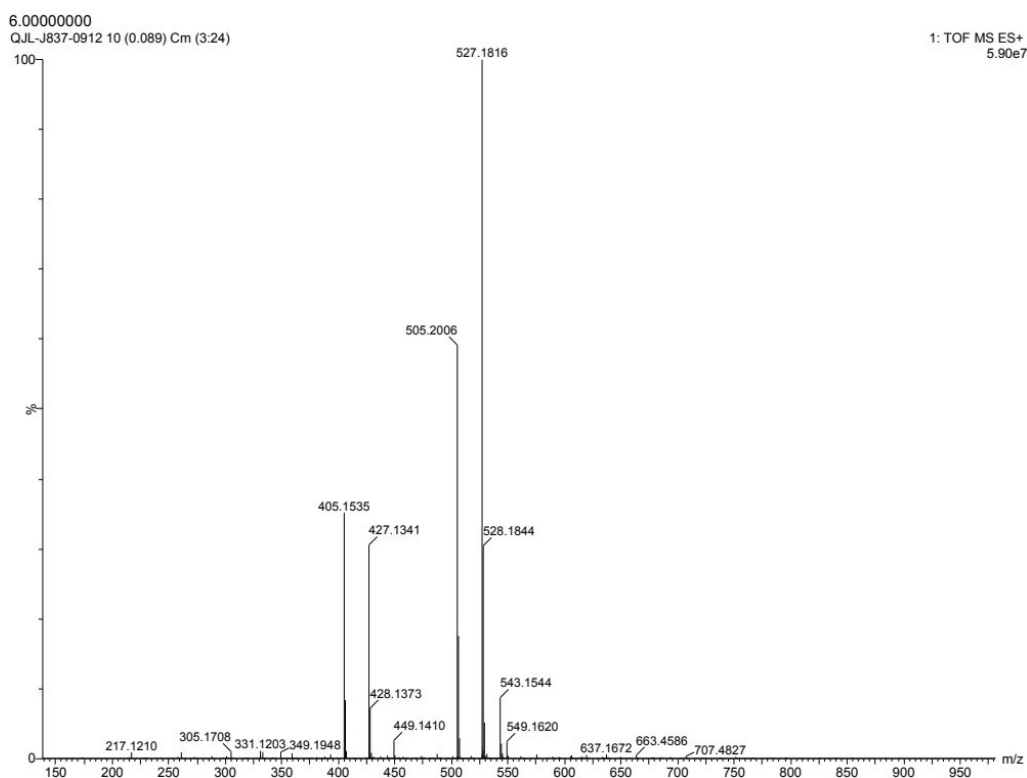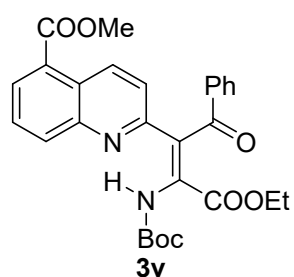

Chemical Formula:  $C_{28}H_{28}N_2O_7$

Exact Mass: 504.1897

Molecular Weight: 504.5390

m/z: 504.1897 (100.0%), 505.1930 (30.3%), 506.1964 (4.4%), 506.1939 (1.4%)

Elemental Analysis: C, 66.66; H, 5.59; N, 5.55; O, 22.20

HRMS (ESI, m/z) calcd for  $C_{28}H_{28}N_2O_7 [M+Na]^+$  527.1789, found 527.1816.

**3w**

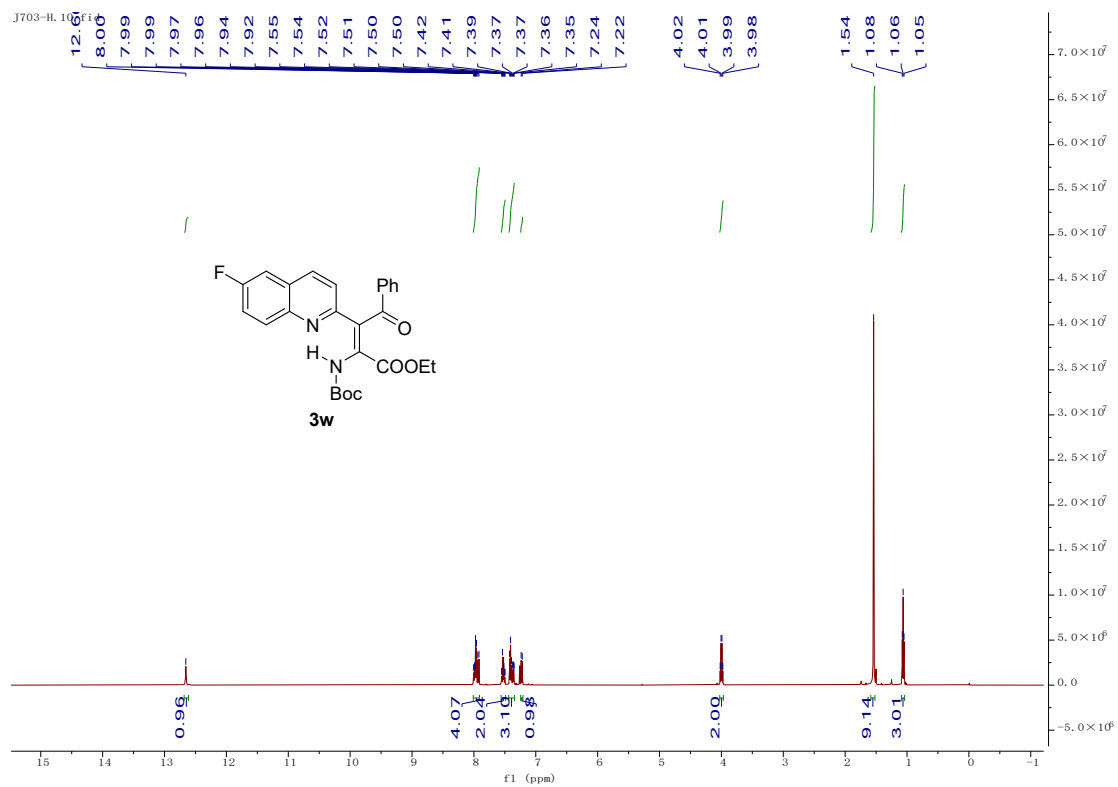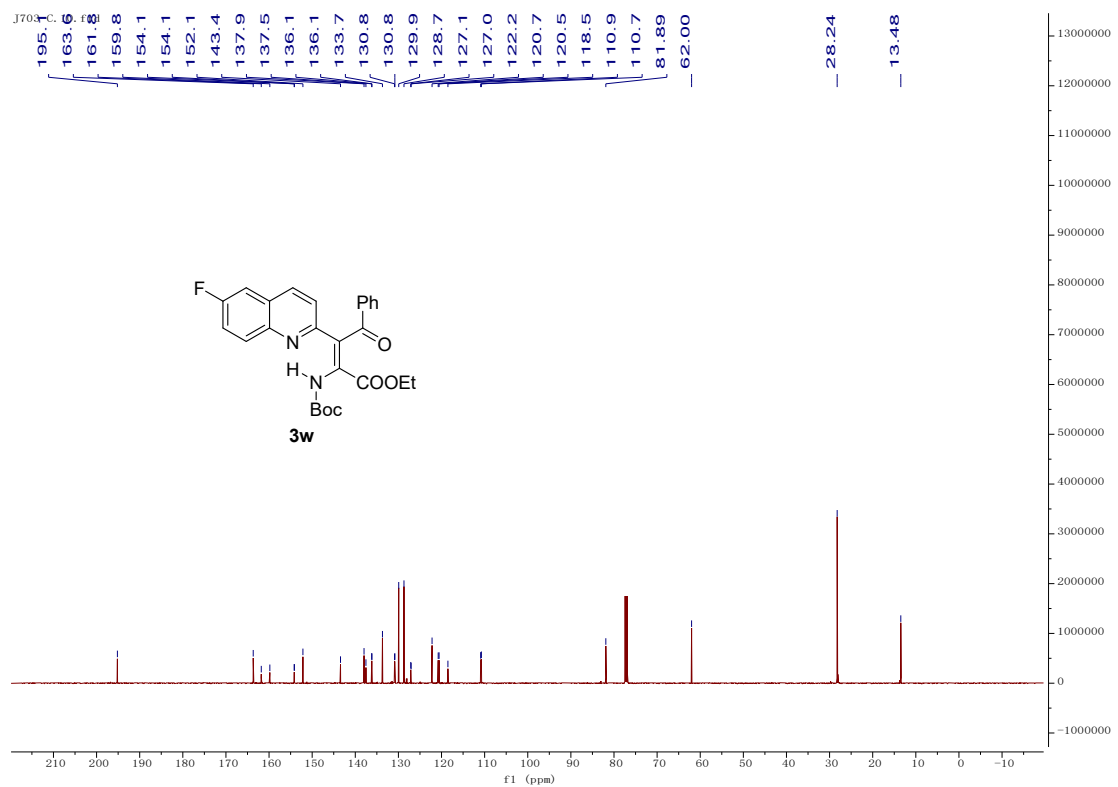

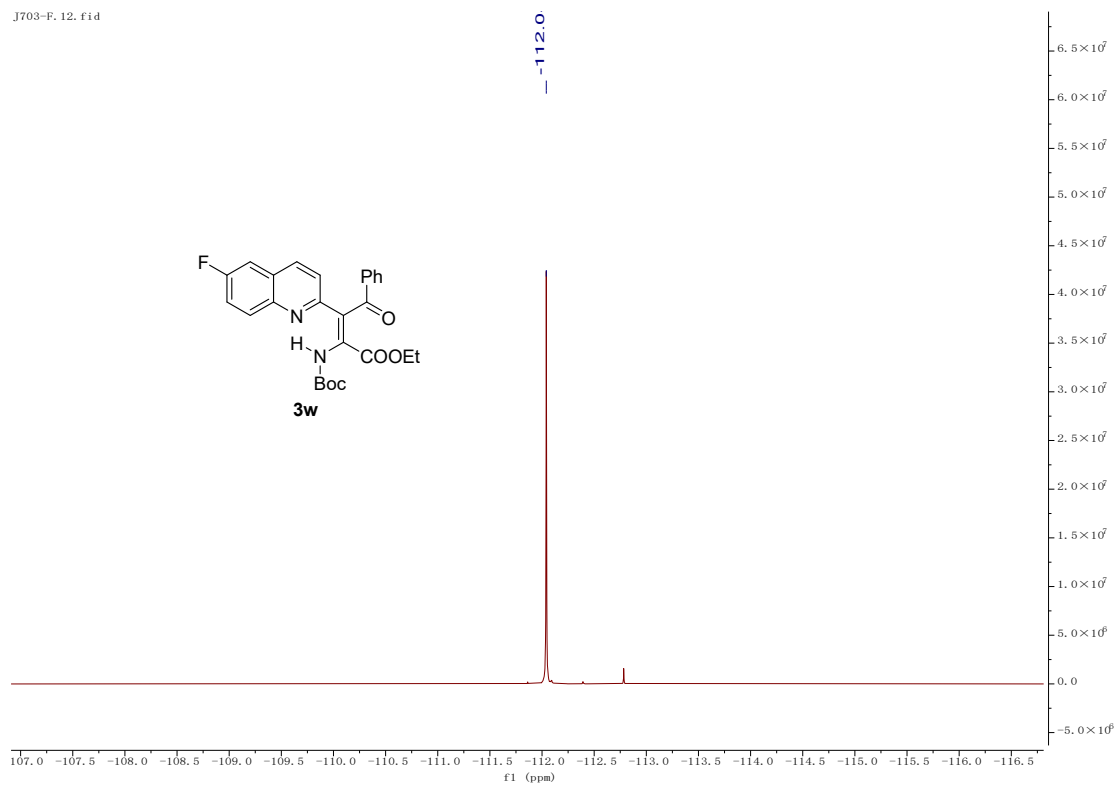

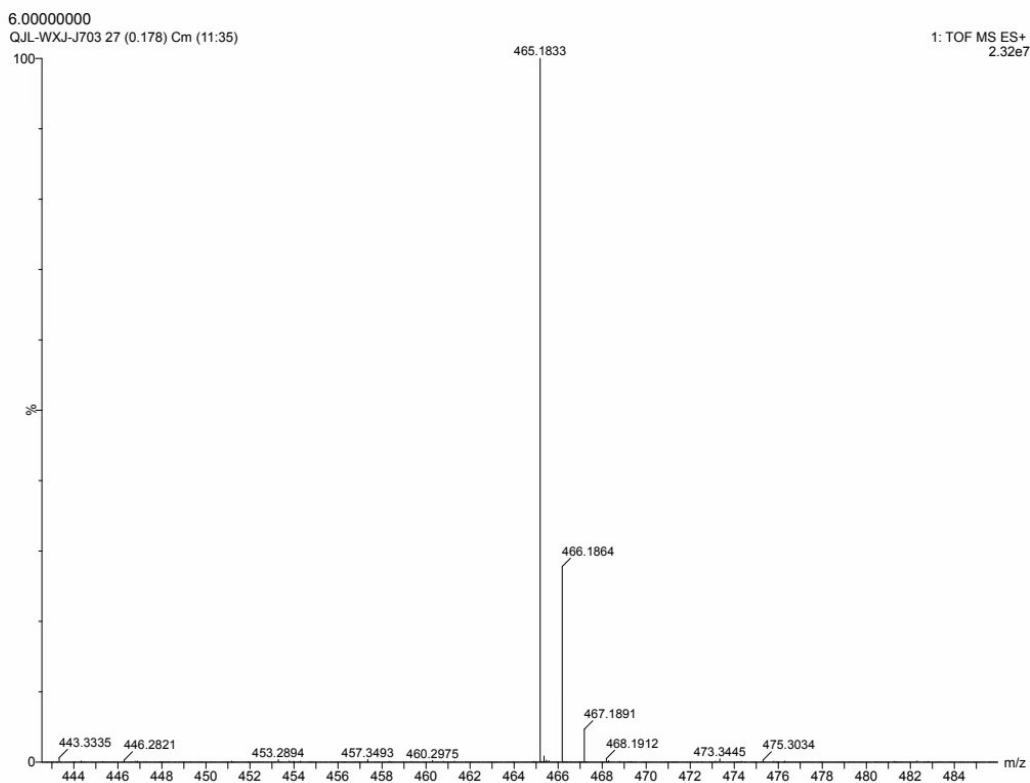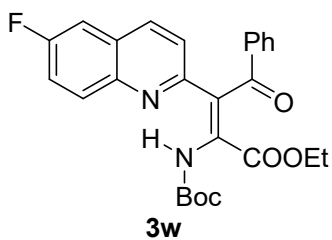

Chemical Formula:  $C_{26}H_{25}FN_2O_5$

Exact Mass: 464.1748

Molecular Weight: 464.4934

m/z: 464.1748 (100.0%), 465.1781 (28.1%), 466.1815 (3.8%), 466.1790 (1.0%)

Elemental Analysis: C, 67.23; H, 5.43; F, 4.09; N, 6.03; O, 17.22

HRMS (ESI, m/z) calcd for  $C_{26}H_{25}FN_2O_5$   $[M+H]^+$  465.1821, found 465.1833.



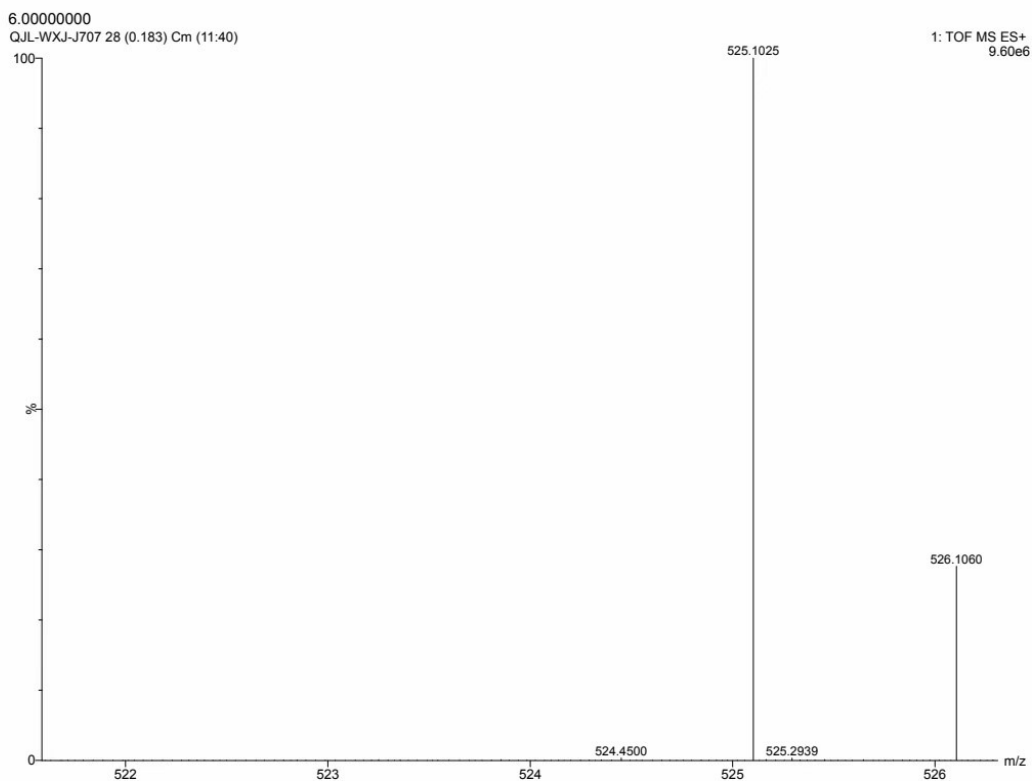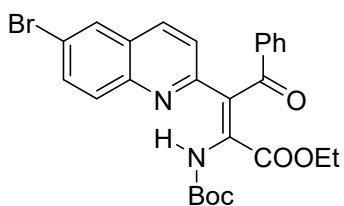

**3x**

Chemical Formula:  $C_{26}H_{25}BrN_2O_5$

Exact Mass: 524.0947

Molecular Weight: 525.3990

m/z: 524.0947 (100.0%), 526.0926 (97.3%), 525.0980 (28.1%),

527.0960 (27.4%), 526.1014 (3.8%), 528.0993 (3.7%), 526.0989 (1.0%), 528.0969 (1.0%)

Elemental Analysis: C, 59.44; H, 4.80; Br, 15.21; N, 5.33; O, 15.23

HRMS (ESI, m/z) calcd for  $C_{26}H_{25}BrN_2O_5$   $[M+H]^+$  525.1020, found 525.1025.

3y

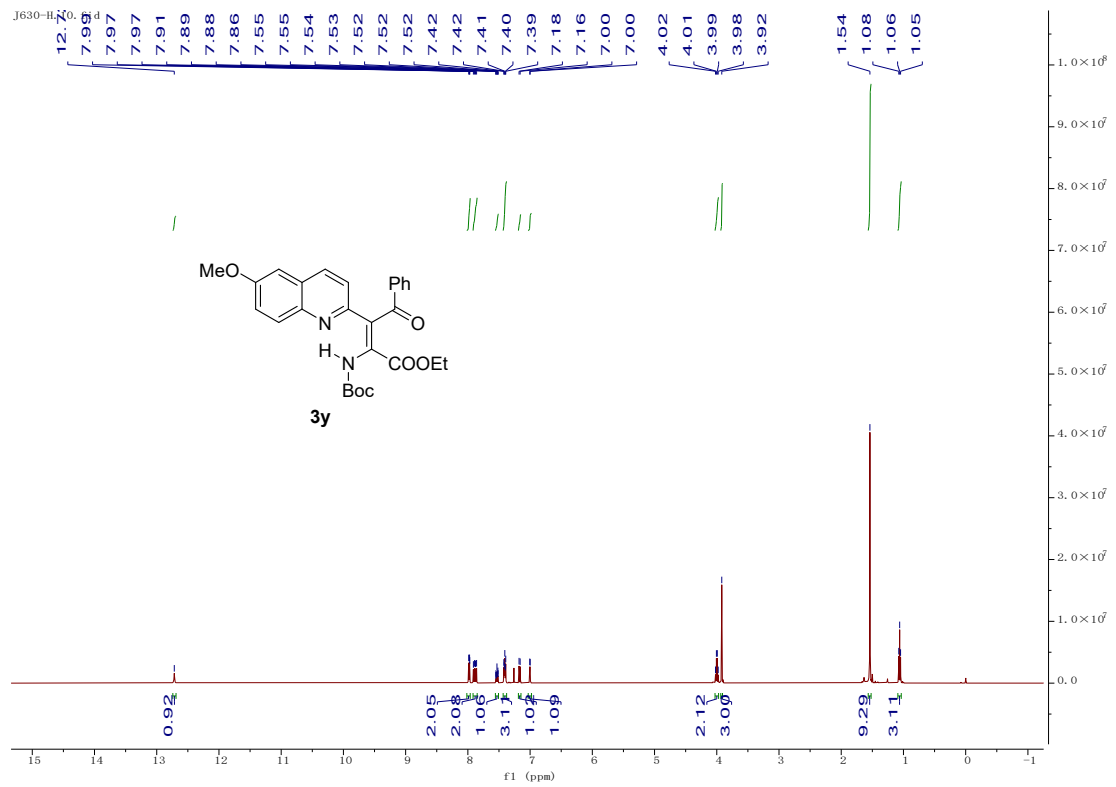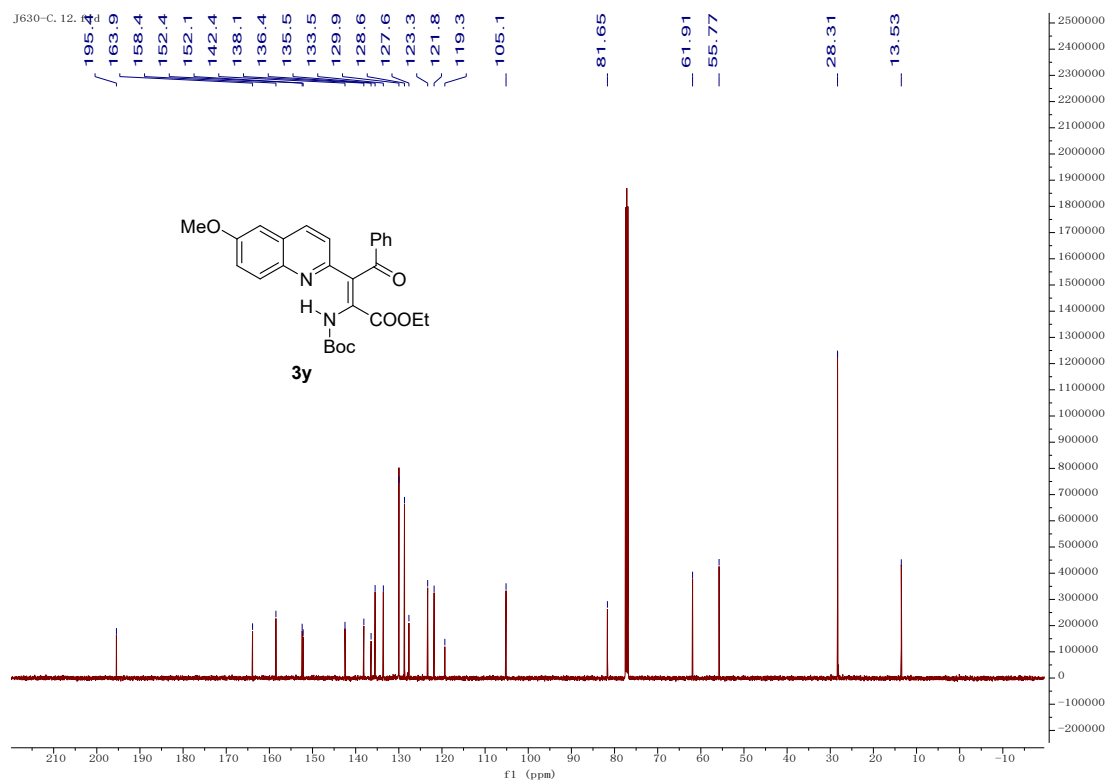

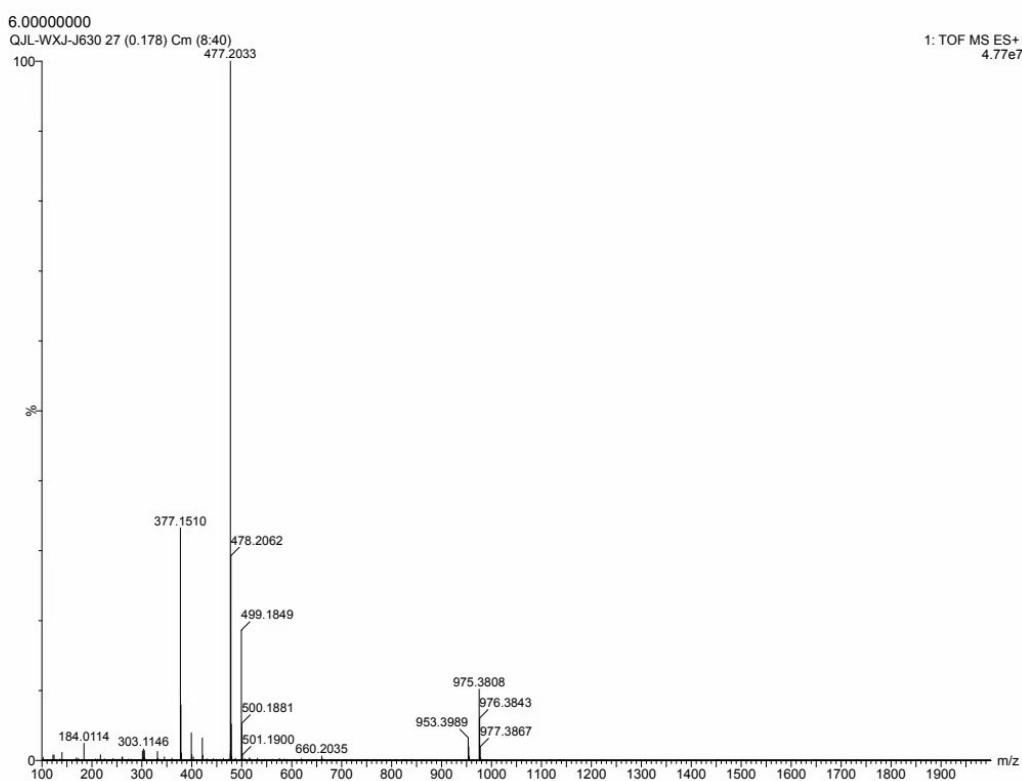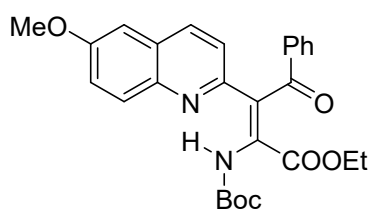

**3y**

Chemical Formula:  $C_{27}H_{28}N_2O_6$

Exact Mass: 476.1947

Molecular Weight: 476.5290

m/z: 476.1947 (100.0%), 477.1981 (29.2%), 478.2014 (4.1%), 478.1990 (1.2%)

Elemental Analysis: C, 68.05; H, 5.92; N, 5.88; O, 20.14

HRMS (ESI, m/z) calcd for  $C_{27}H_{28}N_2O_6$  [M+H]<sup>+</sup> 477.2021, found 477.2033

# 3z

J740-H, 10, f1.d

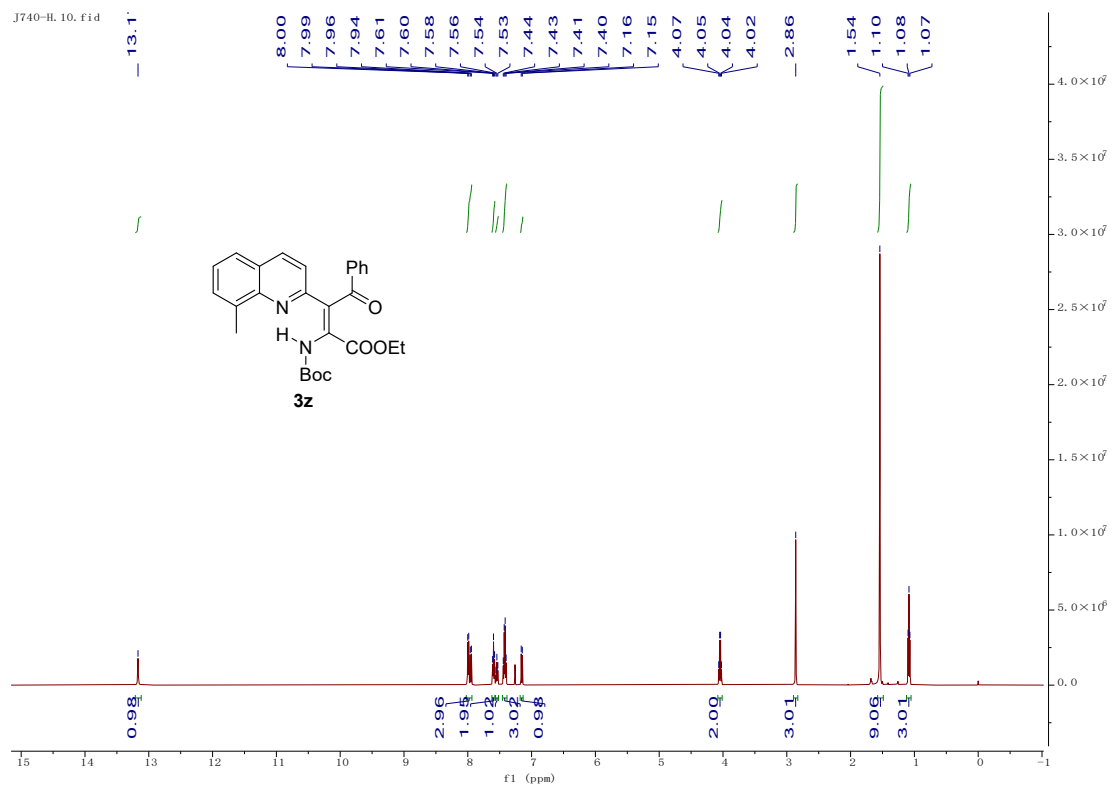

J740-C, 10, f1.d

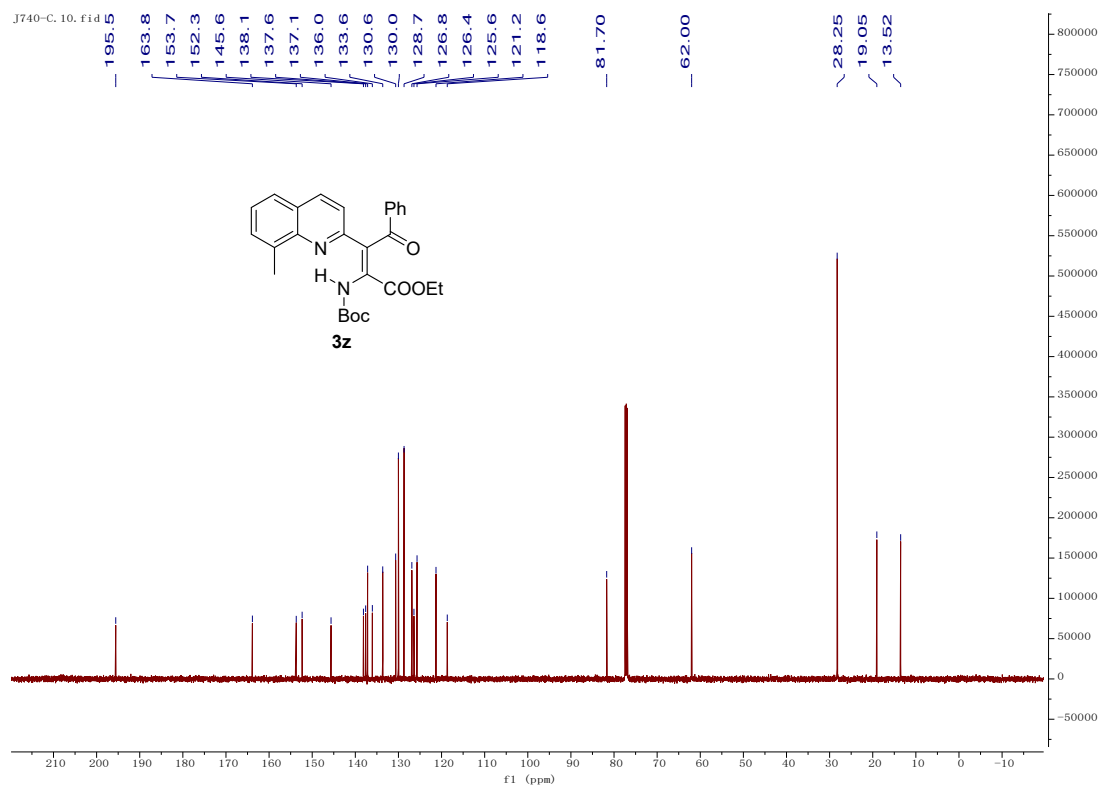

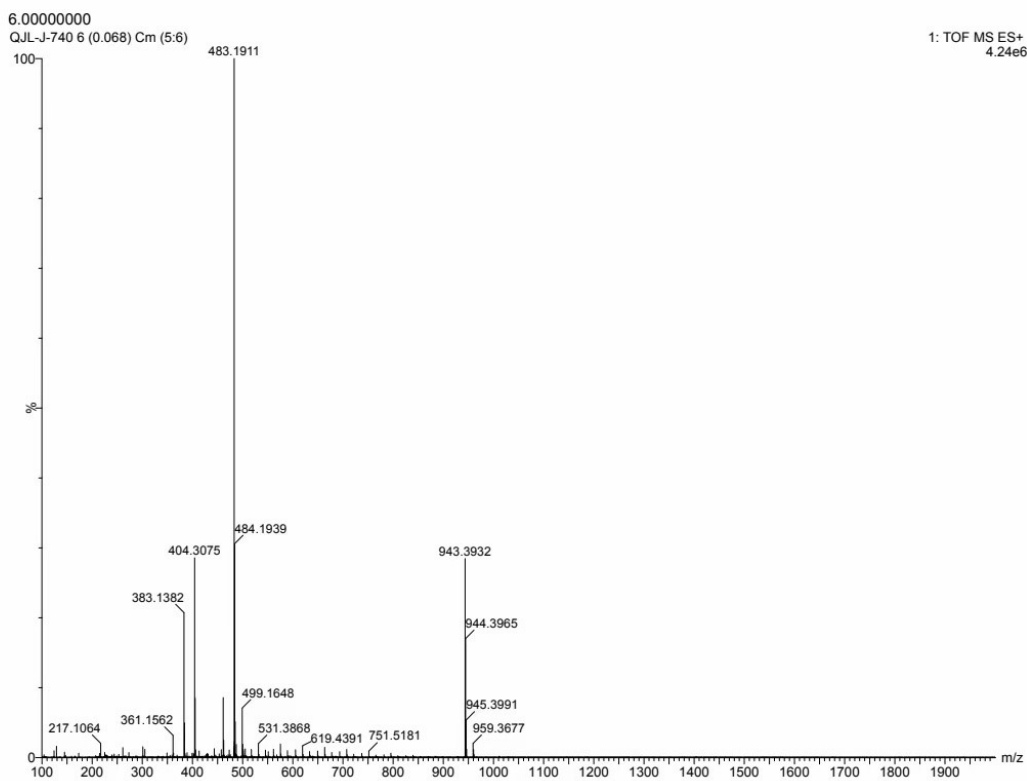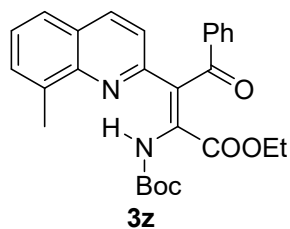

Chemical Formula:  $C_{27}H_{28}N_2O_5$

Exact Mass: 460.1998

Molecular Weight: 460.5300

m/z: 460.1998 (100.0%), 461.2032 (29.2%), 462.2065 (4.1%), 462.2041 (1.0%)

Elemental Analysis: C, 70.42; H, 6.13; N, 6.08; O, 17.37

HRMS (ESI, m/z) calcd for  $C_{27}H_{28}N_2O_6$   $[M+Na]^+$  483.1891, found 483.1911

# 3aa

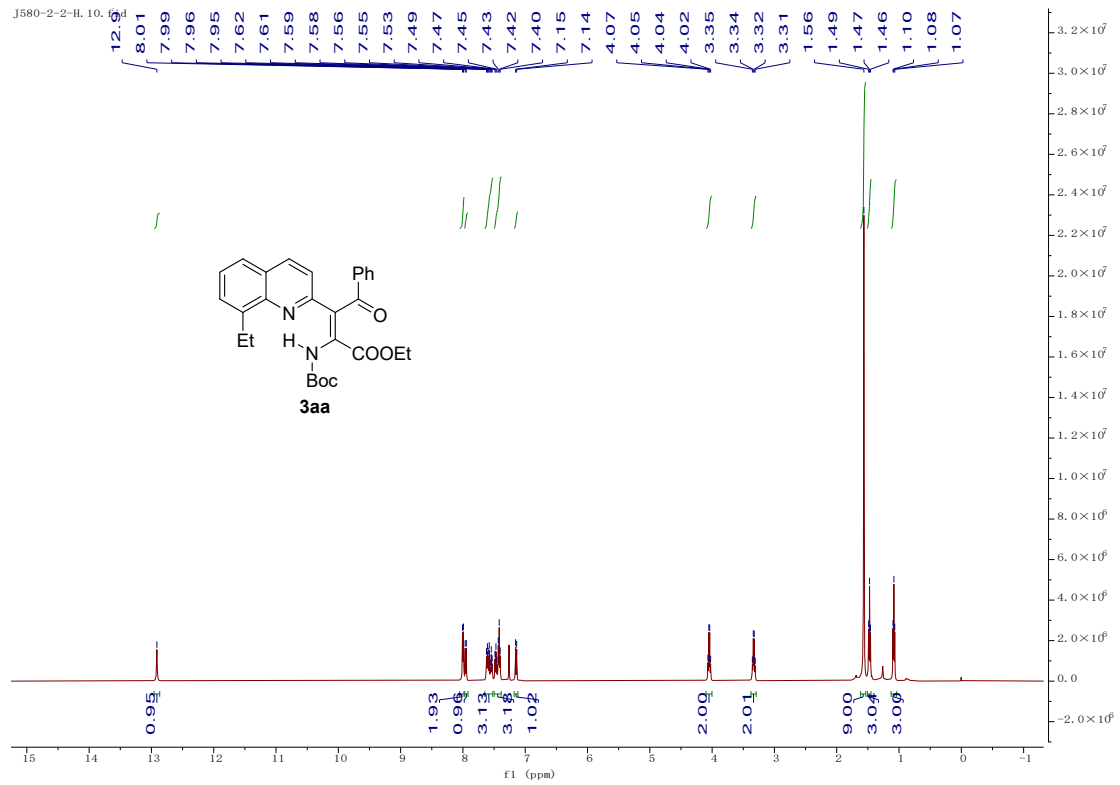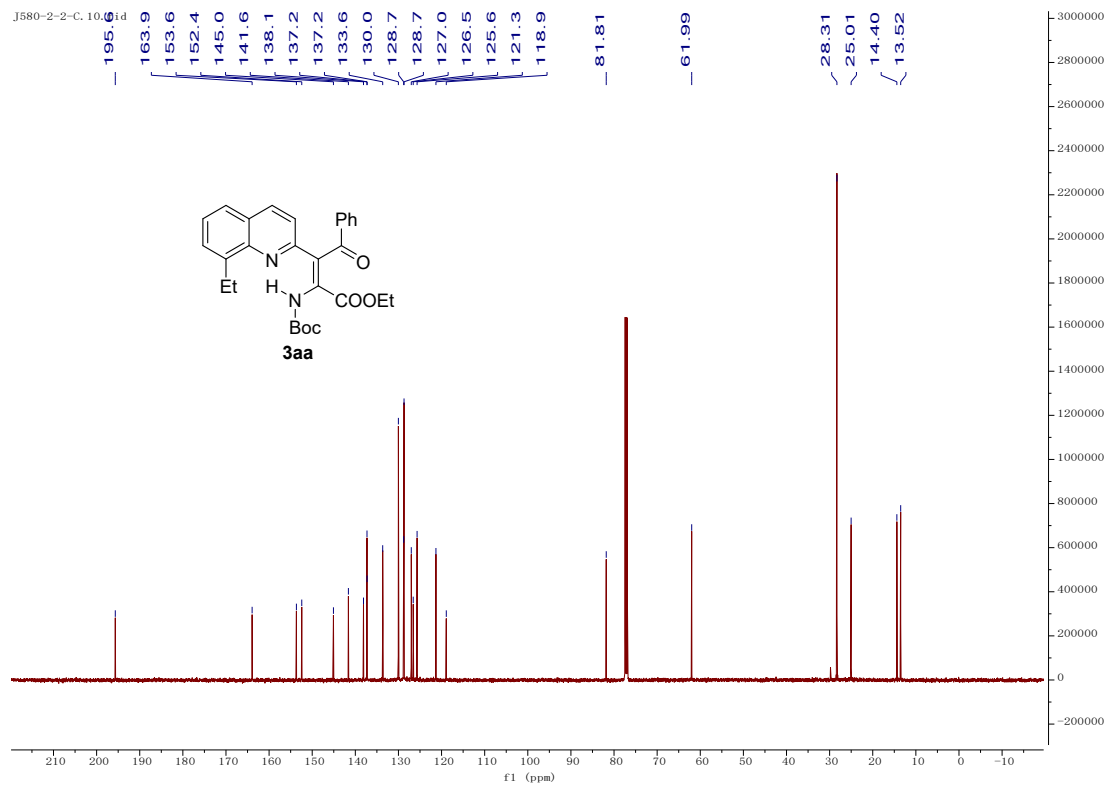

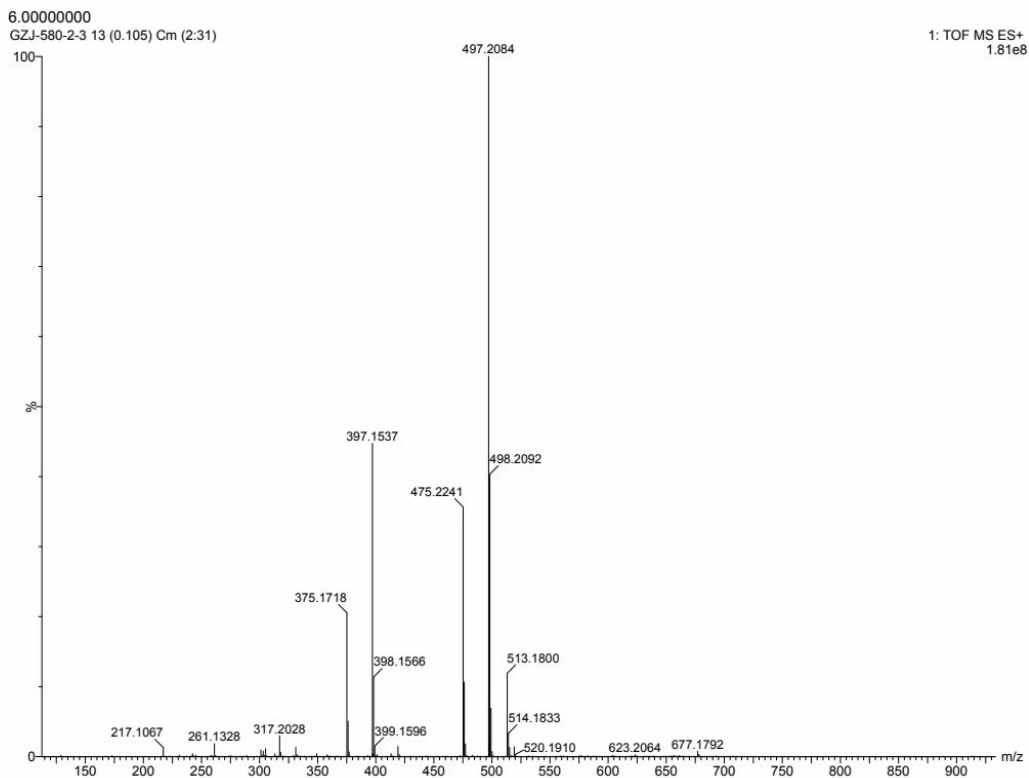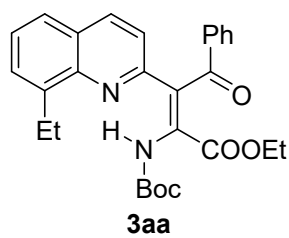

Chemical Formula:  $C_{28}H_{30}N_2O_5$

Exact Mass: 474.2155

Molecular Weight: 474.5570

m/z: 474.2155 (100.0%), 475.2188 (30.3%), 476.2222 (4.4%), 476.2197 (1.0%)

Elemental Analysis: C, 70.87; H, 6.37; N, 5.90; O, 16.86

HRMS (ESI, m/z) calcd for  $C_{28}H_{30}N_2O_5$   $[M+Na]^+$  497.2047, found 497.2084.

### 3ab

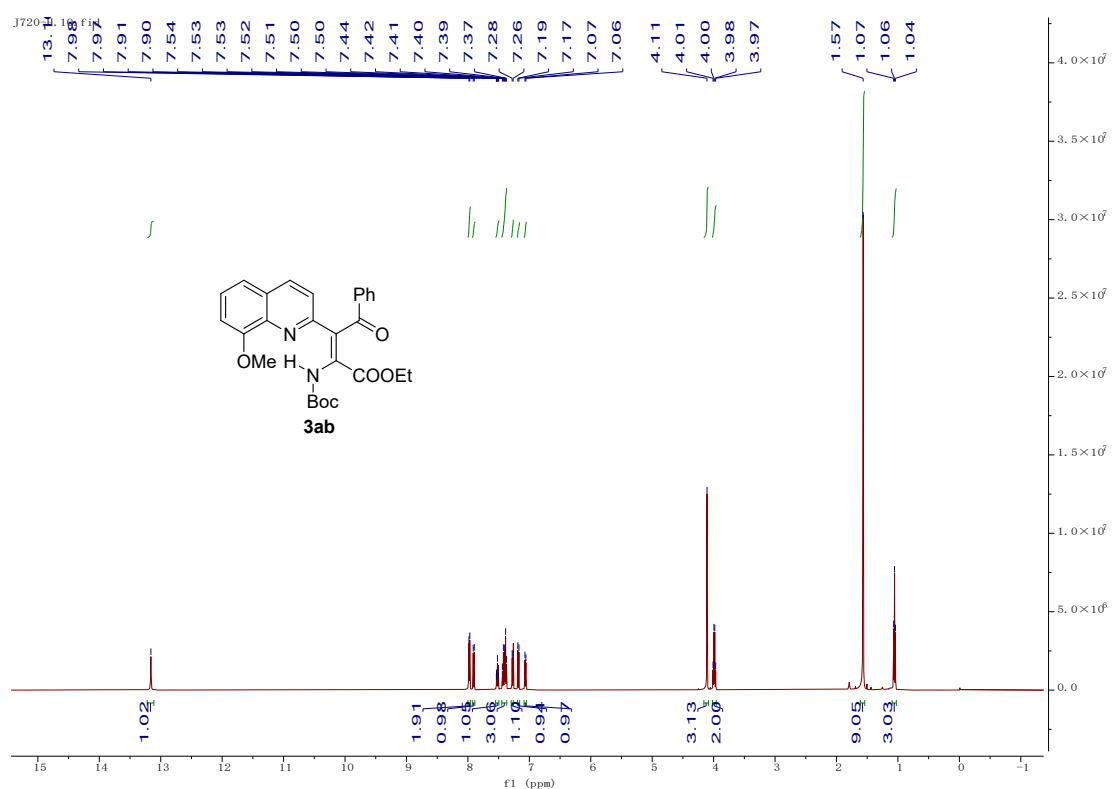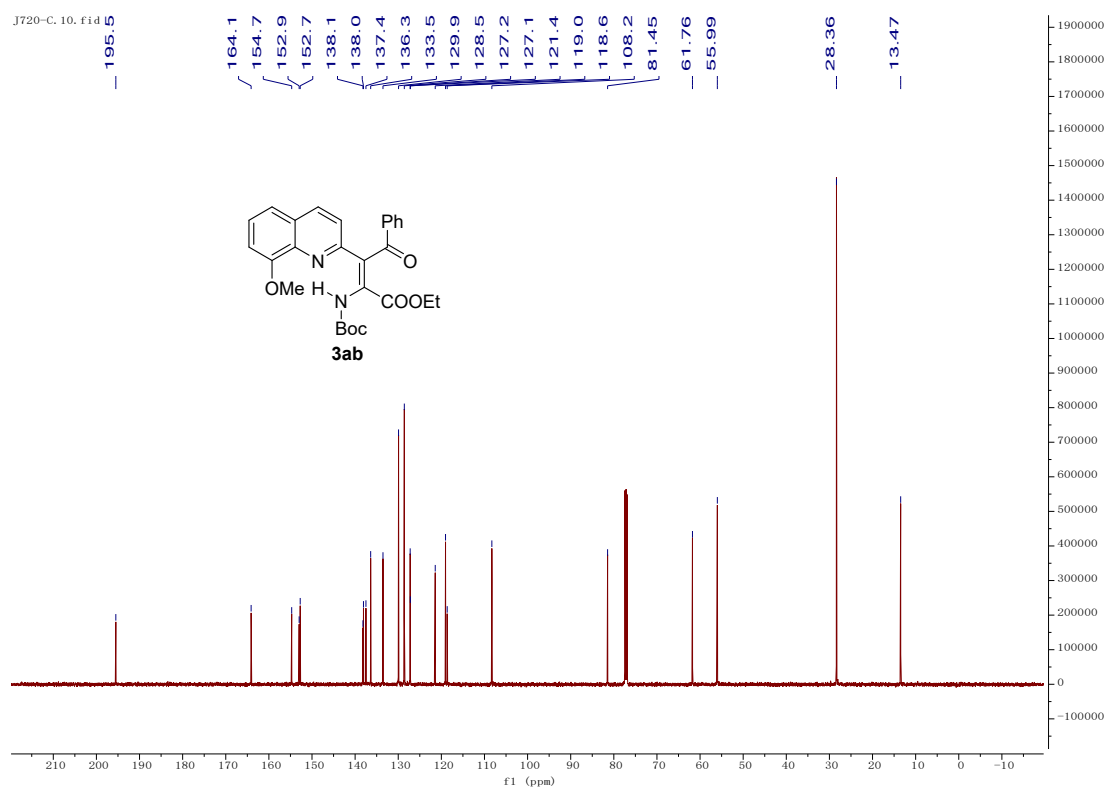

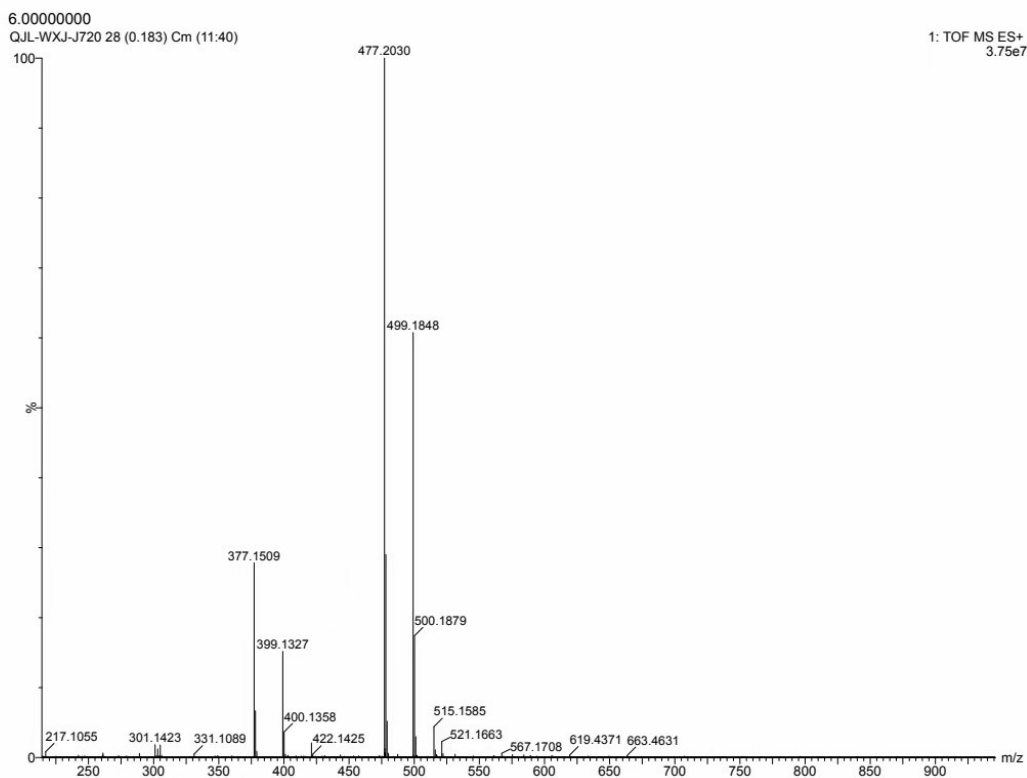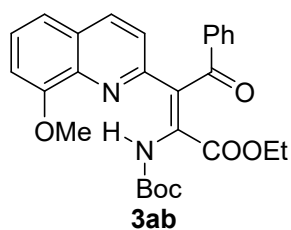

Chemical Formula:  $C_{27}H_{28}N_2O_6$

Exact Mass: 476.1947

Molecular Weight: 476.5290

m/z: 476.1947 (100.0%), 477.1981 (29.2%), 478.2014 (4.1%), 478.1990 (1.2%)

Elemental Analysis: C, 68.05; H, 5.92; N, 5.88; O, 20.14

HRMS (ESI, m/z) calcd for  $C_{27}H_{28}N_2O_6$   $[M+H]^+$  477.2021, found 477.2030.

# 3ac

J706-H\_10.fid

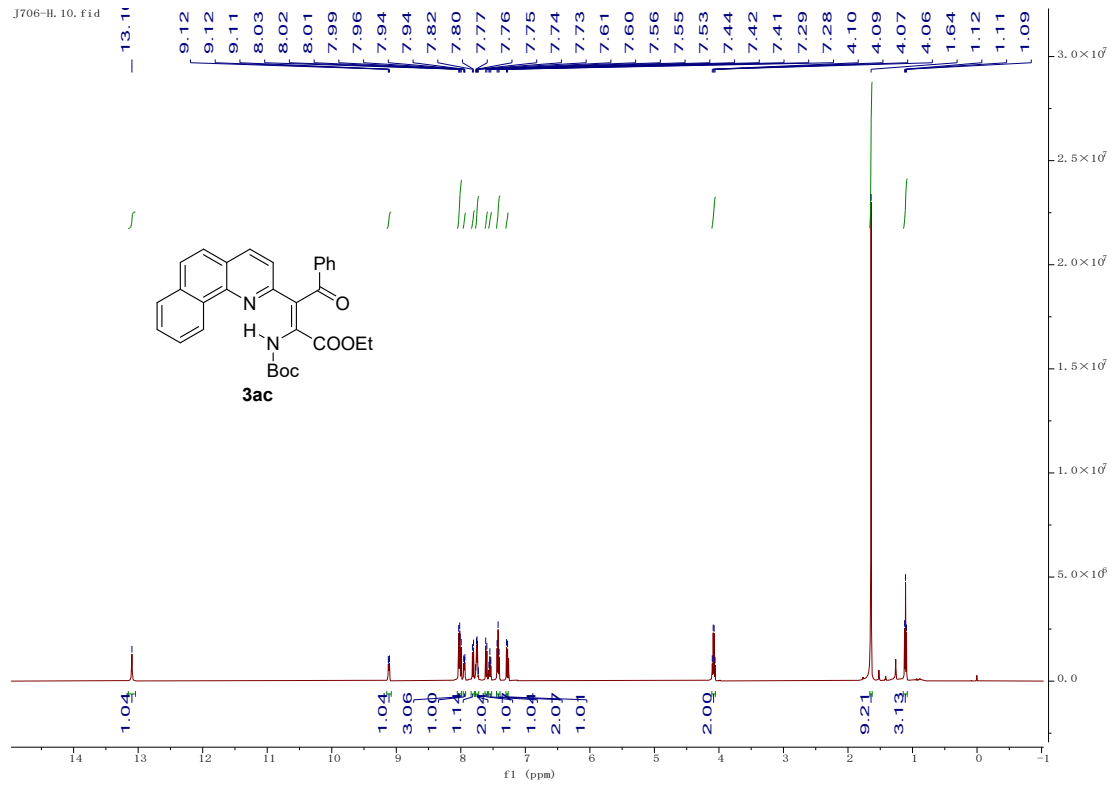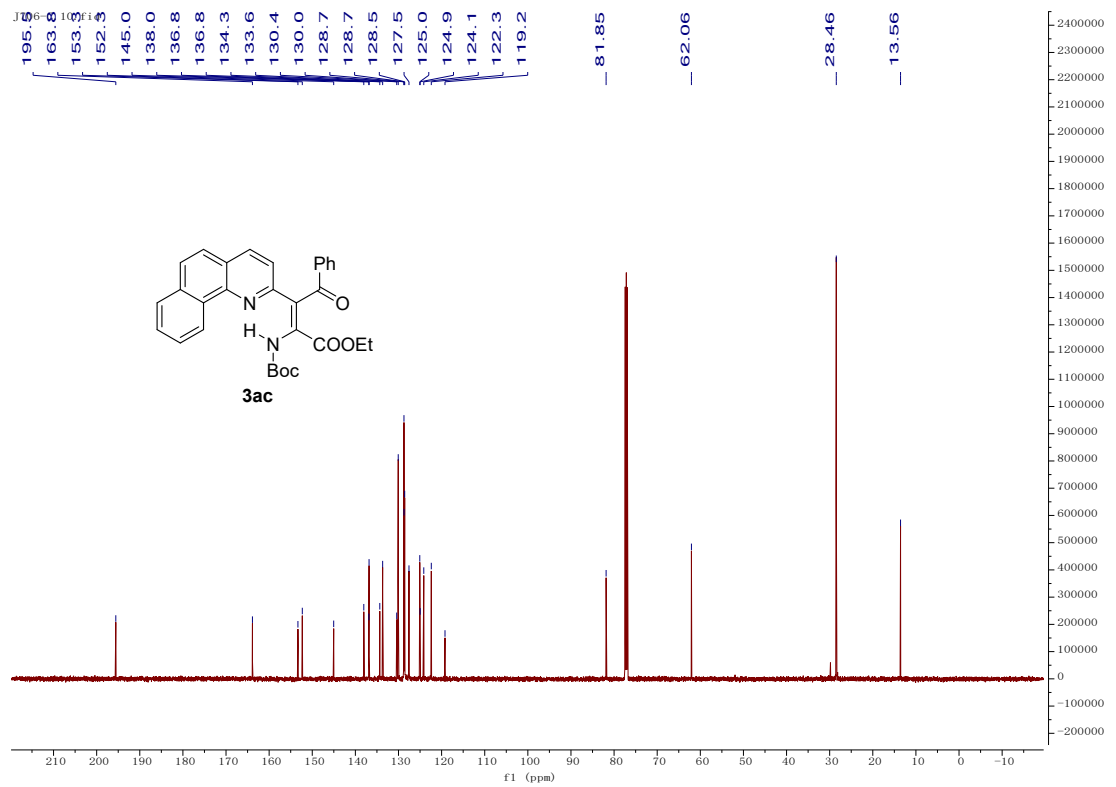

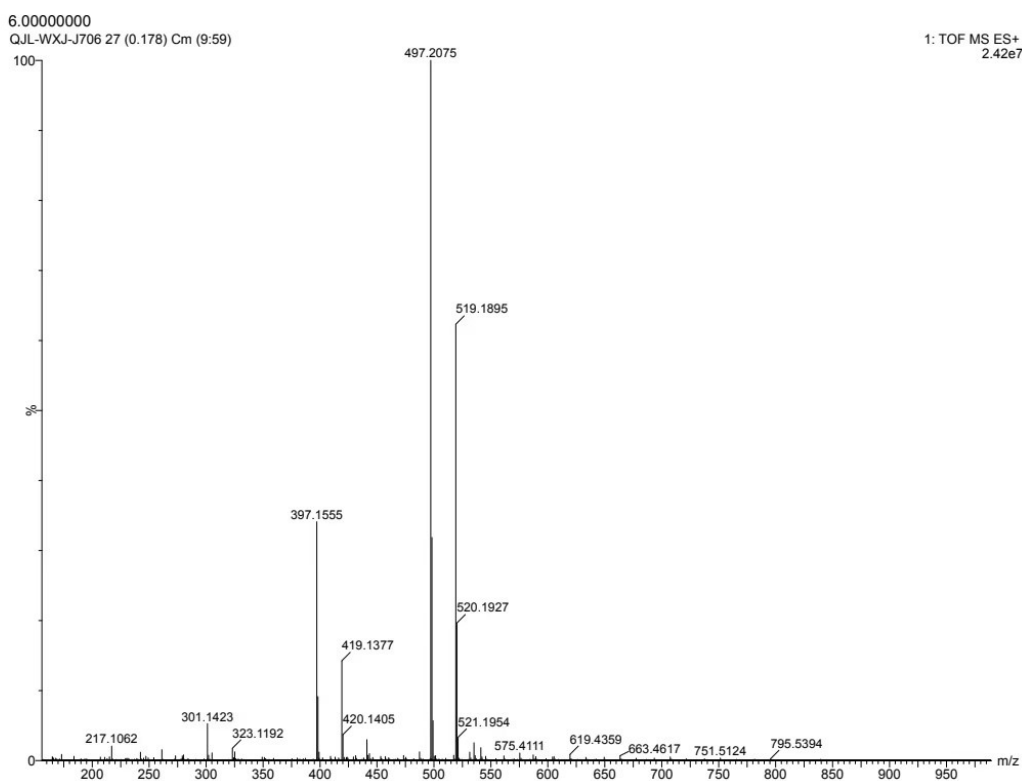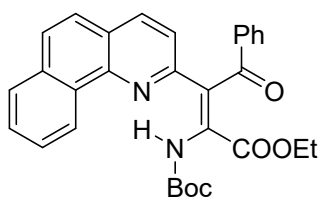

**3ac**

Chemical Formula:  $C_{30}H_{28}N_2O_5$

Exact Mass: 496.1998

Molecular Weight: 496.5630

m/z: 496.1998 (100.0%), 497.2032 (32.4%), 498.2065 (5.1%), 498.2041 (1.0%)

Elemental Analysis: C, 72.56; H, 5.68; N, 5.64; O, 16.11

HRMS (ESI, m/z) calcd for  $C_{30}H_{28}N_2O_5$   $[M+H]^+$  497.2071, found 497.2075

# 3ad'

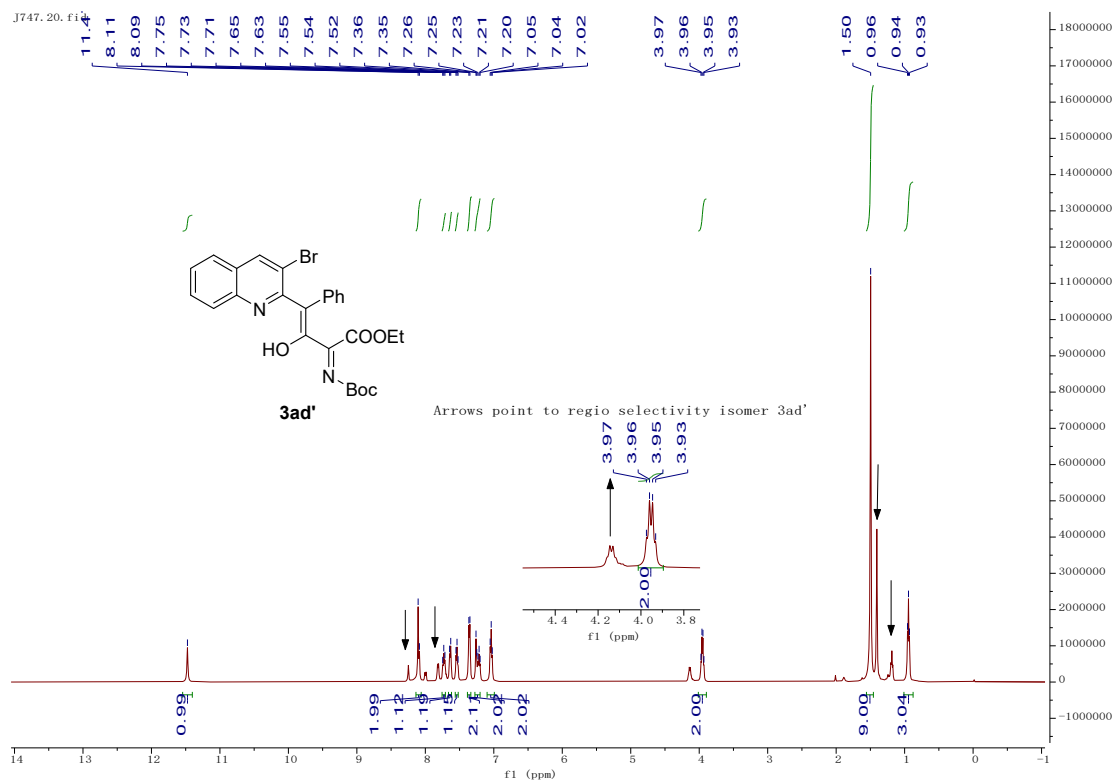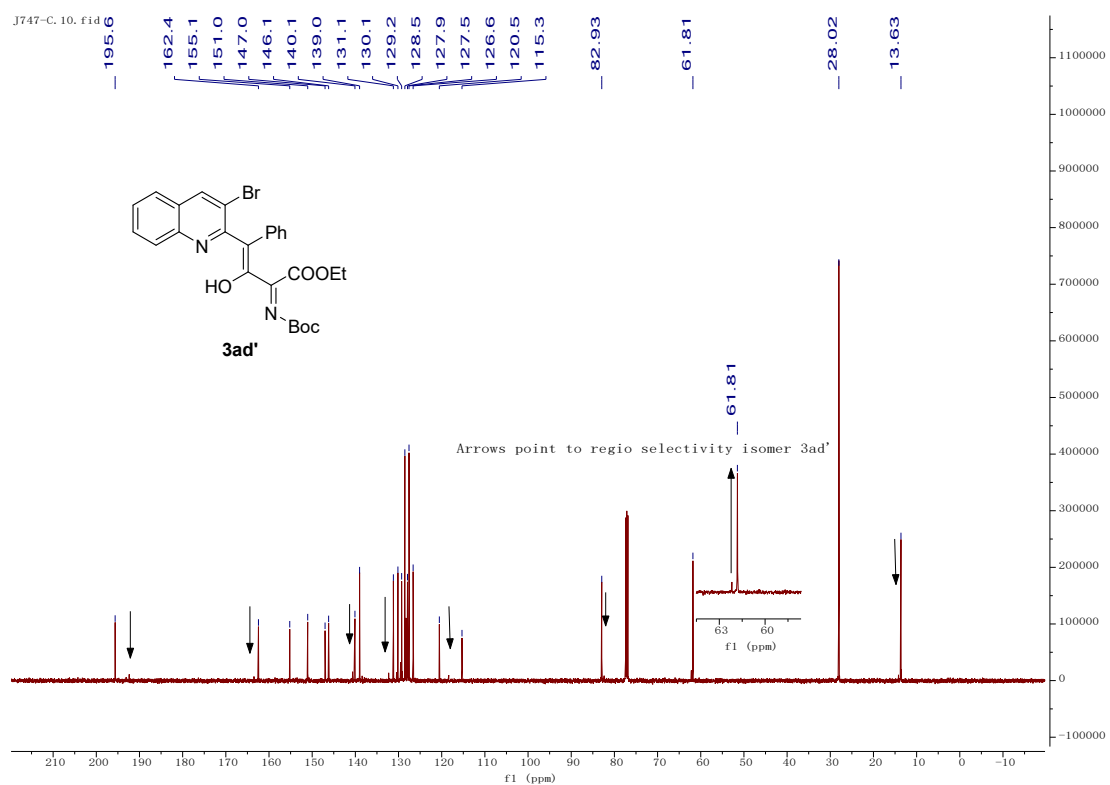

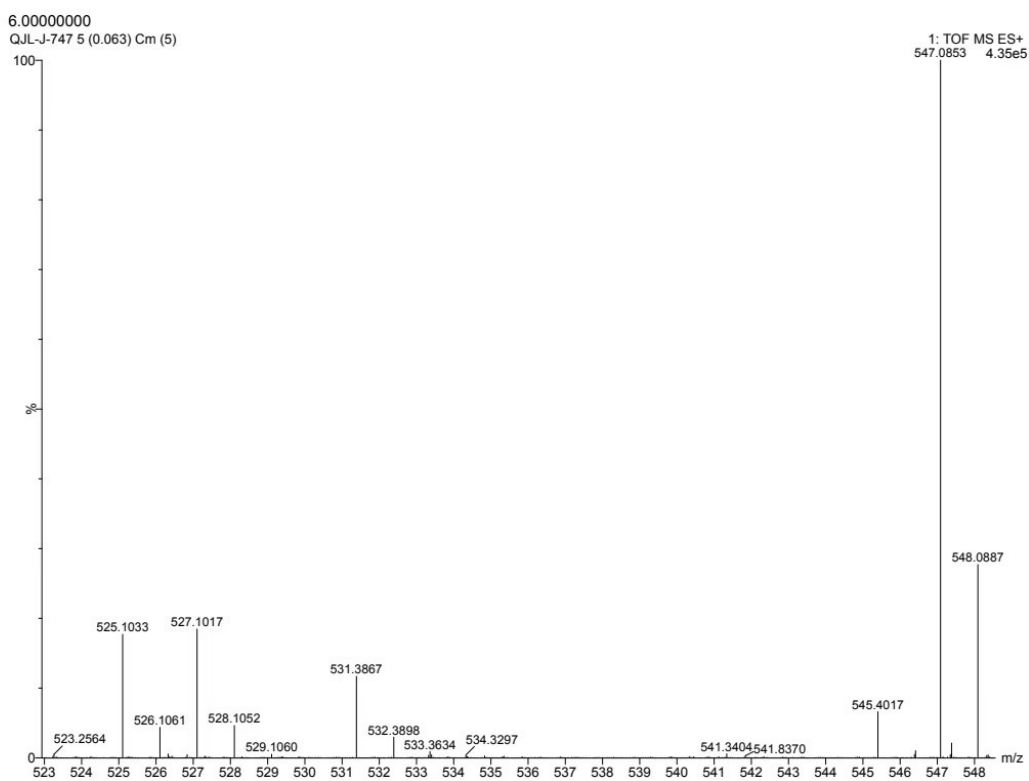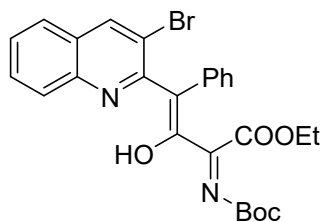

**3ad'**

Chemical Formula:  $C_{26}H_{25}BrN_2O_5$

Exact Mass: 524.0947

Molecular Weight: 525.3990

m/z: 524.0947 (100.0%), 526.0926 (97.3%), 525.0980 (28.1%), 527.0960 (27.4%), 526.1014 (3.8%), 528.0993 (3.7%), 526.0989 (1.0%), 528.0969 (1.0%)

Elemental Analysis: C, 59.44; H, 4.80; Br, 15.21; N, 5.33; O, 15.23

HRMS (ESI, m/z) calcd for  $C_{26}H_{25}BrN_2O_5$   $[M+Na]^+$  547.0840, found 547.0853.

### 3ae'

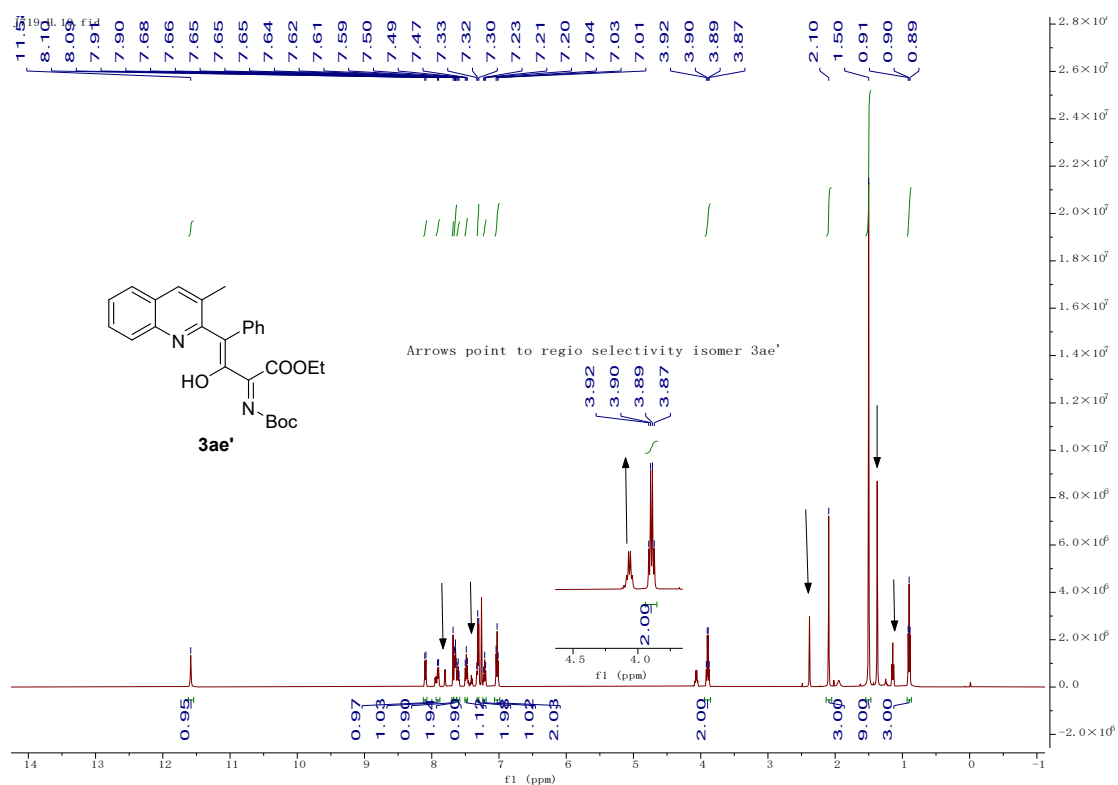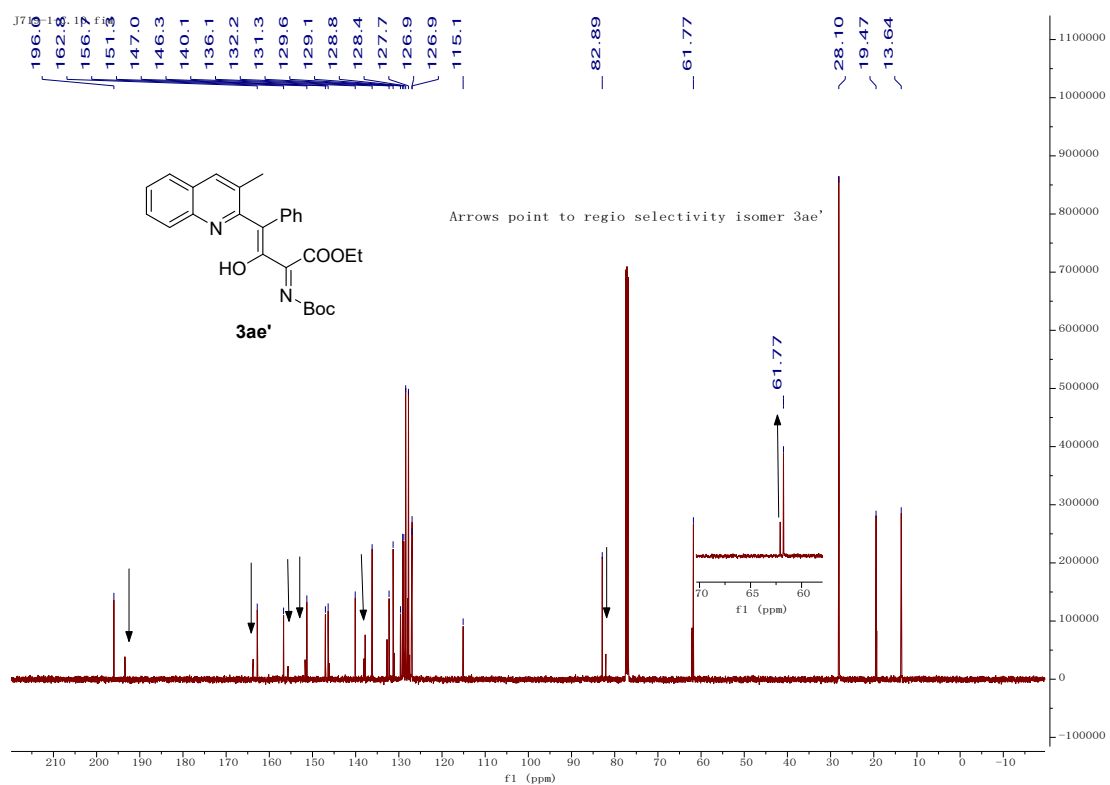

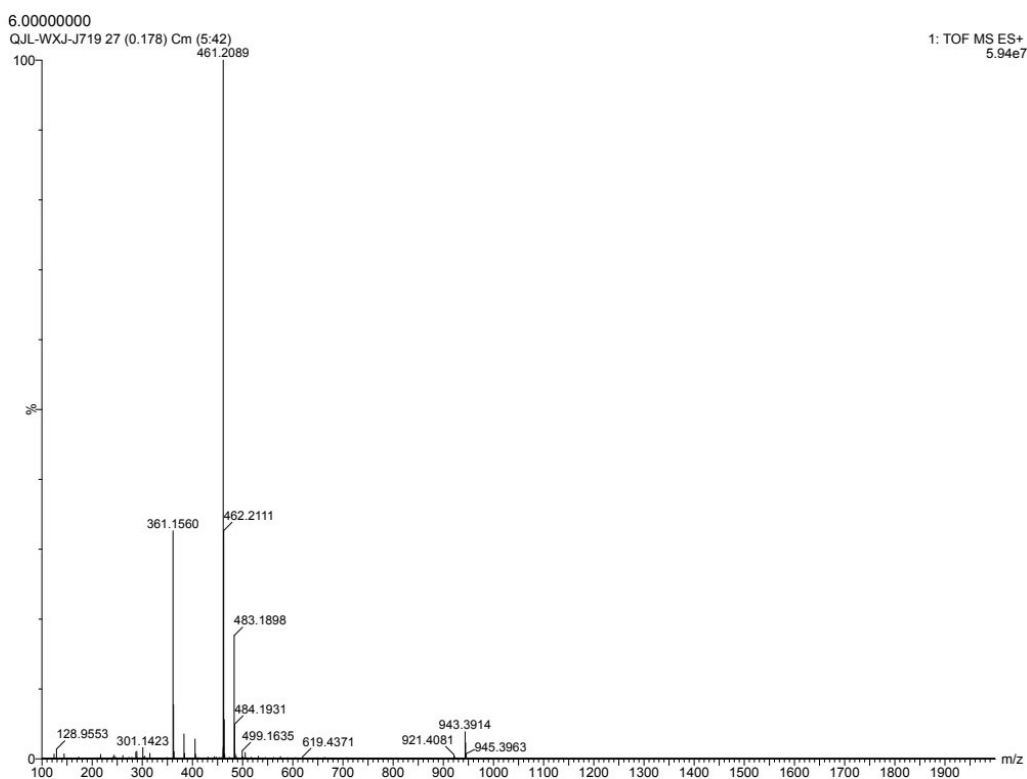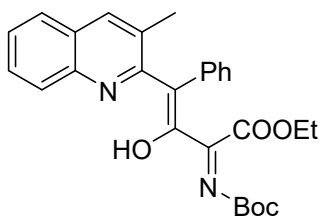

**3ae'**

Chemical Formula:  $C_{27}H_{28}N_2O_5$

Exact Mass: 460.1998

Molecular Weight: 460.5300

m/z: 460.1998 (100.0%), 461.2032 (29.2%), 462.2065 (4.1%), 462.2041 (1.0%)

Elemental Analysis: C, 70.42; H, 6.13; N, 6.08; O, 17.37

HRMS (ESI, m/z) calcd for  $C_{27}H_{28}N_2O_5$   $[M+H]^+$  461.2071, found 461.2089.

### 3af

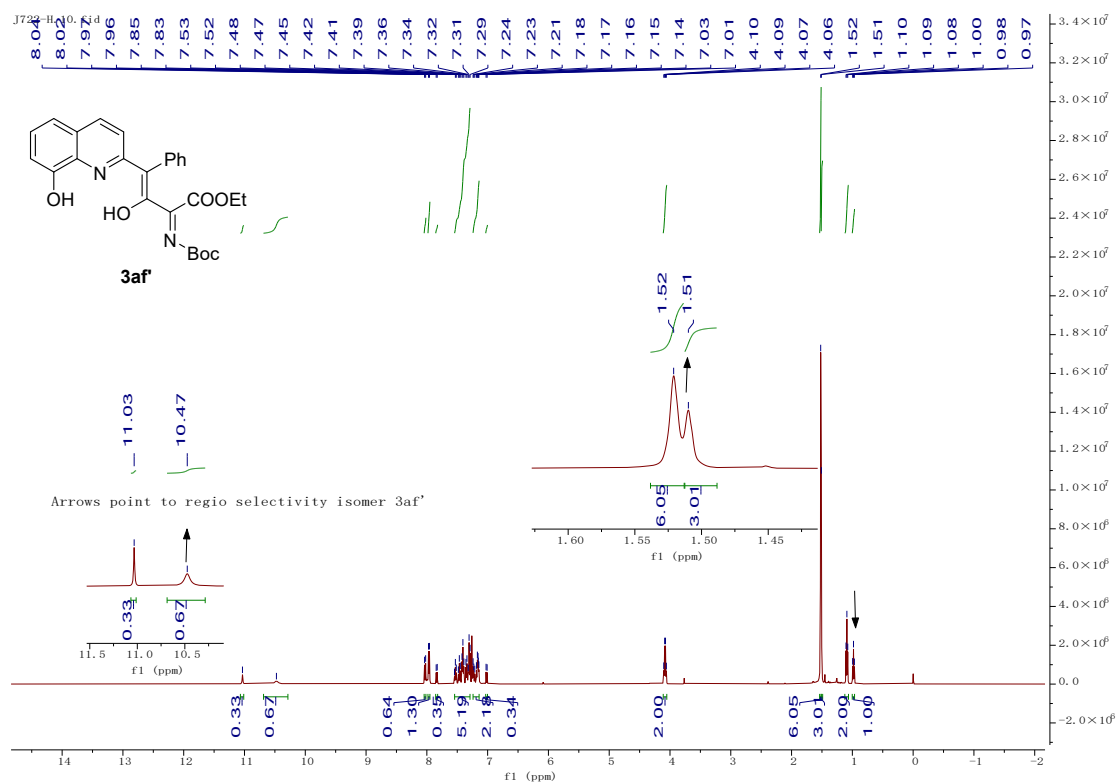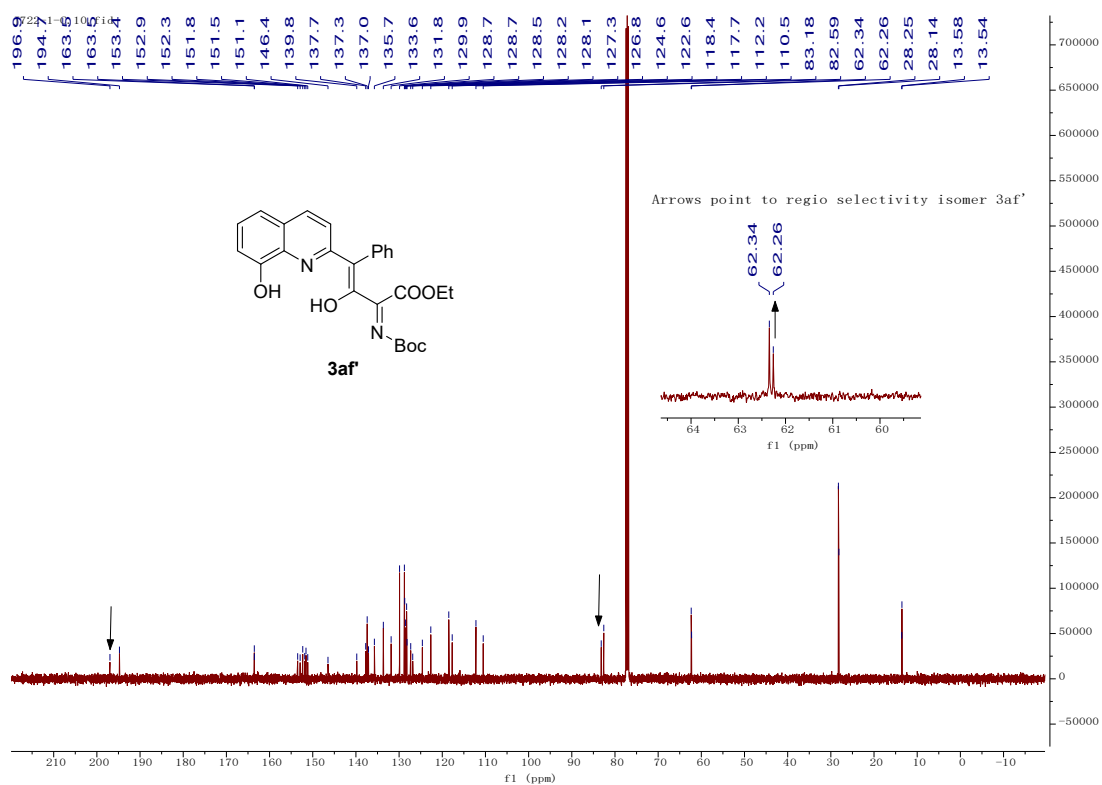

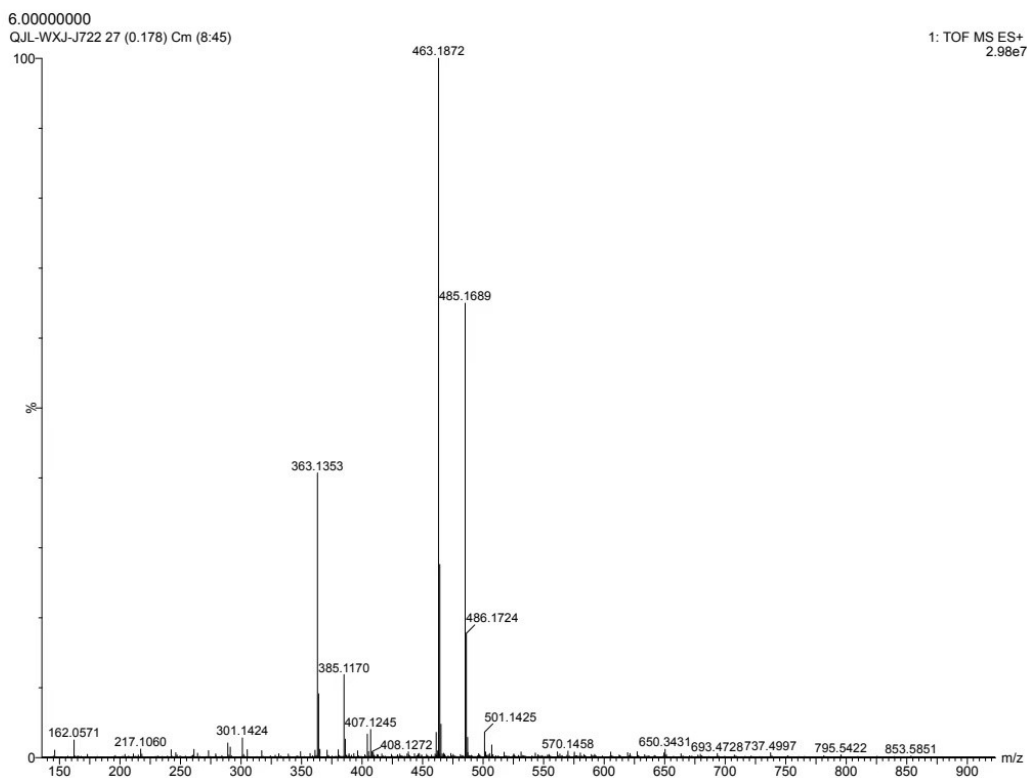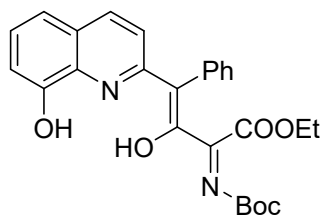

**3af'**

Chemical Formula:  $C_{26}H_{26}N_2O_6$

Exact Mass: 462.1791

Molecular Weight: 462.5020

m/z: 462.1791 (100.0%), 463.1824 (28.1%), 464.1858 (3.8%), 464.1833 (1.2%)

Elemental Analysis: C, 67.52; H, 5.67; N, 6.06; O, 20.76

HRMS (ESI, m/z) calcd for  $C_{26}H_{26}N_2O_6$   $[M+H]^+$  463.1864, found 463.1872.

**3ag**

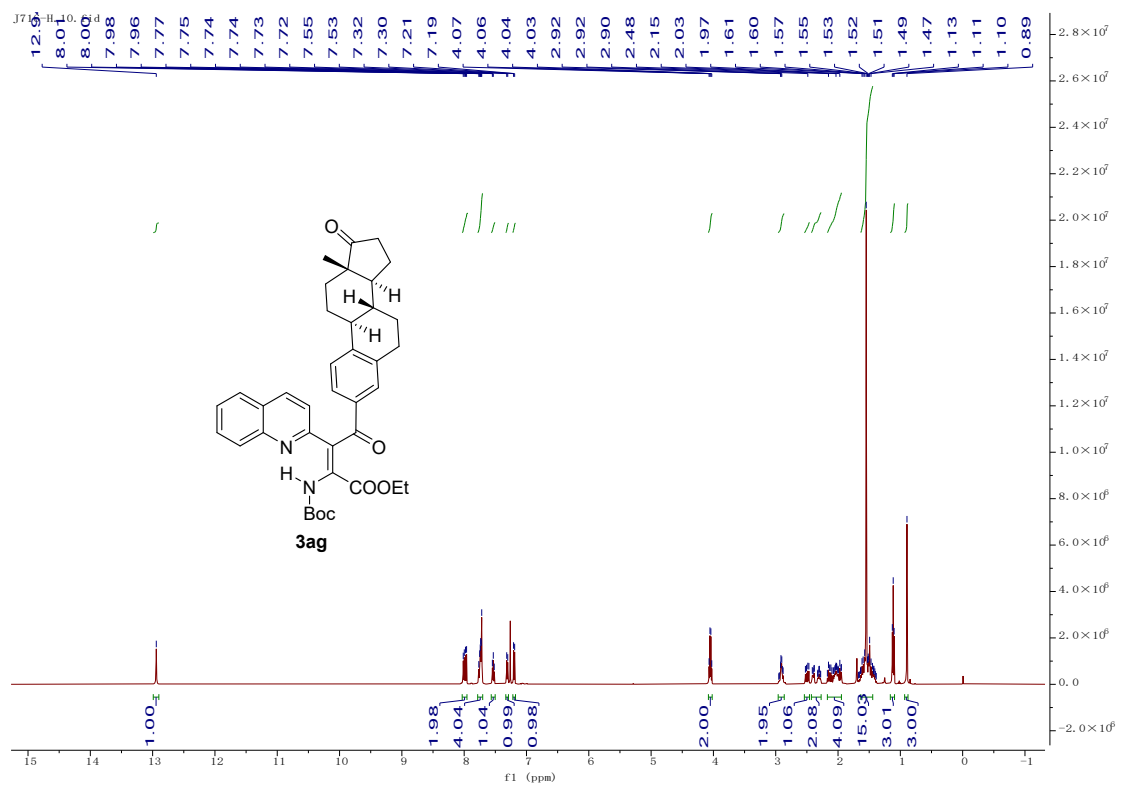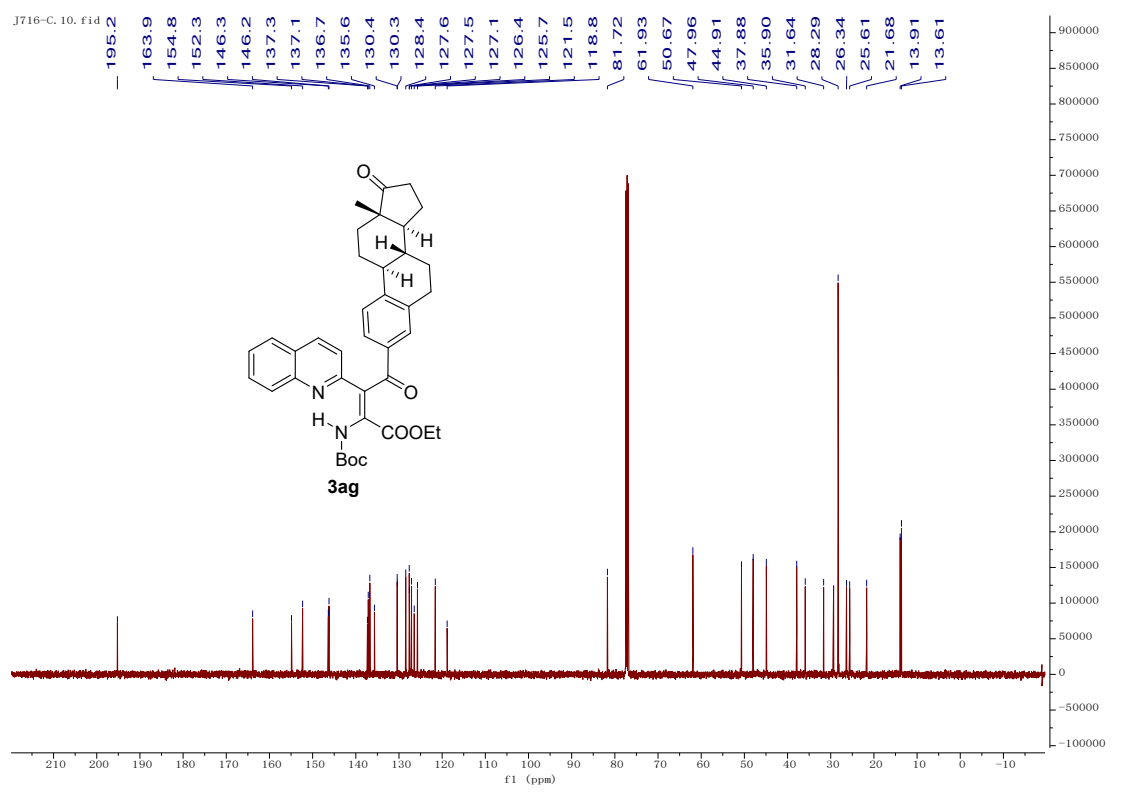

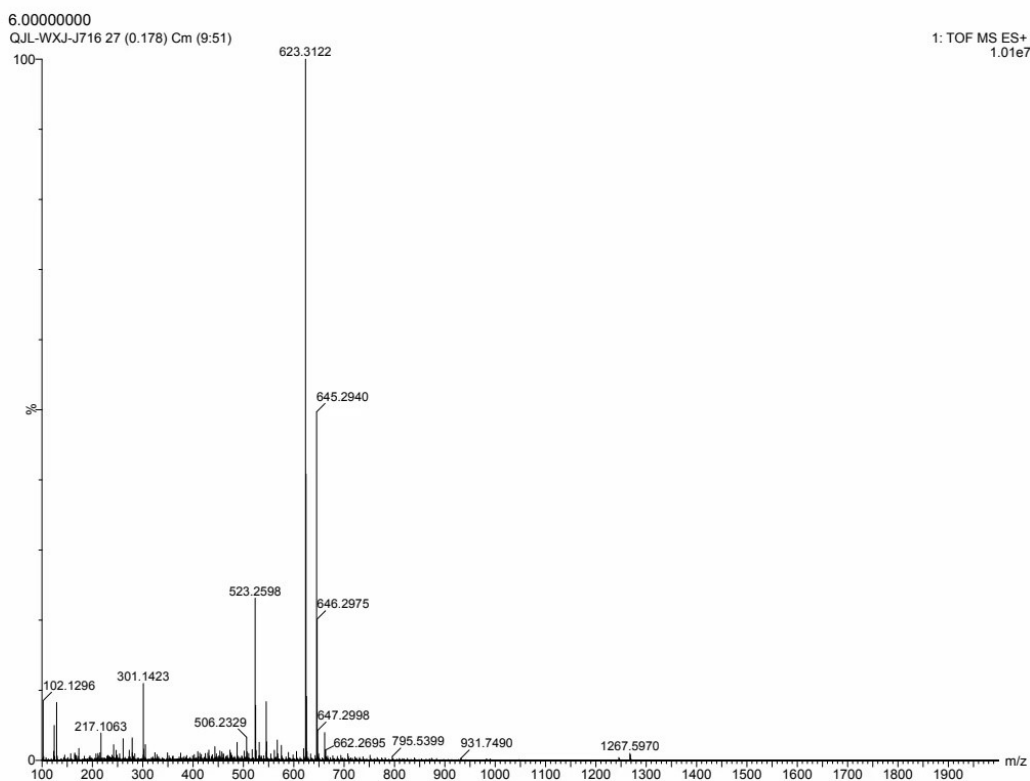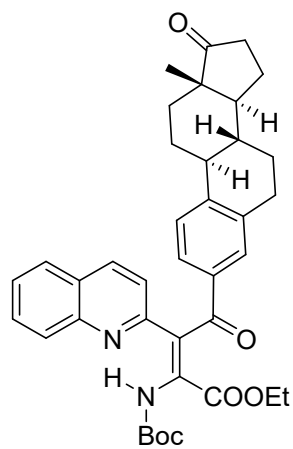

**3ag**

Chemical Formula:  $C_{38}H_{42}N_2O_6$

Exact Mass: 622.3043

Molecular Weight: 622.7620

m/z: 622.3043 (100.0%), 623.3076 (41.1%), 624.3110 (8.2%), 624.3085 (1.2%), 625.3144 (1.1%)

Elemental Analysis: C, 73.29; H, 6.80; N, 4.50; O, 15.41

HRMS (ESI, m/z) calcd for  $C_{38}H_{42}N_2O_6$  [M+H]<sup>+</sup> 623.3116, found 623.3122.

# 3ah

J717-H, 10, f1.d

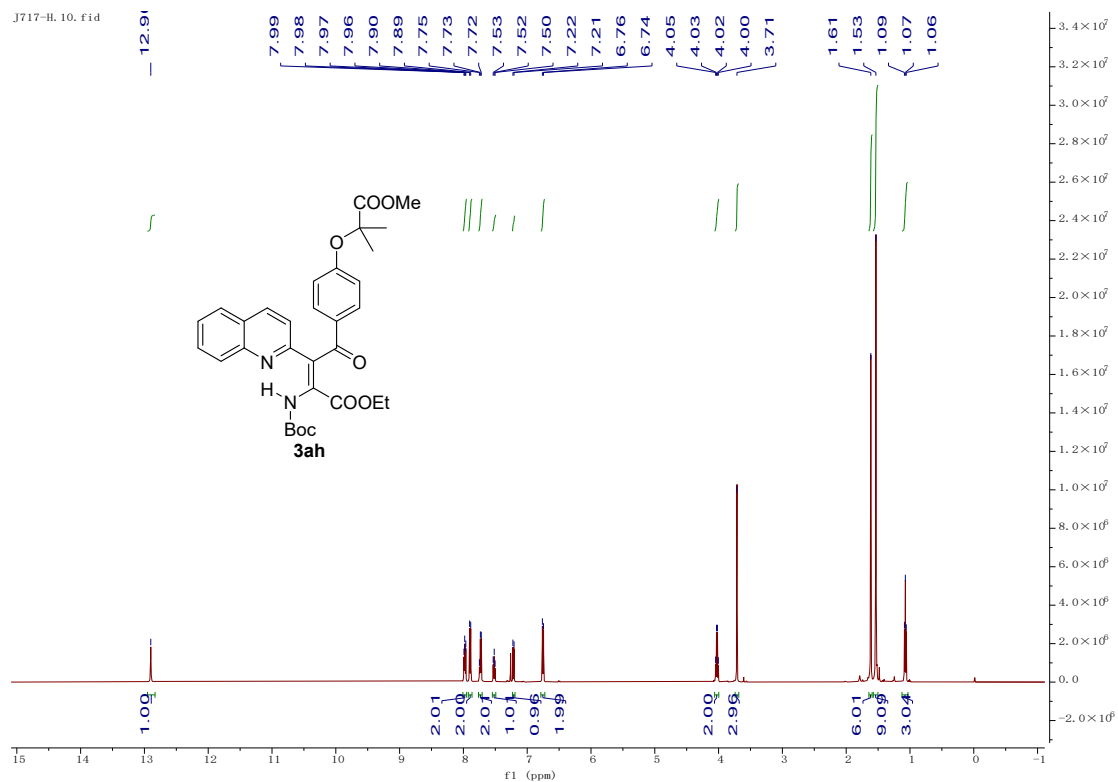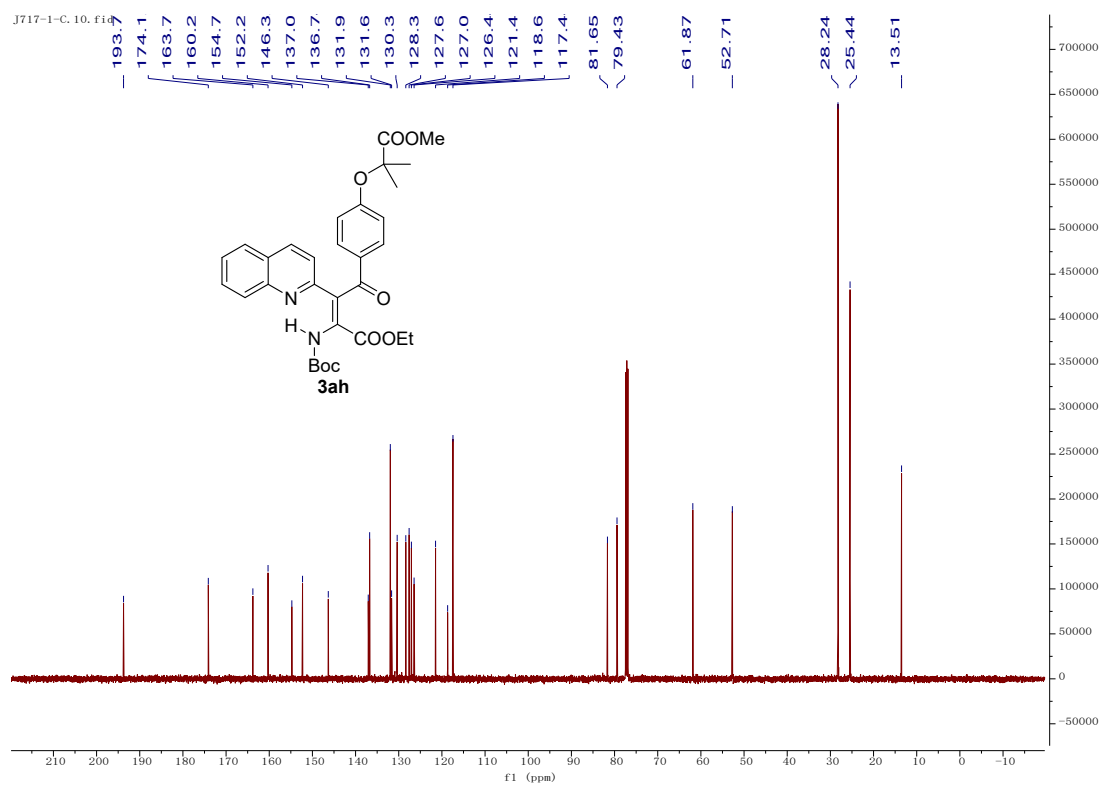

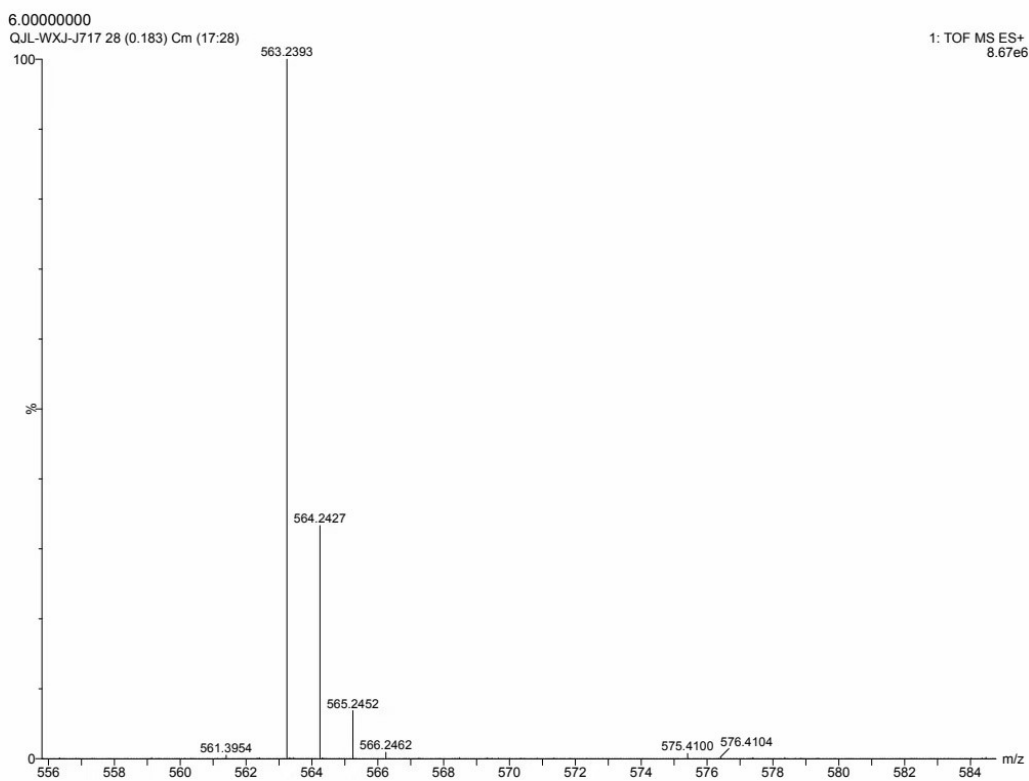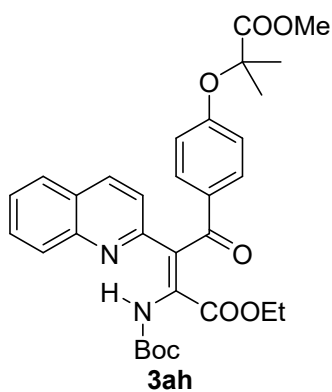

Chemical Formula:  $C_{31}H_{34}N_2O_8$

Exact Mass: 562.2315

Molecular Weight: 562.6190

m/z: 562.2315 (100.0%), 563.2349 (33.5%), 564.2382 (5.4%), 564.2358 (1.6%)

Elemental Analysis: C, 66.18; H, 6.09; N, 4.98; O, 22.75

HRMS (ESI, m/z) calcd for  $C_{31}H_{34}N_2O_8$   $[M+H]^+$  563.2338, found 563.2393.

# 3ai

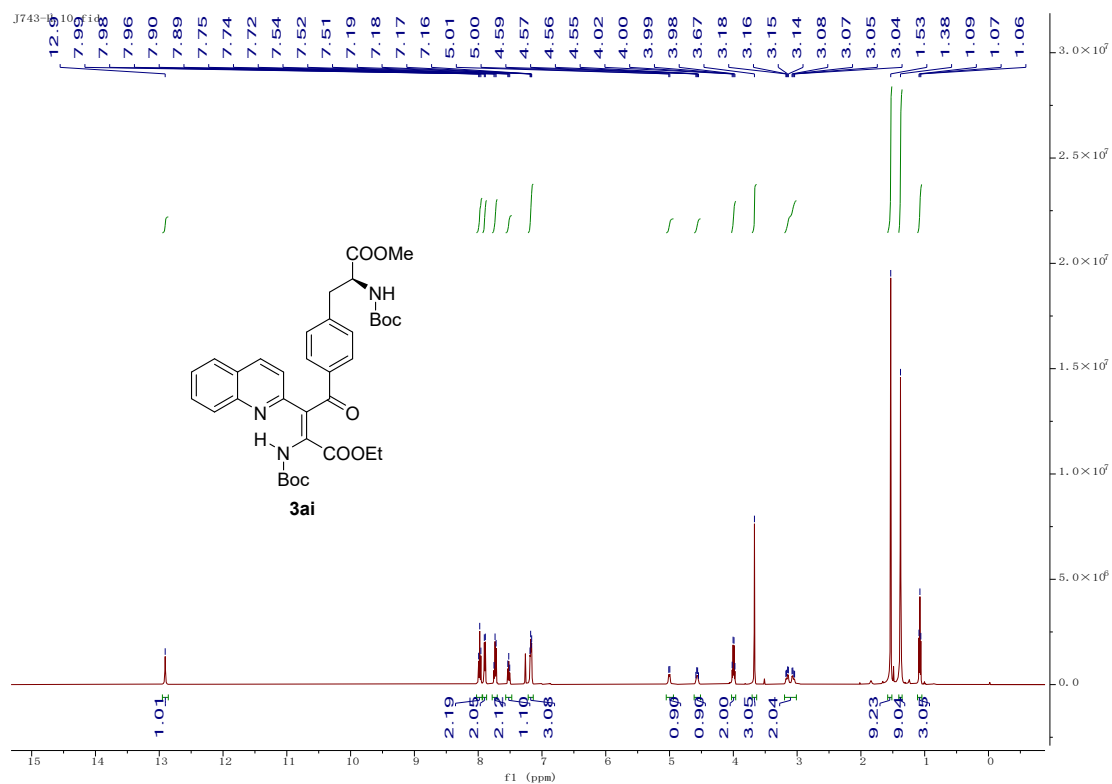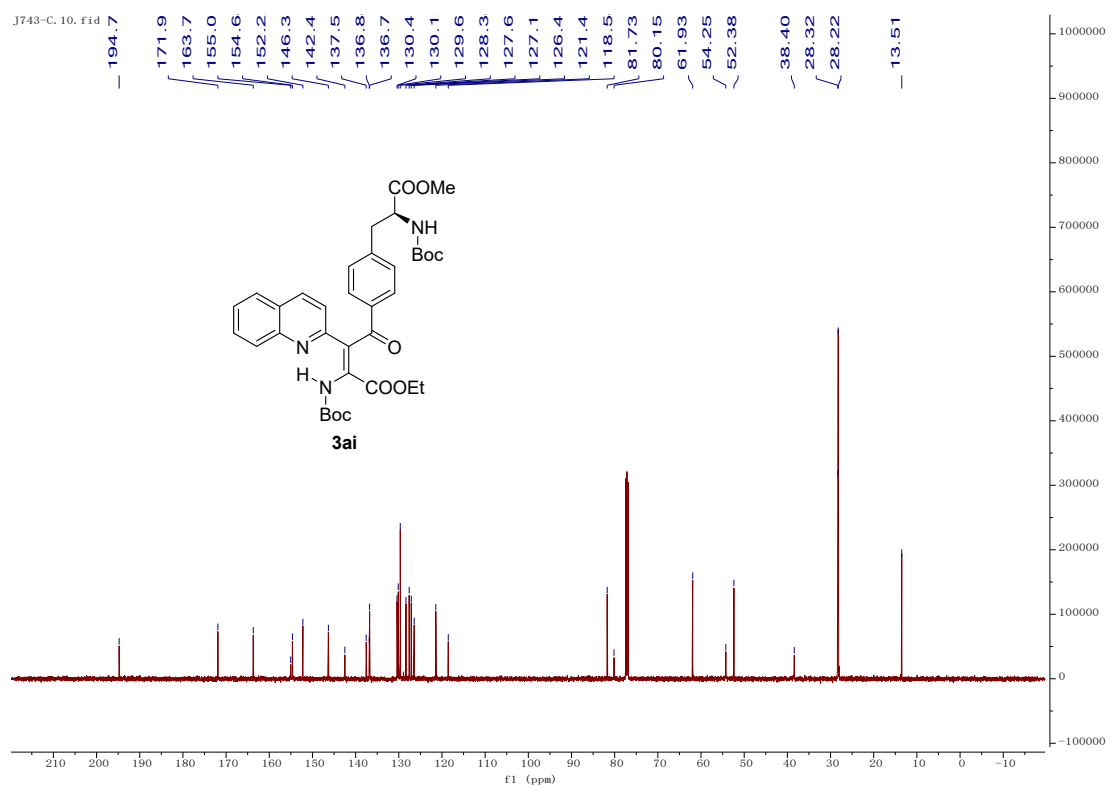

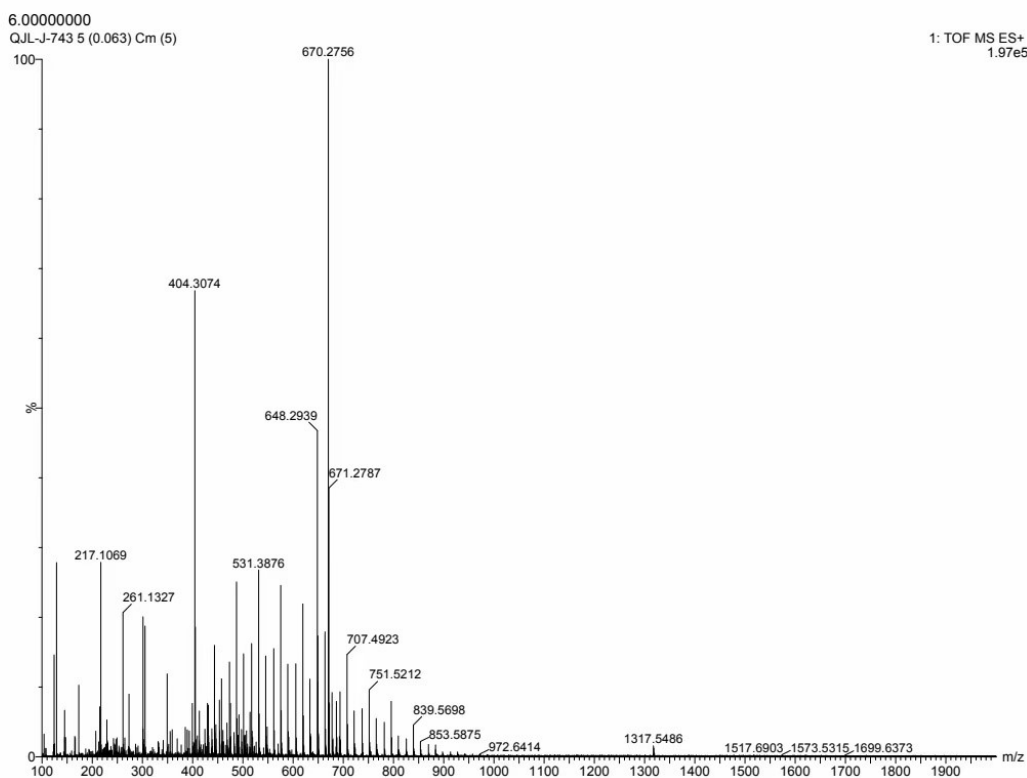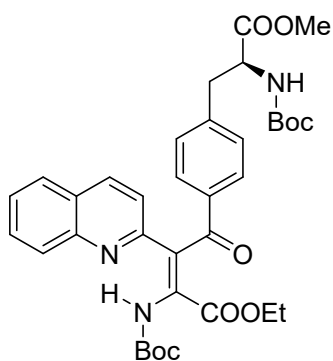

**3ai**

Chemical Formula:  $C_{35}H_{41}N_3O_9$

Exact Mass: 647.2843

Molecular Weight: 647.7250

m/z: 647.2843 (100.0%), 648.2876 (37.9%), 649.2910 (7.0%), 649.2885 (1.8%), 648.2813 (1.1%)

Elemental Analysis: C, 64.90; H, 6.38; N, 6.49; O, 22.23

HRMS (ESI, m/z) calcd for  $C_{35}H_{41}N_3O_9$   $[M+Na]^+$  670.2735, found 670.2756.

**3aj**

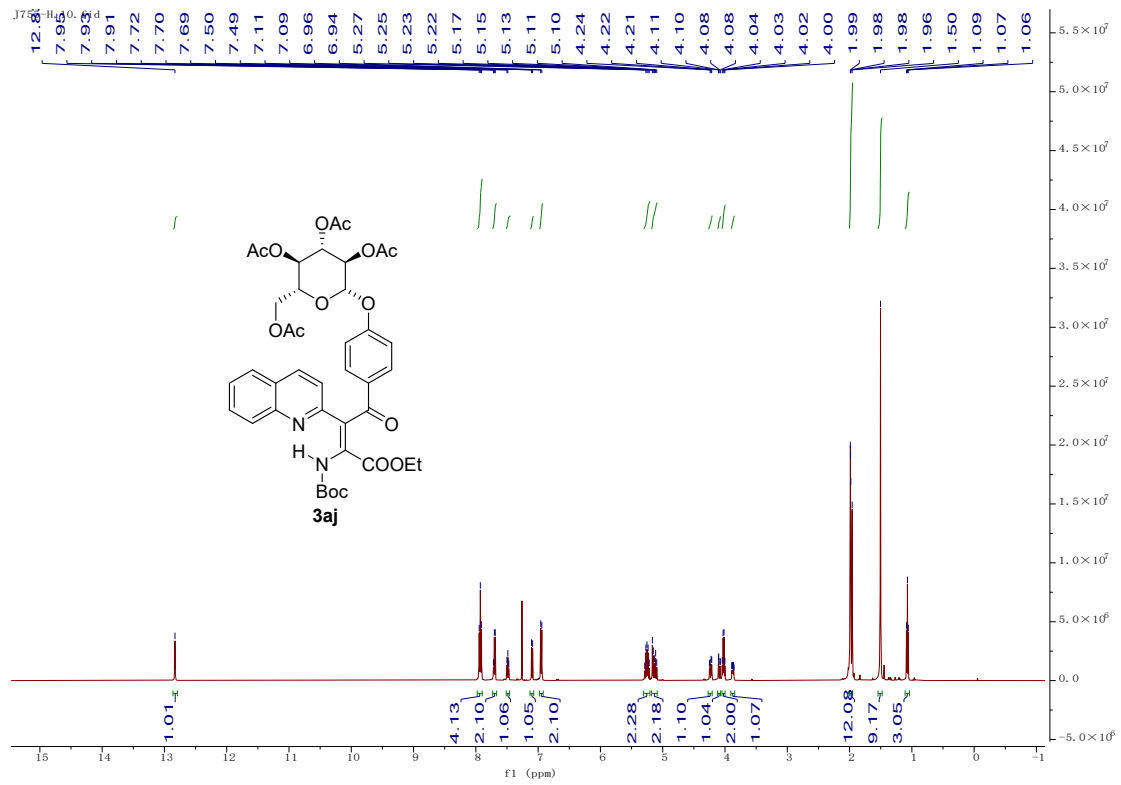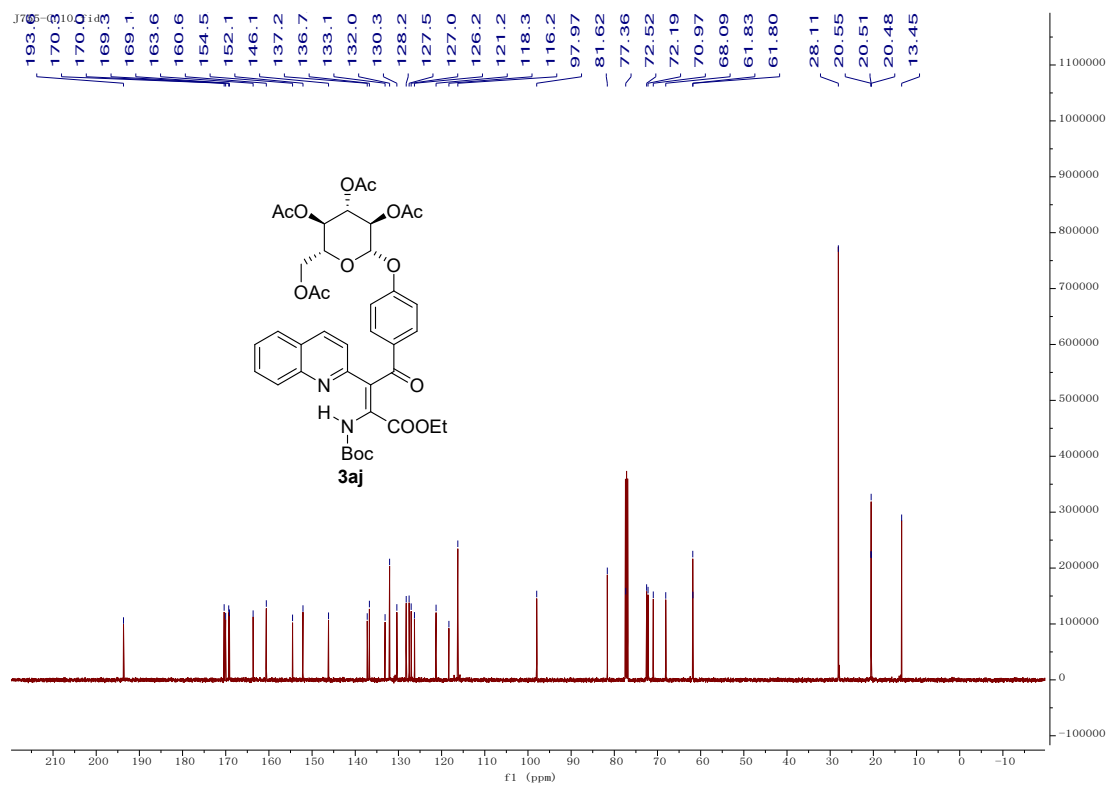

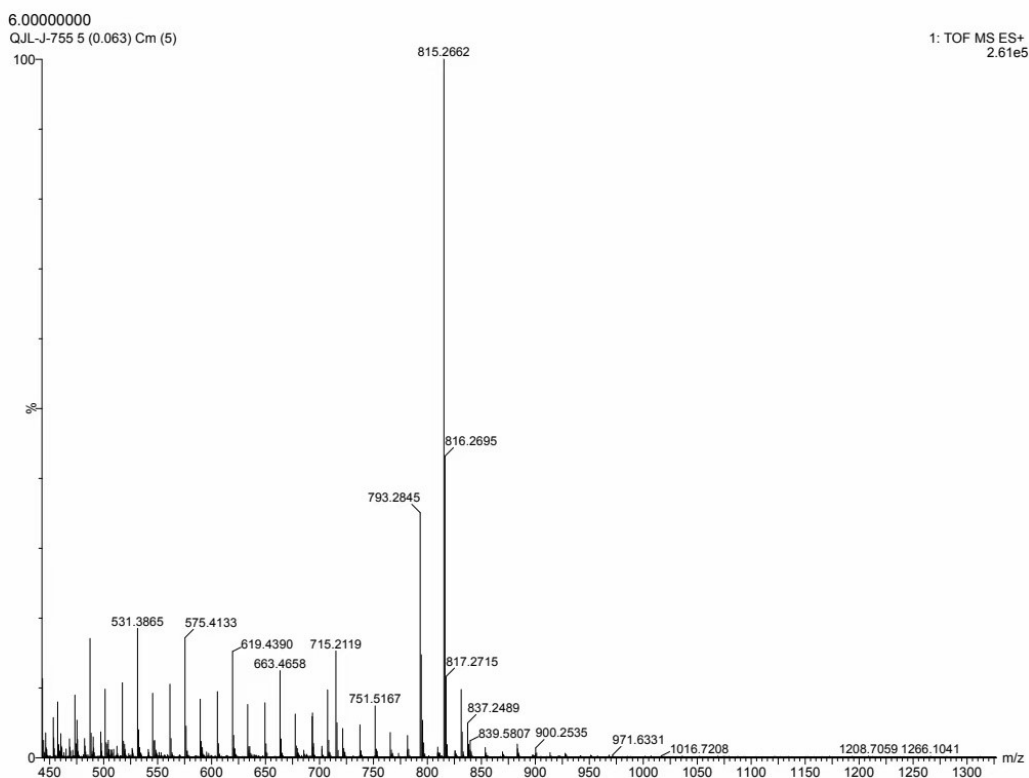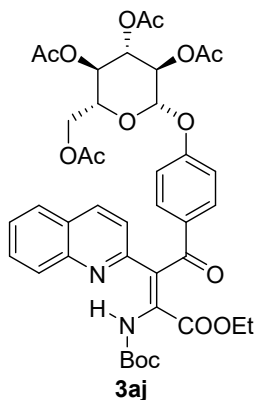

Chemical Formula:  $C_{40}H_{44}N_2O_{15}$

Exact Mass: 792.2742

Molecular Weight: 792.7910

m/z: 792.2742 (100.0%), 793.2775 (43.3%), 794.2809 (9.1%), 794.2784 (3.1%), 795.2818 (1.3%), 795.2842 (1.3%)

Elemental Analysis: C, 60.60; H, 5.59; N, 3.53; O, 30.27

HRMS (ESI, m/z) calcd for  $C_{40}H_{44}N_2O_{15}$   $[M+Na]^+$  815.2634, found 815.2662.

**3ak**

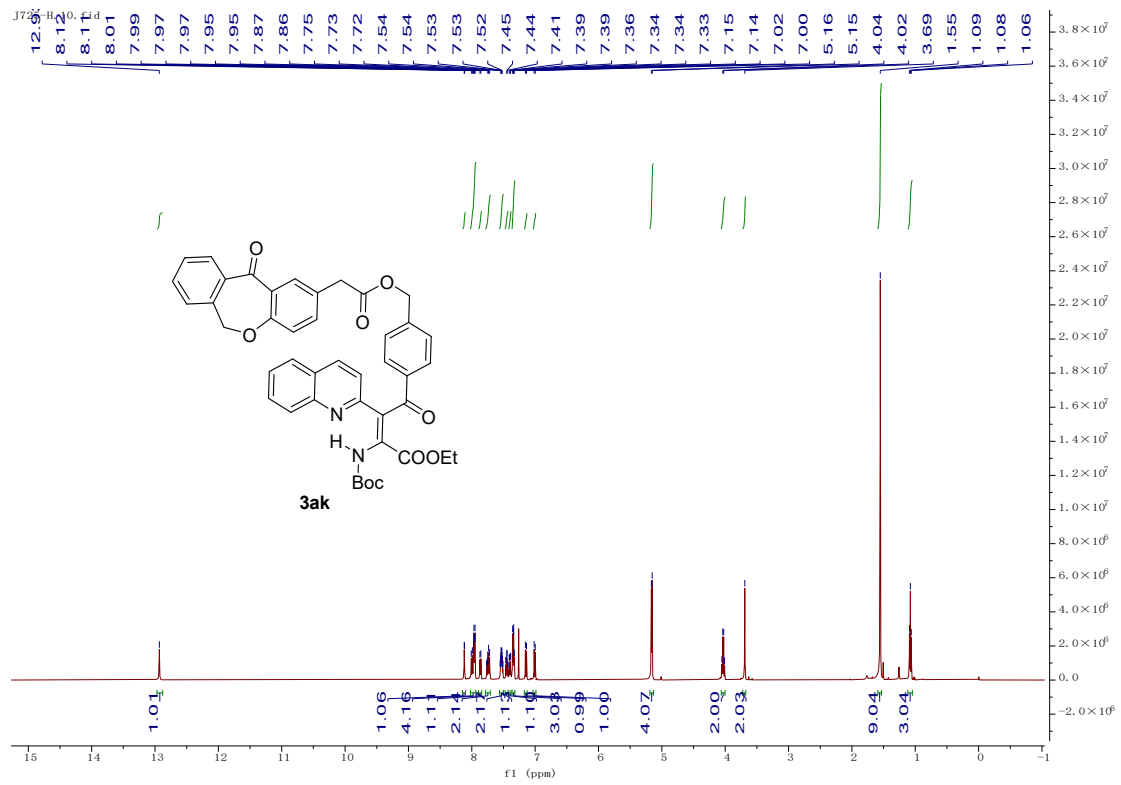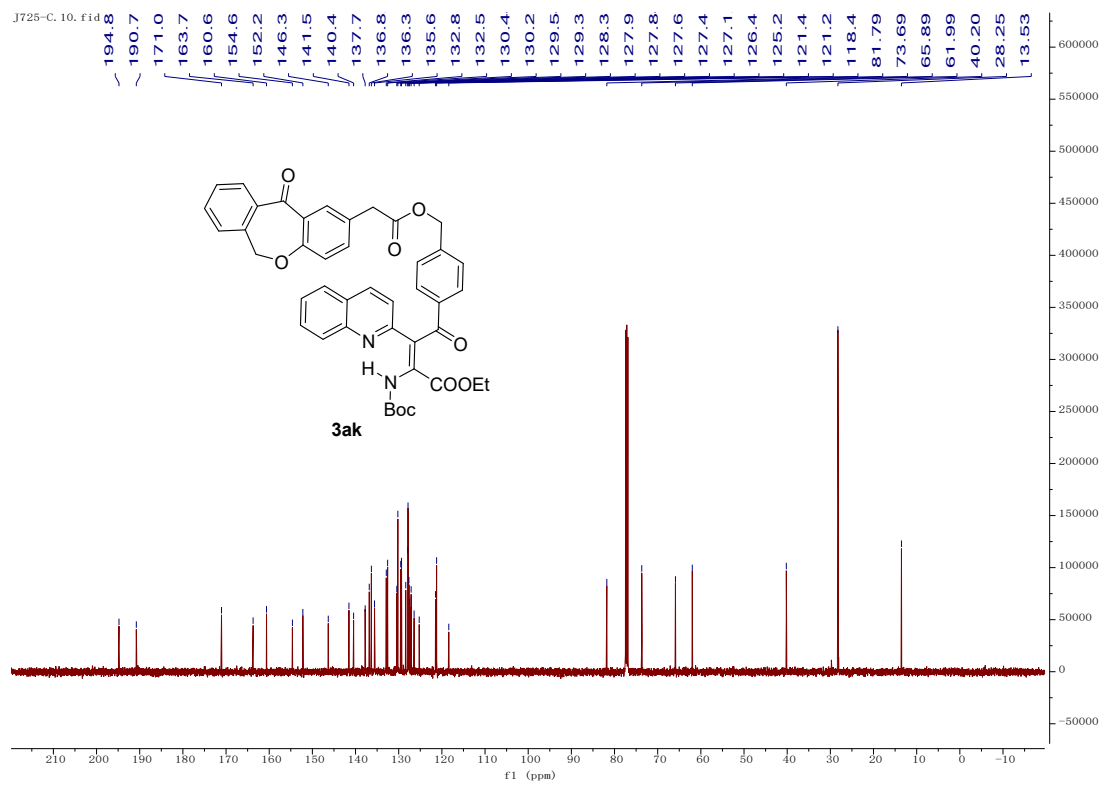

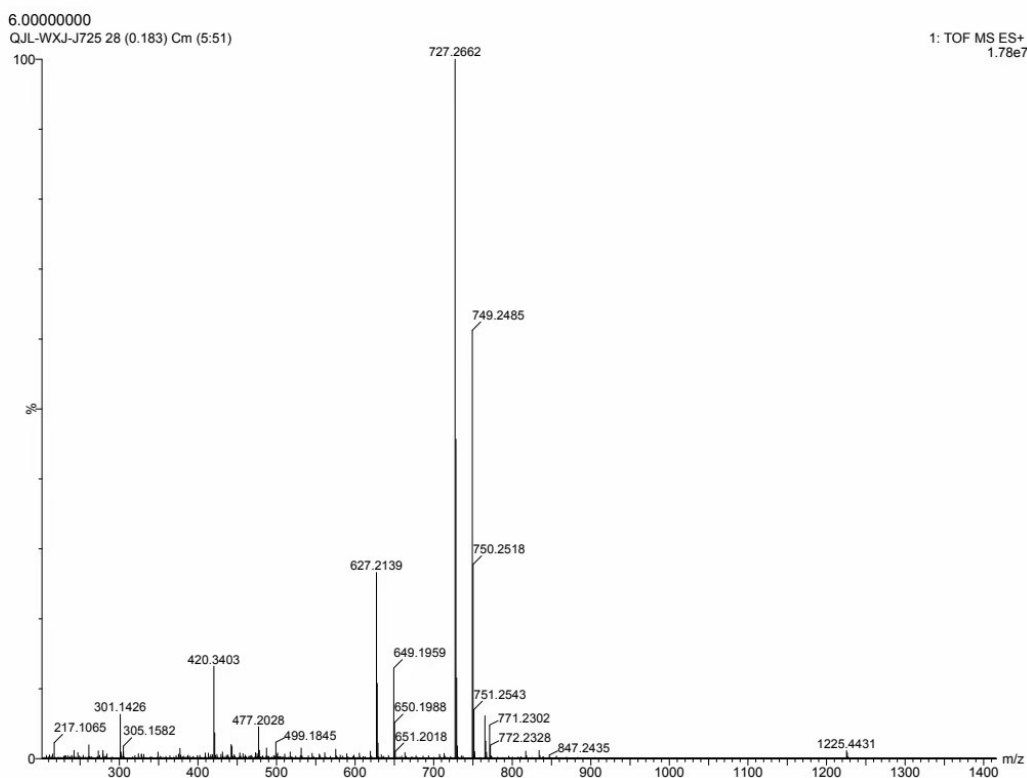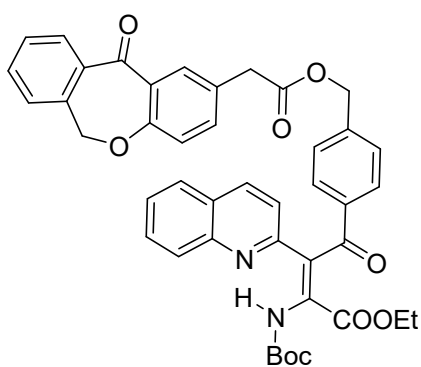

Chemical Formula:  $C_{43}H_{38}N_2O_9$

Exact Mass: 726.2577

Molecular Weight: 726.7820

m/z: 726.2577 (100.0%), 727.2611 (46.5%), 728.2644 (10.6%), 728.2620 (1.8%), 729.2678 (1.6%)

Elemental Analysis: C, 71.06; H, 5.27; N, 3.85; O, 19.81

HRMS (ESI, m/z) calcd for  $C_{43}H_{38}N_2O_9$   $[M+H]^+$  727.2651, found 727.2662.

# 5a

J656-H. 10. fid

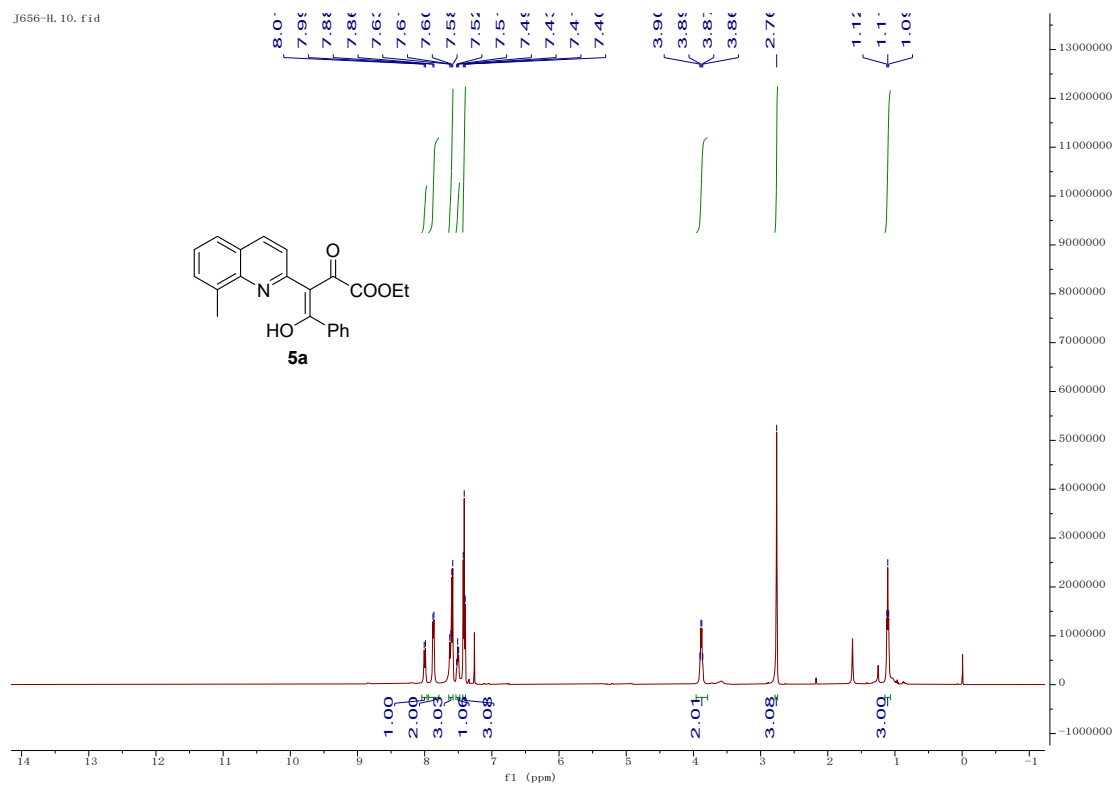

J656-C. 10. fid

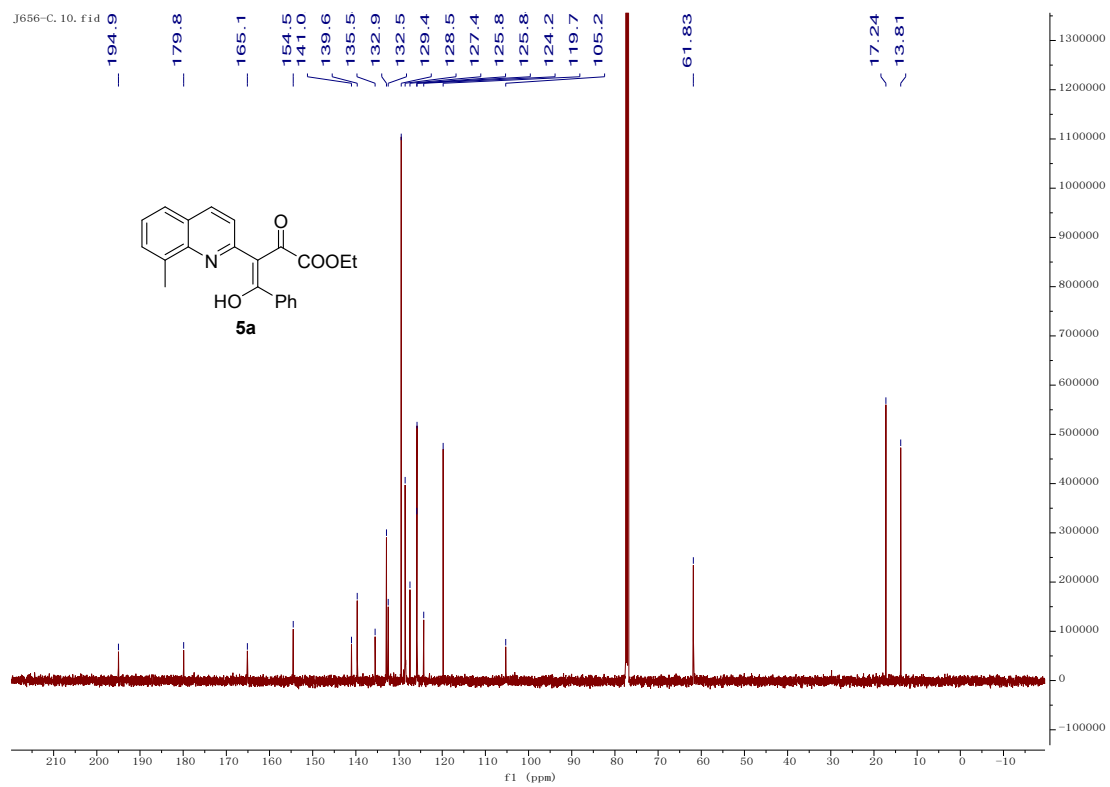

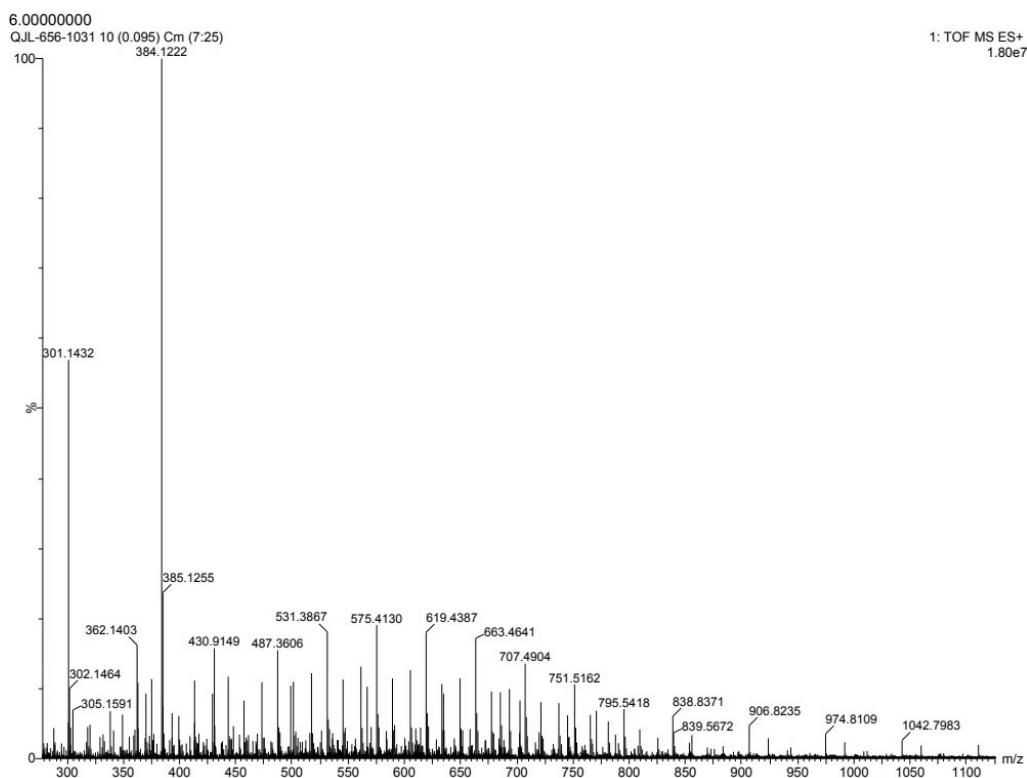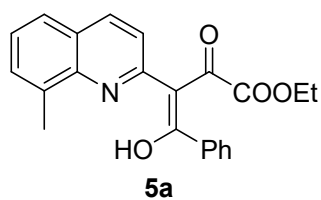

Chemical Formula:  $C_{22}H_{19}NO_4$

Exact Mass: 361.1314

Molecular Weight: 361.3970

m/z: 361.1314 (100.0%), 362.1348 (23.8%), 363.1381 (2.7%)

Elemental Analysis: C, 73.12; H, 5.30; N, 3.88; O, 17.71

HRMS (ESI, m/z) calcd for  $C_{22}H_{19}NO_4$   $[M+Na]^+$  384.1207, found 384.1222.

# 5b

J802-H.10.fid

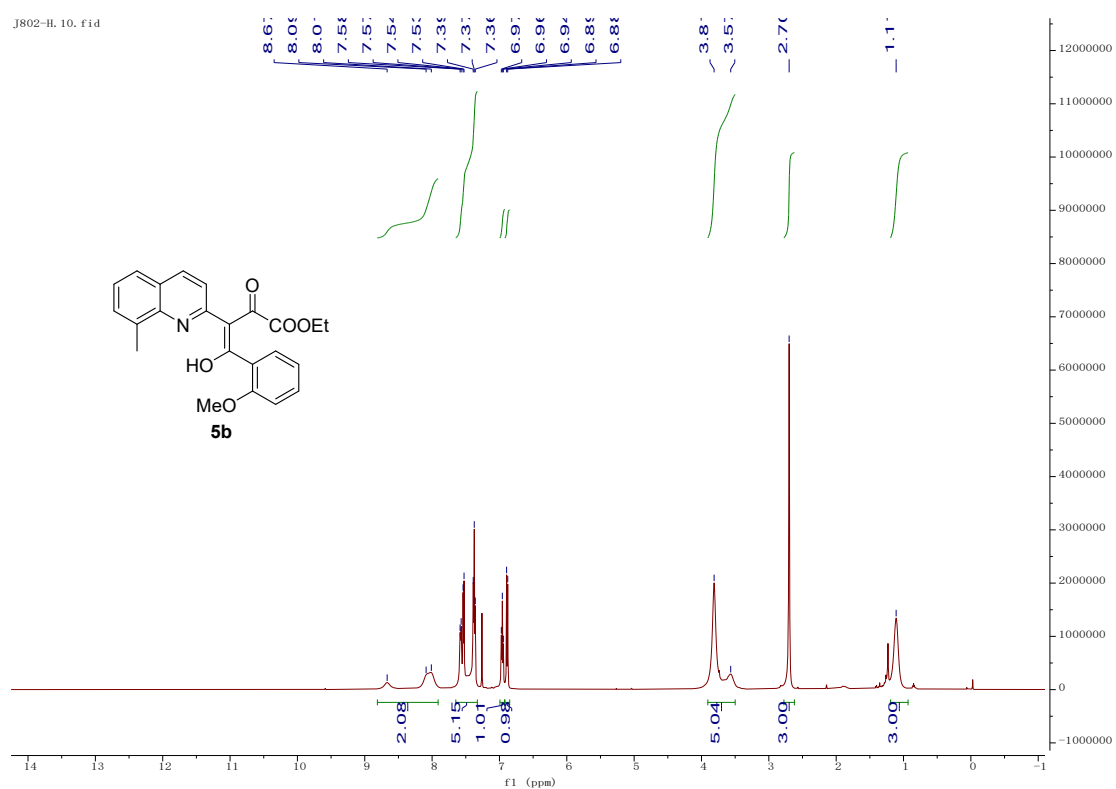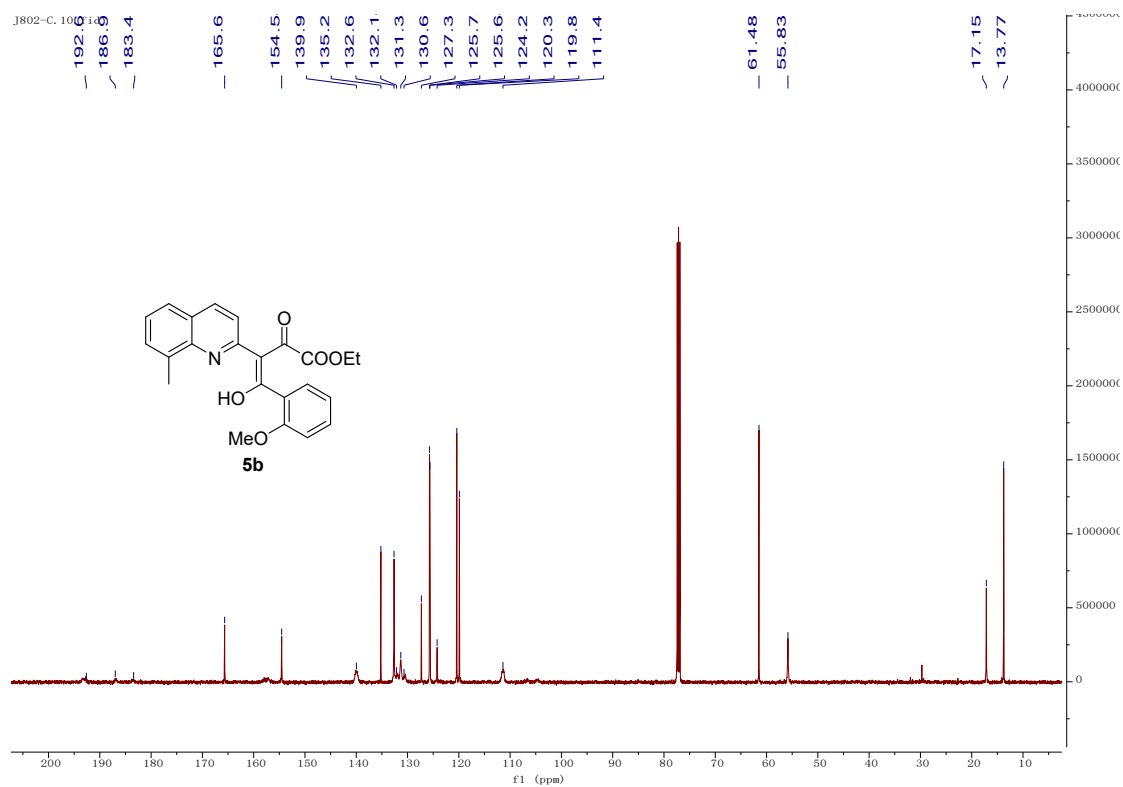

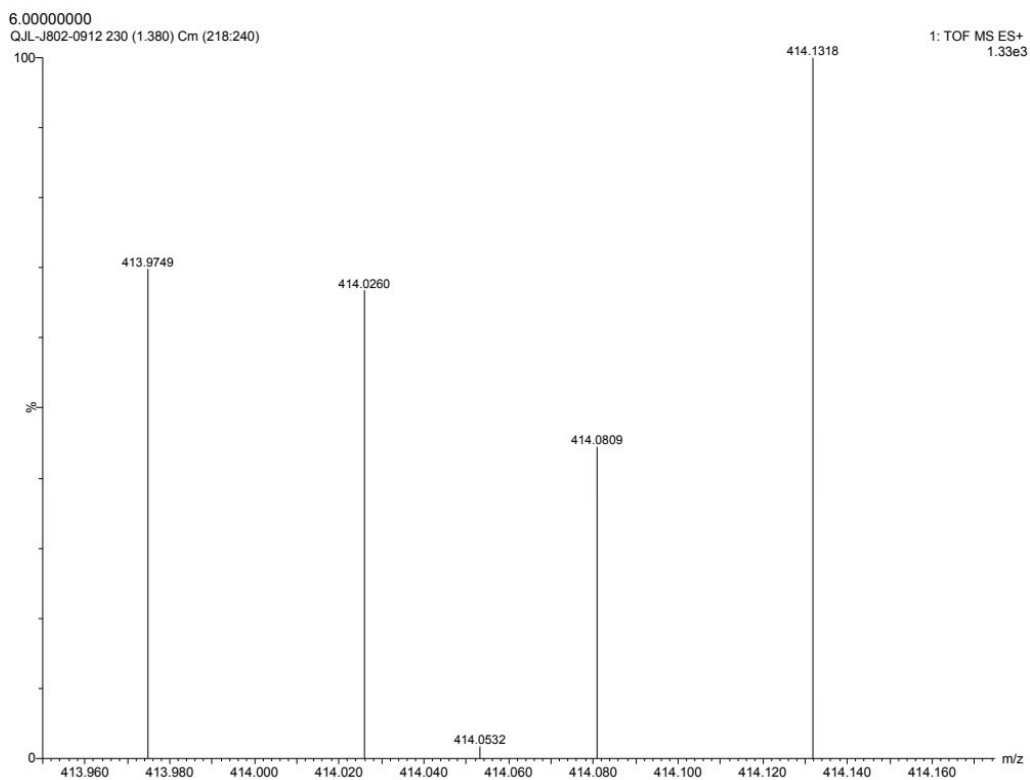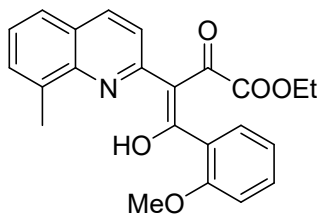

**5b**

Chemical Formula:  $C_{23}H_{21}NO_5$

Exact Mass: 391.1420

Molecular Weight: 391.4230

m/z: 391.1420 (100.0%), 392.1453 (24.9%), 393.1487 (3.0%), 393.1462 (1.0%)

Elemental Analysis: C, 70.58; H, 5.41; N, 3.58; O, 20.44

HRMS (ESI, m/z) calcd for  $C_{23}H_{21}NO_5$   $[M+Na]^+$  414.1312, found 414.1318.

# 5c

J783-H.10.fid

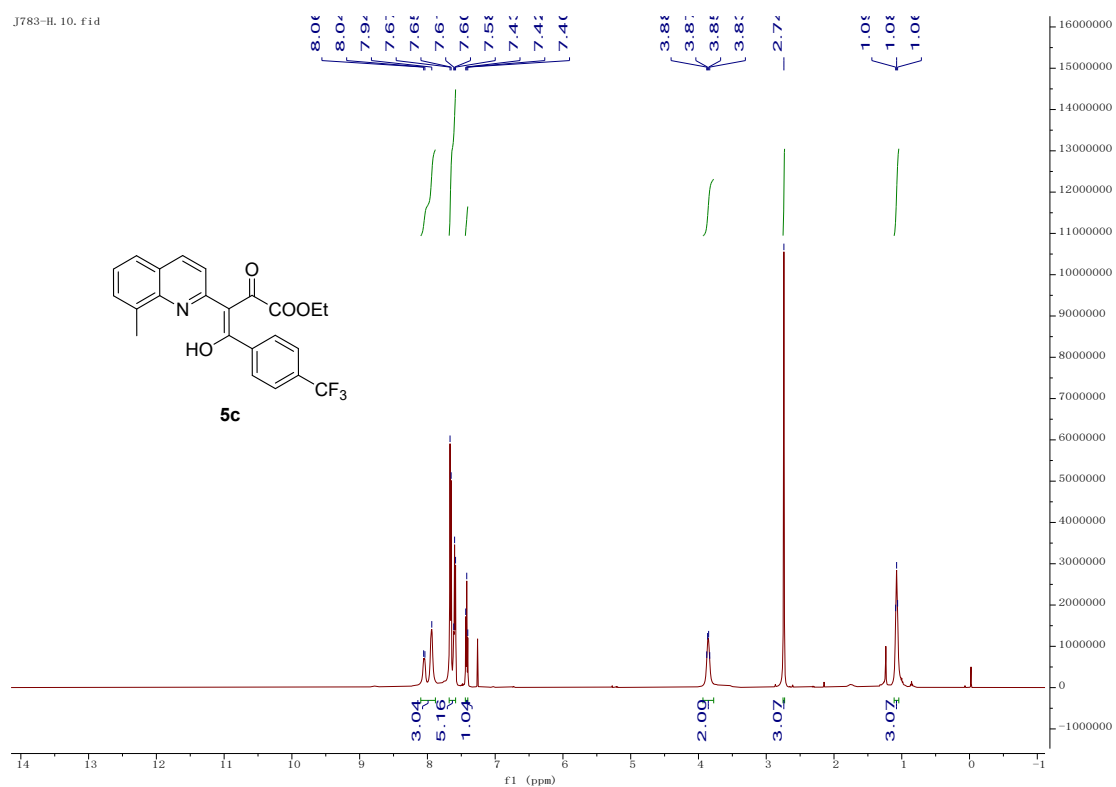

J783-C.10.fid

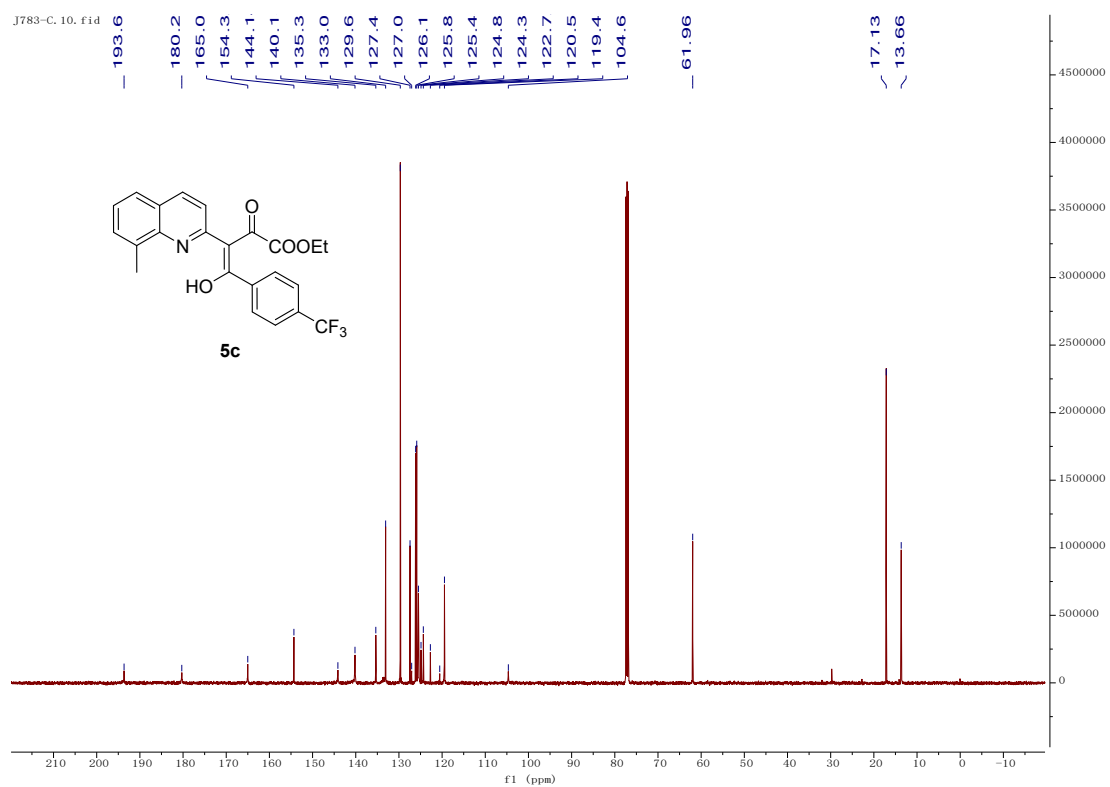

J783-F.10.fid

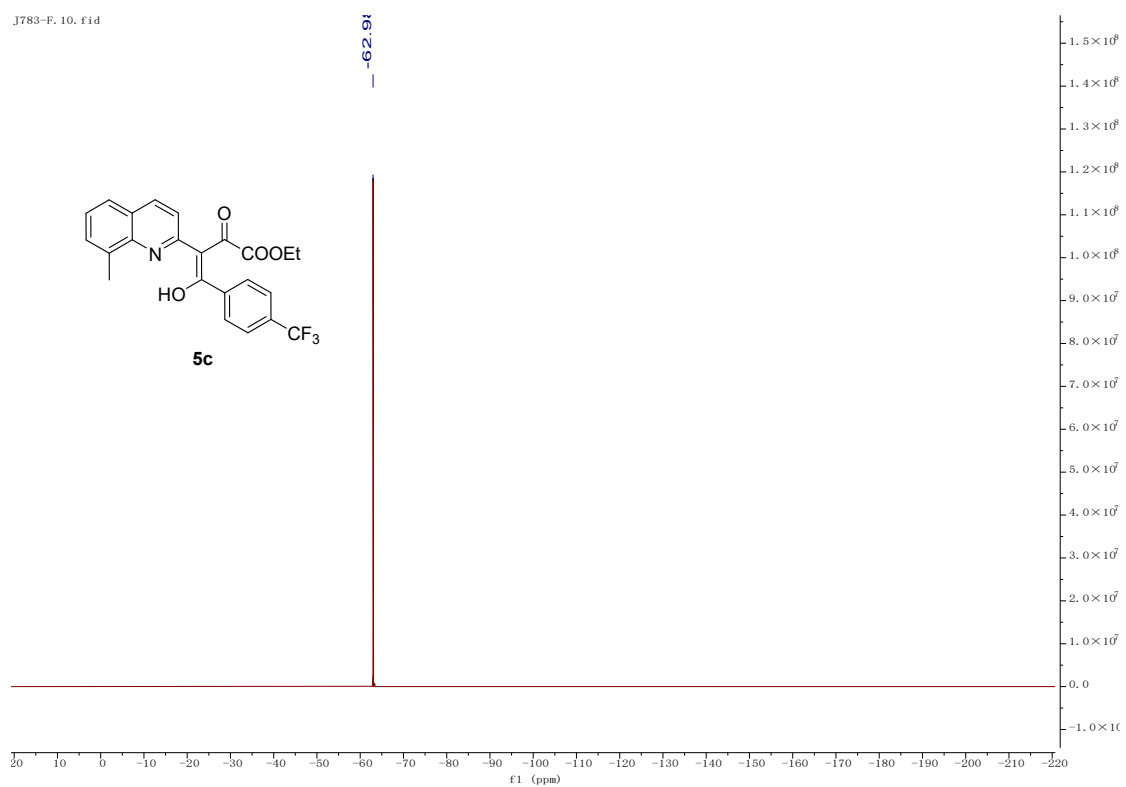

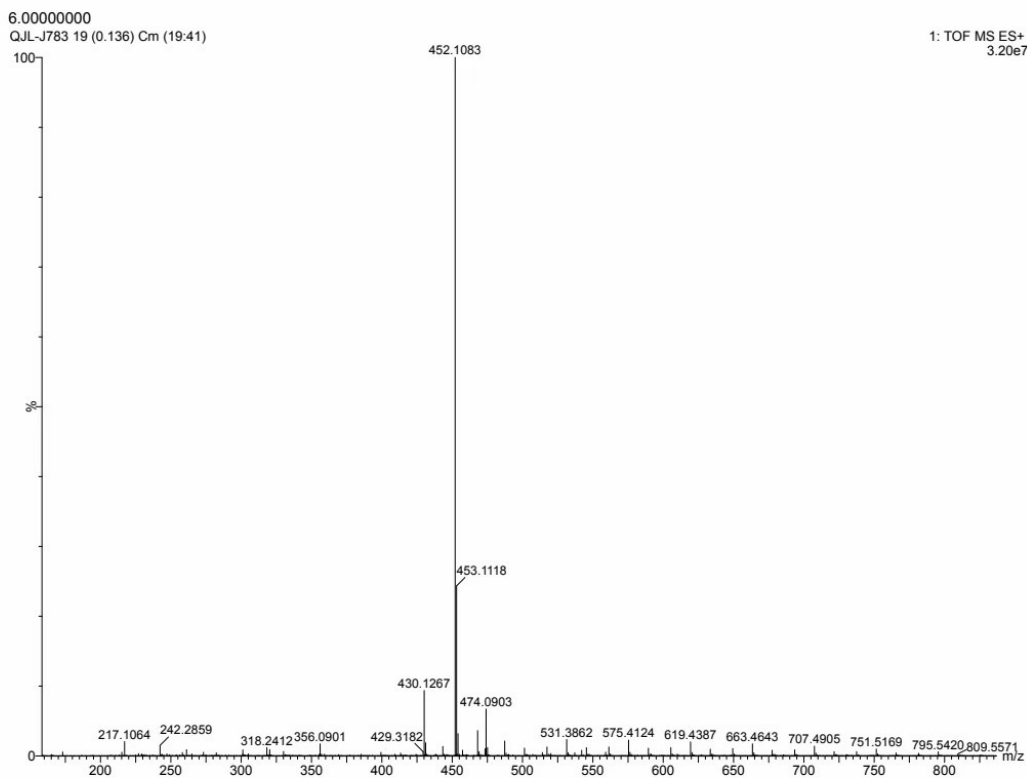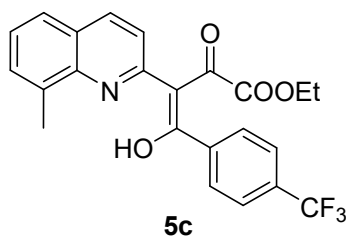

Chemical Formula:  $C_{23}H_{18}F_3NO_4$

Exact Mass: 429.1188

Molecular Weight: 429.3952

m/z: 429.1188 (100.0%), 430.1221 (24.9%), 431.1255 (3.0%)

Elemental Analysis: C, 64.34; H, 4.23; F, 13.27; N, 3.26; O, 14.90

HRMS (ESI, m/z) calcd for  $C_{23}H_{18}F_3NO_4$   $[M+Na]^+$  452.1081, found 452.1083.

# 5d

J782-H.10.fid

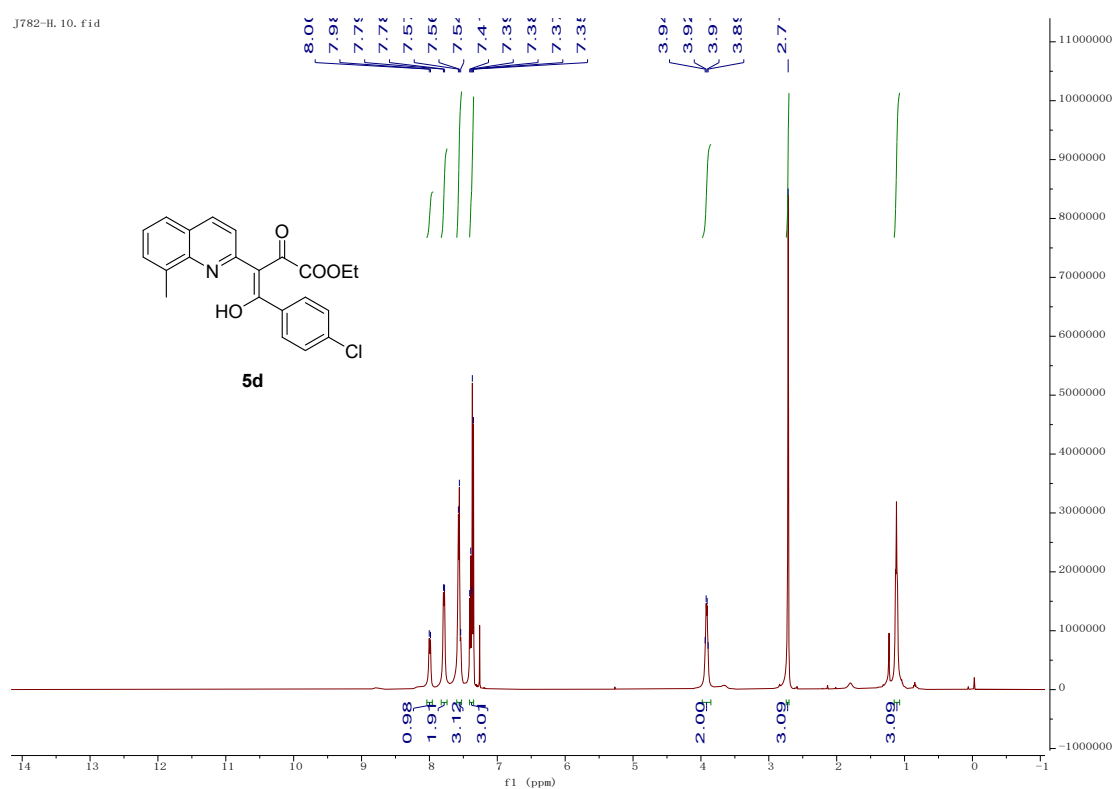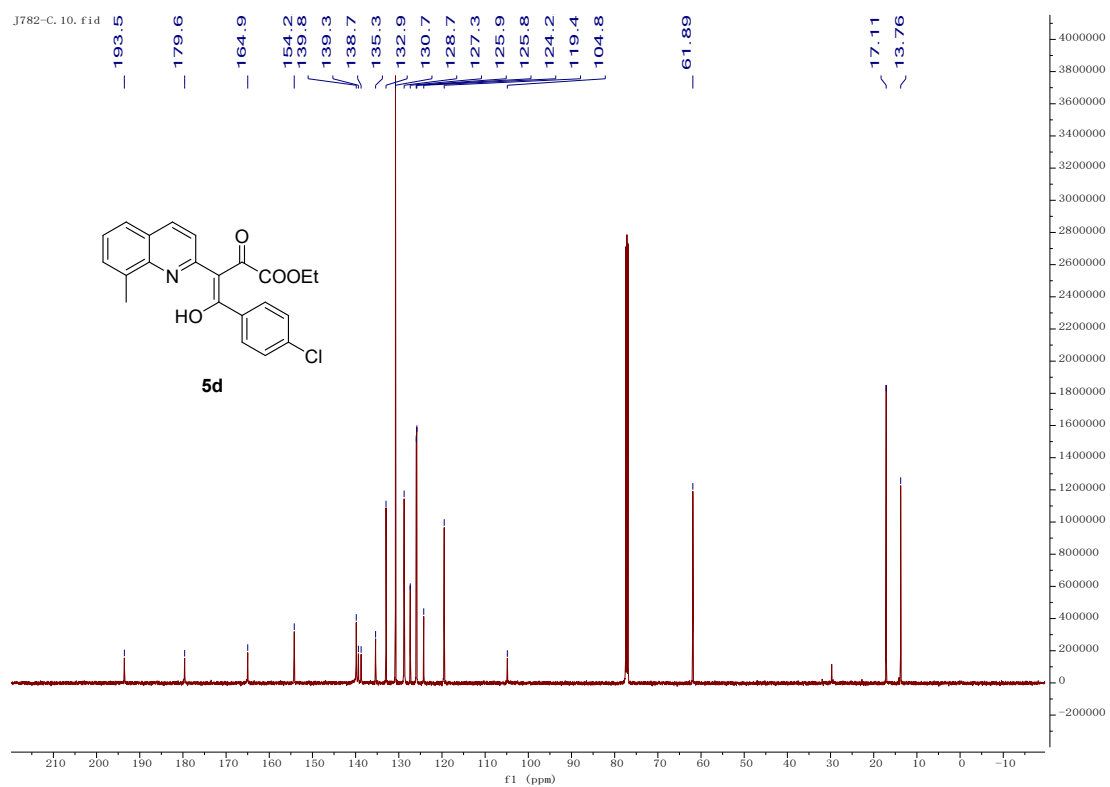

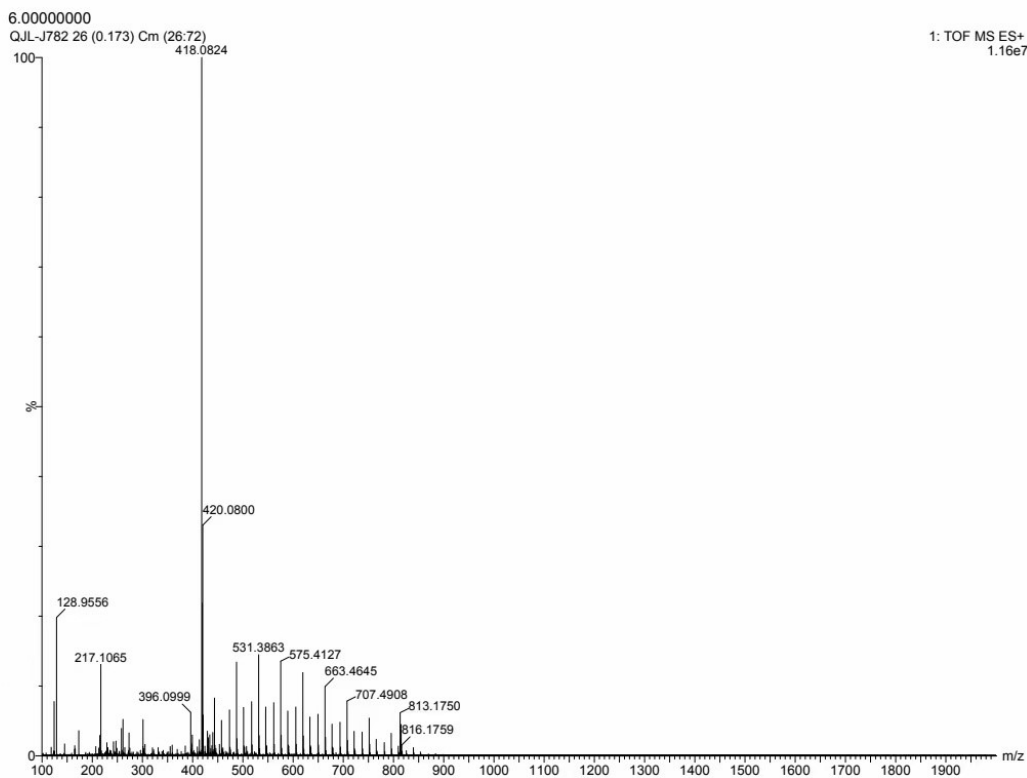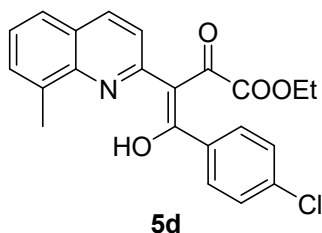

Chemical Formula:  $C_{22}H_{18}ClNO_4$

Exact Mass: 395.0924

Molecular Weight: 395.8390

m/z: 395.0924 (100.0%), 397.0895 (32.0%), 396.0958 (23.8%), 398.0928 (7.6%), 397.0991 (2.7%)

Elemental Analysis: C, 66.75; H, 4.58; Cl, 8.96; N, 3.54; O, 16.17

HRMS (ESI, m/z) calcd for  $C_{22}H_{18}ClNO_4 [M+Na]^+$  418.0817, found 418.0824.

# 5e

J668-H, 10, fid

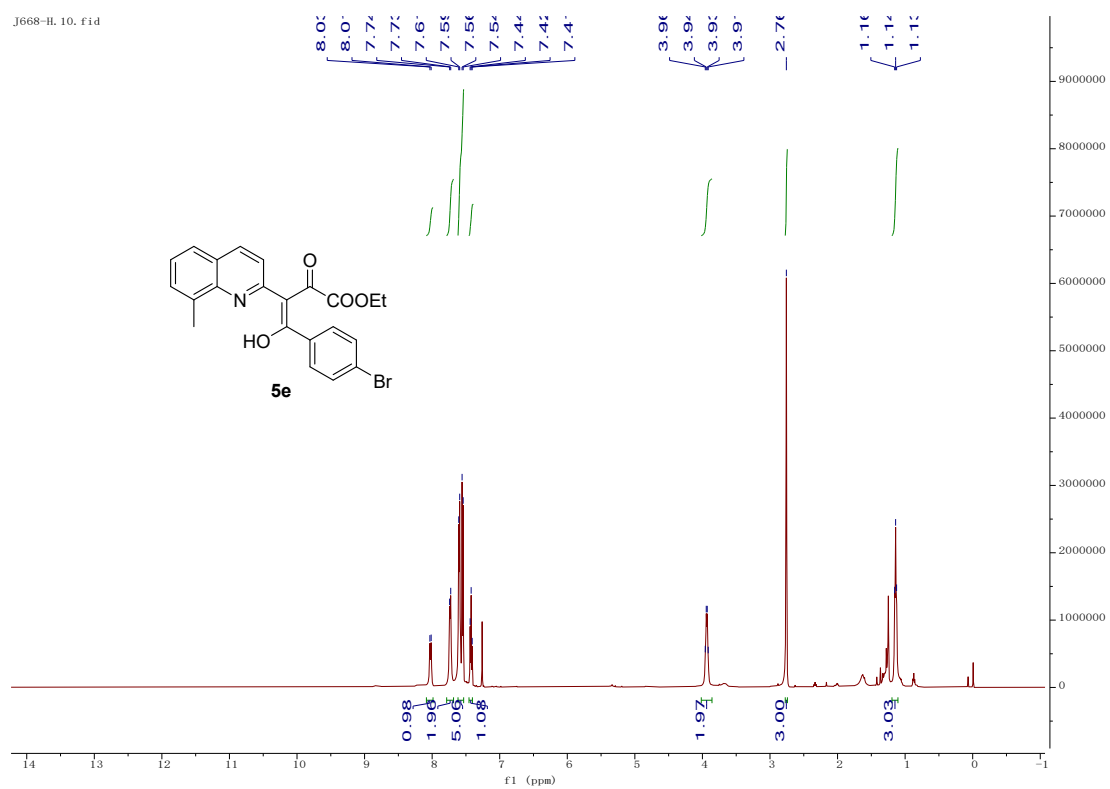

J668-C, 10, fid

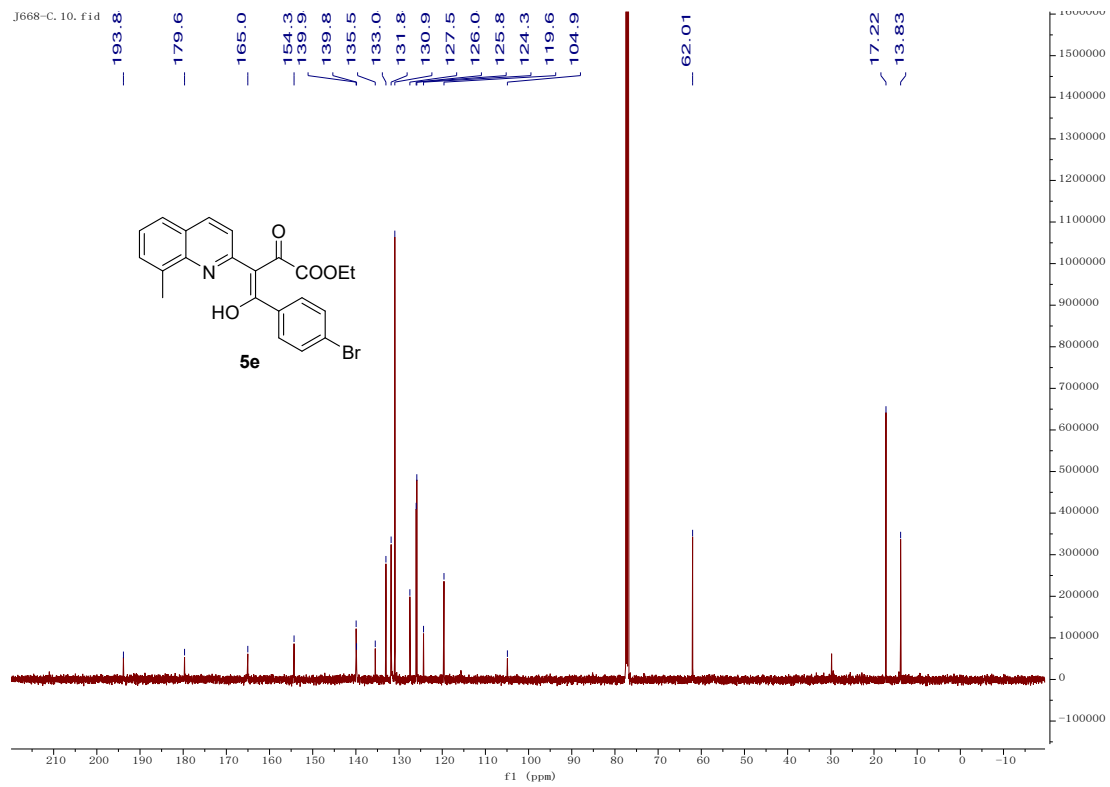

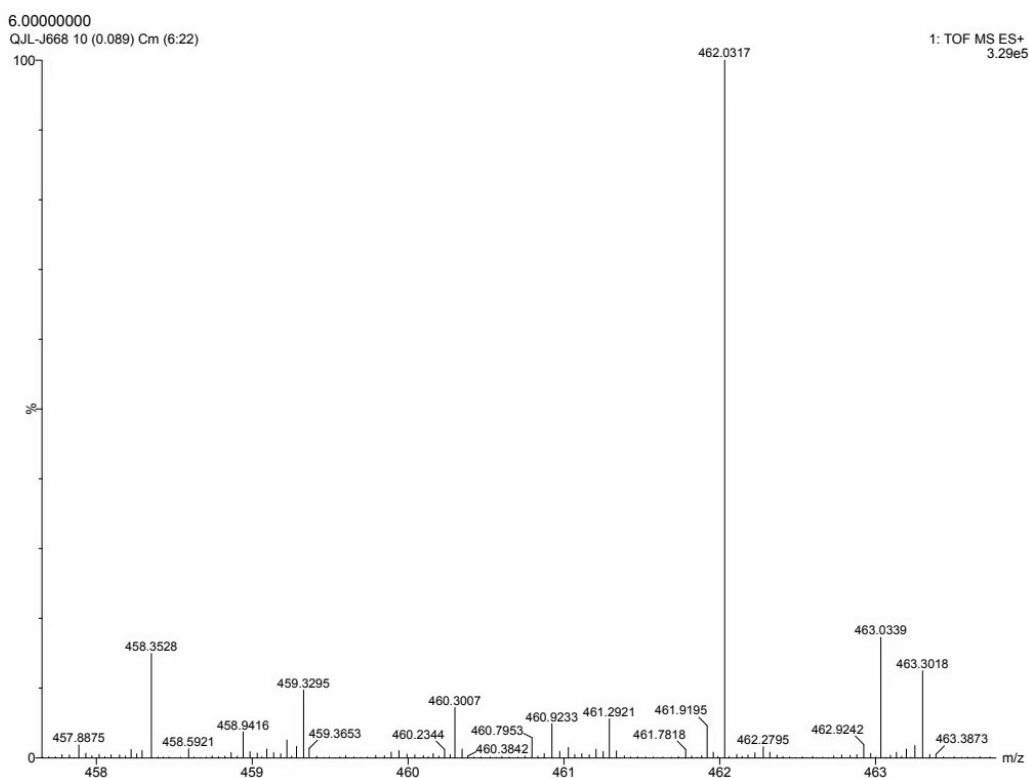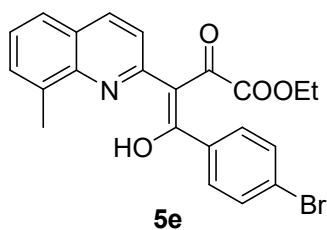

Chemical Formula:  $C_{22}H_{18}BrNO_4$

Exact Mass: 439.0419

Molecular Weight: 440.2930

m/z: 439.0419 (100.0%), 441.0399 (97.3%), 440.0453 (23.8%),

442.0432 (23.1%), 441.0486 (2.7%), 443.0466 (2.6%)

Elemental Analysis: C, 60.02; H, 4.12; Br, 18.15; N, 3.18; O, 14.53

HRMS (ESI, m/z) calcd for  $C_{22}H_{18}BrNO_4 [M+Na]^+$  462.0312, found 462.0317.

# 5f

J792-H, 10. fid

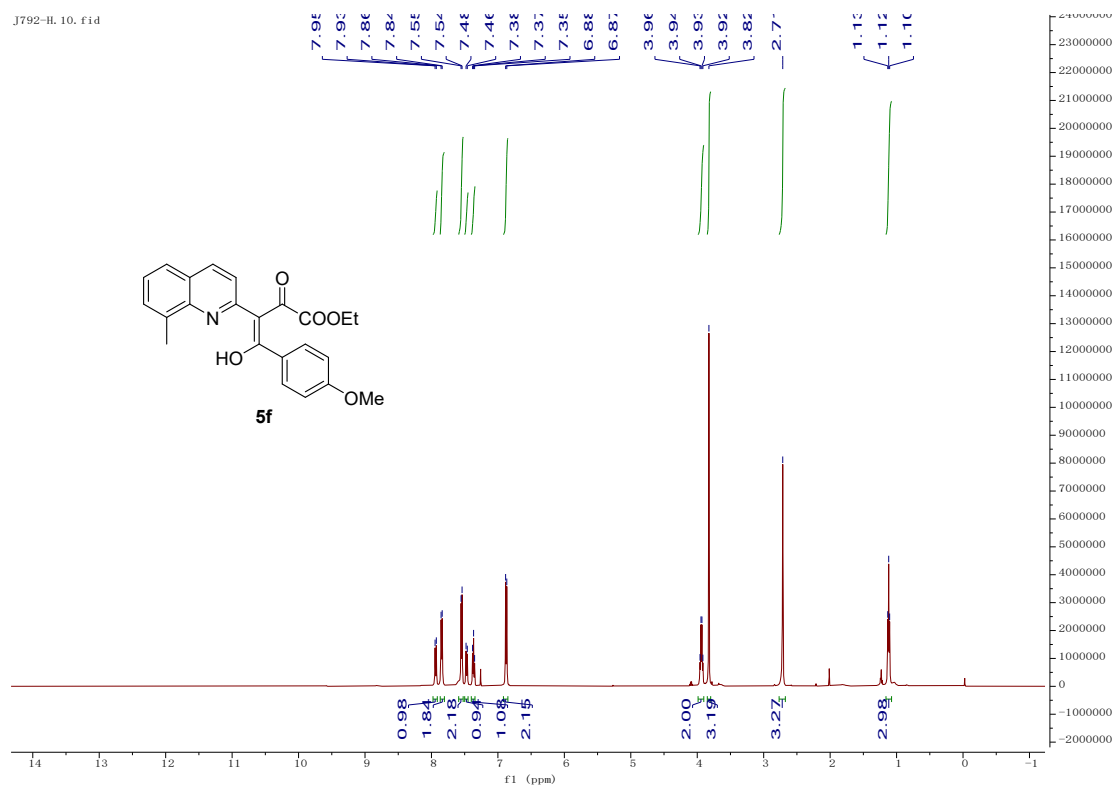

J792-C, 10. fid

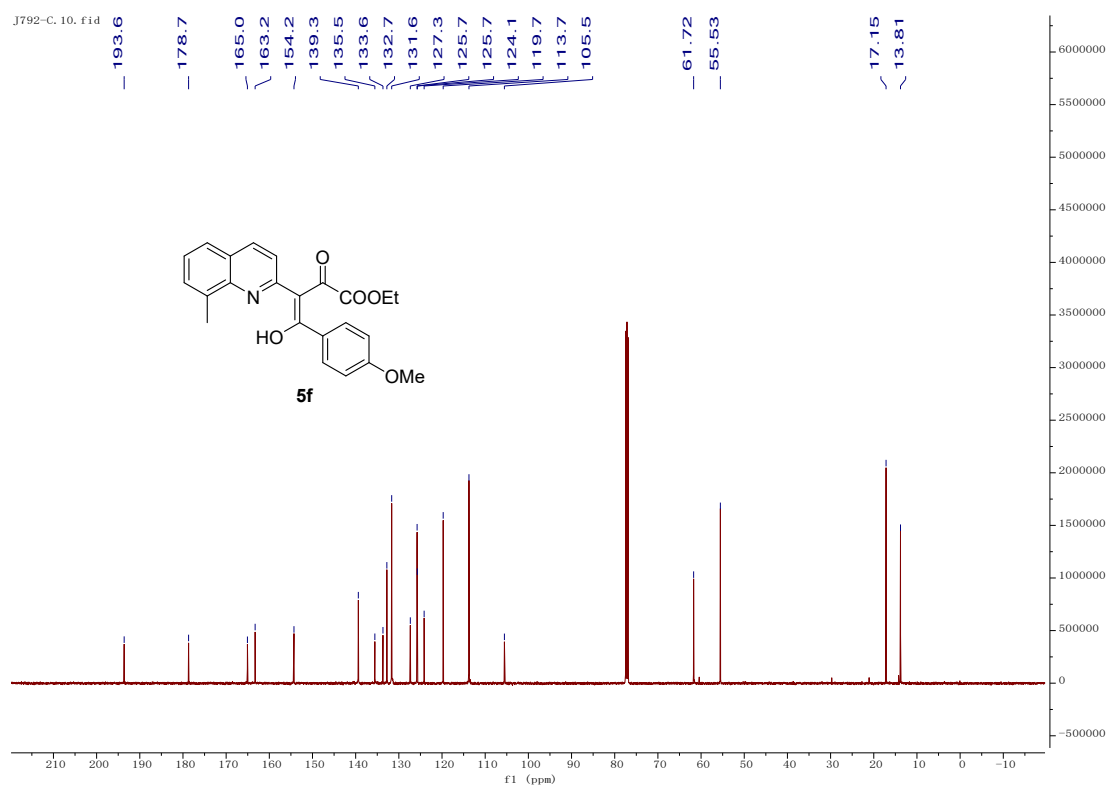

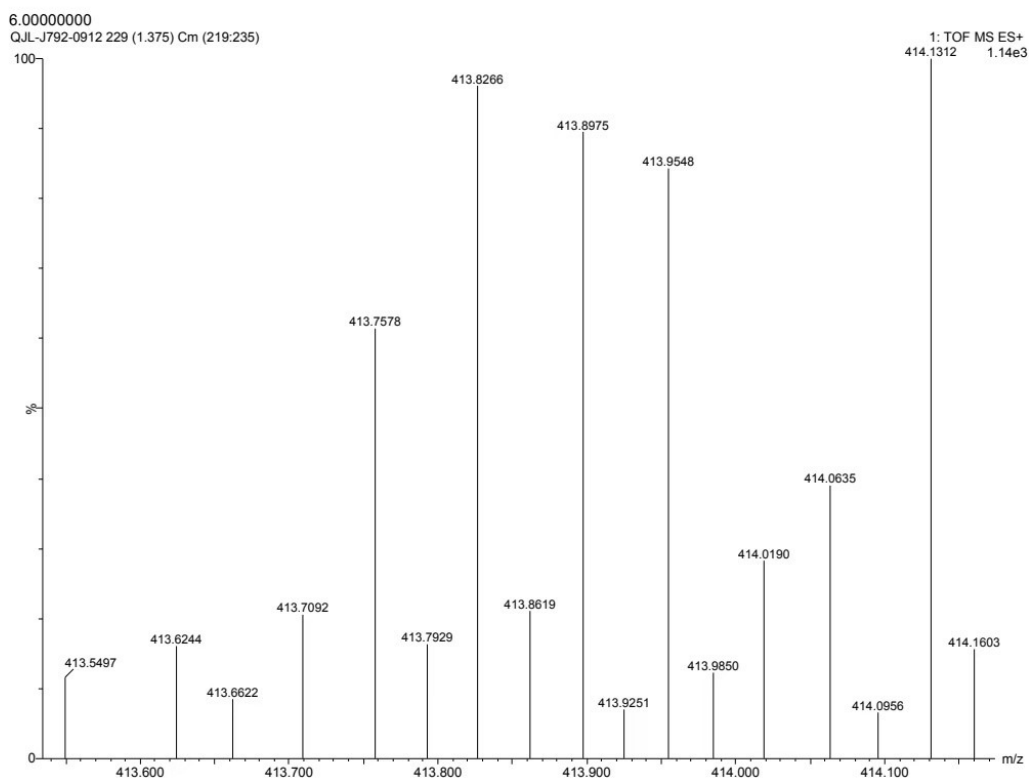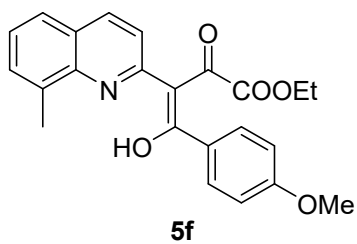

Chemical Formula:  $C_{23}H_{21}NO_5$

Exact Mass: 391.1420

Molecular Weight: 391.4230

m/z: 391.1420 (100.0%), 392.1453 (24.9%), 393.1487 (3.0%), 393.1462 (1.0%)

Elemental Analysis: C, 70.58; H, 5.41; N, 3.58; O, 20.44

HRMS (ESI, m/z) calcd for  $C_{23}H_{21}NO_5$   $[M+Na]^+$  414.1312, found 414.1312.

# 5g

J779-H. 10. fid

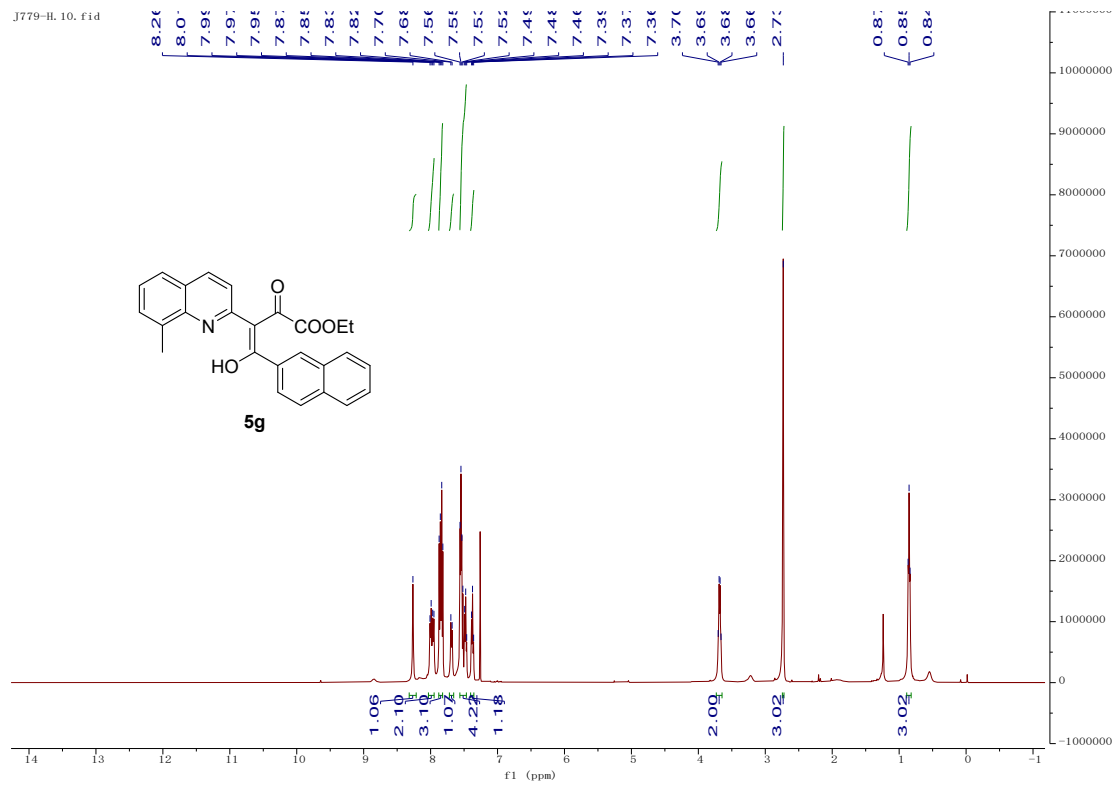

J779-C. 10. fid

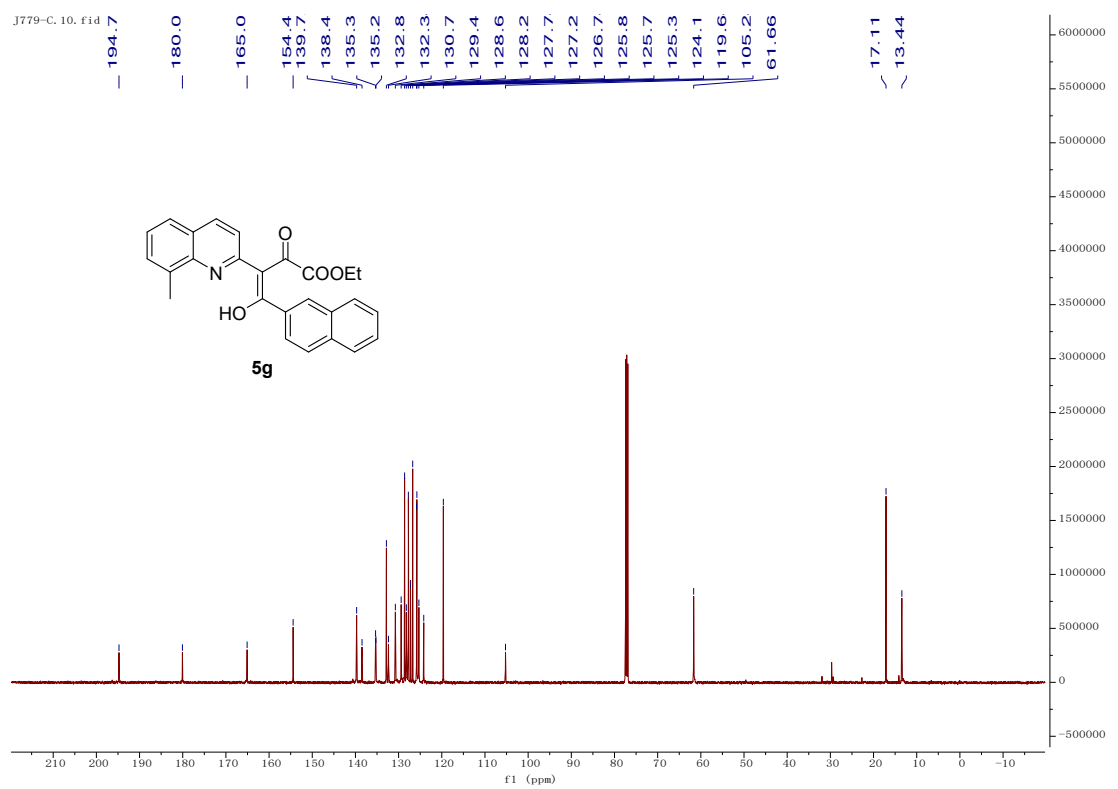

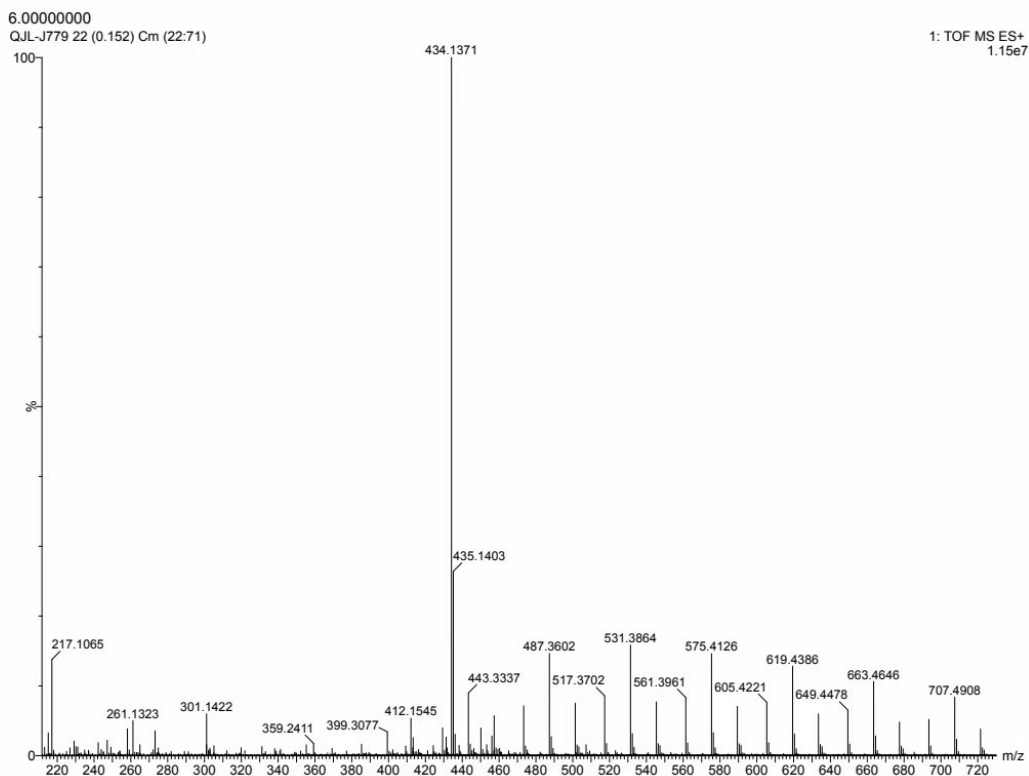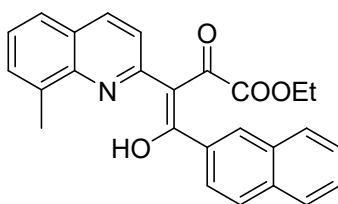

**5g**

Chemical Formula:  $C_{26}H_{21}NO_4$

Exact Mass: 411.1471

Molecular Weight: 411.4570

m/z: 411.1471 (100.0%), 412.1504 (28.1%), 413.1538 (3.8%)

Elemental Analysis: C, 75.90; H, 5.14; N, 3.40; O, 15.55

HRMS (ESI, m/z) calcd for  $C_{26}H_{21}NO_4 [M+Na]^+$  434.1363, found 434.1371.

# 5h

J780-H. 10. f1.d

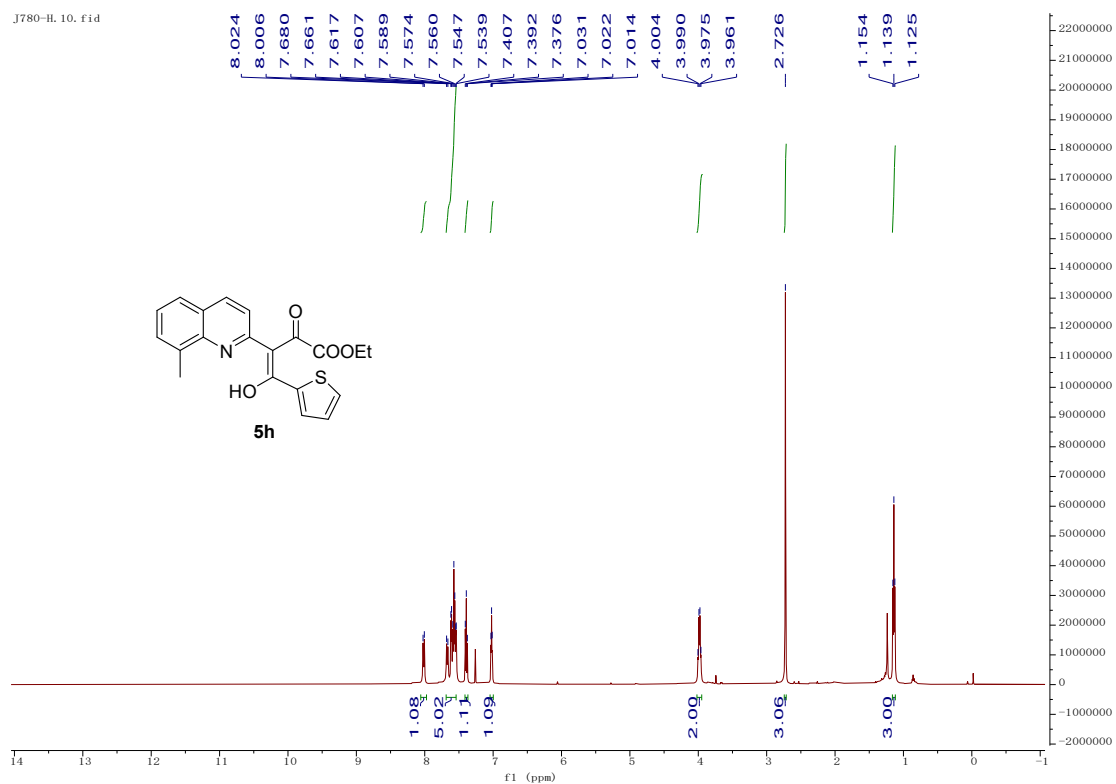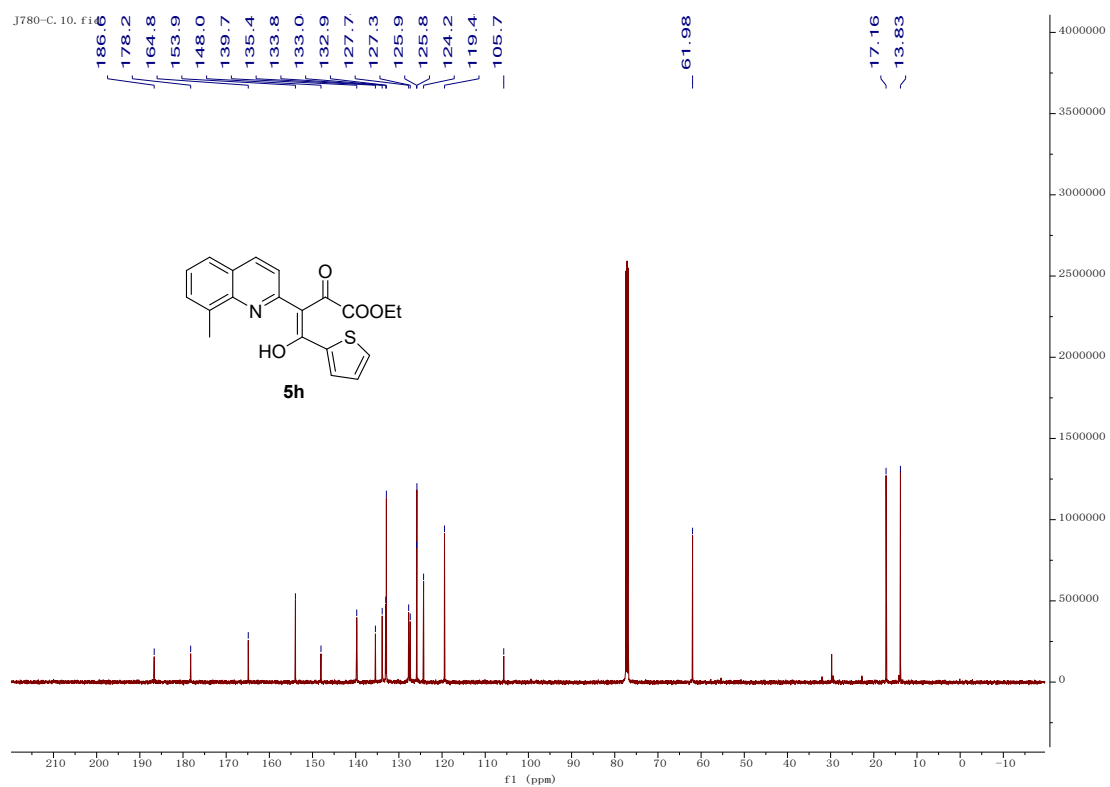

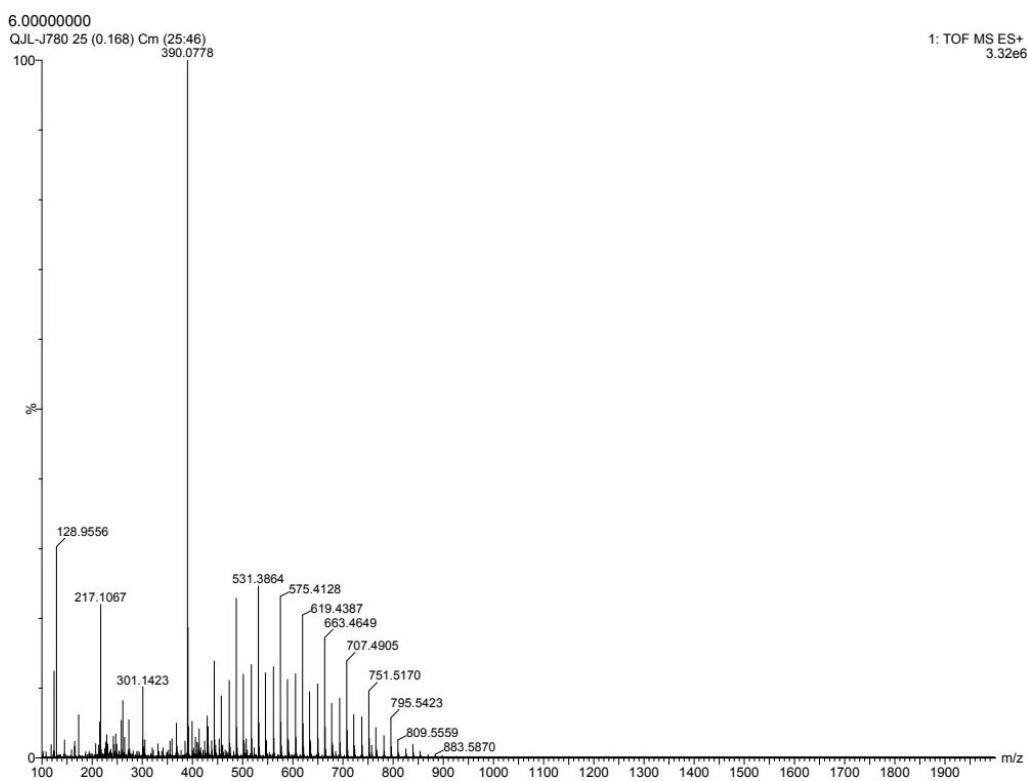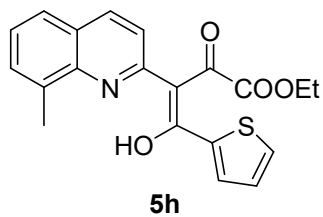

Chemical Formula:  $C_{20}H_{17}NO_4S$

Exact Mass: 367.0878

Molecular Weight: 367.4190

m/z: 367.0878 (100.0%), 368.0912 (21.6%),  
369.0836 (4.5%), 369.0945 (2.2%), 370.0870 (1.0%)

Elemental Analysis: C, 65.38; H, 4.66; N, 3.81; O, 17.42; S, 8.73

HRMS (ESI, m/z) calcd for  $C_{20}H_{17}NO_4S$   $[M+Na]^+$  390.0771, found 390.0778.

5i

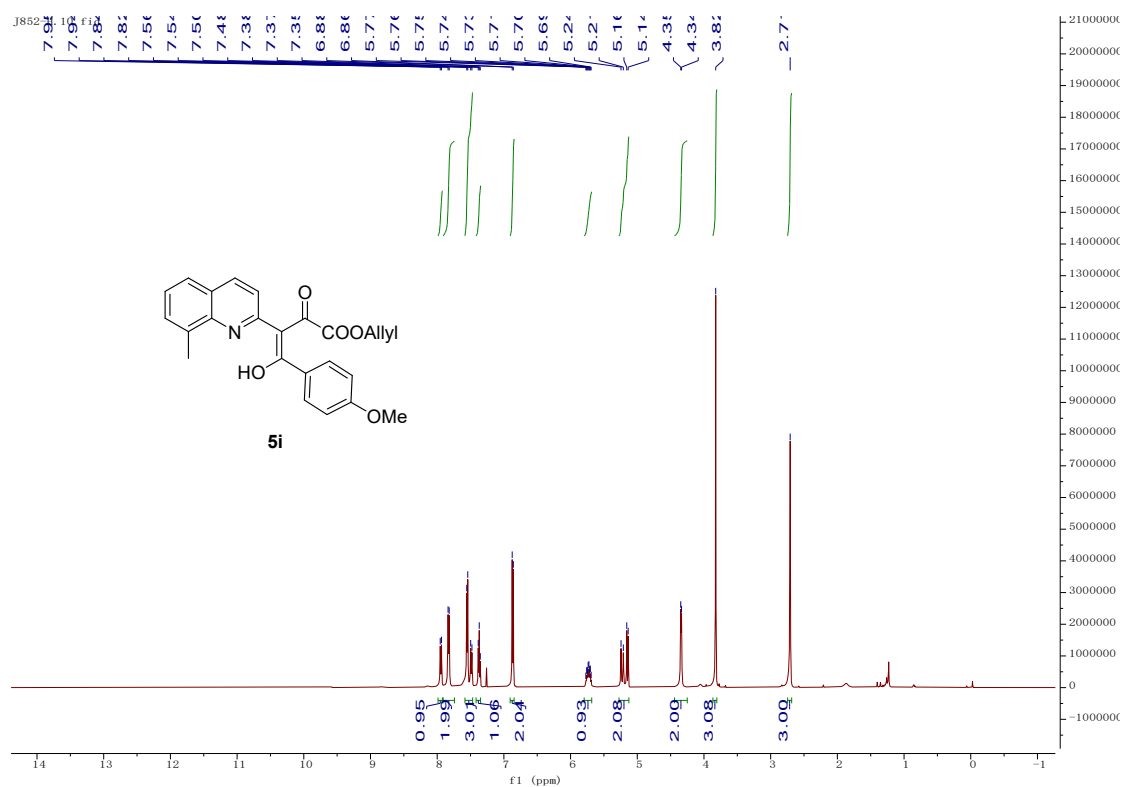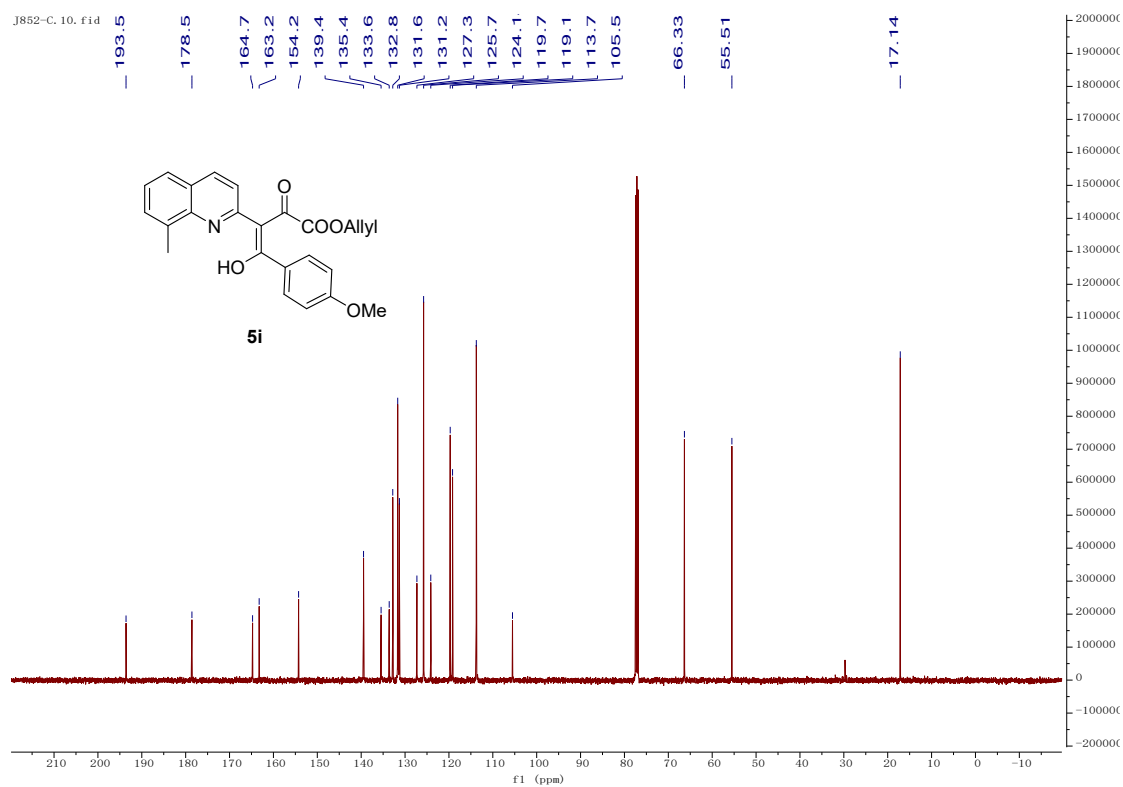

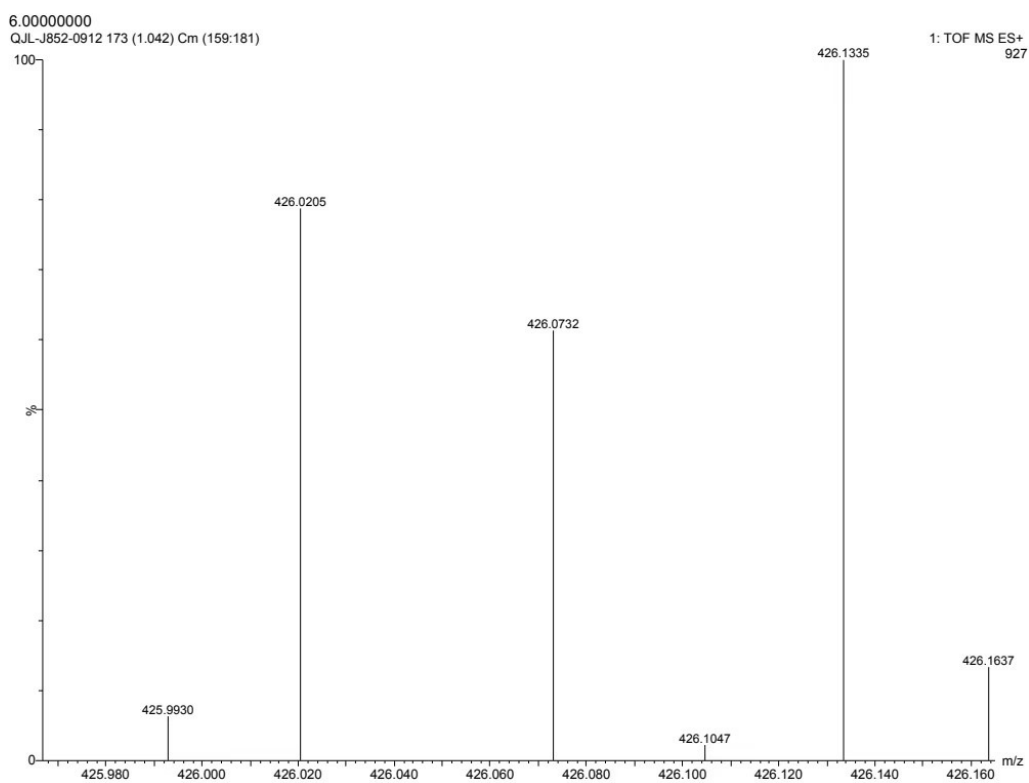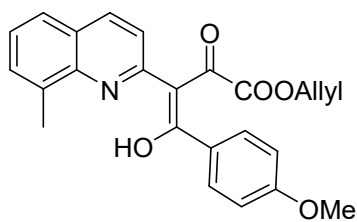

**5i**

Chemical Formula:  $C_{24}H_{21}NO_5$

Exact Mass: 403.1420

Molecular Weight: 403.4340

m/z: 403.1420 (100.0%), 404.1453 (26.0%), 405.1487 (3.2%), 405.1462 (1.0%)

Elemental Analysis: C, 71.45; H, 5.25; N, 3.47; O, 19.83

HRMS (ESI, m/z) calcd for  $C_{24}H_{21}NO_5$   $[M+Na]^+$  426.1312, found 426.1335.

# 5j

J789-2-H.10.f1d

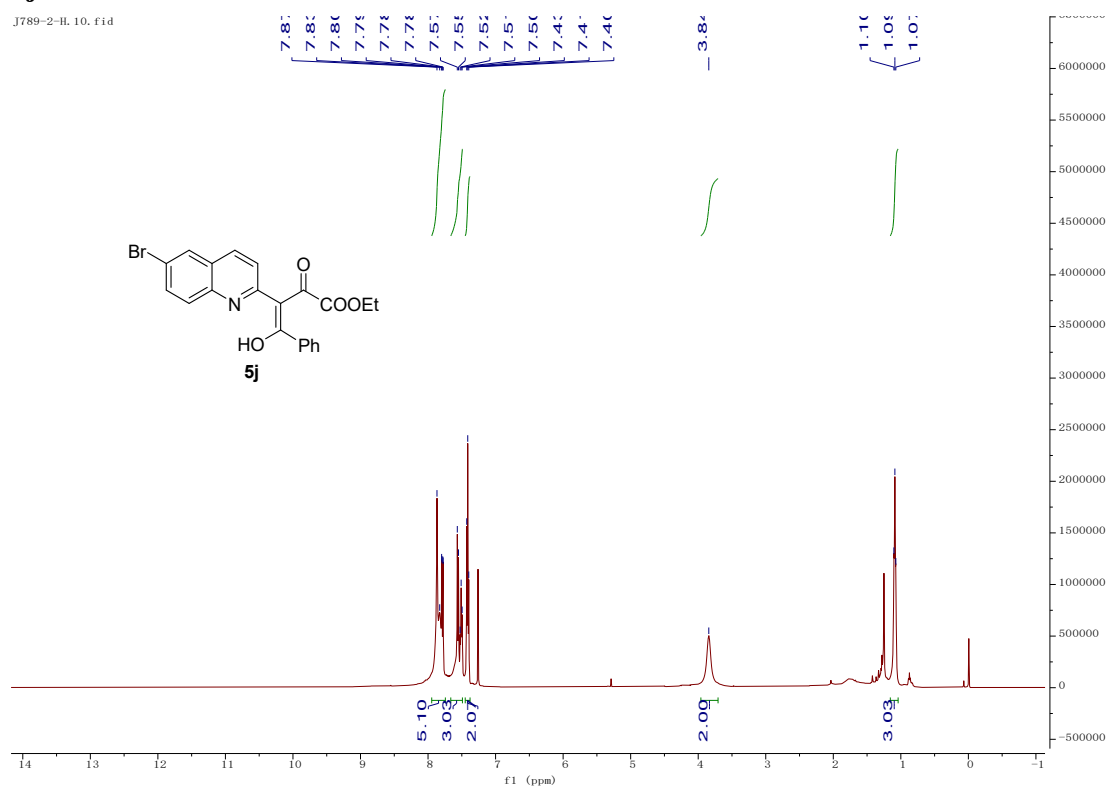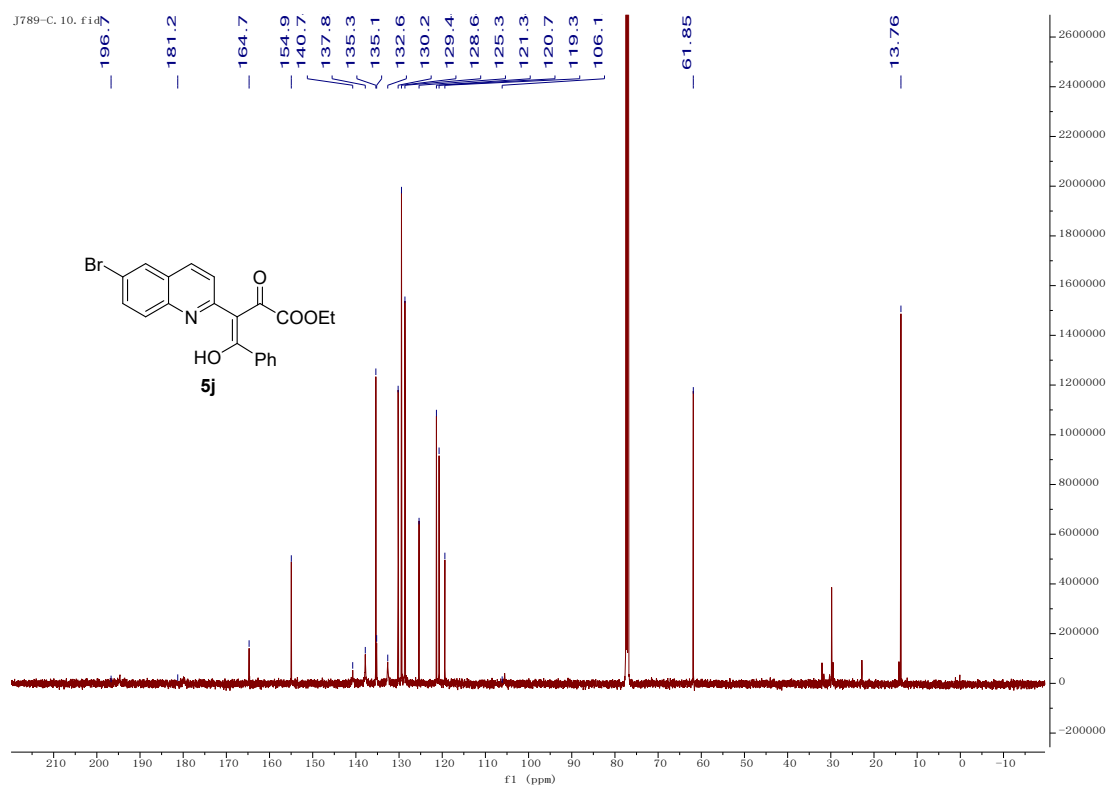

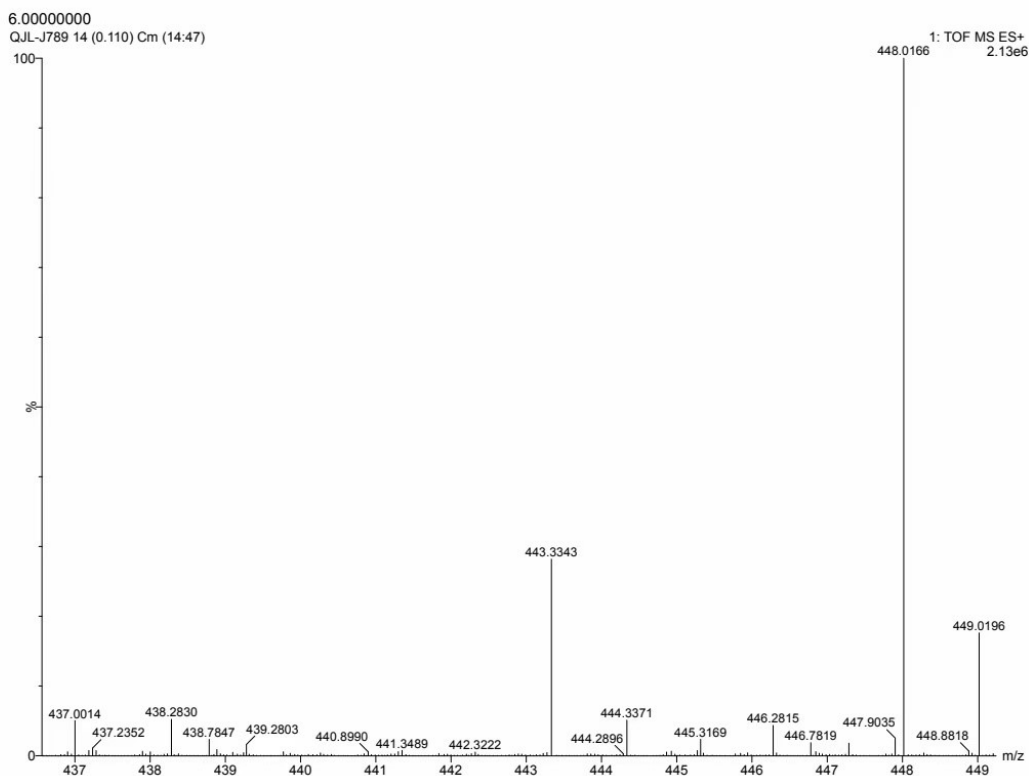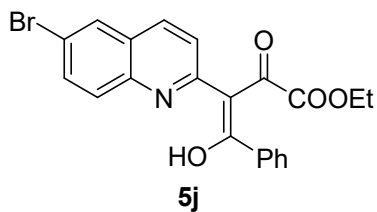

Chemical Formula:  $C_{21}H_{16}BrNO_4$

Exact Mass: 425.0263

Molecular Weight: 426.2660

m/z: 425.0263 (100.0%), 427.0242 (97.3%), 426.0296 (22.7%),

428.0276 (22.1%), 427.0330 (2.5%), 429.0309 (2.4%)

Elemental Analysis: C, 59.17; H, 3.78; Br, 18.75; N, 3.29; O, 15.01

HRMS (ESI, m/z) calcd for  $C_{21}H_{16}BrNO_4$   $[M+Na]^+$  448.0155, found 448.0166.

# 5k

J656-H.10.fid

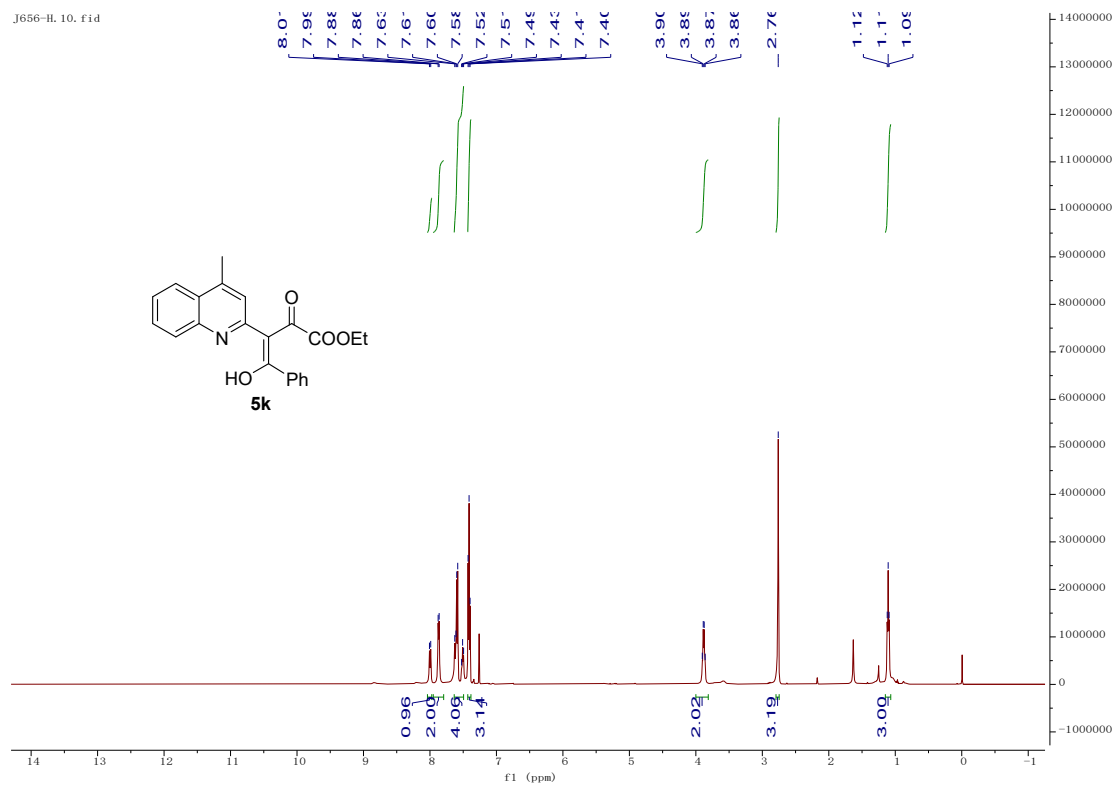

J773-1-C.10.fid

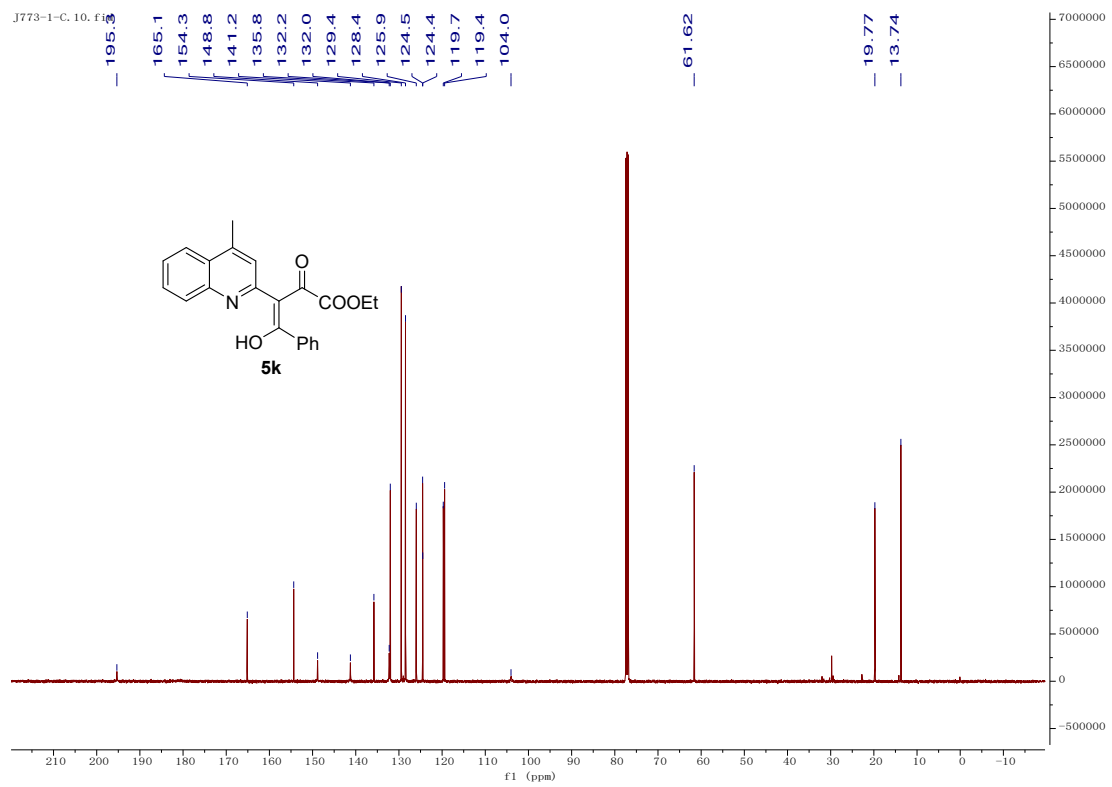

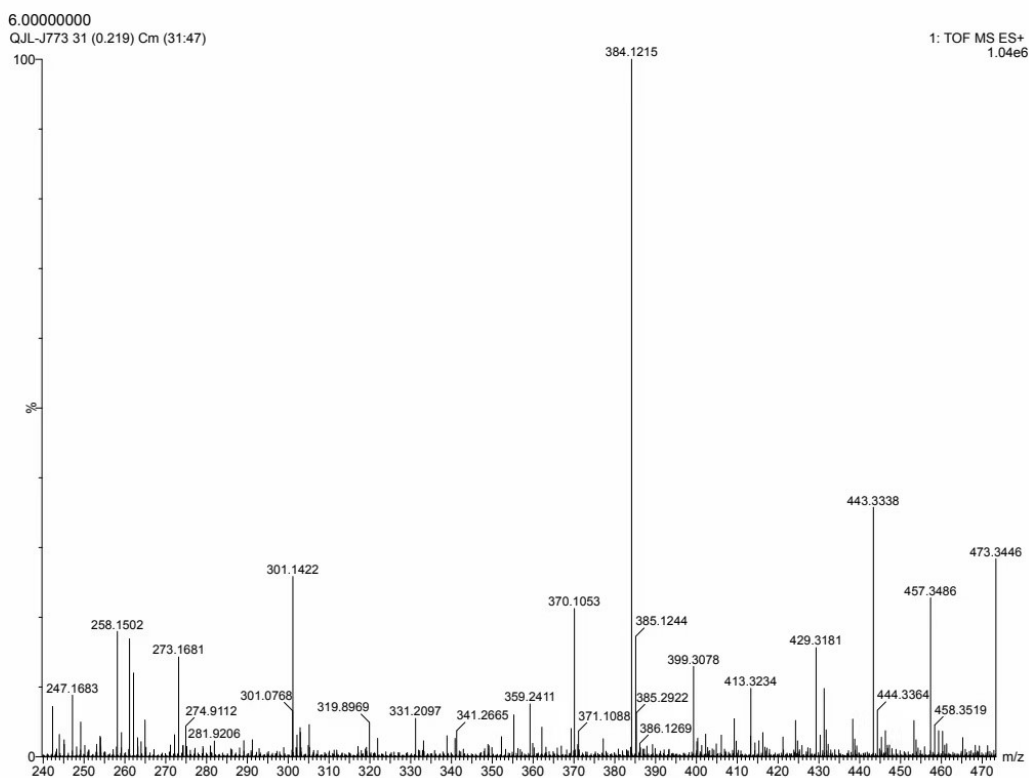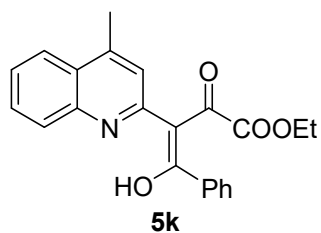

Chemical Formula:  $C_{22}H_{19}NO_4$

Exact Mass: 361.1314

Molecular Weight: 361.3970

m/z: 361.1314 (100.0%), 362.1348 (23.8%), 363.1381 (2.7%)

Elemental Analysis: C, 73.12; H, 5.30; N, 3.88; O, 17.71

HRMS (ESI, m/z) calcd for  $C_{22}H_{19}NO_4 [M+Na]^+$  384.1207, found 384.1215.

51

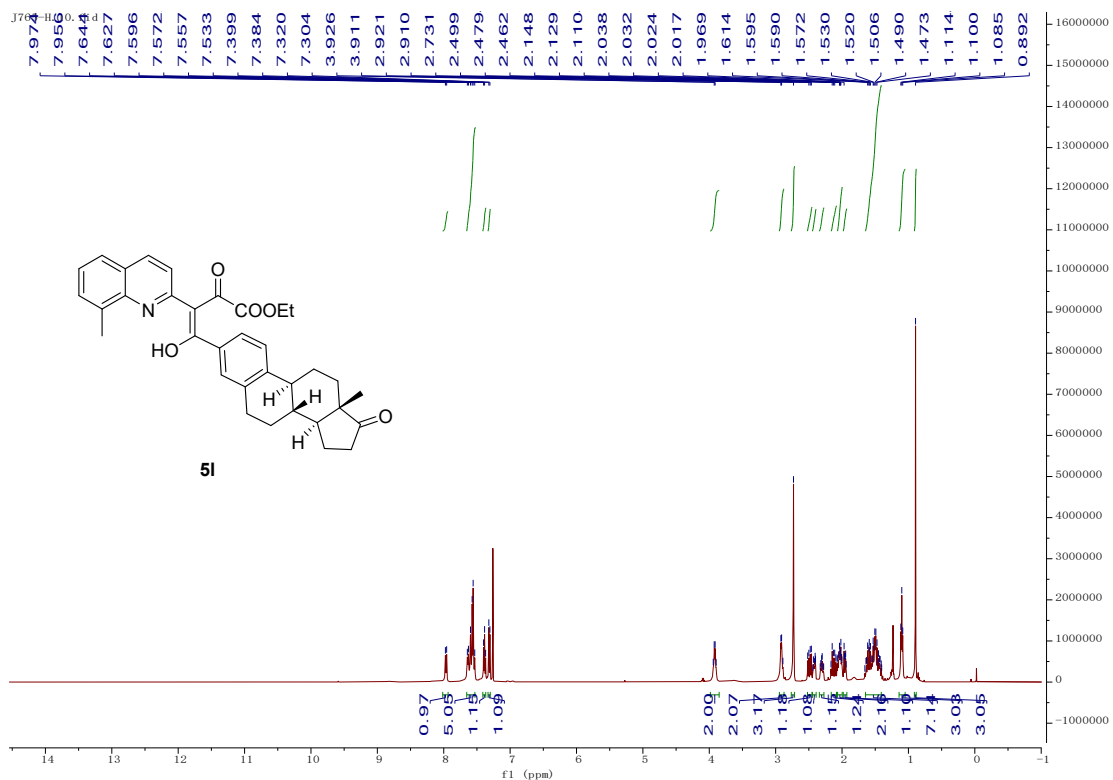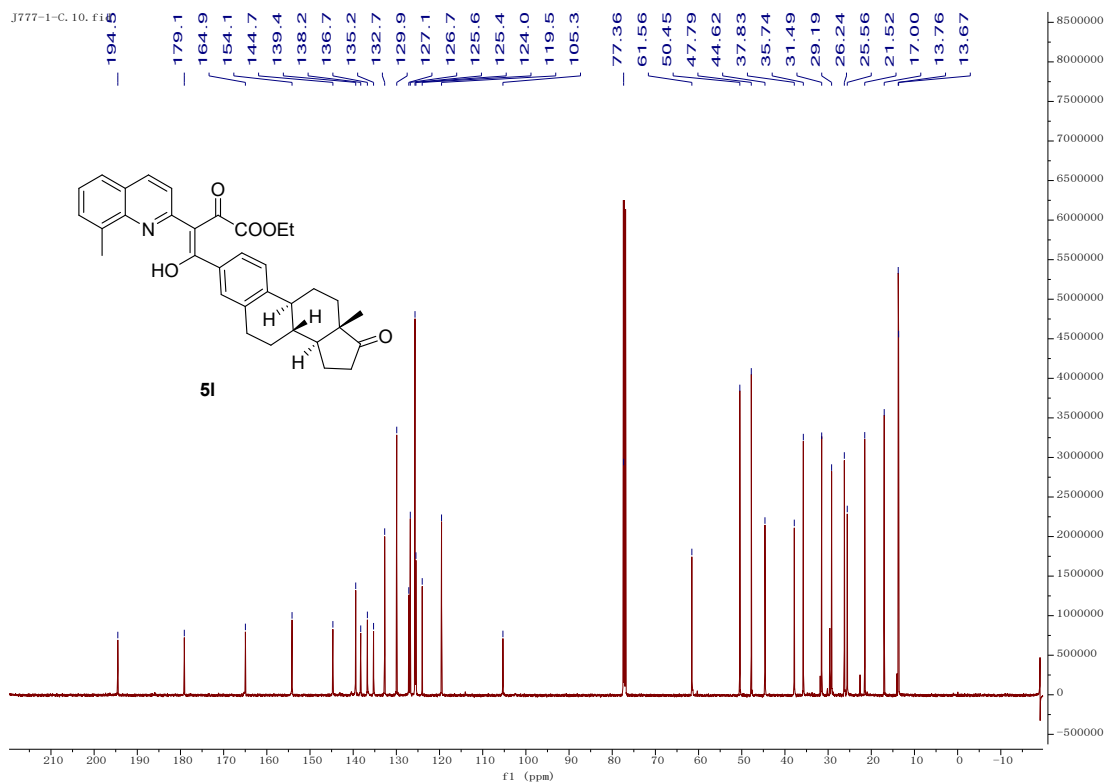

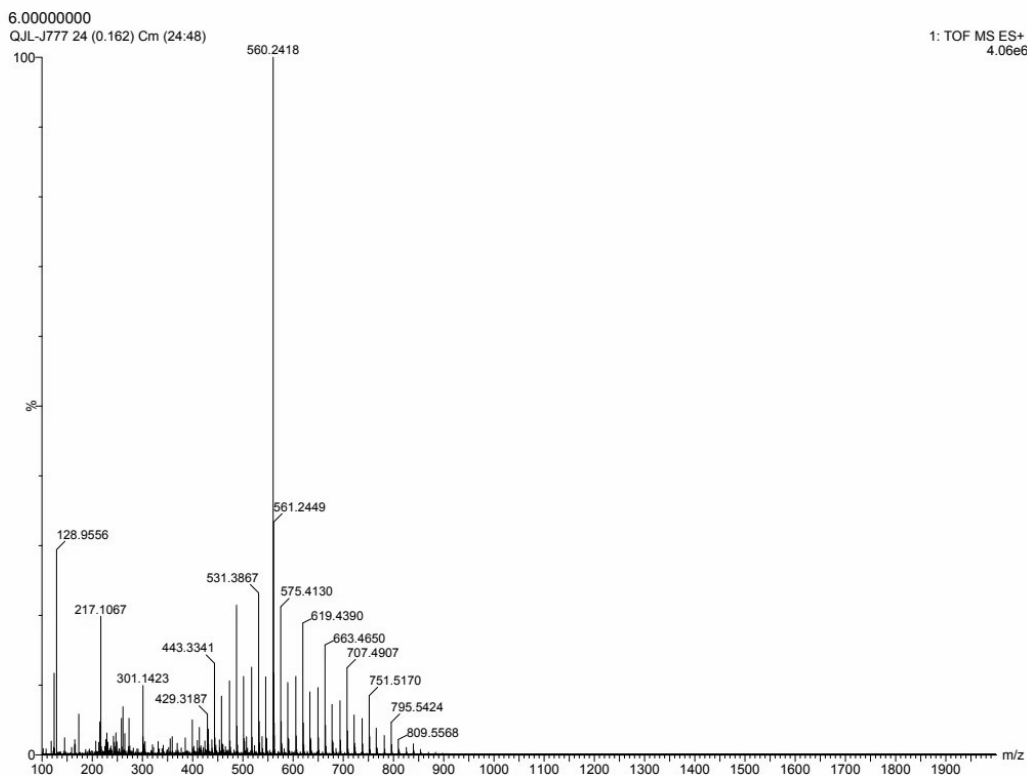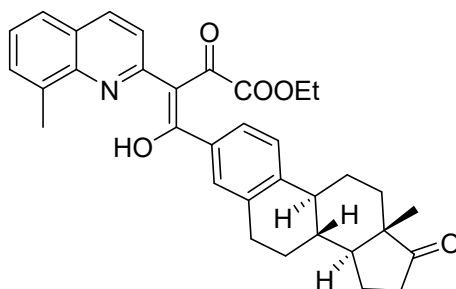

**51**

Chemical Formula:  $C_{35}H_{37}NO_5$

Exact Mass: 551.2672

Molecular Weight: 551.6830

m/z: 551.2672 (100.0%), 552.2705 (37.9%), 553.2739 (7.0%), 553.2714 (1.0%)

Elemental Analysis: C, 76.20; H, 6.76; N, 2.54; O, 14.50

HRMS (ESI, m/z) calcd for  $C_{34}H_{35}NO_5$   $[M+Na]^+$  560.2408, found 560.2418.

# 5m

J766-H.10.fid

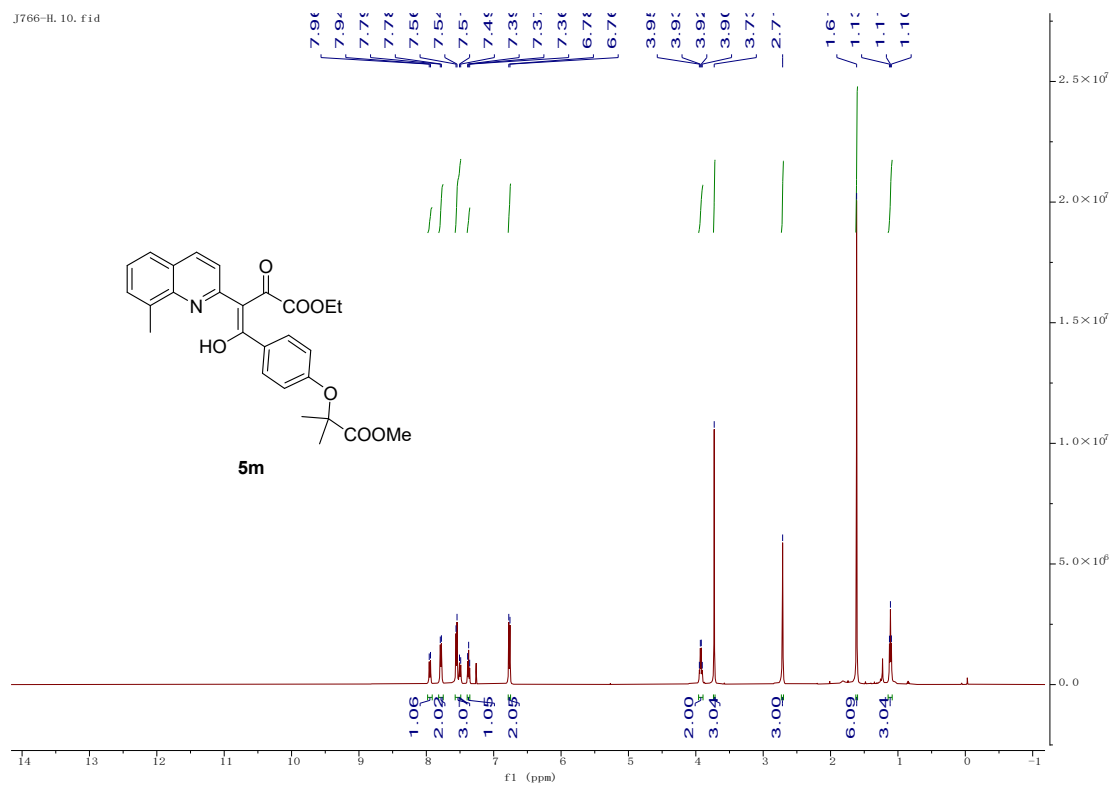

J766-C.10.fid

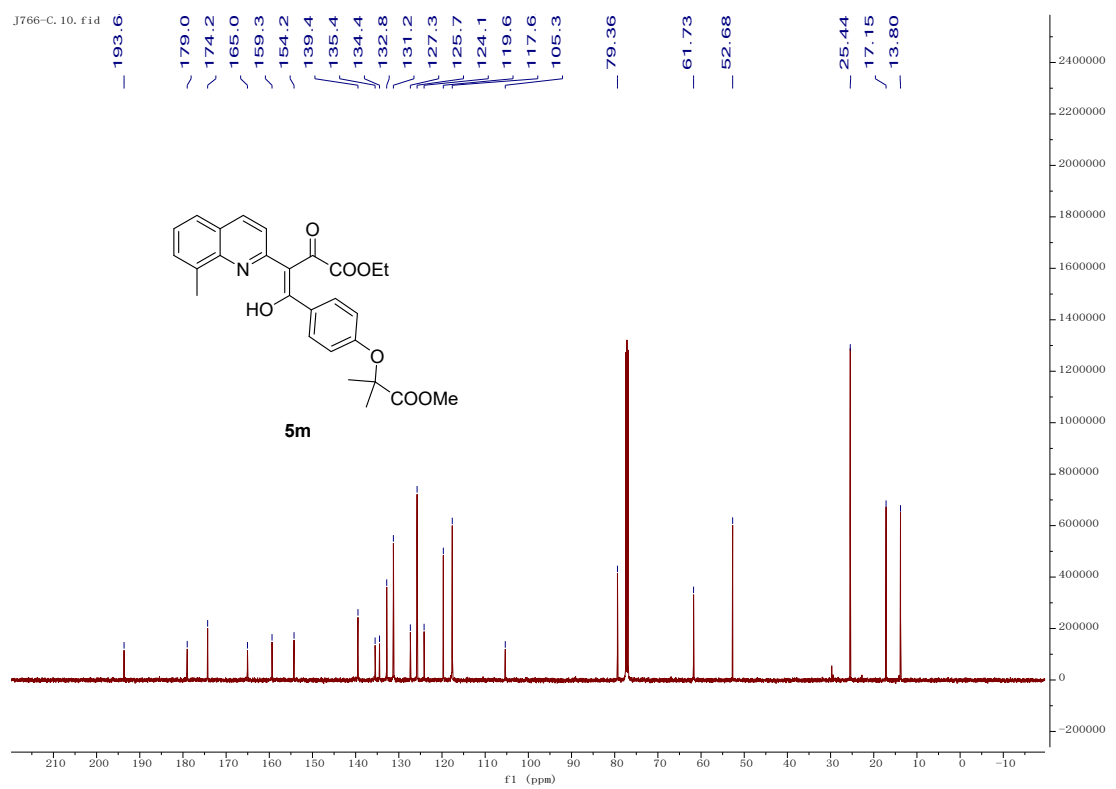

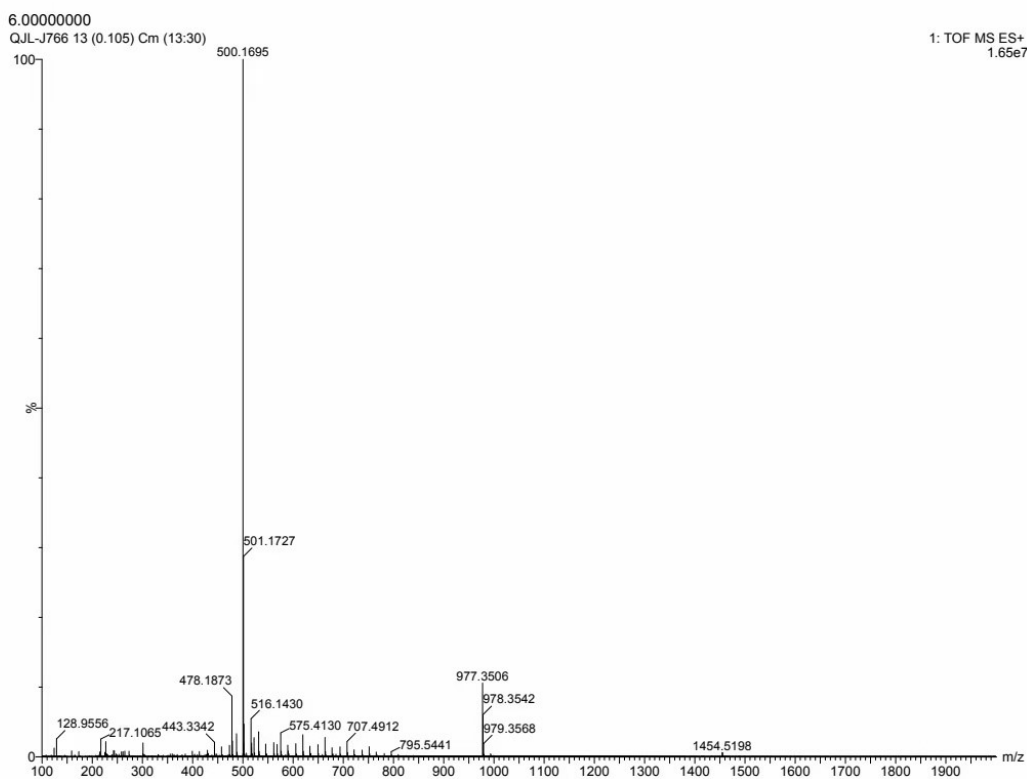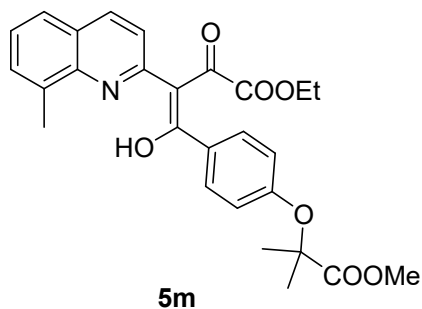

Chemical Formula:  $C_{27}H_{27}NO_7$

Exact Mass: 477.1788

Molecular Weight: 477.5130

m/z: 477.1788 (100.0%), 478.1821 (29.2%), 479.1855 (4.1%), 479.1830 (1.4%)

Elemental Analysis: C, 67.91; H, 5.70; N, 2.93; O, 23.45

HRMS (ESI, m/z) calcd for  $C_{27}H_{27}NO_7$   $[M+Na]^+$  500.1680, found 500.1695.

**5n**

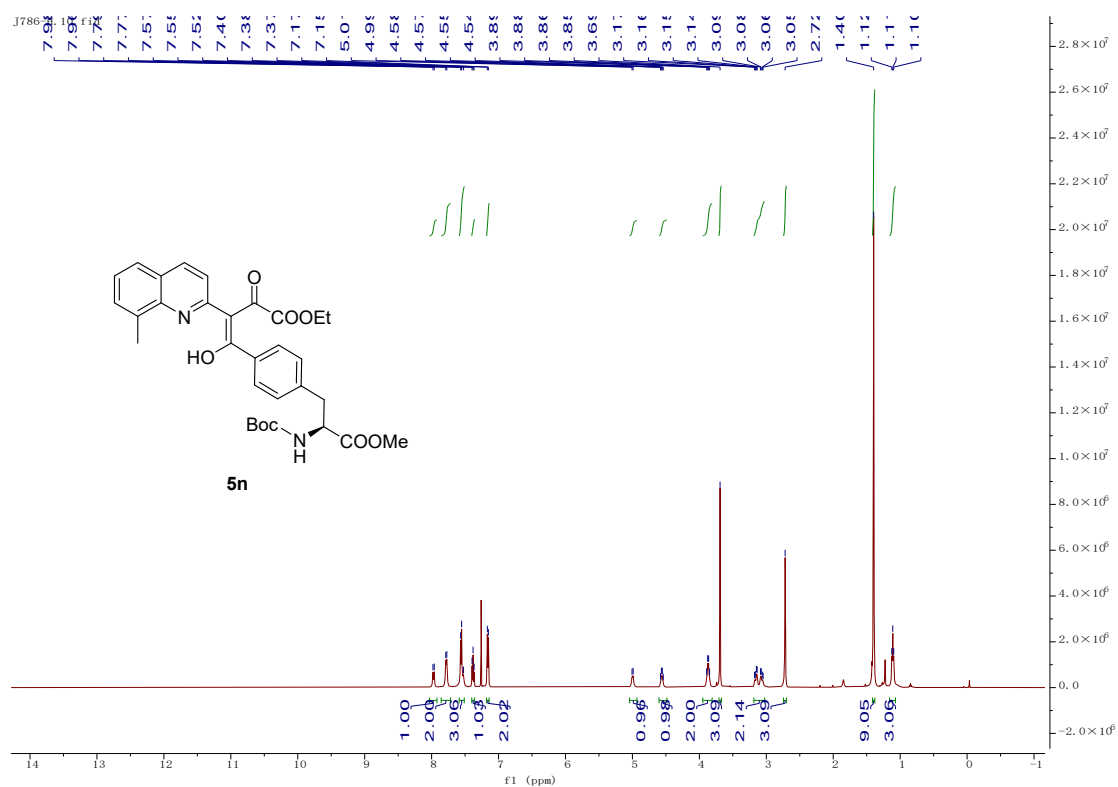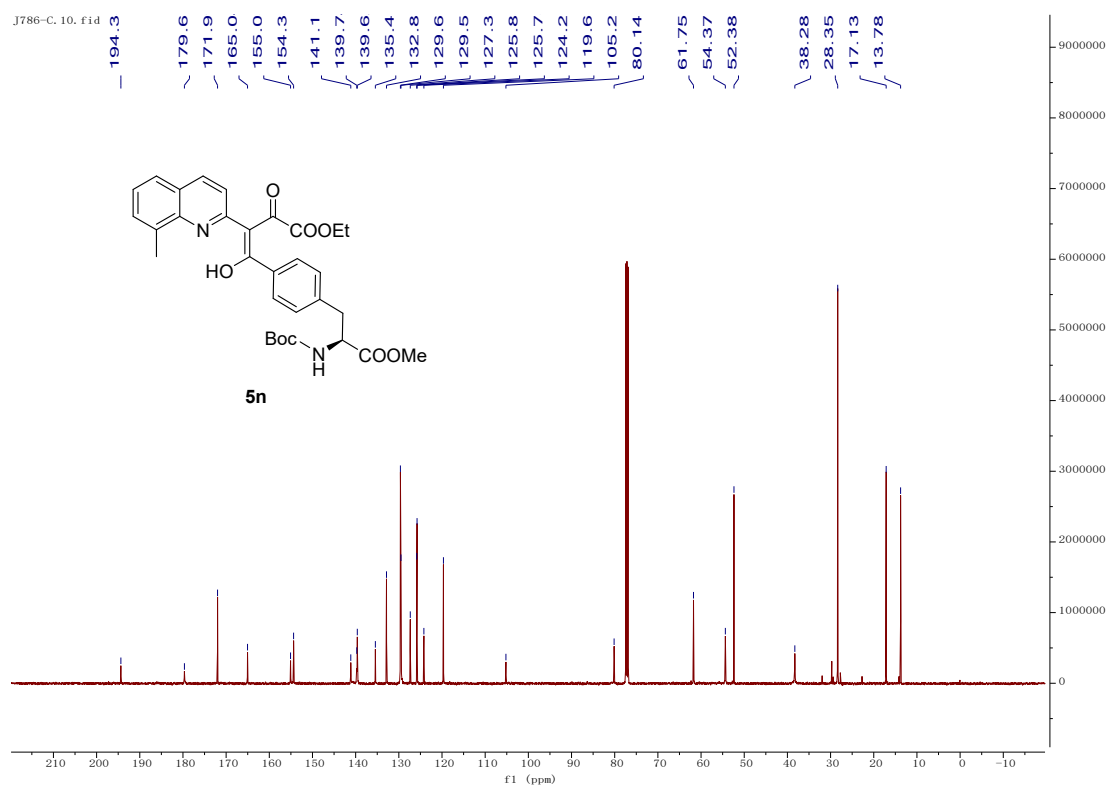

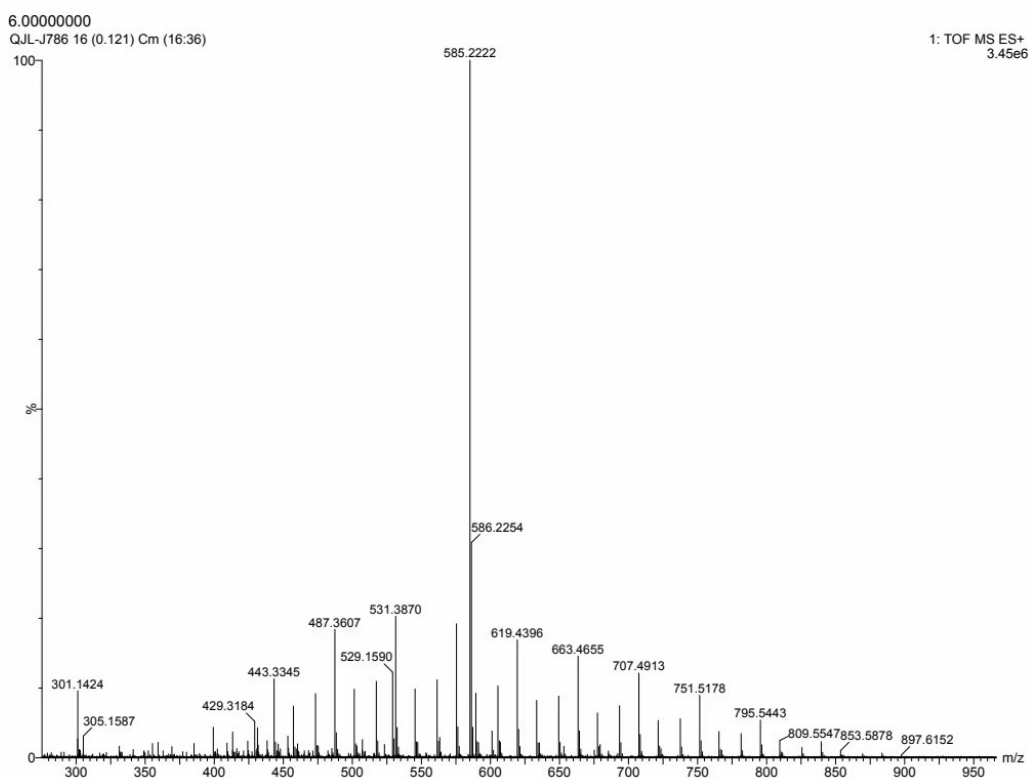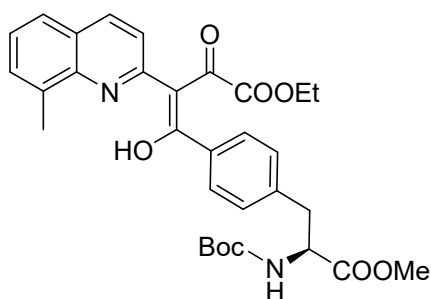

**5n**

Chemical Formula:  $C_{31}H_{34}N_2O_8$

Exact Mass: 562.2315

Molecular Weight: 562.6190

m/z: 562.2315 (100.0%), 563.2349 (33.5%), 564.2382 (5.4%), 564.2358 (1.6%)

Elemental Analysis: C, 66.18; H, 6.09; N, 4.98; O, 22.75

HRMS (ESI, m/z) calcd for  $C_{31}H_{34}N_2O_8$   $[M+Na]^+$  585.2208, found 585.2222.

5o

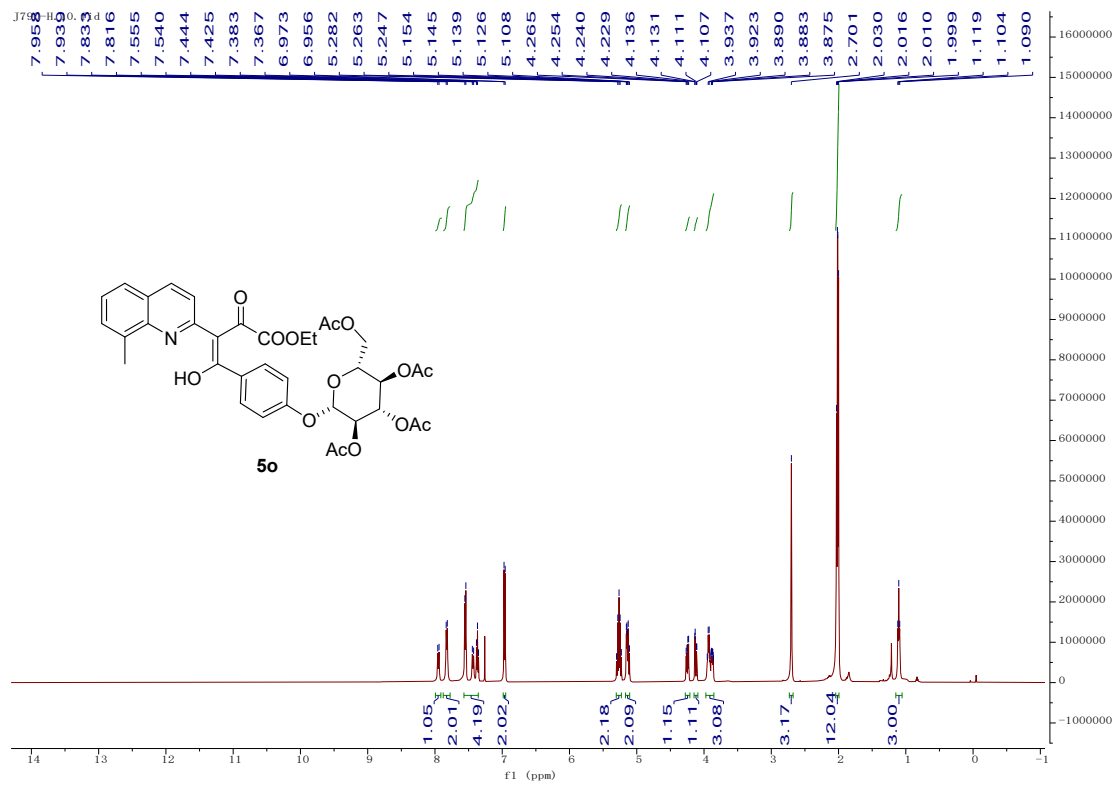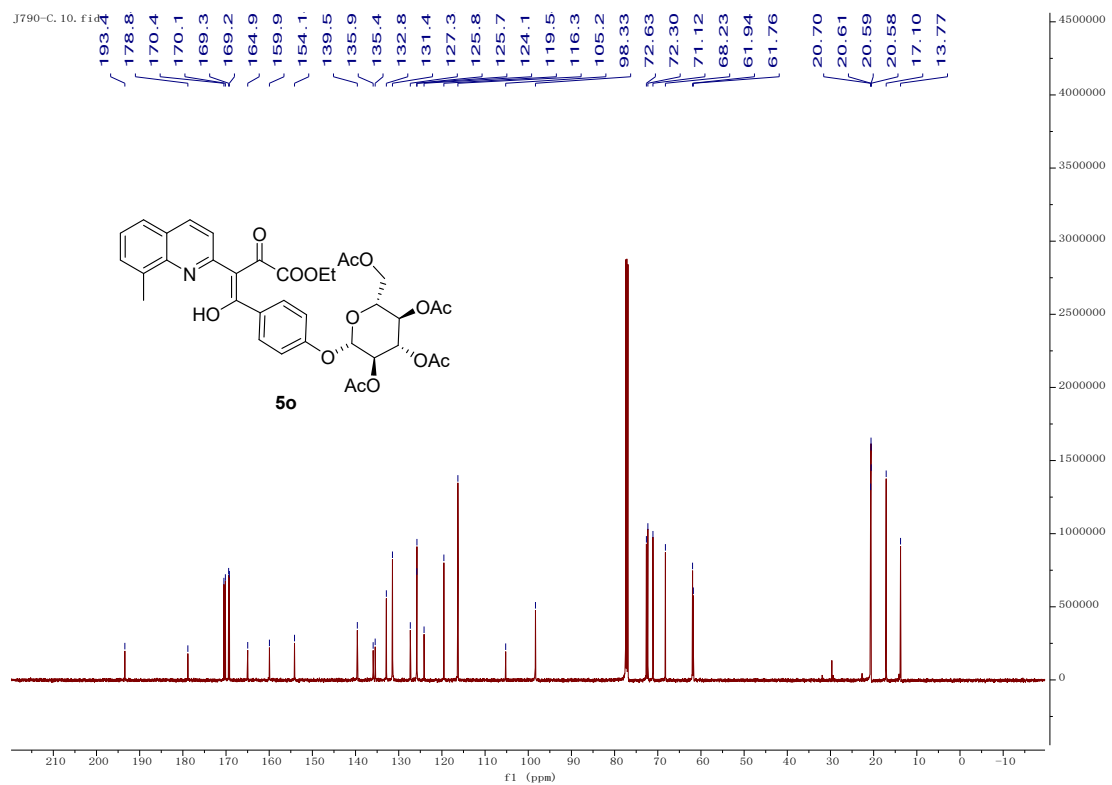

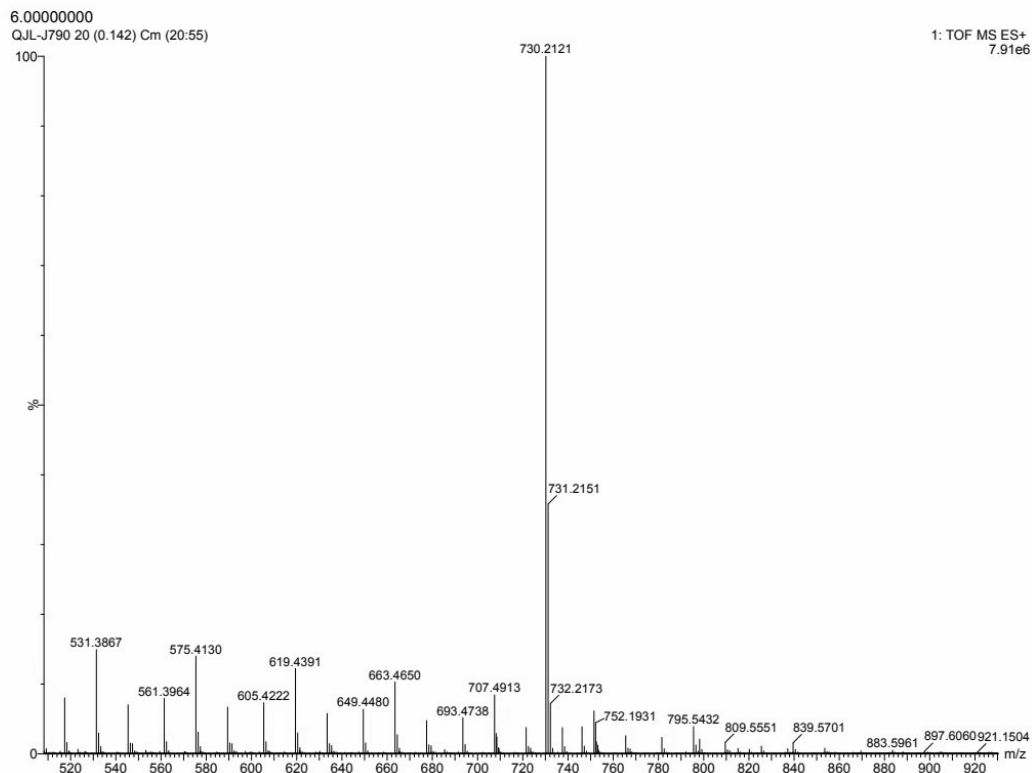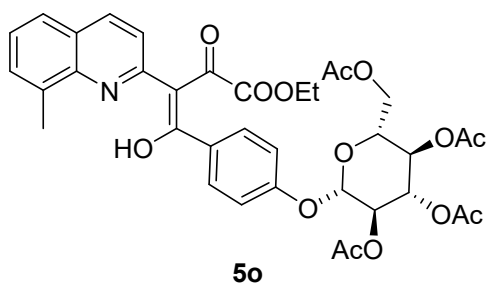

Chemical Formula:  $C_{36}H_{37}NO_{14}$

Exact Mass: 707.2214

Molecular Weight: 707.6850

m/z: 707.2214 (100.0%), 708.2248 (38.9%), 709.2281 (7.4%), 709.2257 (2.9%), 710.2290 (1.1%)

Elemental Analysis: C, 61.10; H, 5.27; N, 1.98; O, 31.65

HRMS (ESI, m/z) calcd for  $C_{36}H_{37}NO_{14}$   $[M+Na]^+$  730.2107, found 730.2121.

**5p**

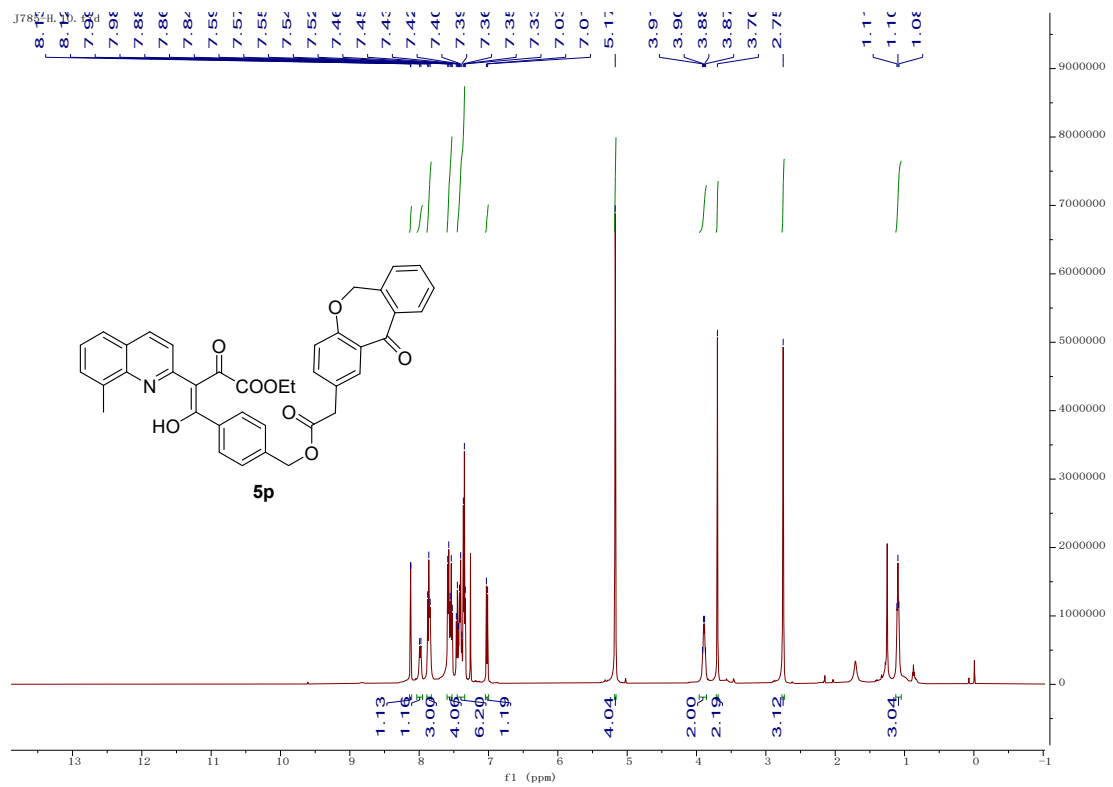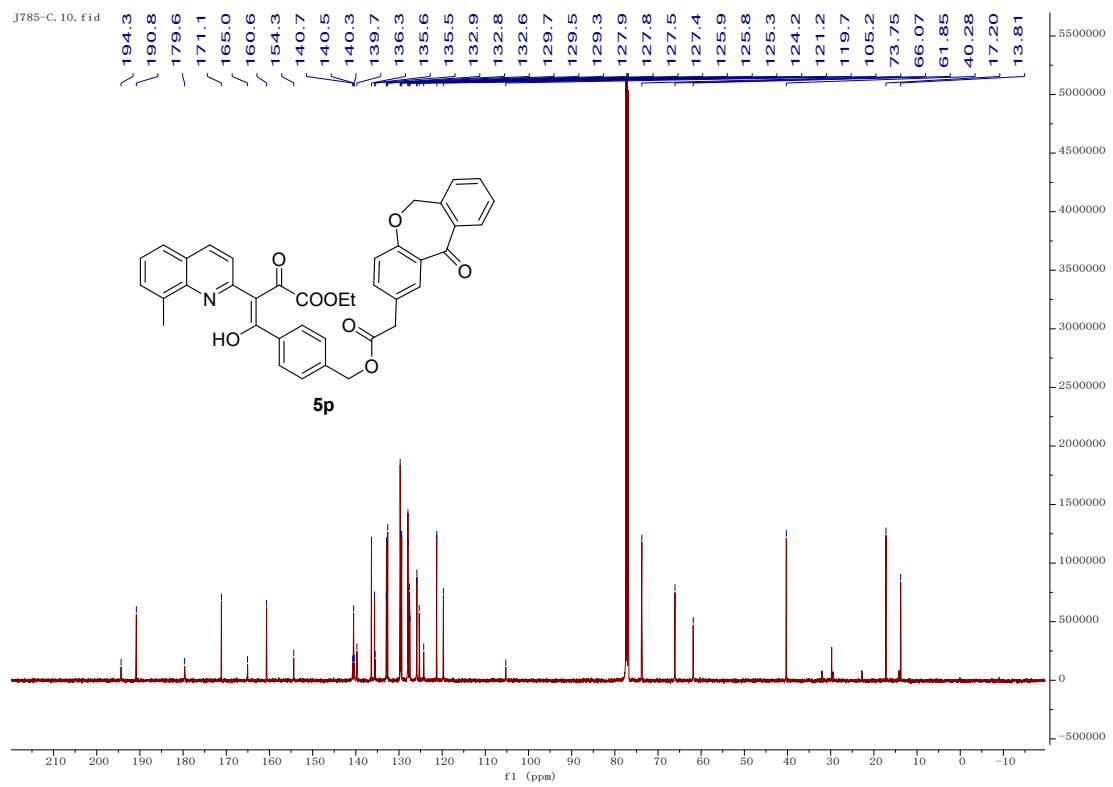

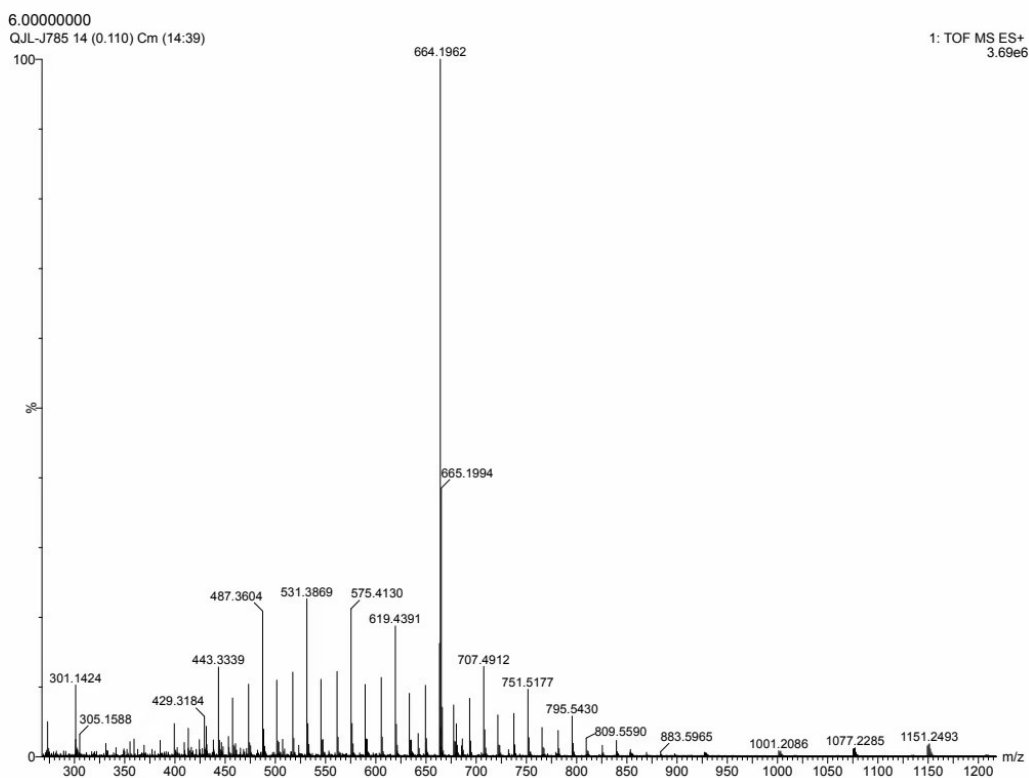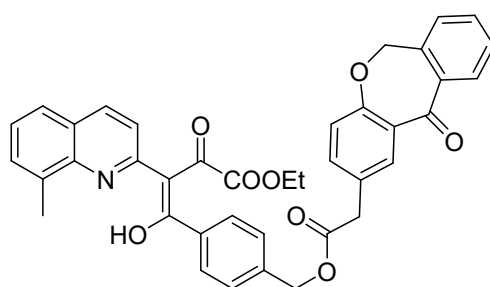

**5p**

Chemical Formula:  $C_{39}H_{31}NO_8$

Exact Mass: 641.2050

Molecular Weight: 641.6760

m/z: 641.2050 (100.0%), 642.2083 (42.2%), 643.2117 (8.7%), 643.2092 (1.6%), 644.2150 (1.2%)

Elemental Analysis: C, 73.00; H, 4.87; N, 2.18; O, 19.95

HRMS (ESI, m/z) calcd for  $C_{39}H_{31}NO_8$   $[M+Na]^+$  664.1942, found 664.1962.

6

J808-2-H.10.fid

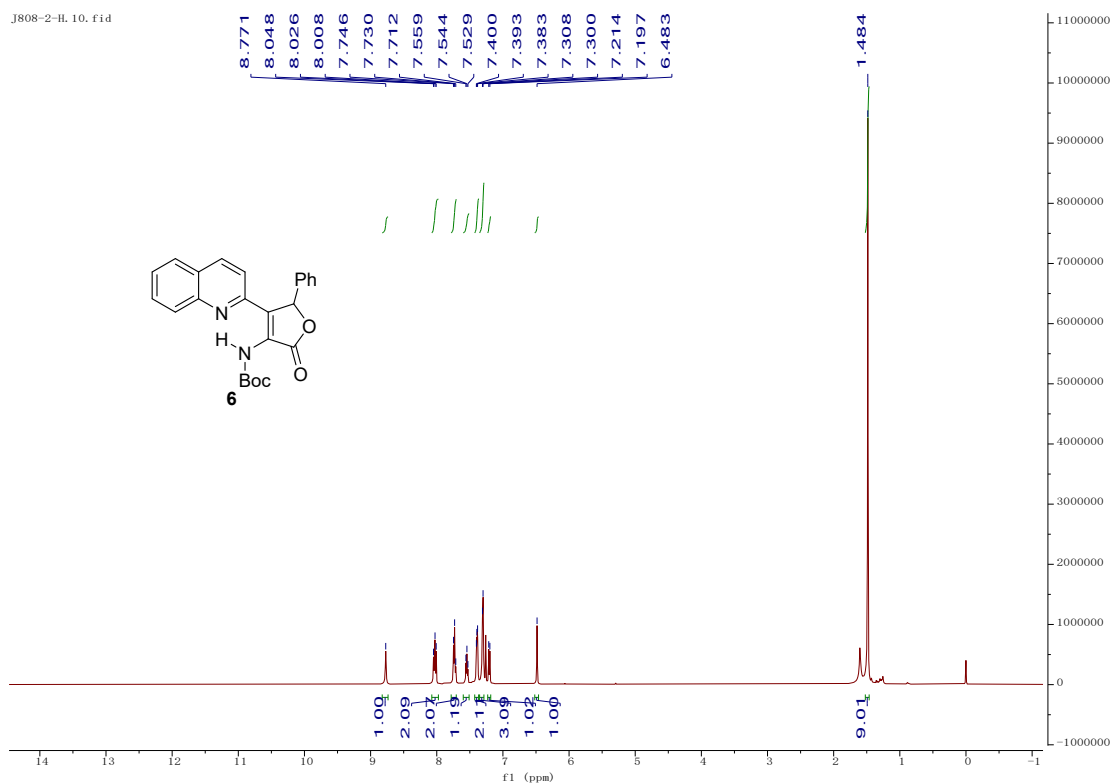

J808-2-C.10.fid

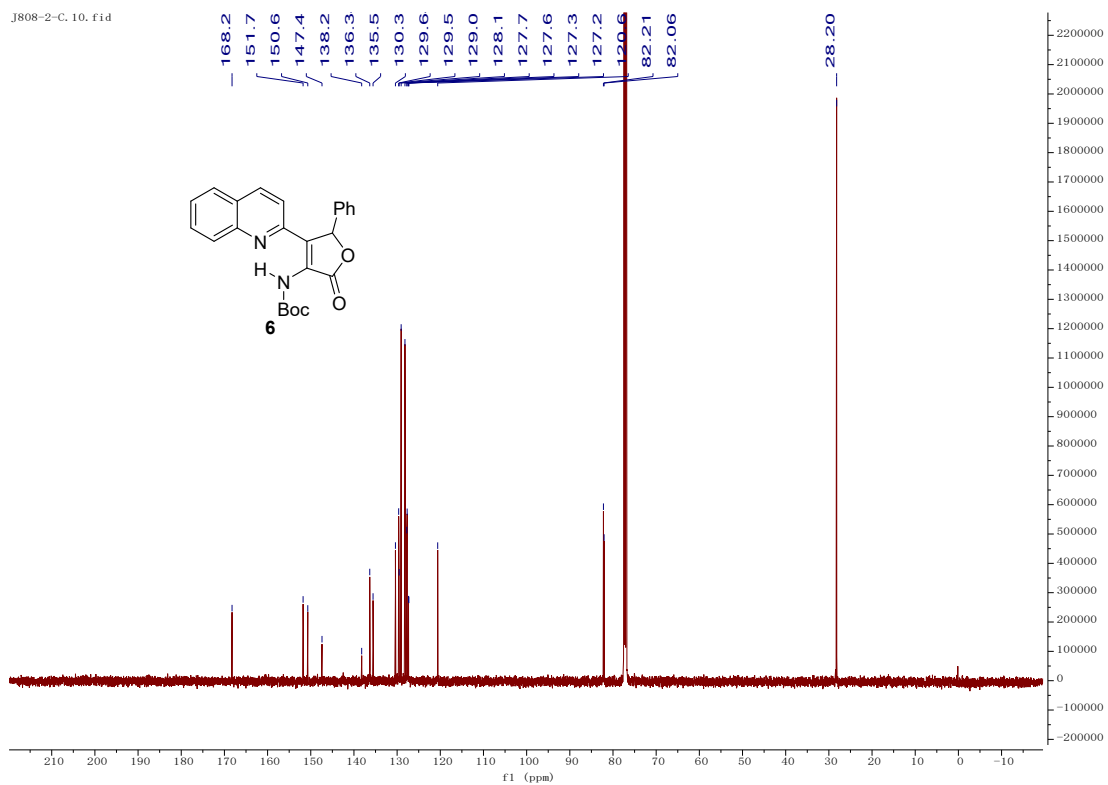

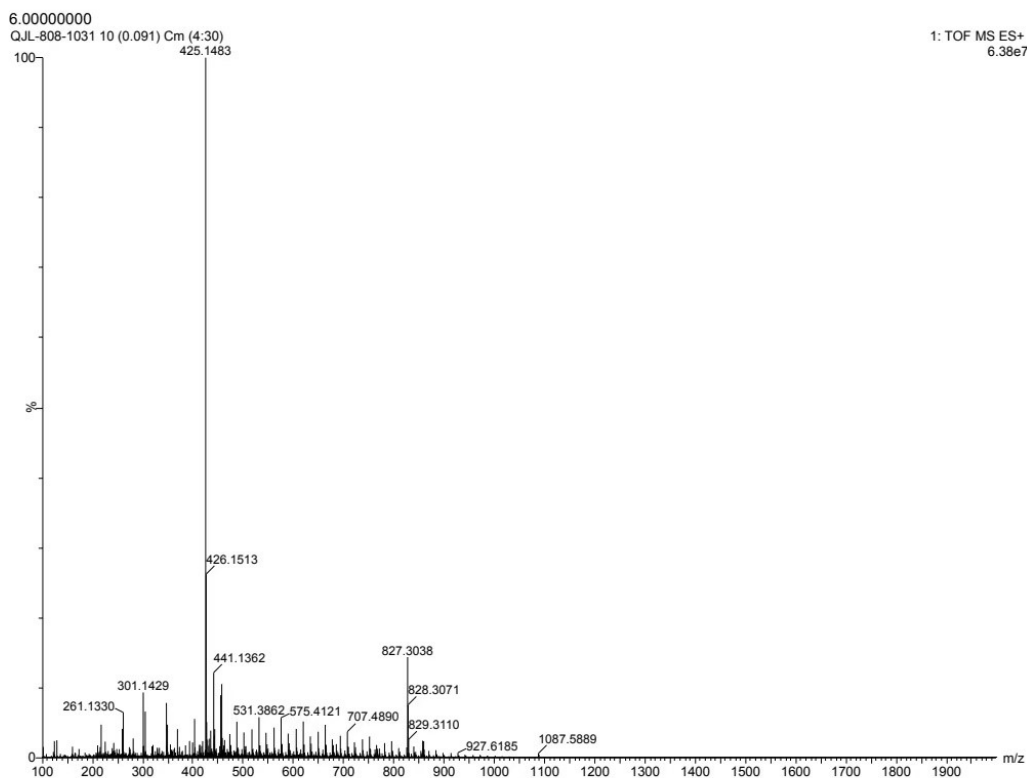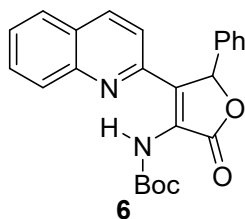

Chemical Formula:  $C_{24}H_{22}N_2O_4$

Exact Mass: 402.1580

Molecular Weight: 402.4500

m/z: 402.1580 (100.0%), 403.1613 (26.0%), 404.1647 (3.2%)

Elemental Analysis: C, 71.63; H, 5.51; N, 6.96; O, 15.90

HRMS (ESI, m/z) calcd for  $C_{24}H_{22}N_2O_4$   $[M+Na]^+$  425.1472, found 425.1483.

7

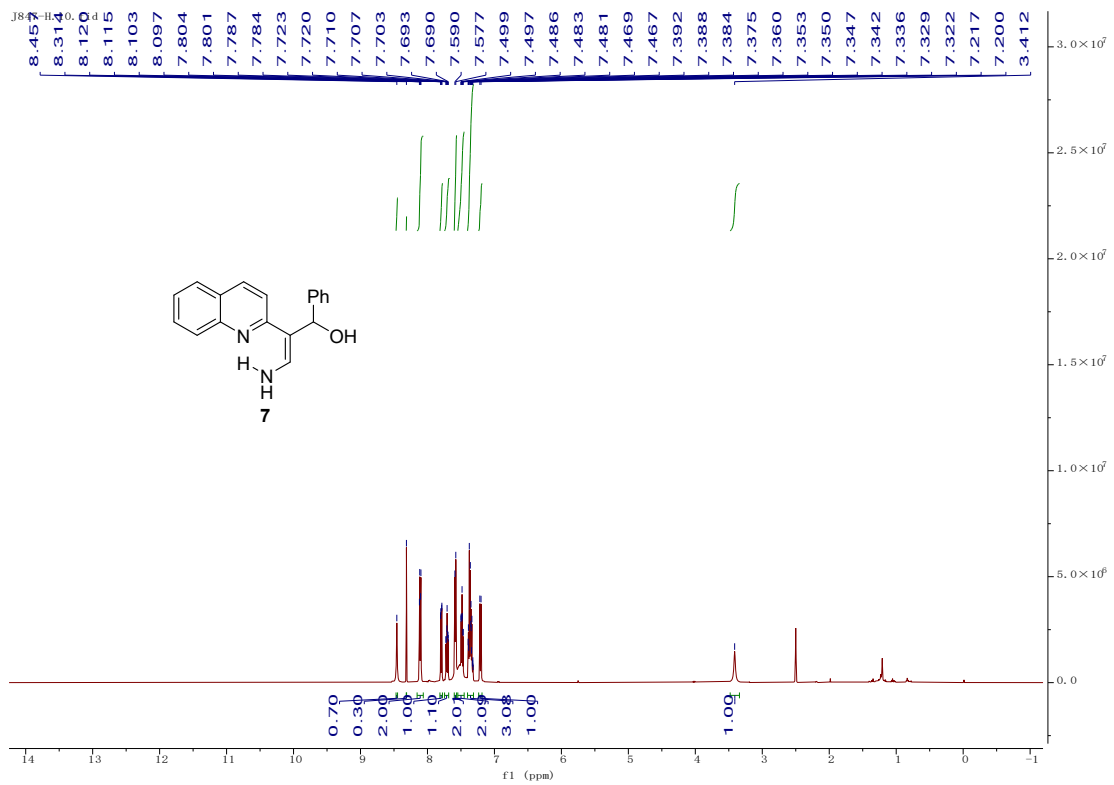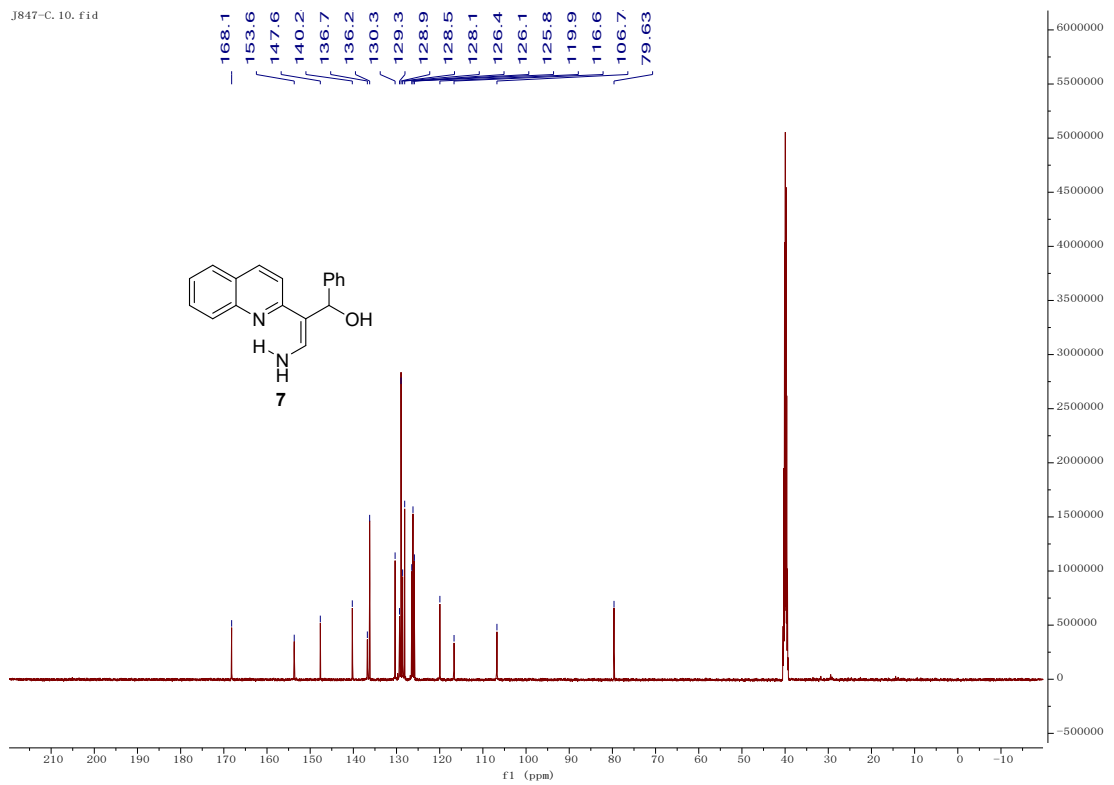

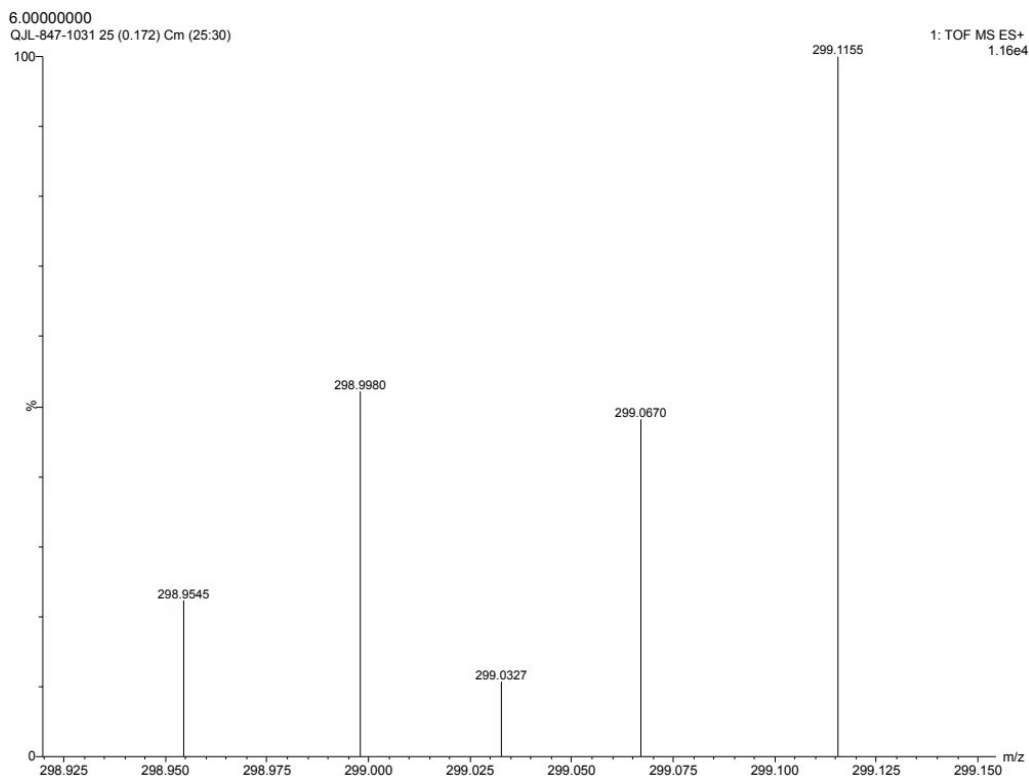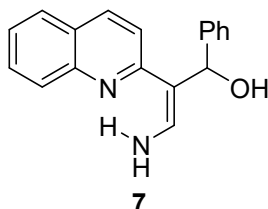

Chemical Formula:  $C_{18}H_{16}N_2O$

Exact Mass: 276.1263

Molecular Weight: 276.3390

m/z: 276.1263 (100.0%), 277.1296 (19.5%), 278.1330 (1.8%)

Elemental Analysis: C, 78.24; H, 5.84; N, 10.14; O, 5.79

HRMS (ESI, m/z) calcd for  $C_{18}H_{16}N_2O$   $[M+Na]^+$  299.1155, found 299.1155.

# 8a

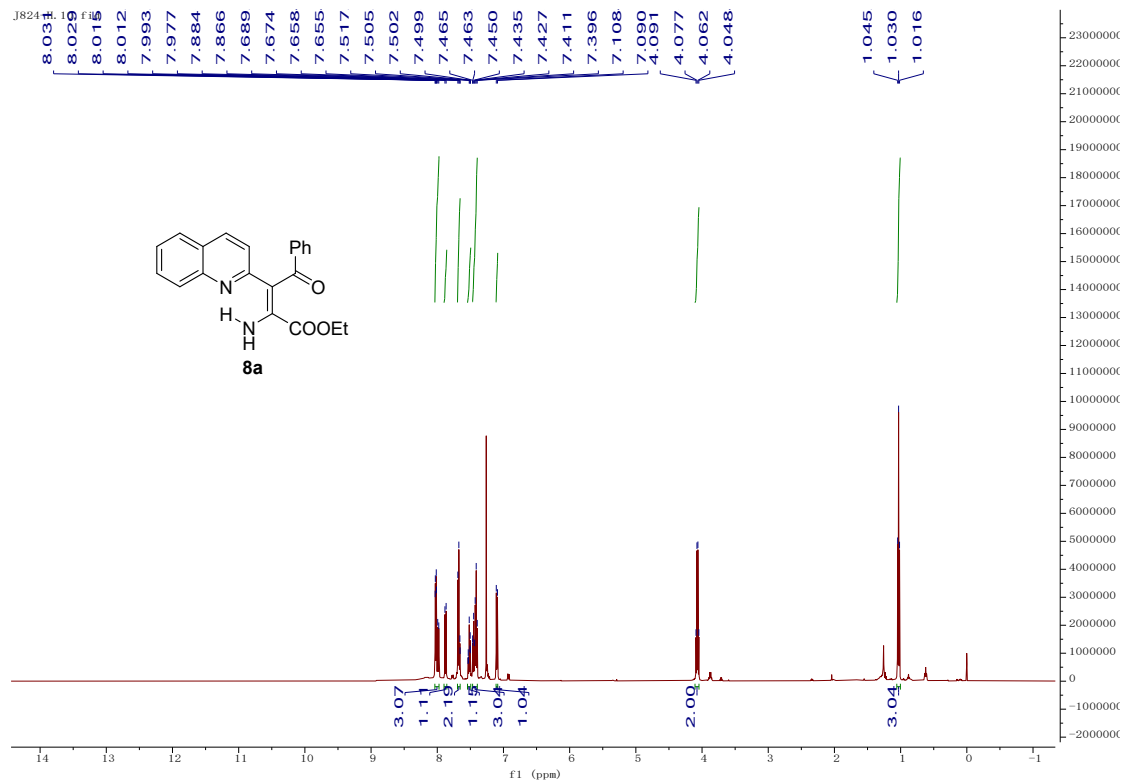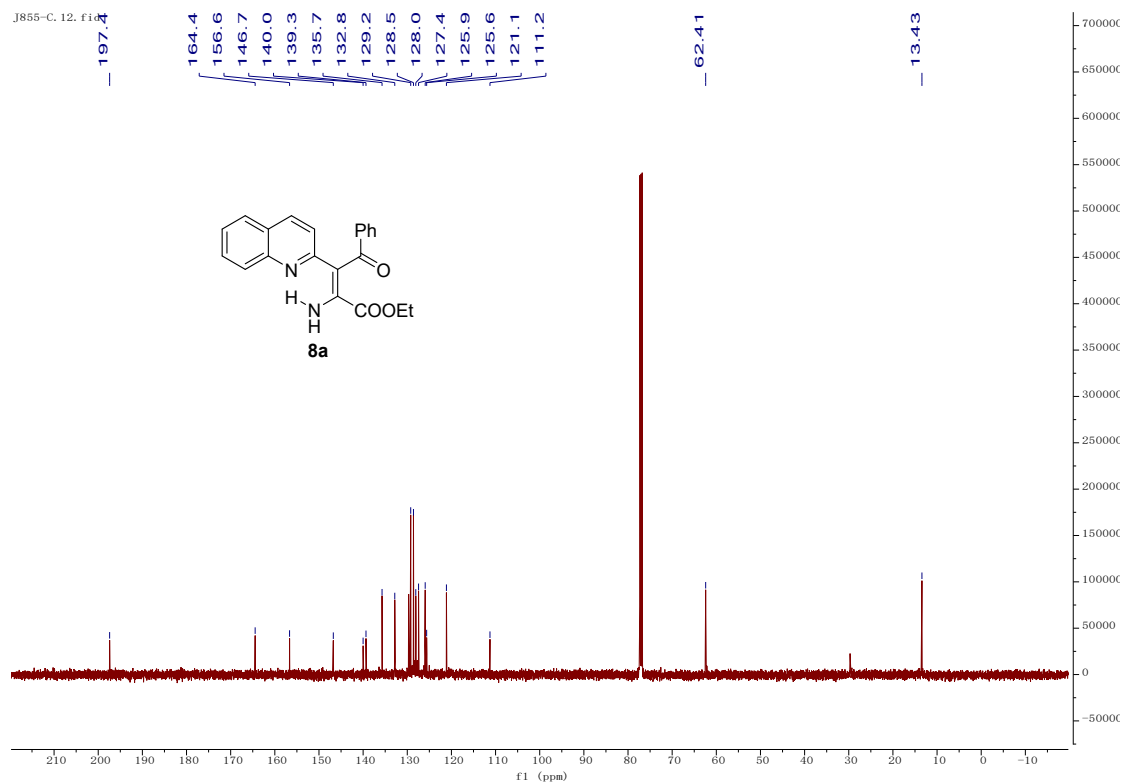

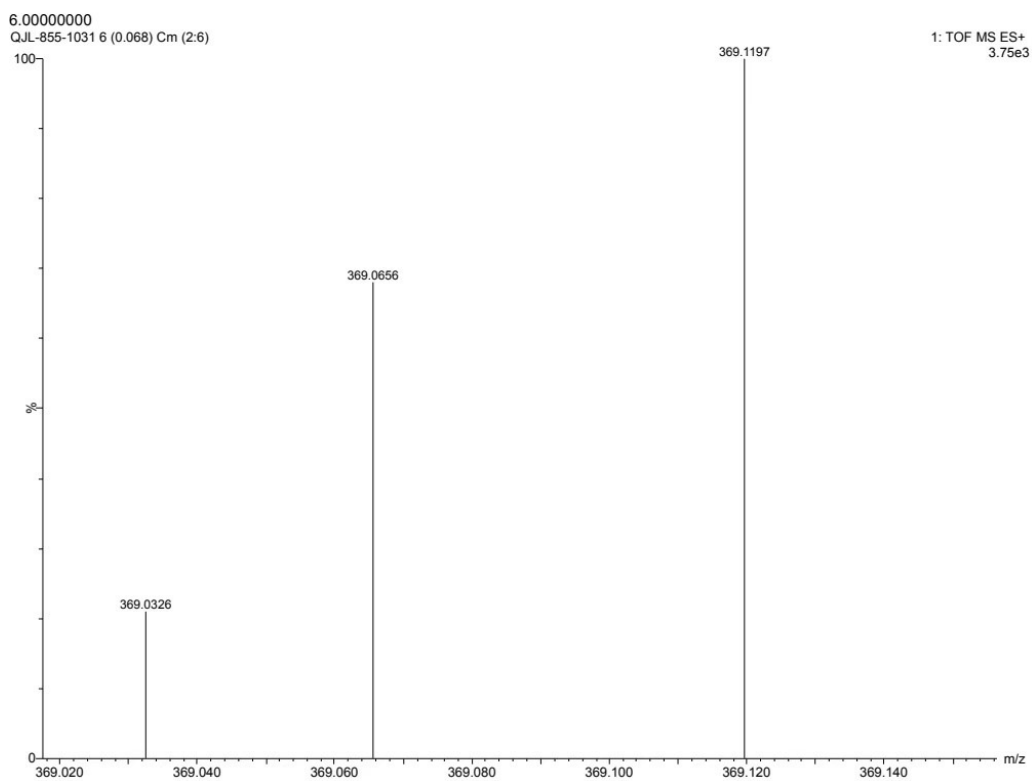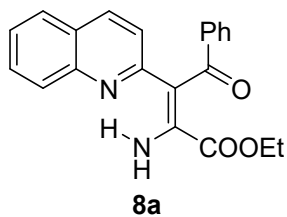

Chemical Formula:  $C_{21}H_{18}N_2O_3$

Exact Mass: 346.1317

Molecular Weight: 346.3860

m/z: 346.1317 (100.0%), 347.1351 (22.7%), 348.1385 (2.5%)

Elemental Analysis: C, 72.82; H, 5.24; N, 8.09; O, 13.86

HRMS (ESI, m/z) calcd for  $C_{21}H_{18}N_2O_3$   $[M+Na]^+$  369.1210, found 369.1197.

9

J807-2.10.fid

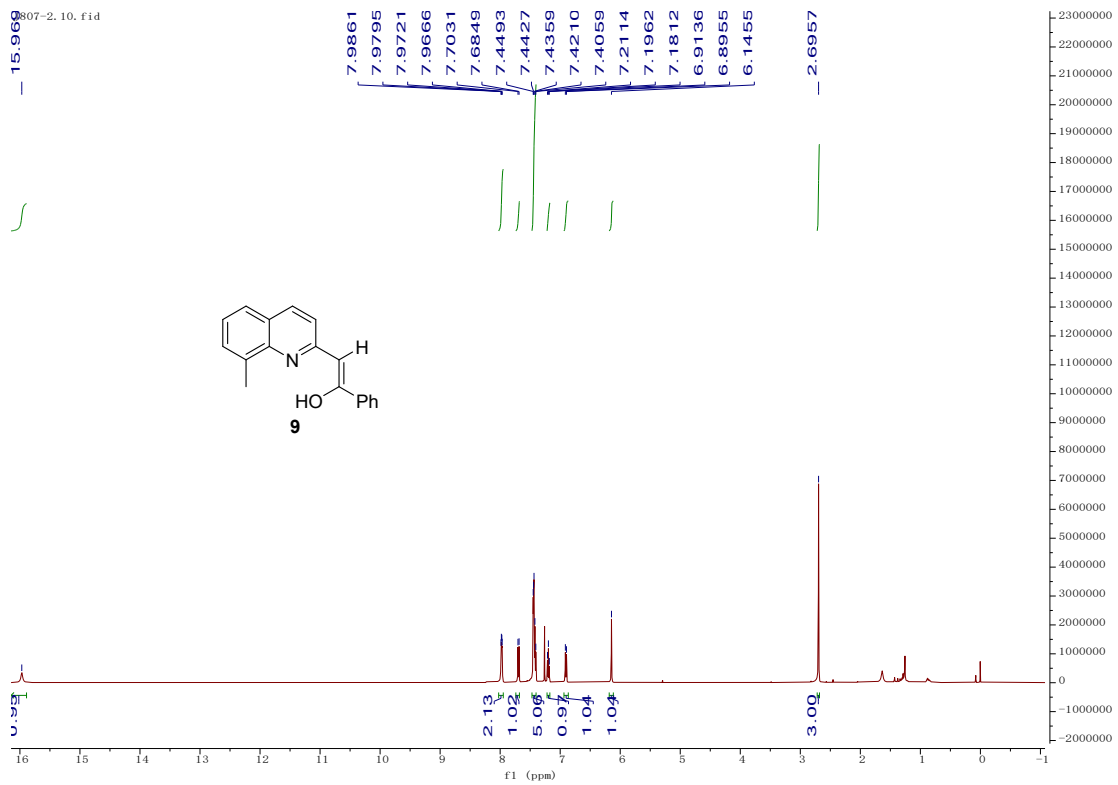

J807-2-C.10.fid

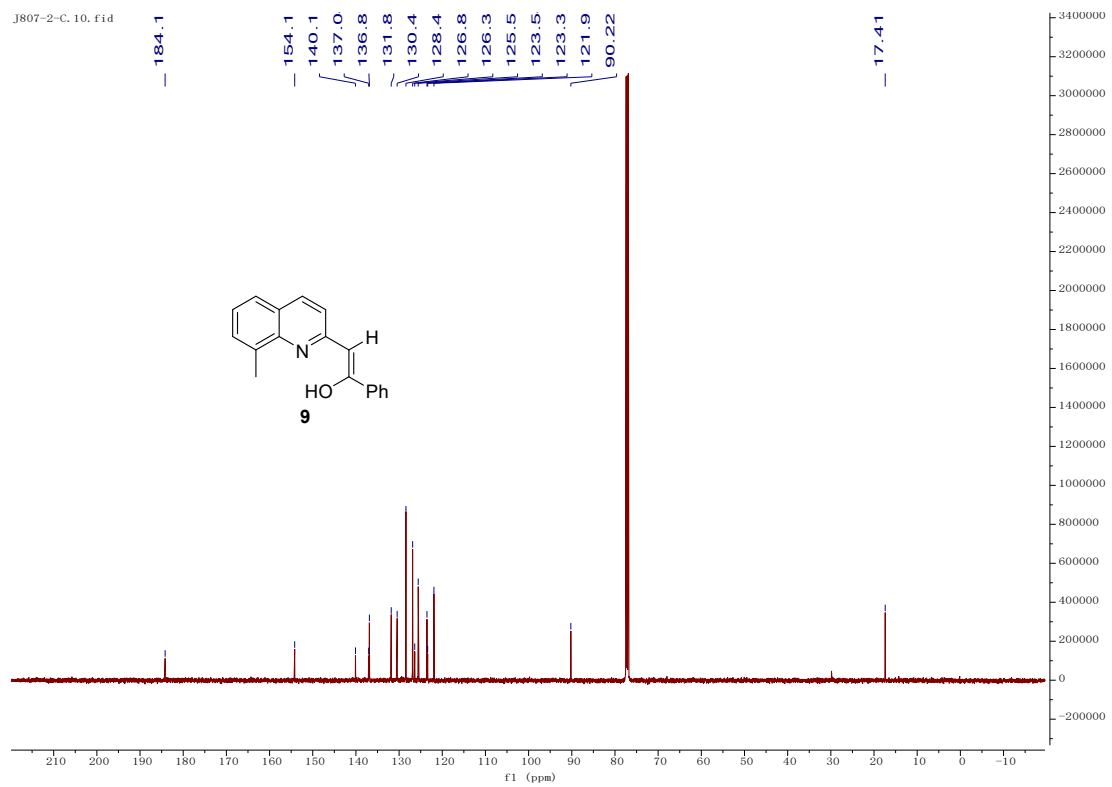

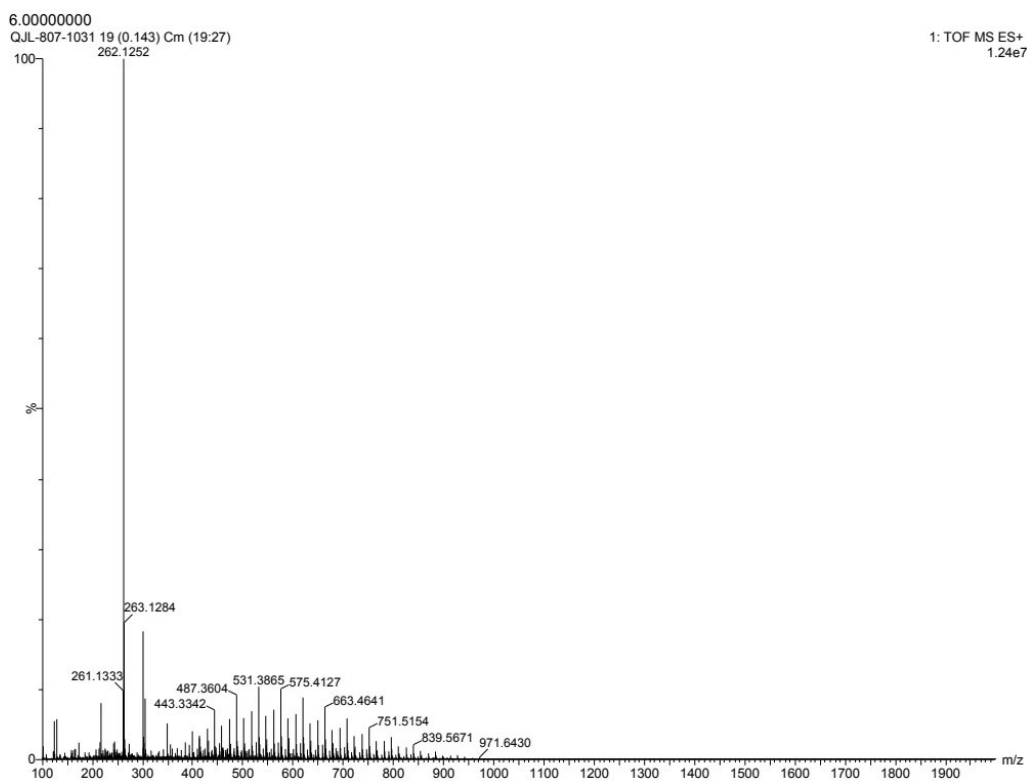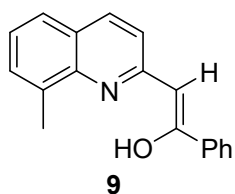

Chemical Formula:  $C_{18}H_{15}NO$

Exact Mass: 261.1154

Molecular Weight: 261.3240

m/z: 261.1154 (100.0%), 262.1187 (19.5%), 263.1221 (1.8%)

Elemental Analysis: C, 82.73; H, 5.79; N, 5.36; O, 6.12

HRMS (ESI, m/z) calcd for  $C_{18}H_{15}NO$   $[M+H]^+$  262.1227, found 262.1252.

# 10a

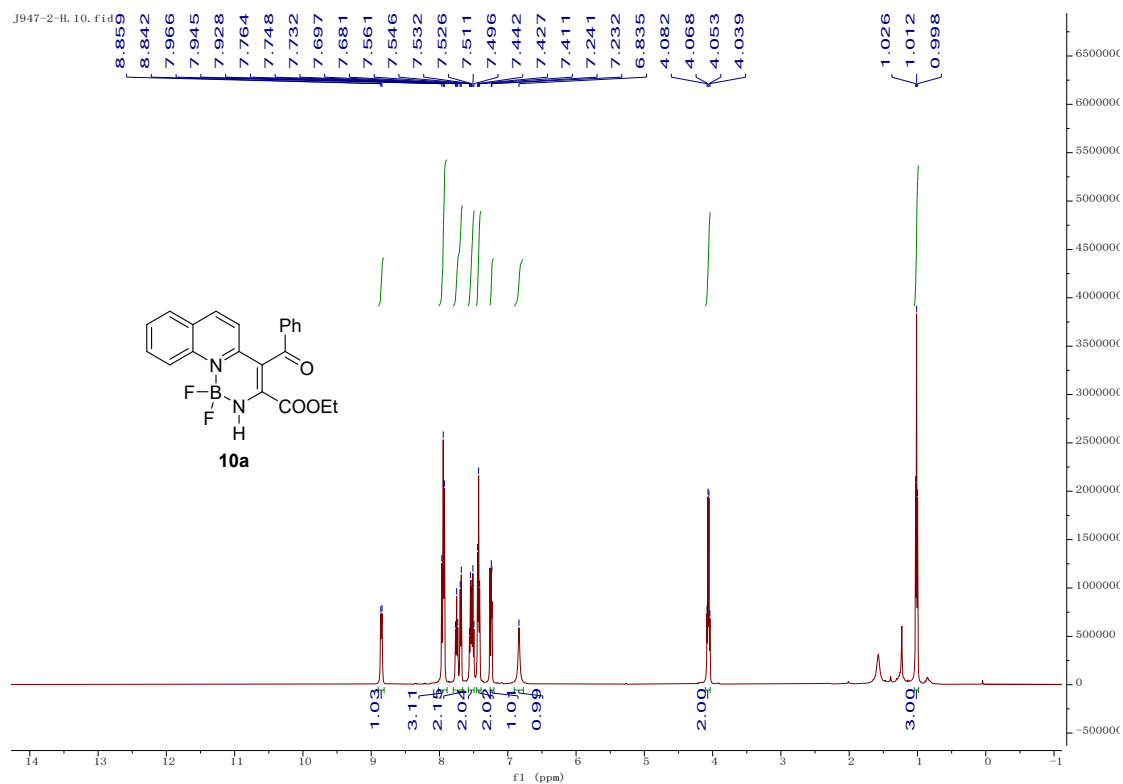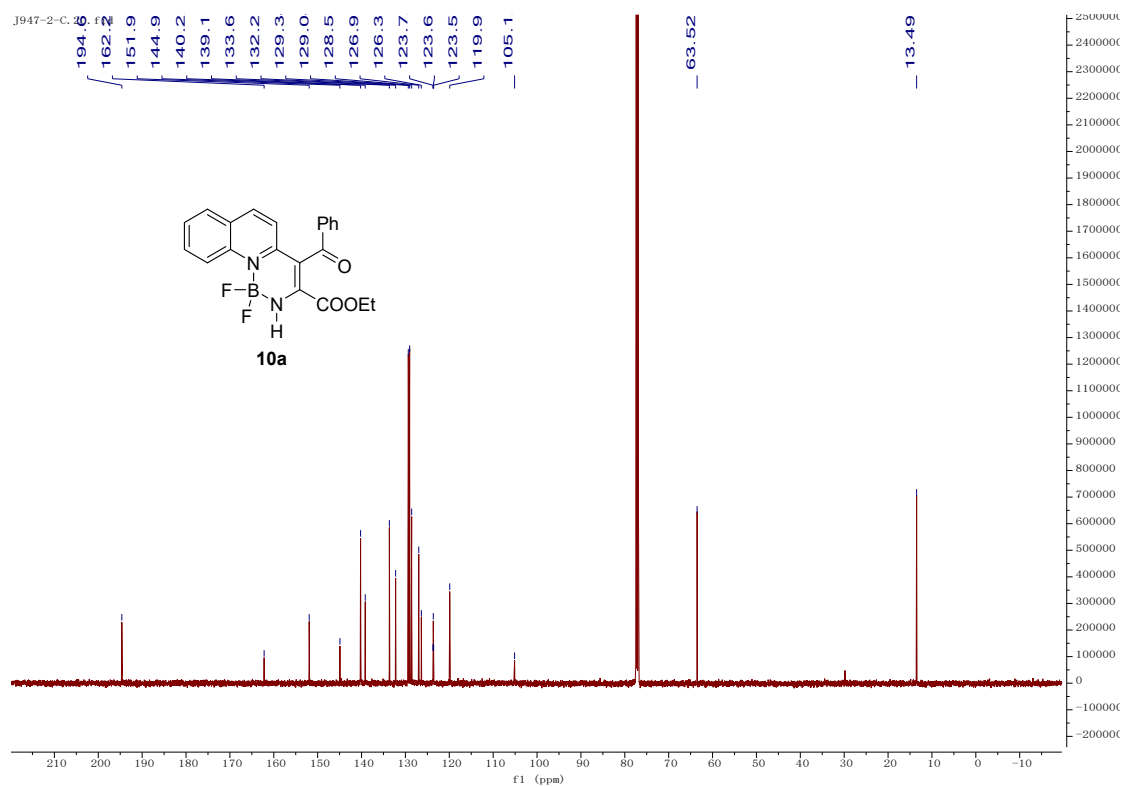

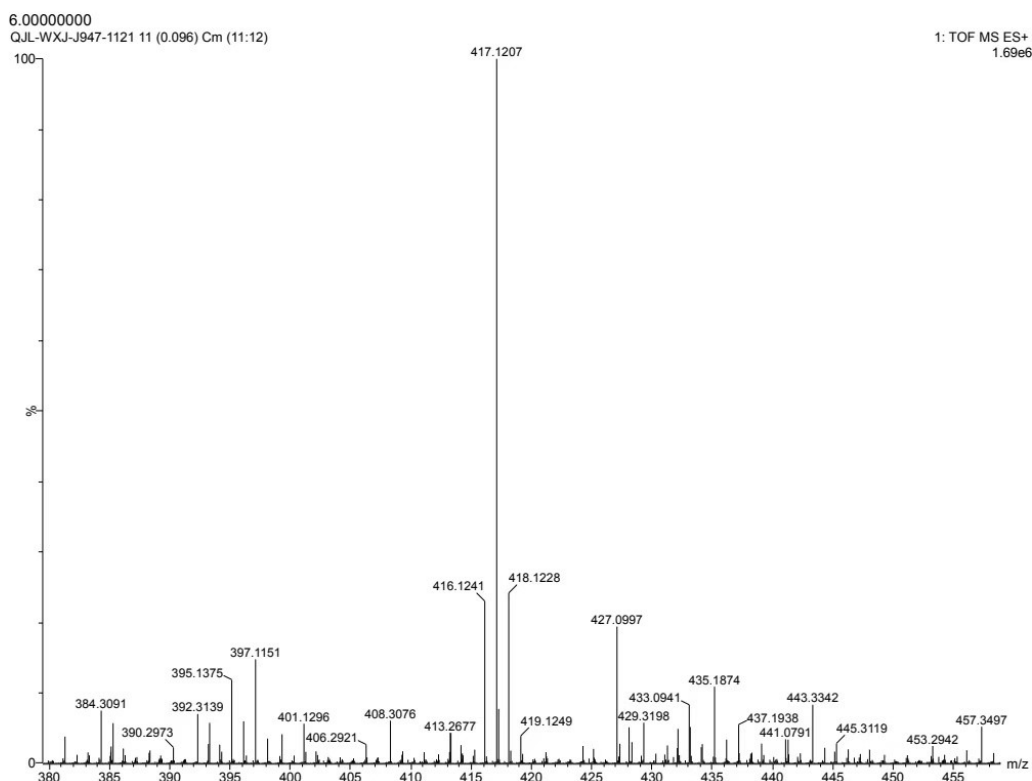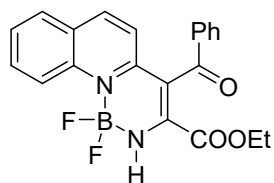

**10a**

Chemical Formula:  $C_{21}H_{17}BF_2N_2O_3$

Exact Mass: 394.1300

Molecular Weight: 394.1848

m/z: 394.1300 (100.0%), 393.1337 (24.8%), 395.1334 (22.7%), 394.1370 (5.6%), 396.1367 (2.5%)

Elemental Analysis: C, 63.99; H, 4.35; B, 2.74; F, 9.64; N, 7.11; O, 12.18

HRMS (ESI, m/z) calcd for  $C_{21}H_{17}BF_2N_2O_3$   $[M+Na]^+$  417.1193, found 417.1207.

**10b**

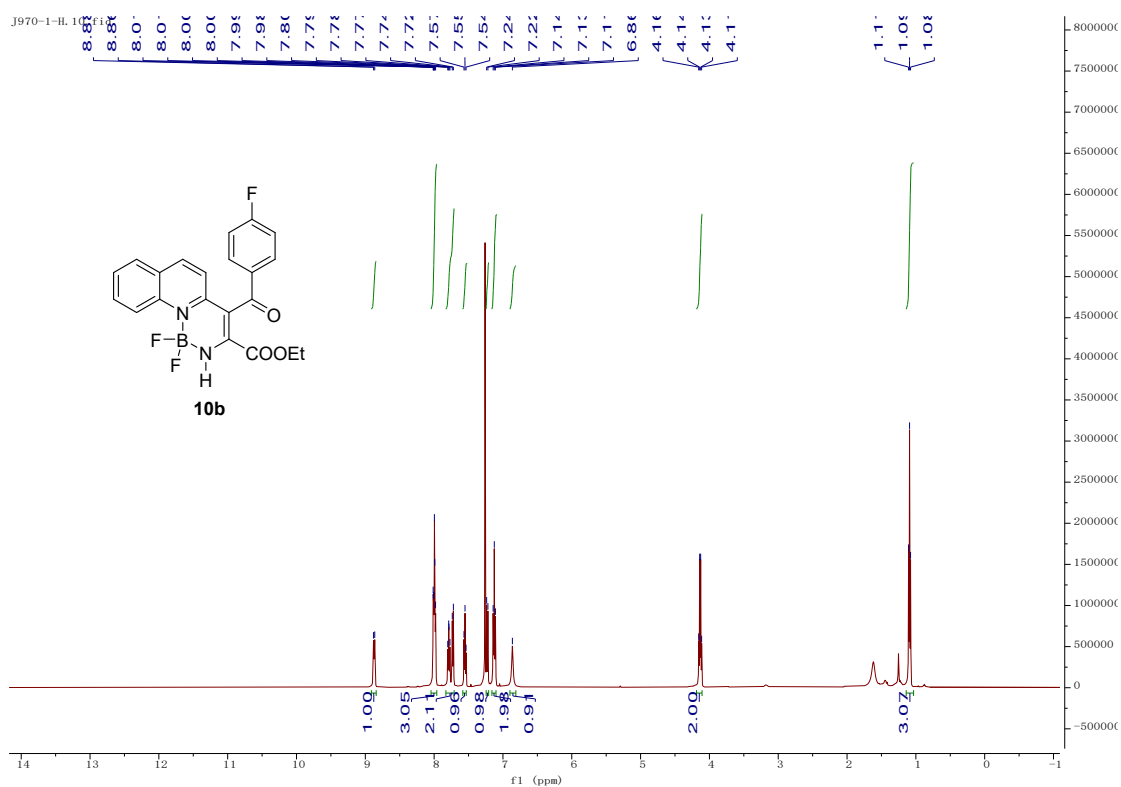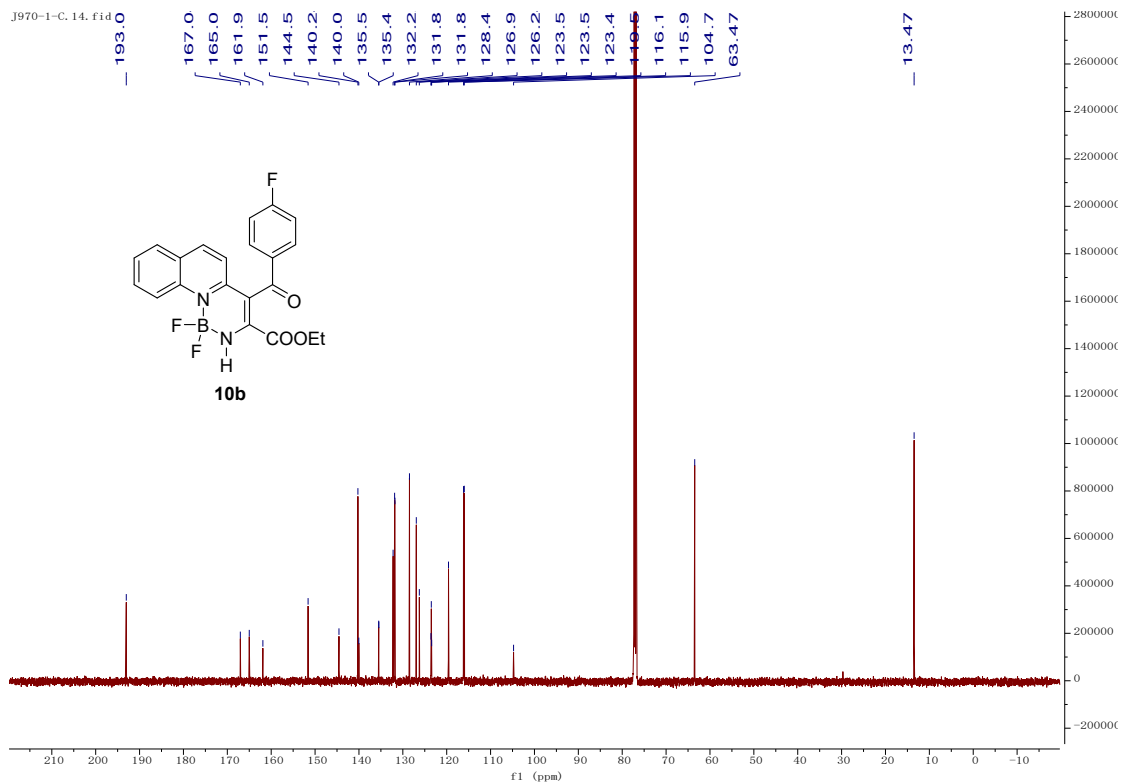

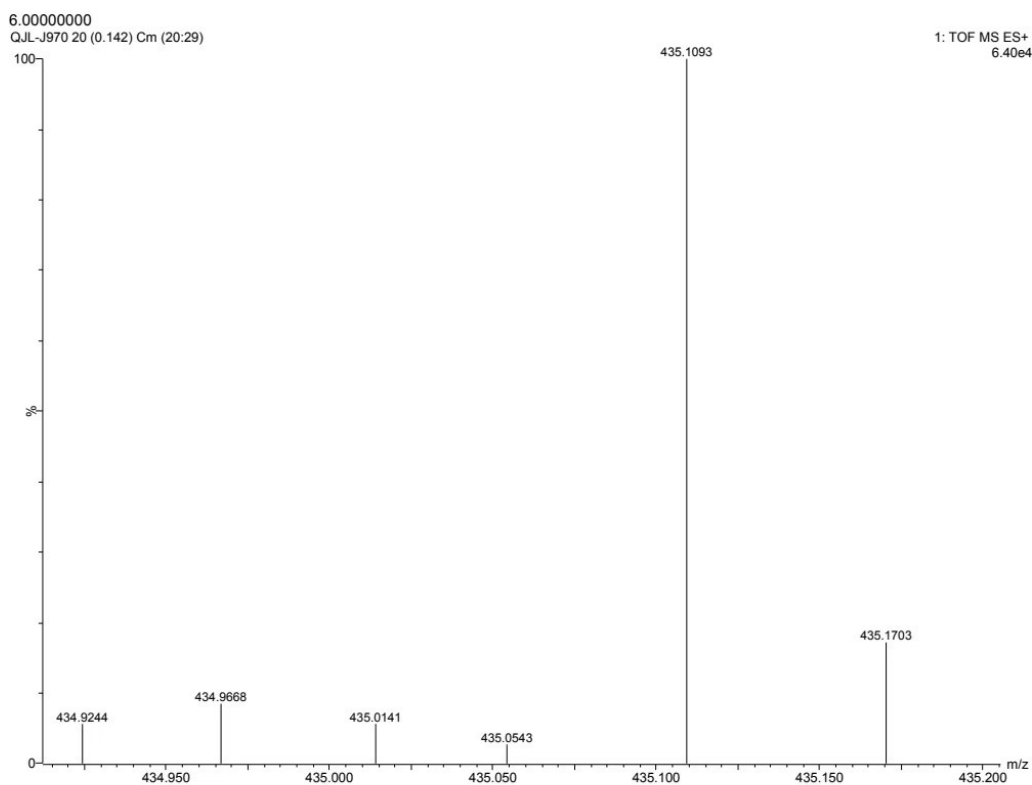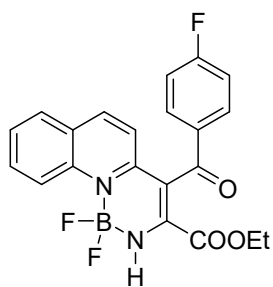

**10b**

Chemical Formula:  $C_{21}H_{16}BF_3N_2O_3$

Exact Mass: 412.1206

Molecular Weight: 412.1752

m/z: 412.1206 (100.0%), 411.1242 (24.8%), 413.1240 (22.7%), 412.1276 (5.6%), 414.1273 (2.5%)

Elemental Analysis: C, 61.20; H, 3.91; B, 2.62; F, 13.83; N, 6.80; O, 11.64

HRMS (ESI, m/z) calcd for  $C_{21}H_{16}BF_3N_2O_3$   $[M+Na]^+$  435.1099, found 435.1093.



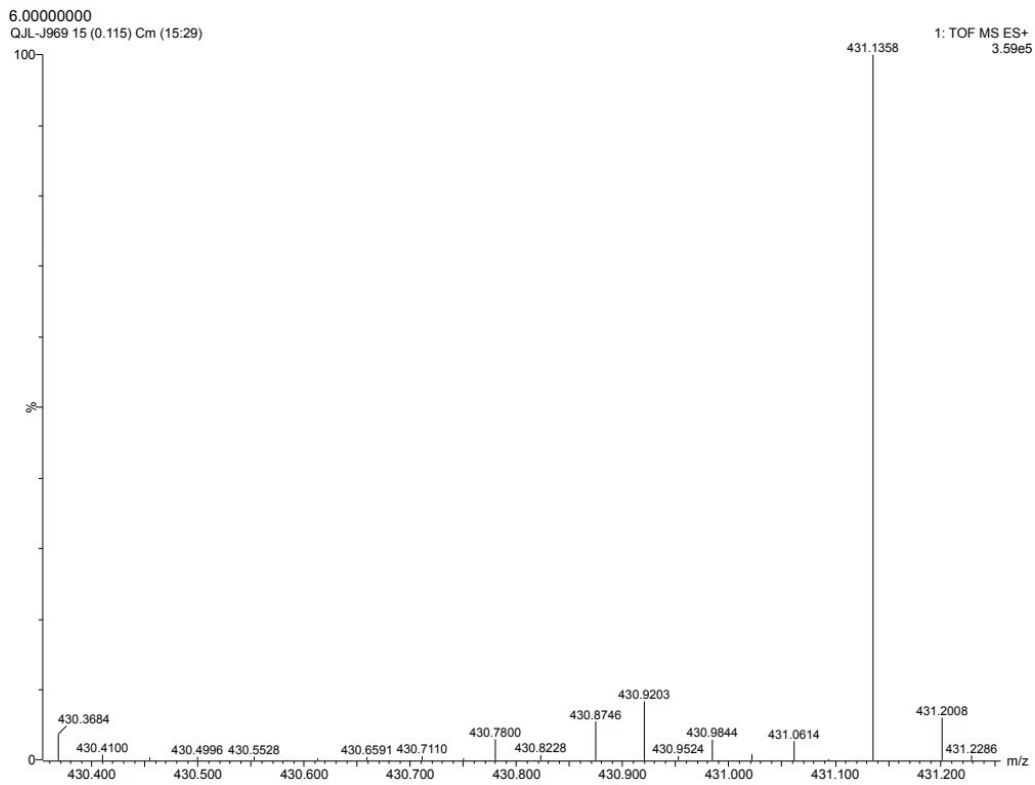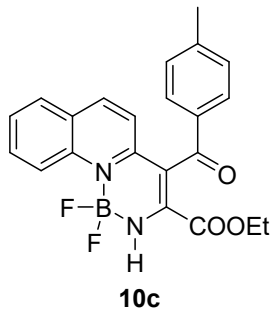

Chemical Formula:  $C_{22}H_{19}BF_2N_2O_3$

Exact Mass: 408.1457

Molecular Weight: 408.2118

m/z: 408.1457 (100.0%), 407.1493 (24.8%), 409.1490 (23.8%), 408.1527 (5.9%), 410.1524 (2.7%)

Elemental Analysis: C, 64.73; H, 4.69; B, 2.65; F, 9.31; N, 6.86; O, 11.76

HRMS (ESI, m/z) calcd for  $C_{22}H_{19}BF_2N_2O_3$   $[M+Na]^+$  431.1349, found 431.1358.

# 10d

J961-1-H.10.fid

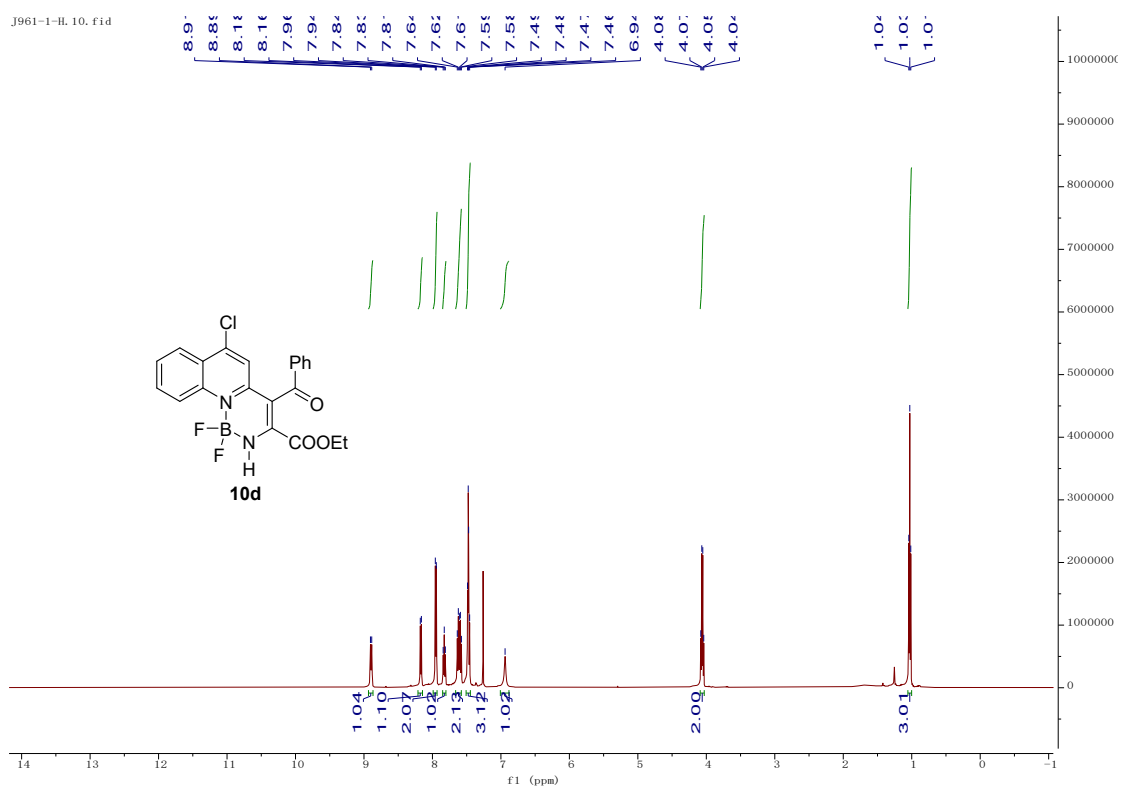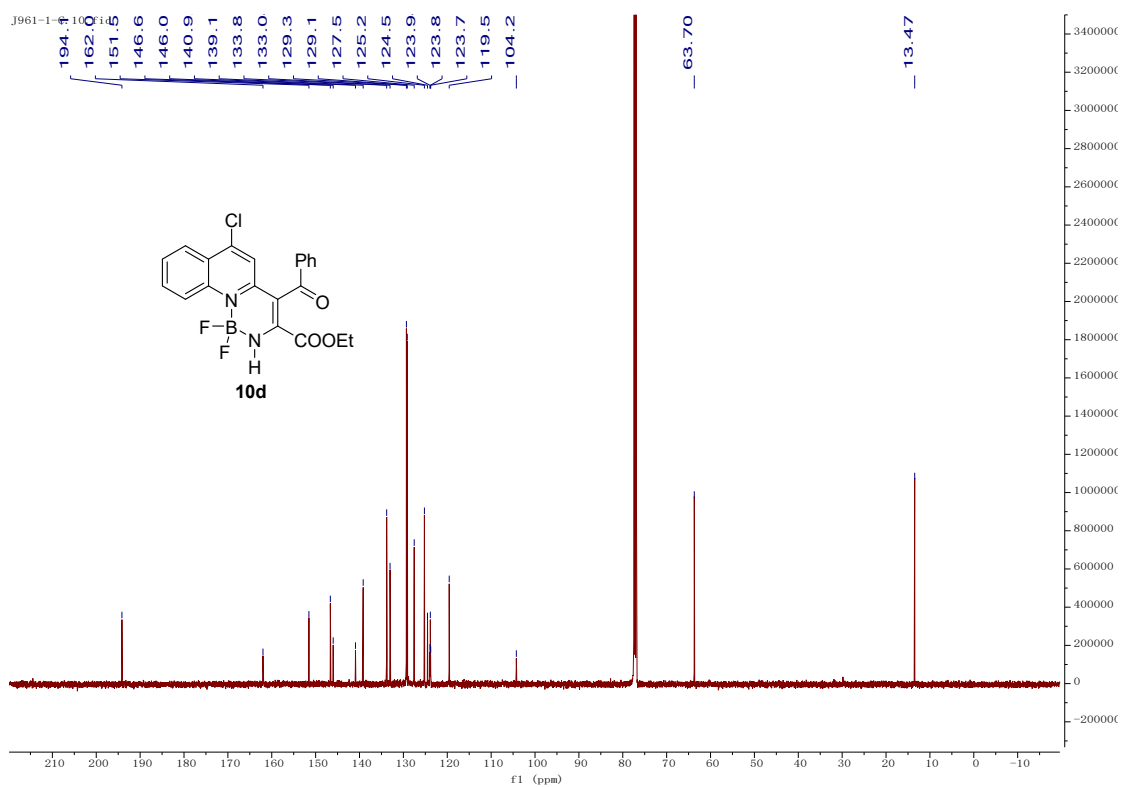

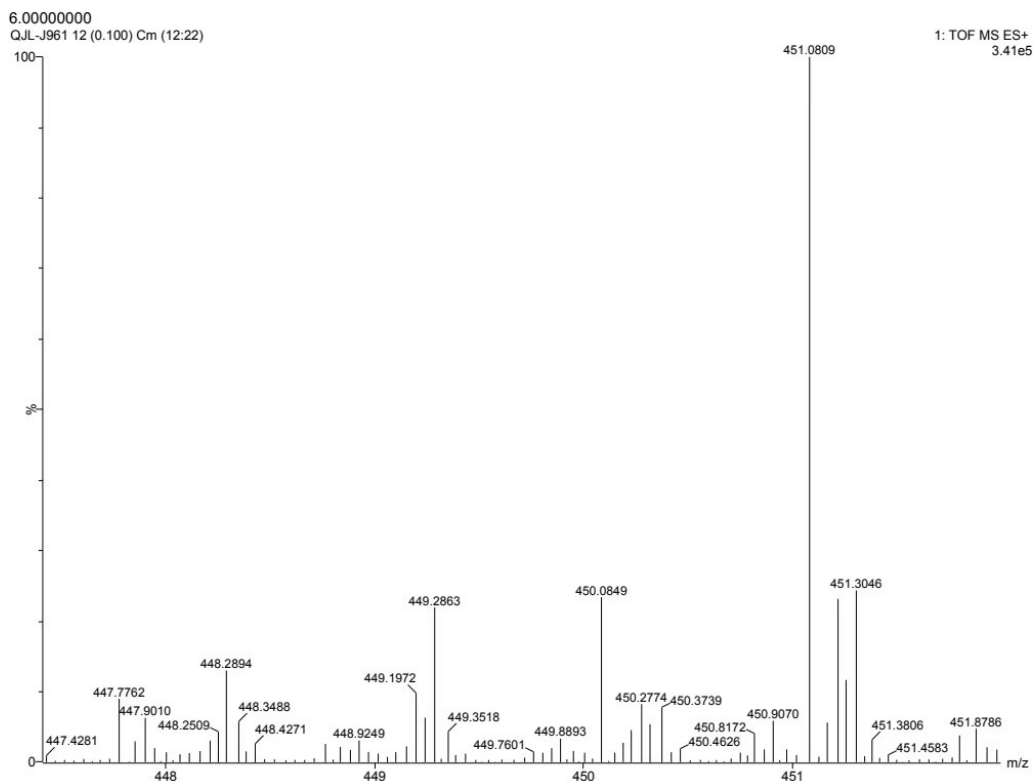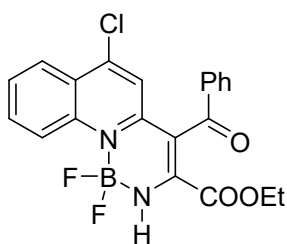

**10d**

Chemical Formula:  $C_{21}H_{16}BClF_2N_2O_3$

Exact Mass: 428.0911

Molecular Weight: 428.6268

m/z: 428.0911 (100.0%), 430.0881 (32.0%), 427.0947 (24.8%), 429.0944 (22.7%),  
429.0917 (7.9%), 431.0915 (7.3%), 428.0980 (5.6%), 430.0978 (2.5%), 430.0951 (1.8%)

Elemental Analysis: C, 58.85; H, 3.76; B, 2.52; Cl, 8.27; F, 8.86; N, 6.54; O, 11.20

HRMS (ESI, m/z) calcd for  $C_{21}H_{16}BClF_2N_2O_3$   $[M+Na]^+$  451.0803, found 451.0809.

**10e**

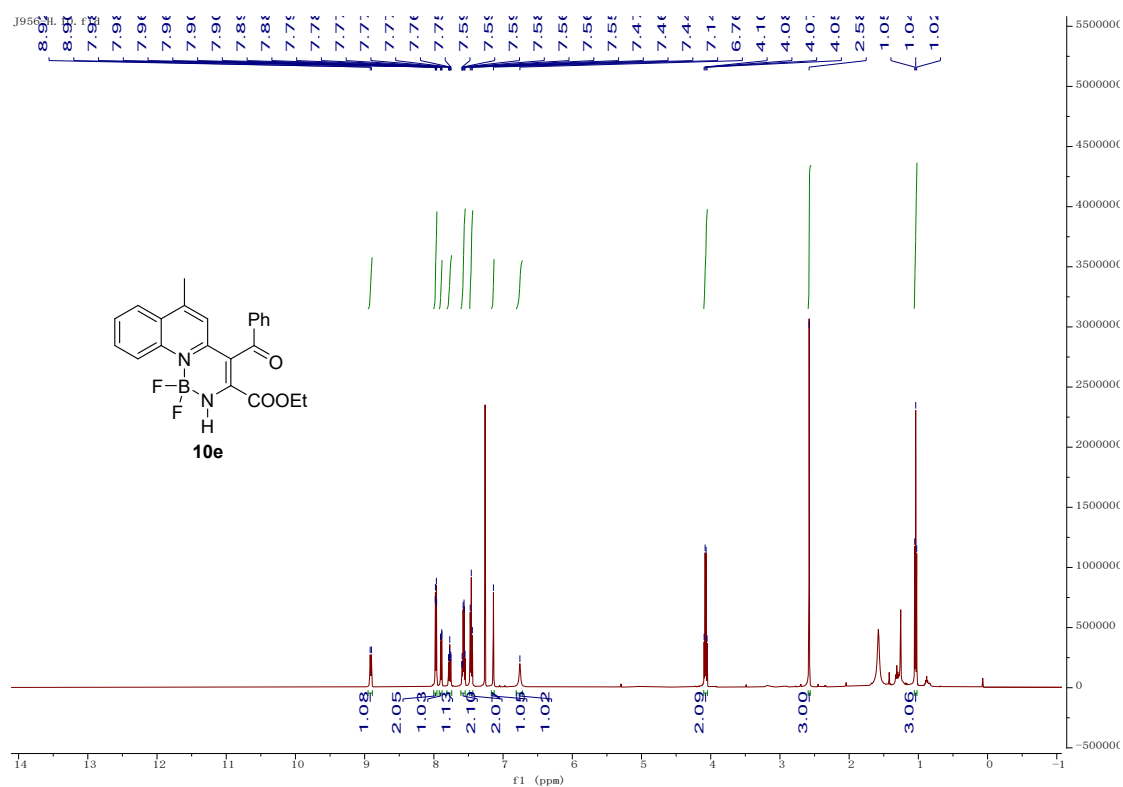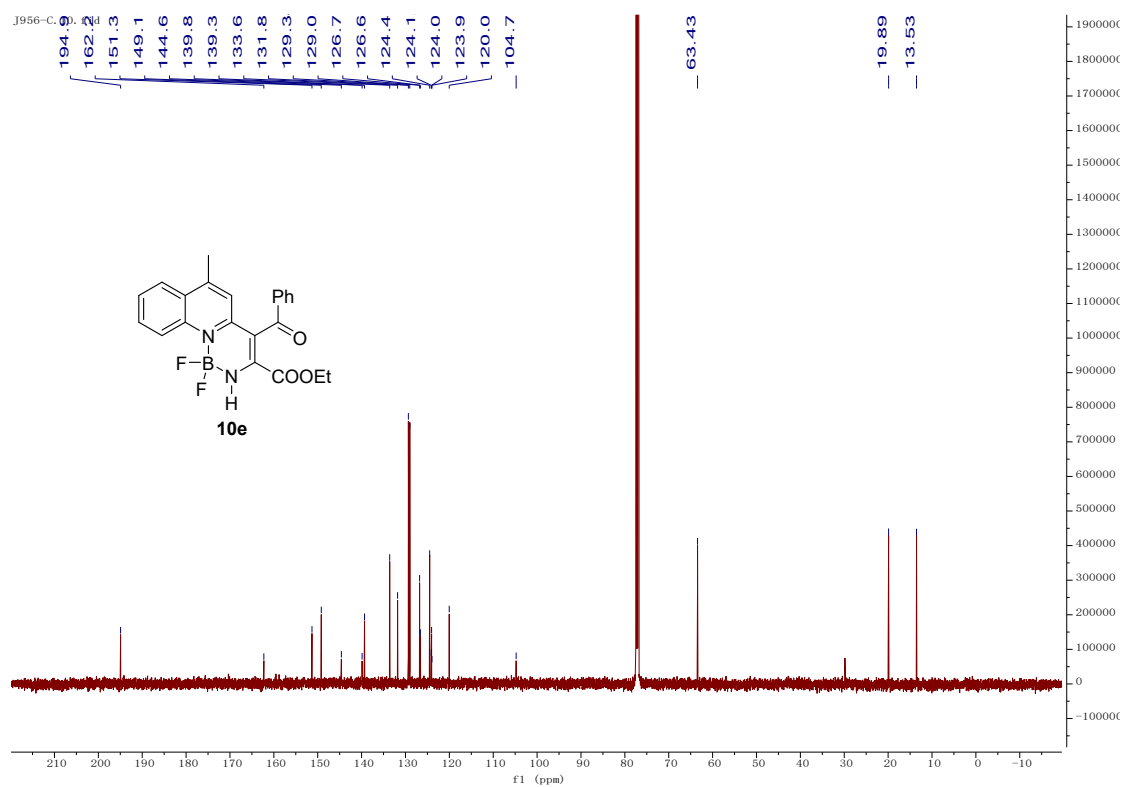

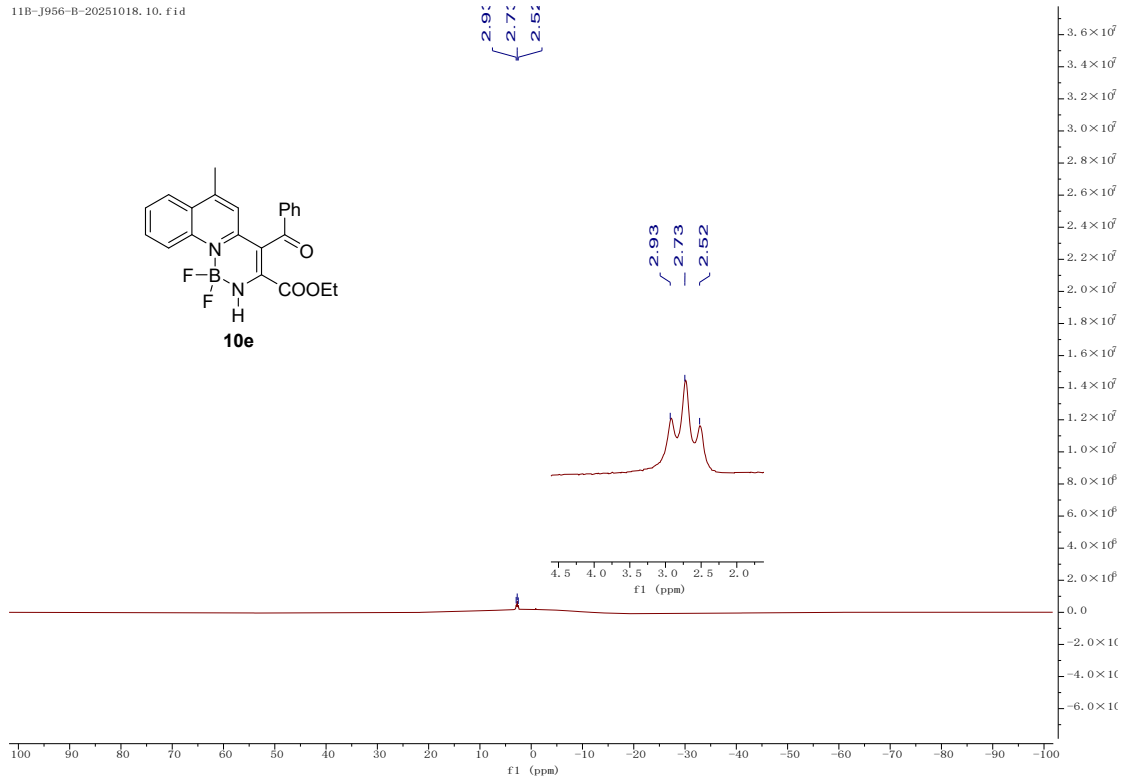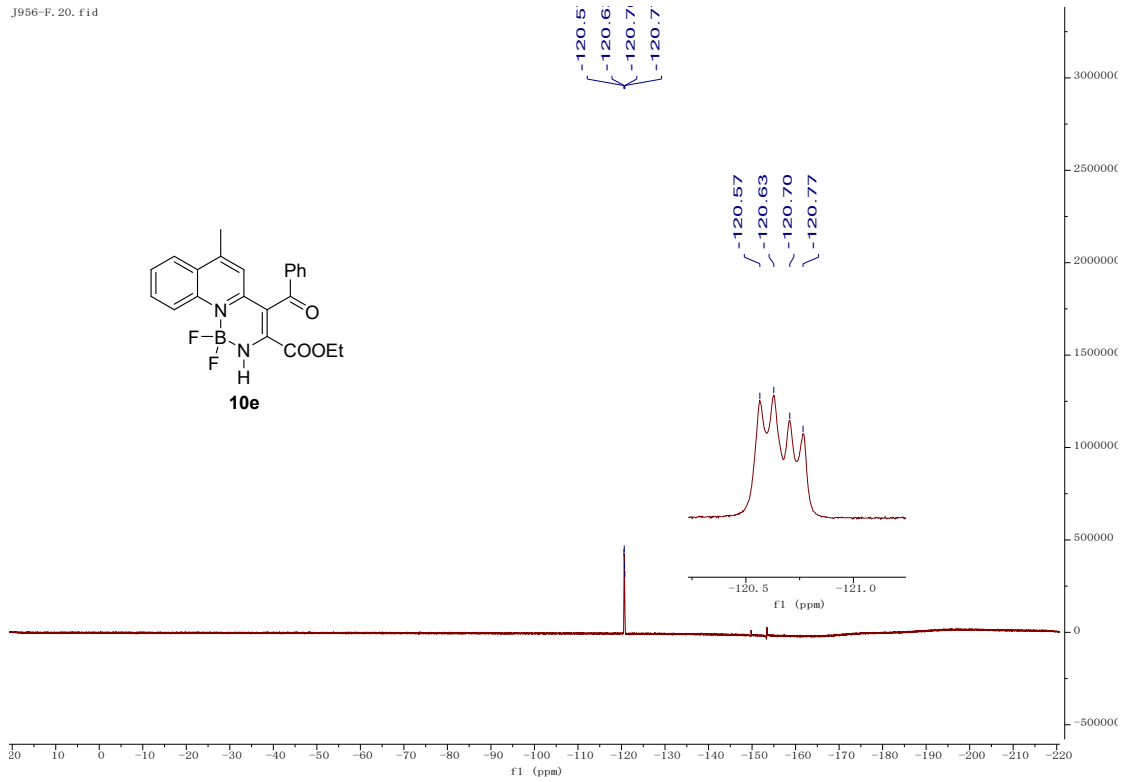

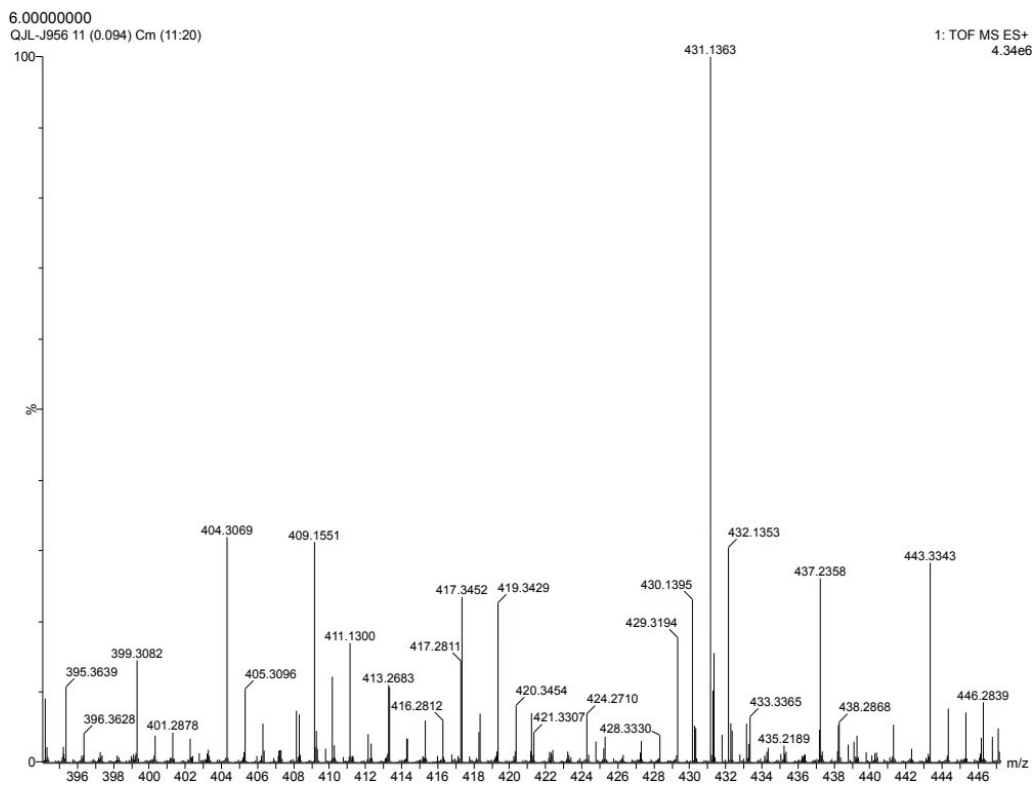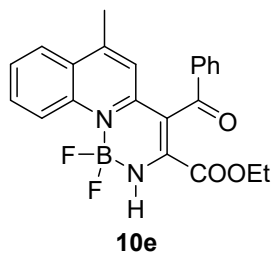

Chemical Formula:  $C_{22}H_{19}BF_2N_2O_3$

Exact Mass: 408.1457

Molecular Weight: 408.2118

m/z: 408.1457 (100.0%), 407.1493 (24.8%), 409.1490 (23.8%), 408.1527 (5.9%), 410.1524 (2.7%)

Elemental Analysis: C, 64.73; H, 4.69; B, 2.65; F, 9.31; N, 6.86; O, 11.76

HRMS (ESI, m/z) calcd for  $C_{22}H_{19}BF_2N_2O_3$   $[M+Na]^+$  431.1349, found 431.1363.

10f

J977-H. 10. fid

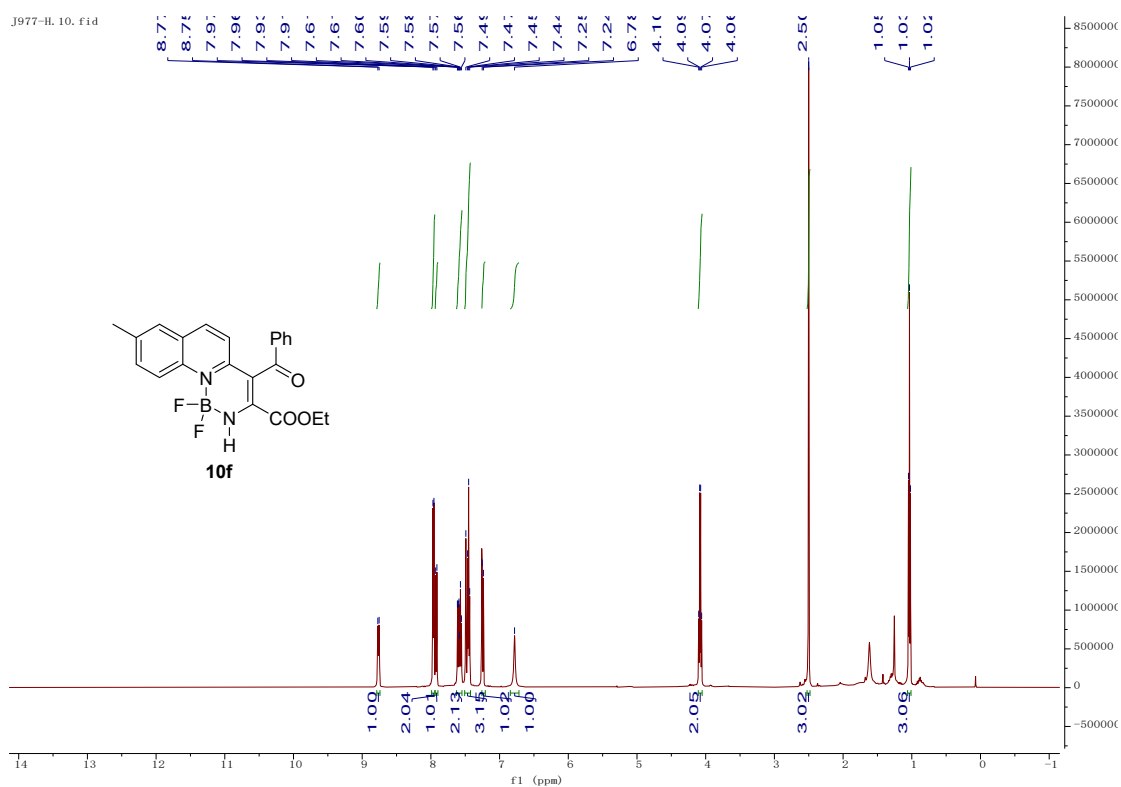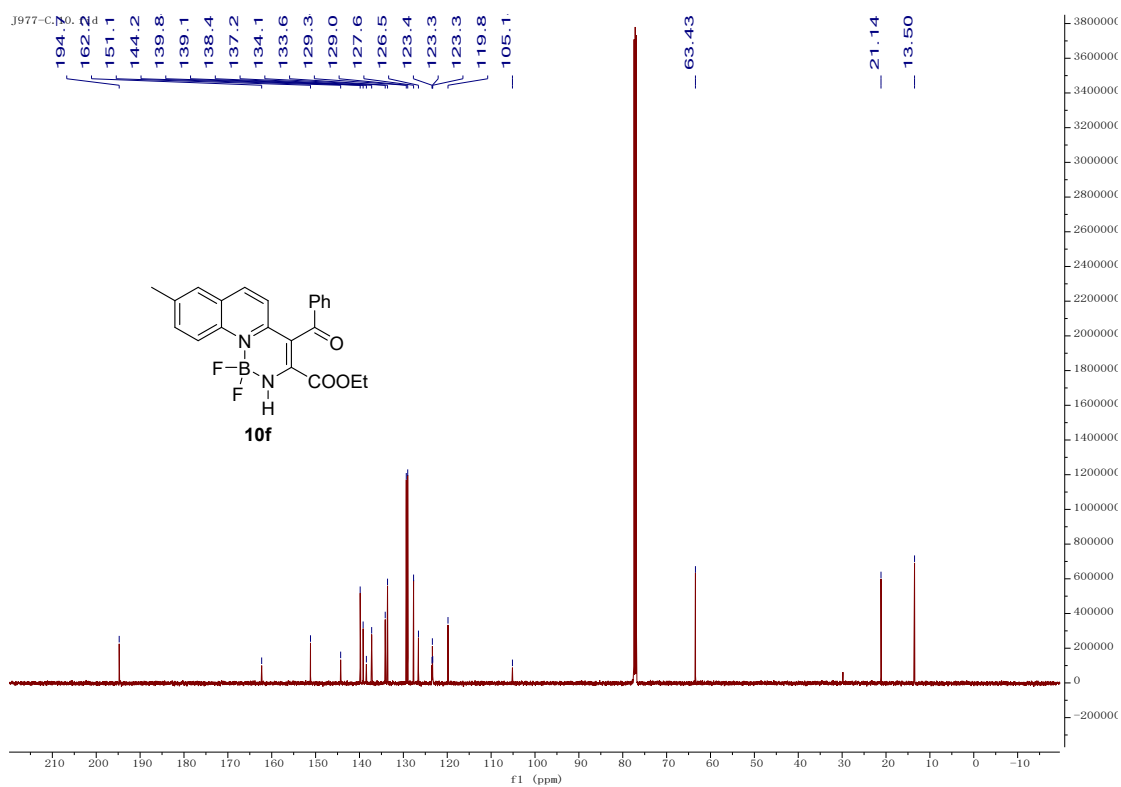

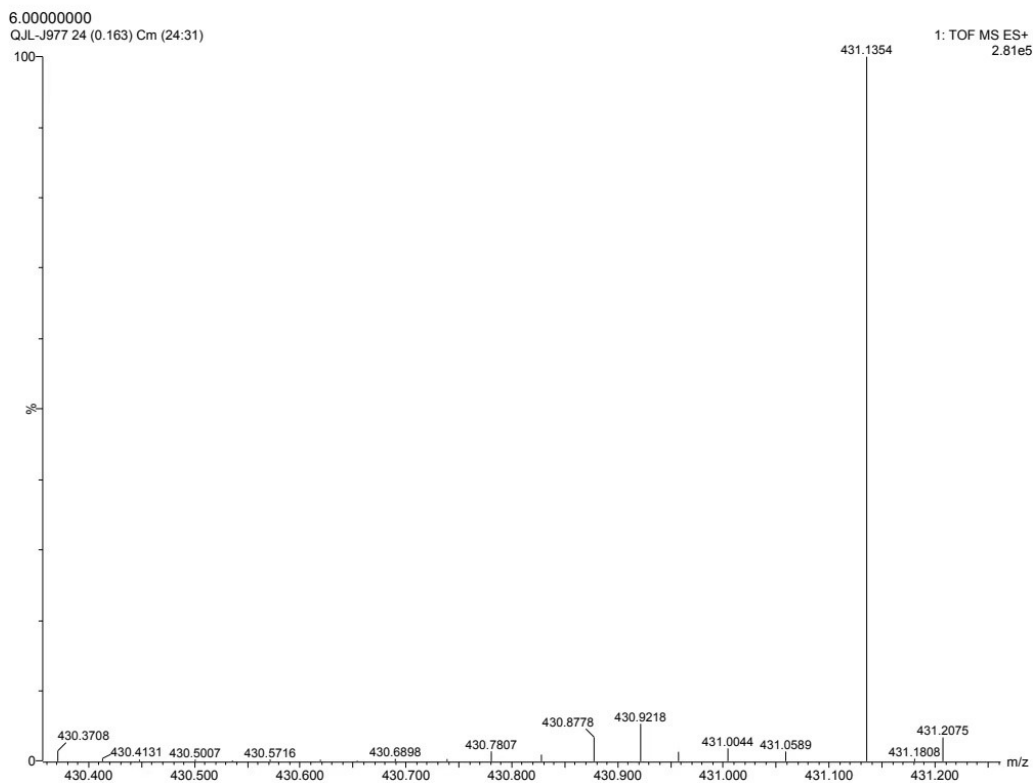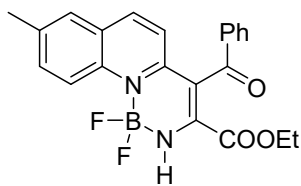

**10f**

Chemical Formula:  $C_{22}H_{19}BF_2N_2O_3$

Exact Mass: 408.1457

Molecular Weight: 408.2118

m/z: 408.1457 (100.0%), 407.1493 (24.8%), 409.1490 (23.8%), 408.1527 (5.9%), 410.1524 (2.7%)

Elemental Analysis: C, 64.73; H, 4.69; B, 2.65; F, 9.31; N, 6.86; O, 11.76

HRMS (ESI, m/z) calcd for  $C_{22}H_{19}BF_2N_2O_3$   $[M+Na]^+$  431.1349, found 431.1354.

# 10g

J978-H.10.fid

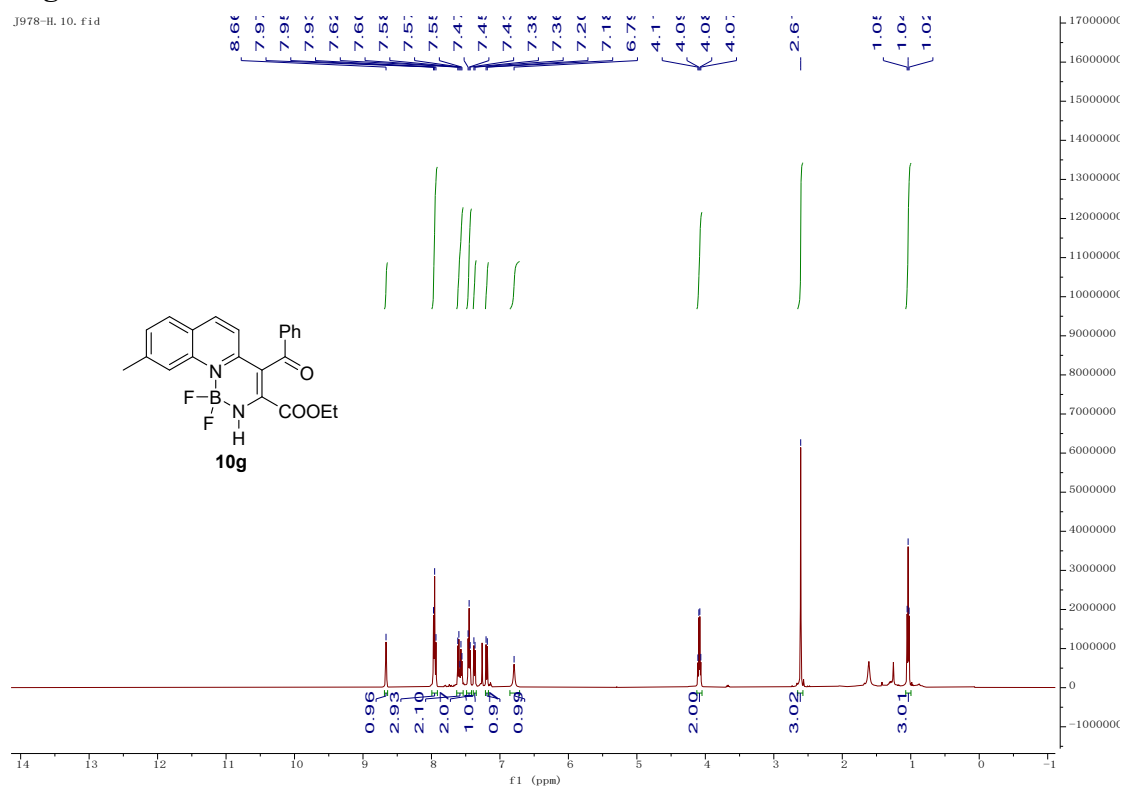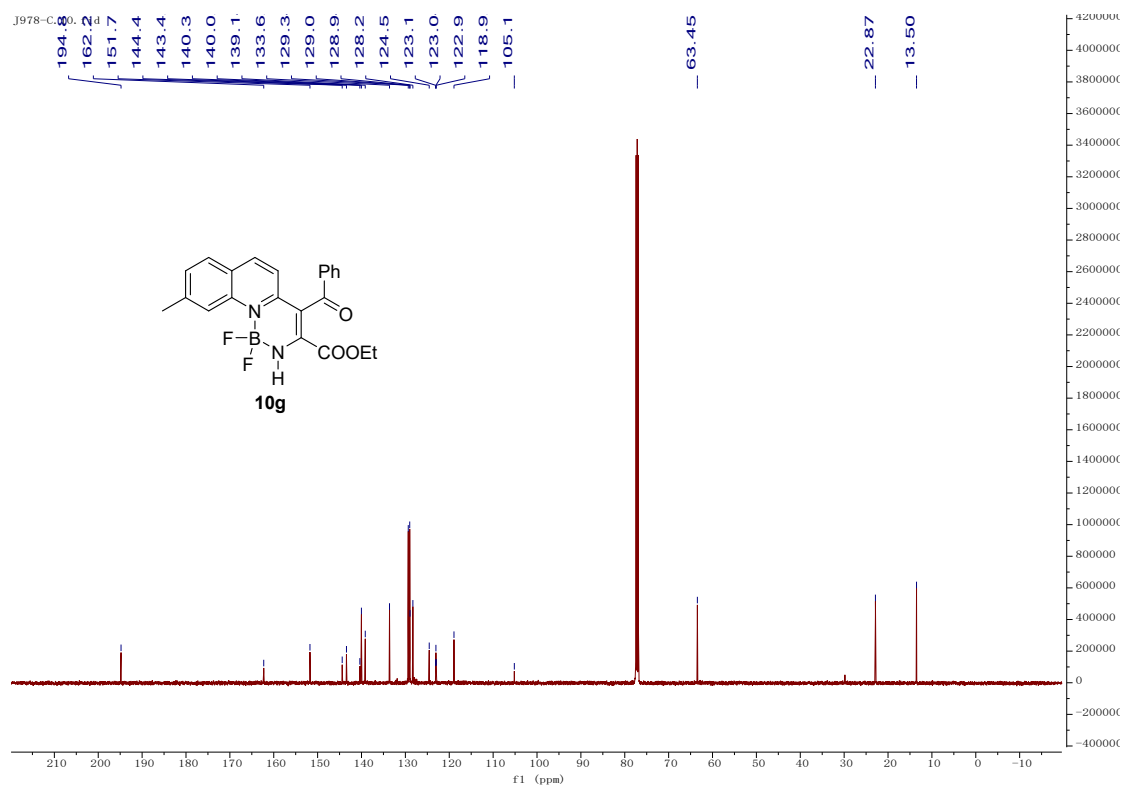

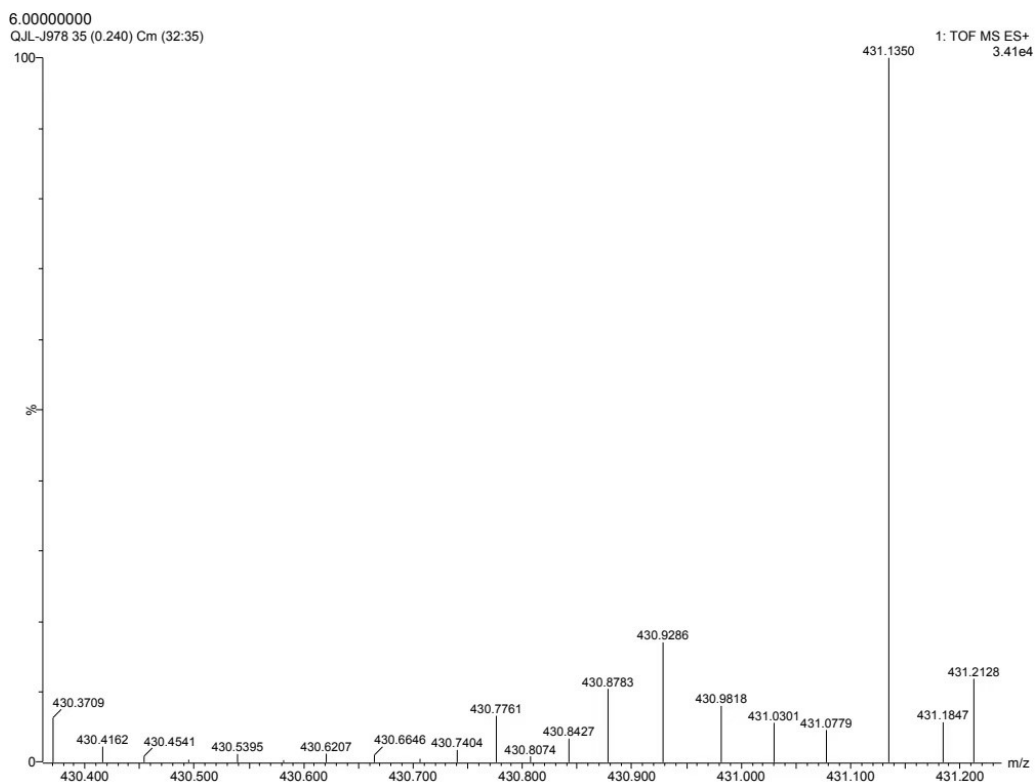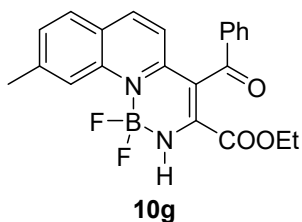

Chemical Formula:  $C_{22}H_{19}BF_2N_2O_3$

Exact Mass: 408.1457

Molecular Weight: 408.2118

m/z: 408.1457 (100.0%), 407.1493 (24.8%), 409.1490 (23.8%), 408.1527 (5.9%), 410.1524 (2.7%)

Elemental Analysis: C, 64.73; H, 4.69; B, 2.65; F, 9.31; N, 6.86; O, 11.76

HRMS (ESI, m/z) calcd for  $C_{22}H_{19}BF_2N_2O_3$   $[M+Na]^+$  431.1349, found 431.1350.

10h

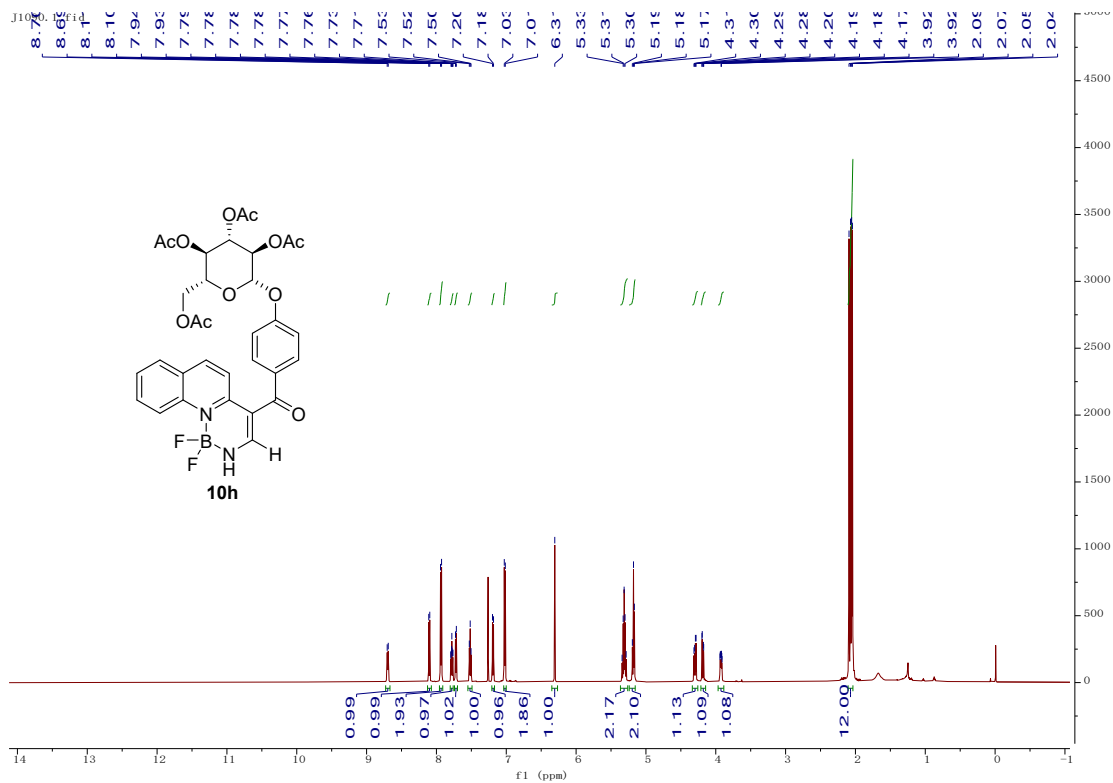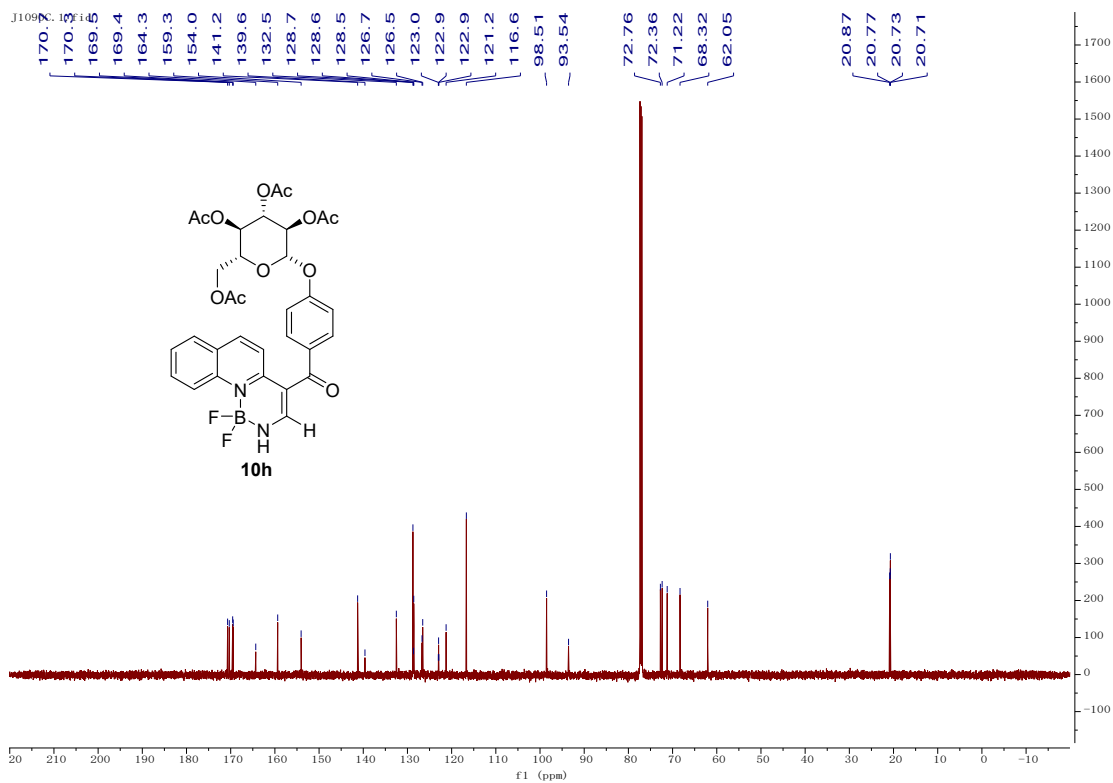

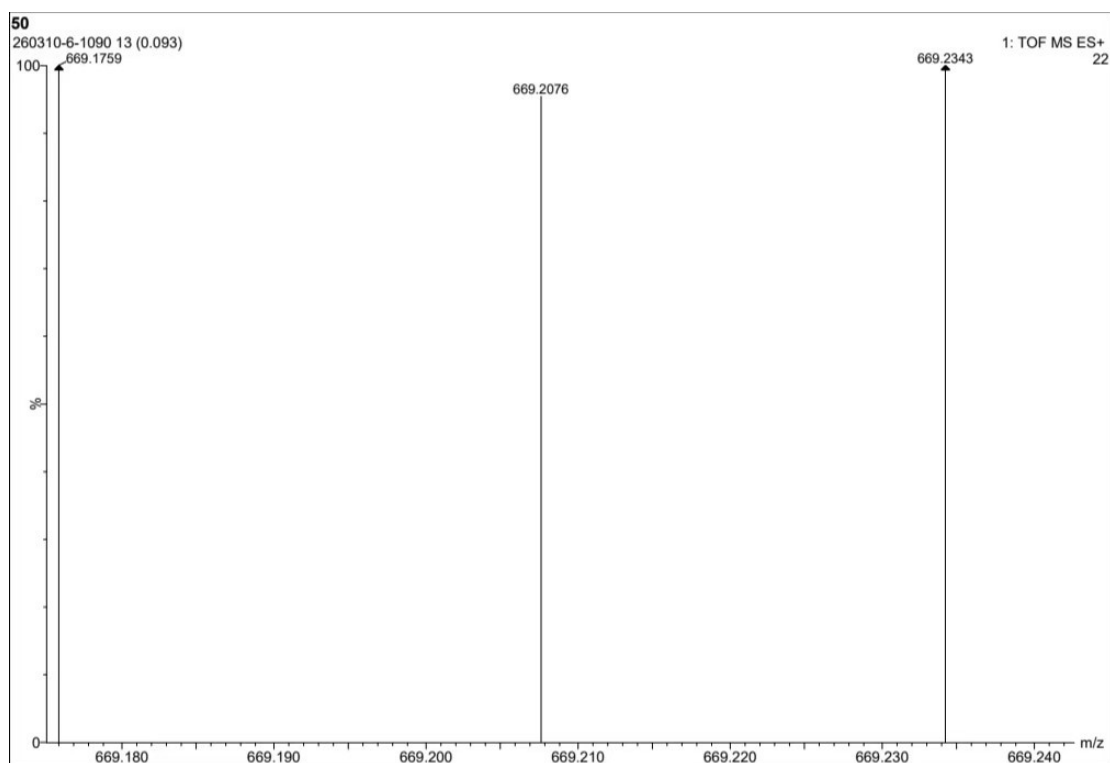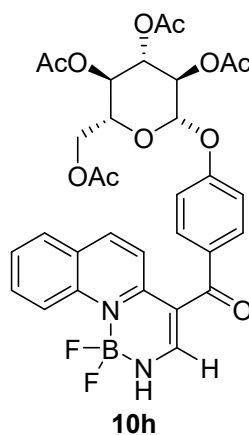

Chemical Formula:  $C_{32}H_{31}BF_2N_2O_{11}$

Exact Mass: 668.1989

Molecular Weight: 668.4098

m/z: 668.1989 (100.0%), 669.2023 (34.6%), 667.2025 (24.8%),  
668.2059 (8.6%), 670.2056 (5.8%), 670.2031 (2.3%), 669.2092 (1.4%)  
Elemental Analysis: C, 57.50; H, 4.67; B, 1.62; F, 5.68; N, 4.19; O, 26.33

HRMS (ESI, m/z) calcd for  $C_{32}H_{31}BF_2N_2O_{11}$   $[M+H]^+$  669.2062, found 669.2076.

# 11a

J817-H. 10. fid

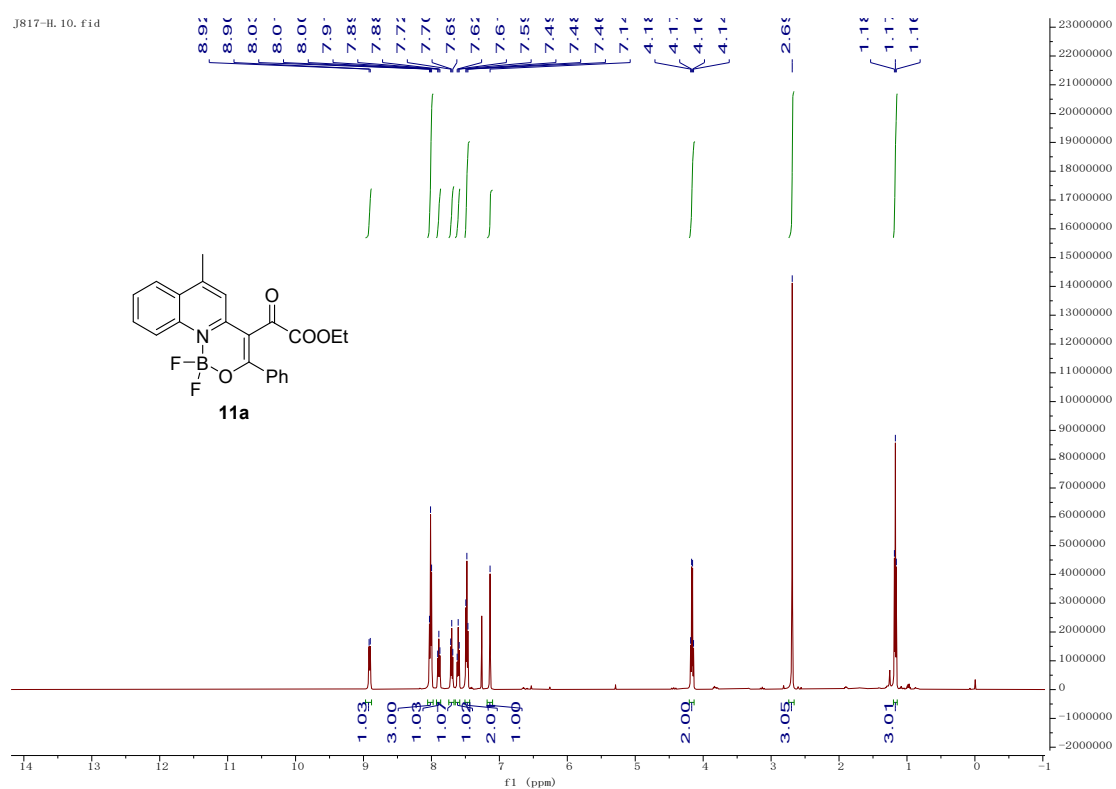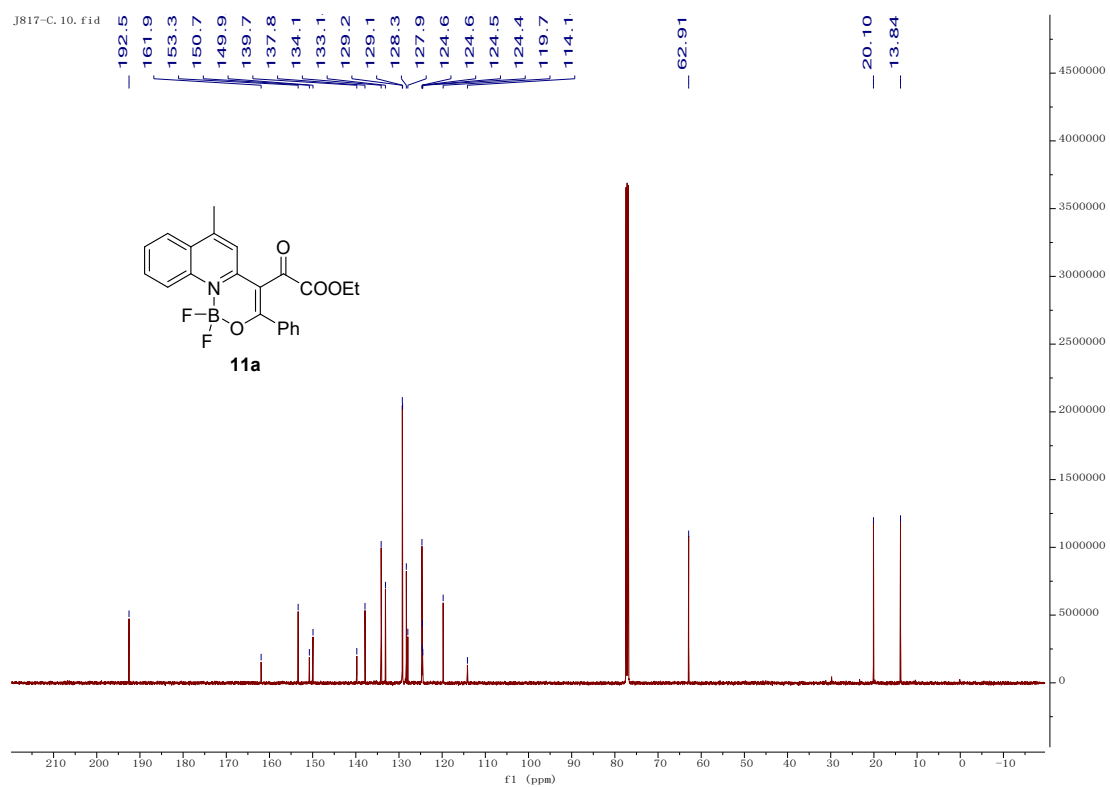

11B-J939-B-20251018.10.fid

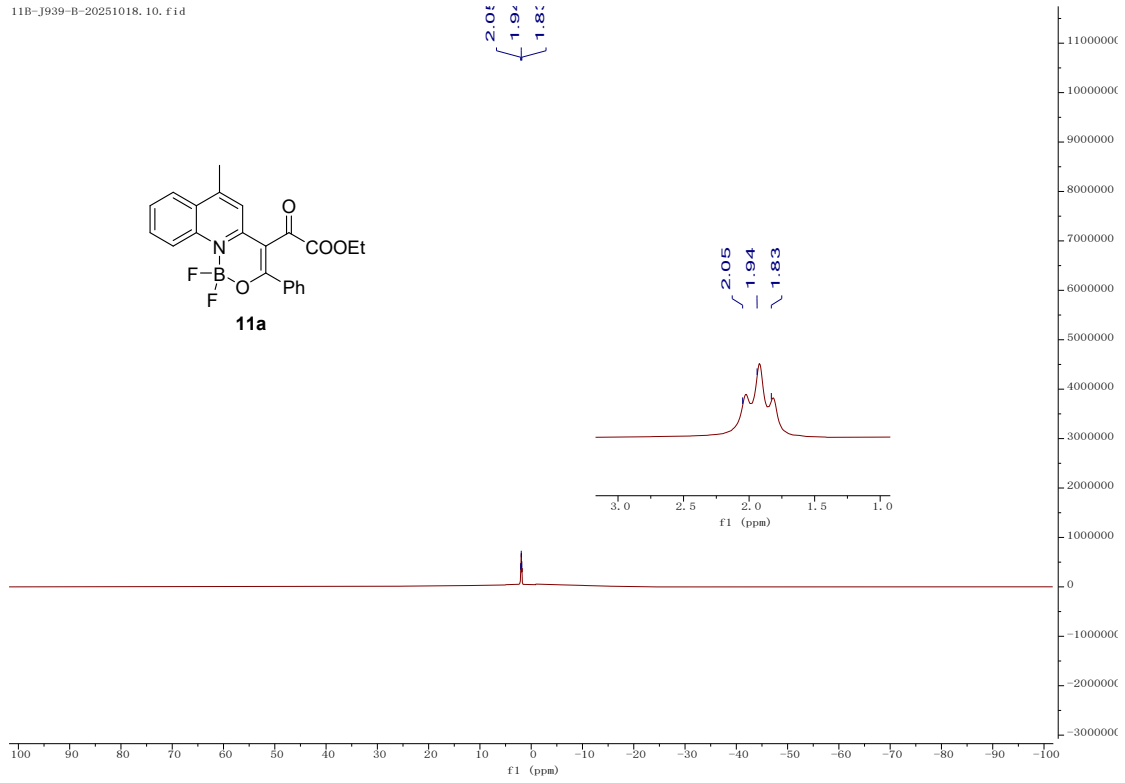

J939-F.20.fid

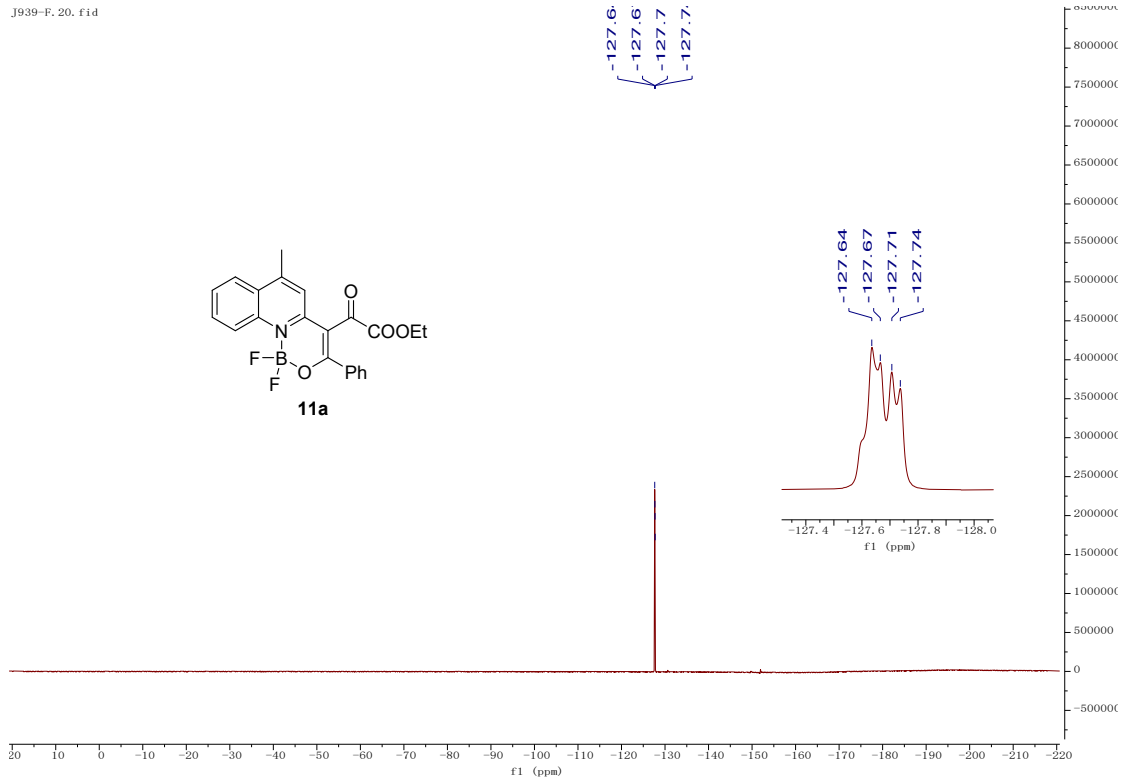

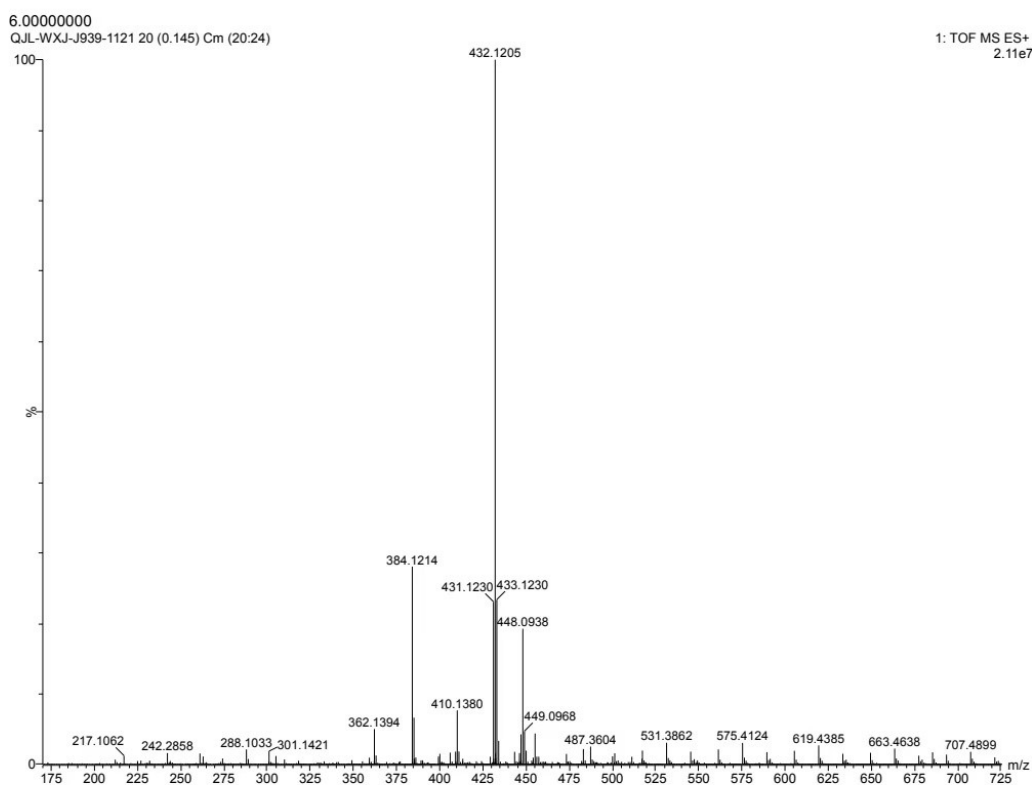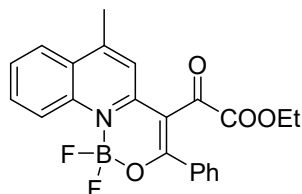

**11a**

Chemical Formula:  $C_{22}H_{18}BF_2NO_4$

Exact Mass: 409.1297

Molecular Weight: 409.1958

m/z: 409.1297 (100.0%), 408.1333 (24.8%), 410.1330 (23.8%), 409.1367 (5.9%), 411.1364 (2.7%)

Elemental Analysis: C, 64.58; H, 4.43; B, 2.64; F, 9.29; N, 3.42; O, 15.64

HRMS (ESI, m/z) calcd for  $C_{22}H_{18}BF_2N_2O_4$   $[M+Na]^+$  432.1190, found 432.1205.

# 11b

J923-h, 10, fid

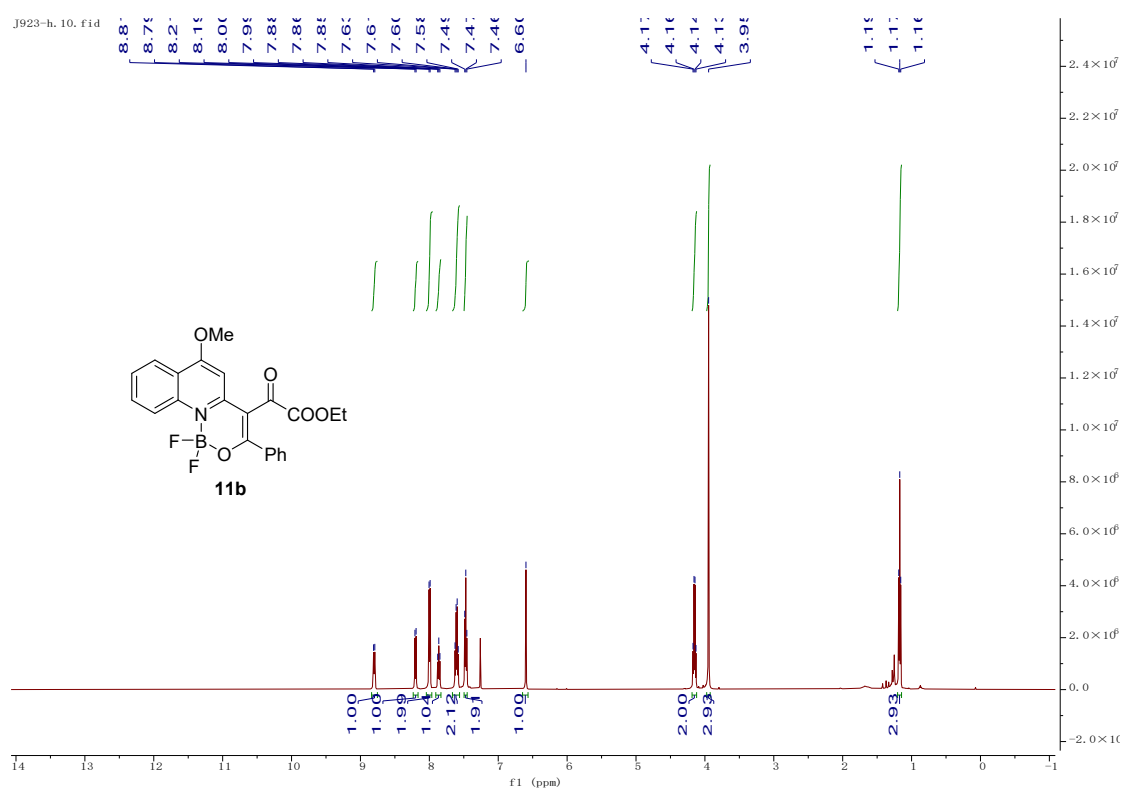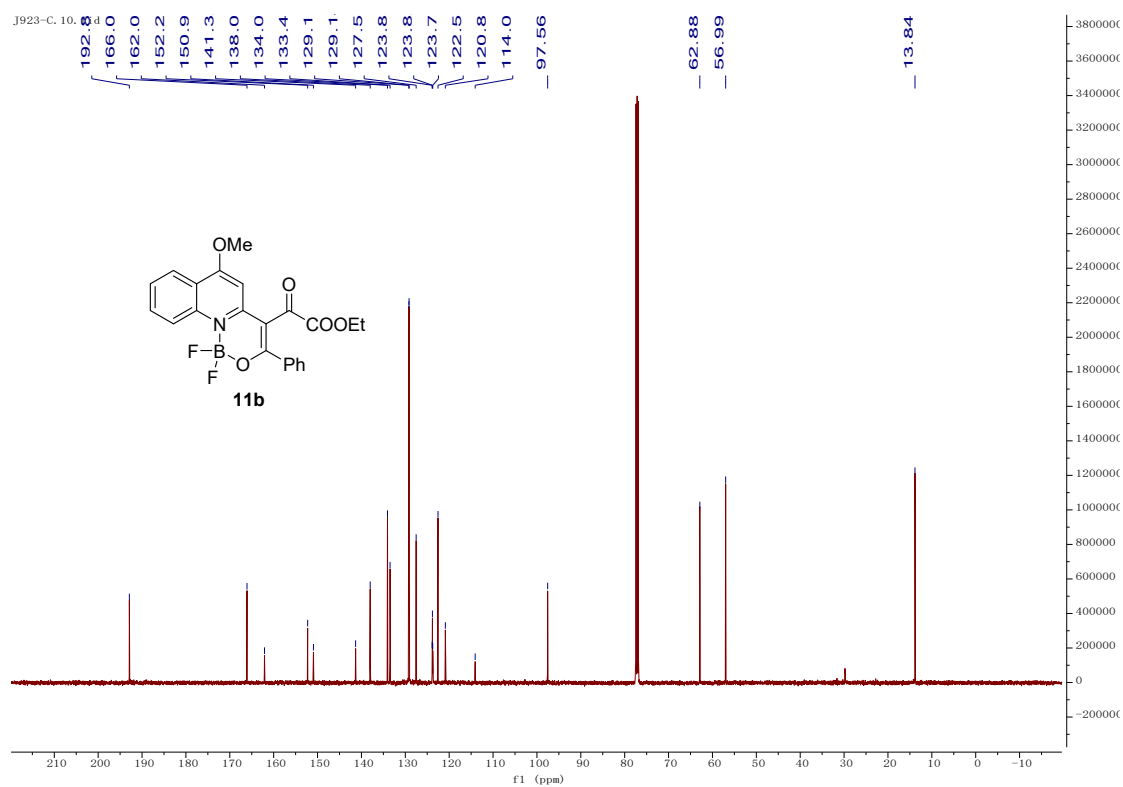

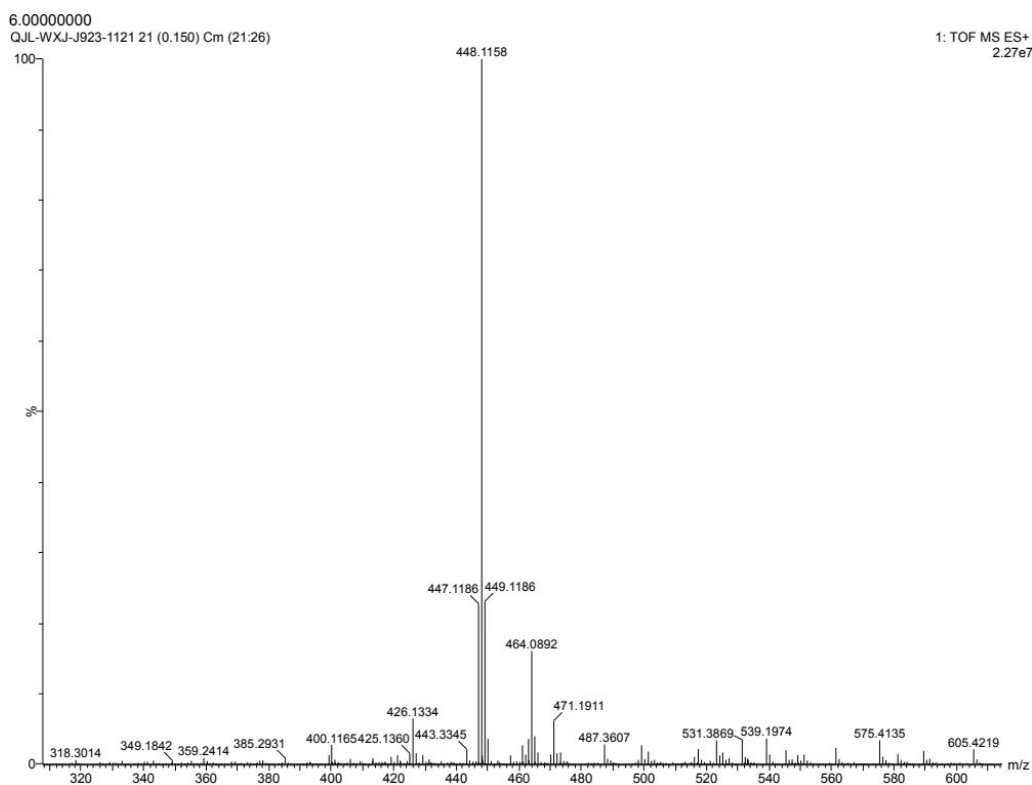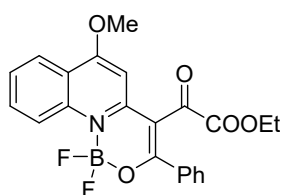

**11b**

Chemical Formula:  $C_{22}H_{18}BF_2NO_5$

Exact Mass: 425.1246

Molecular Weight: 425.1948

m/z: 425.1246 (100.0%), 424.1282 (24.8%), 426.1280 (23.8%), 425.1316 (5.9%), 427.1313 (2.7%), 427.1289 (1.0%)

Elemental Analysis: C, 62.15; H, 4.27; B, 2.54; F, 8.94; N, 3.29; O, 18.81

HRMS (ESI, m/z) calcd for  $C_{22}H_{18}BF_2N_2O_5$   $[M+Na]^+$  448.1139, found 448.1158.

# 11c

J979-H.10.fid

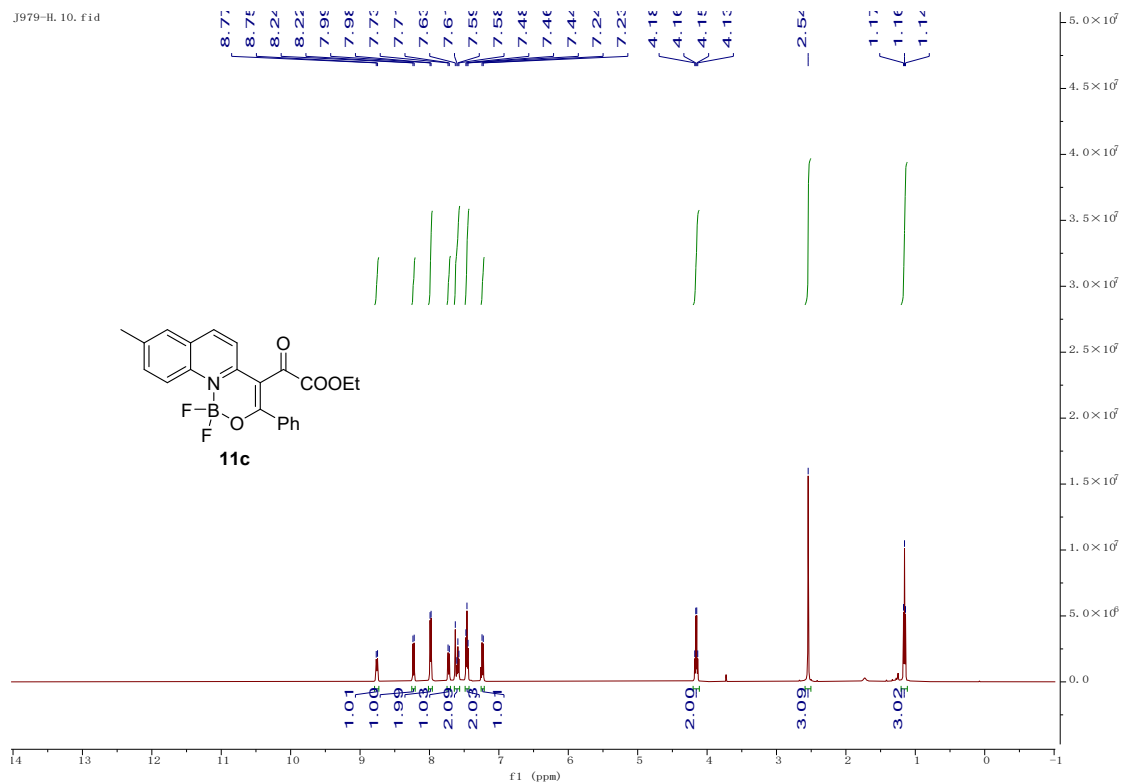

J979-C.10.fid

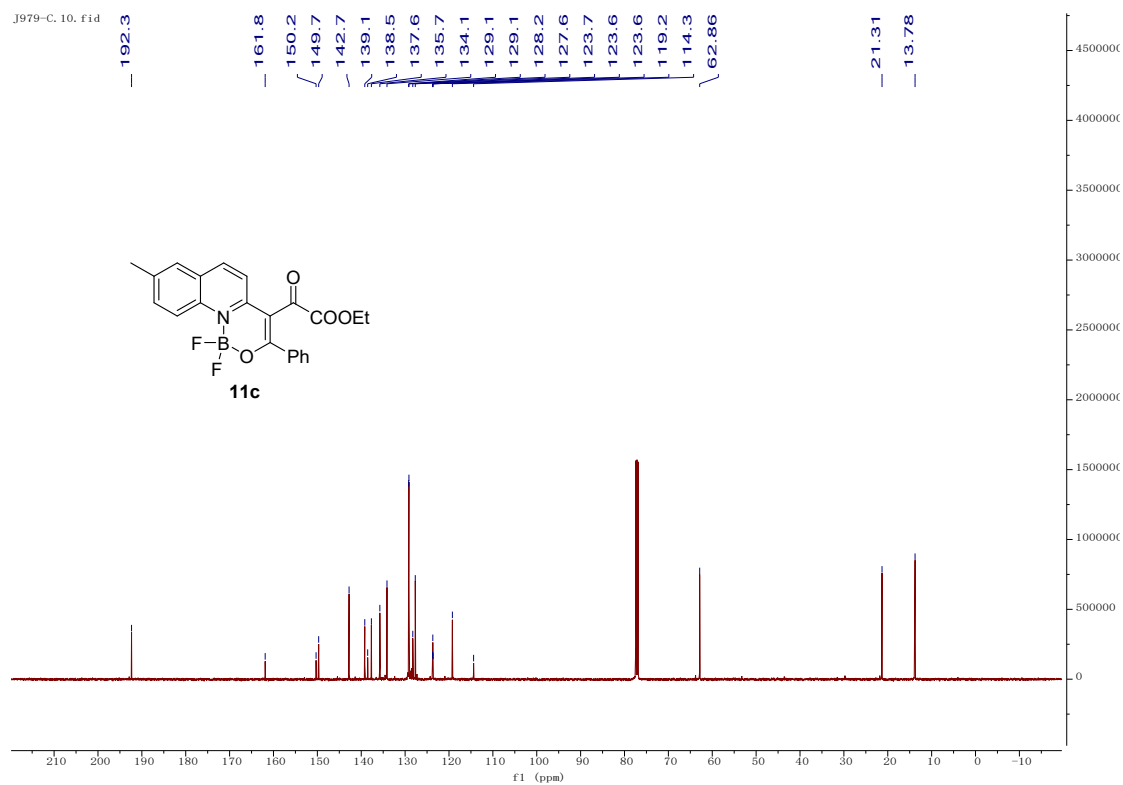

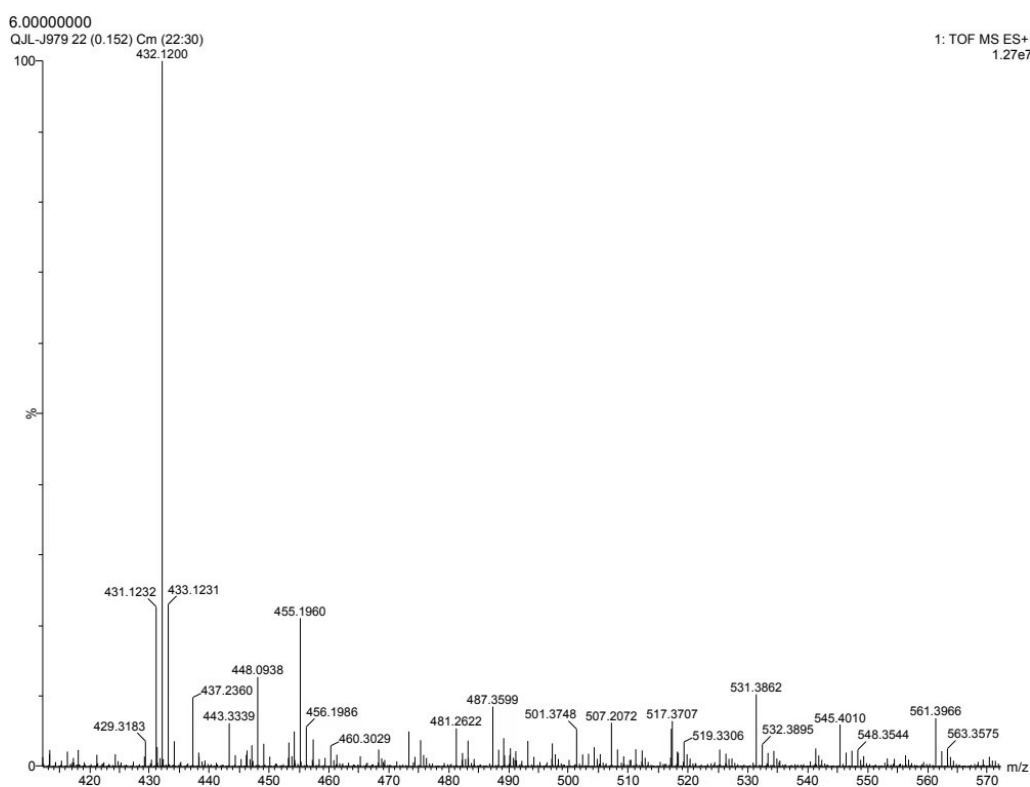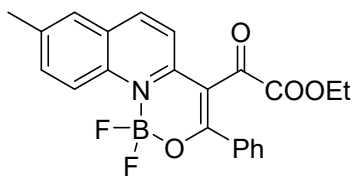

**11c**

Chemical Formula:  $C_{22}H_{18}BF_2NO_4$

Exact Mass: 409.1297

Molecular Weight: 409.1958

m/z: 409.1297 (100.0%), 408.1333 (24.8%), 410.1330 (23.8%), 409.1367 (5.9%), 411.1364 (2.7%)

Elemental Analysis: C, 64.58; H, 4.43; B, 2.64; F, 9.29; N, 3.42; O, 15.64

HRMS (ESI, m/z) calcd for  $C_{22}H_{18}BF_2NO_4$   $[M+Na]^+$  432.1190, found 432.1200.

# 11d

J980-H.10.fid

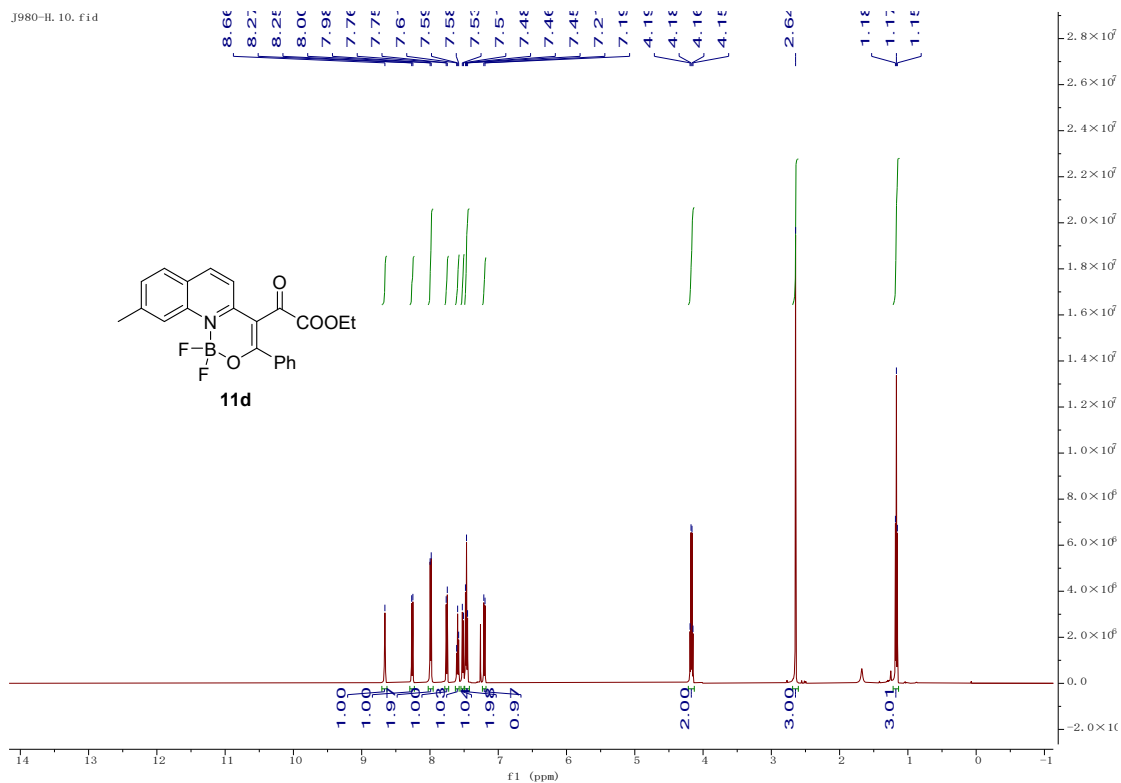

J980-C.10.fid

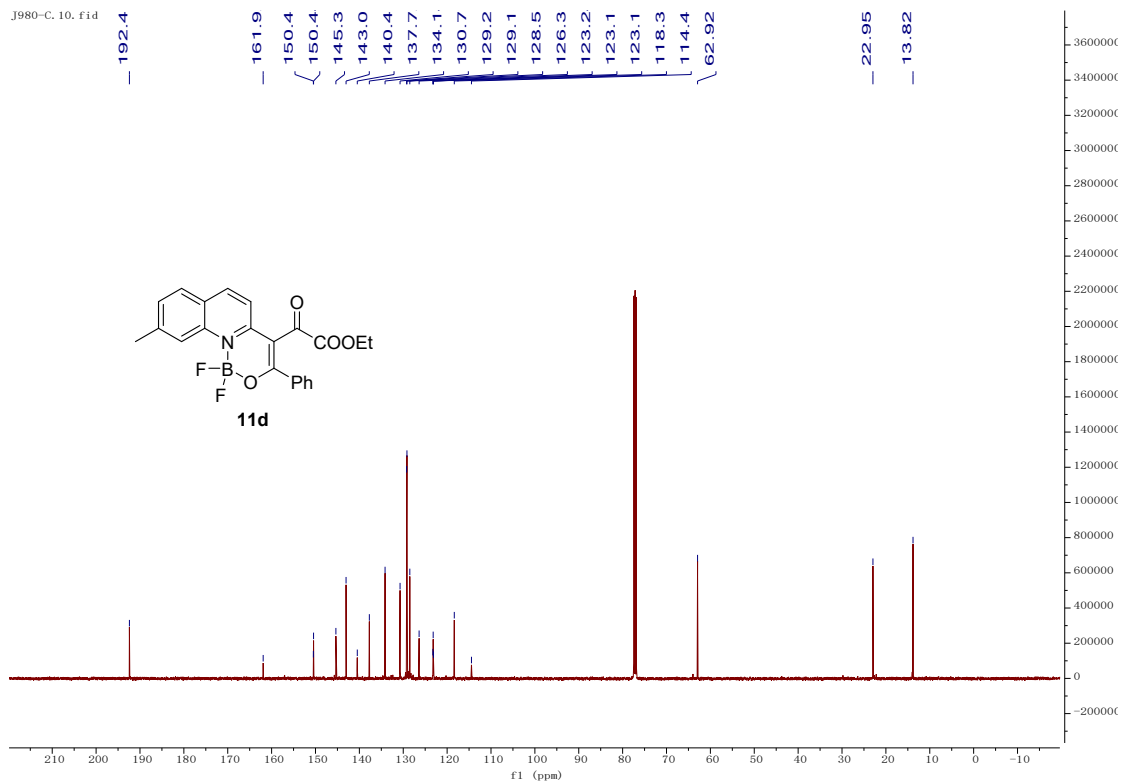

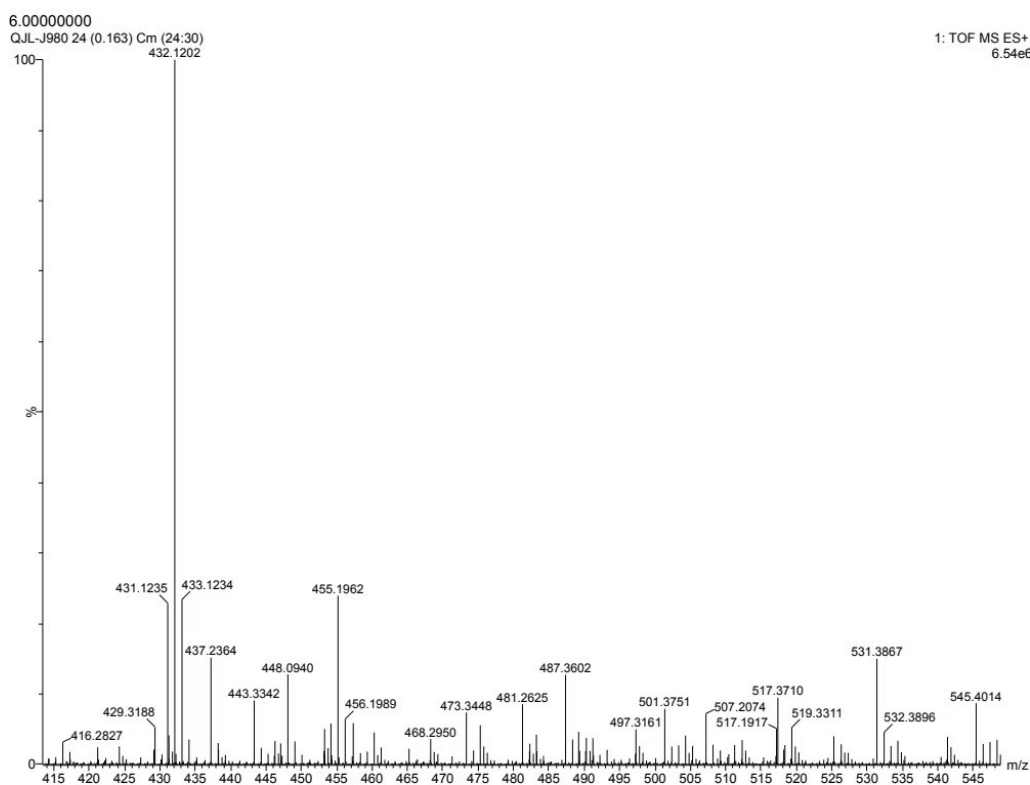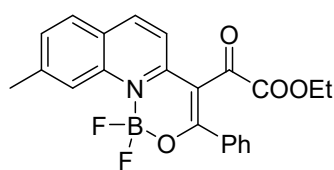

**11d**

Chemical Formula:  $C_{22}H_{18}BF_2NO_4$

Exact Mass: 409.1297

Molecular Weight: 409.1958

m/z: 409.1297 (100.0%), 408.1333 (24.8%), 410.1330 (23.8%), 409.1367 (5.9%), 411.1364 (2.7%)

Elemental Analysis: C, 64.58; H, 4.43; B, 2.64; F, 9.29; N, 3.42; O, 15.64

HRMS (ESI, m/z) calcd for  $C_{22}H_{18}BF_2NO_4$   $[M+Na]^+$  432.1190, found 432.1202.

11e

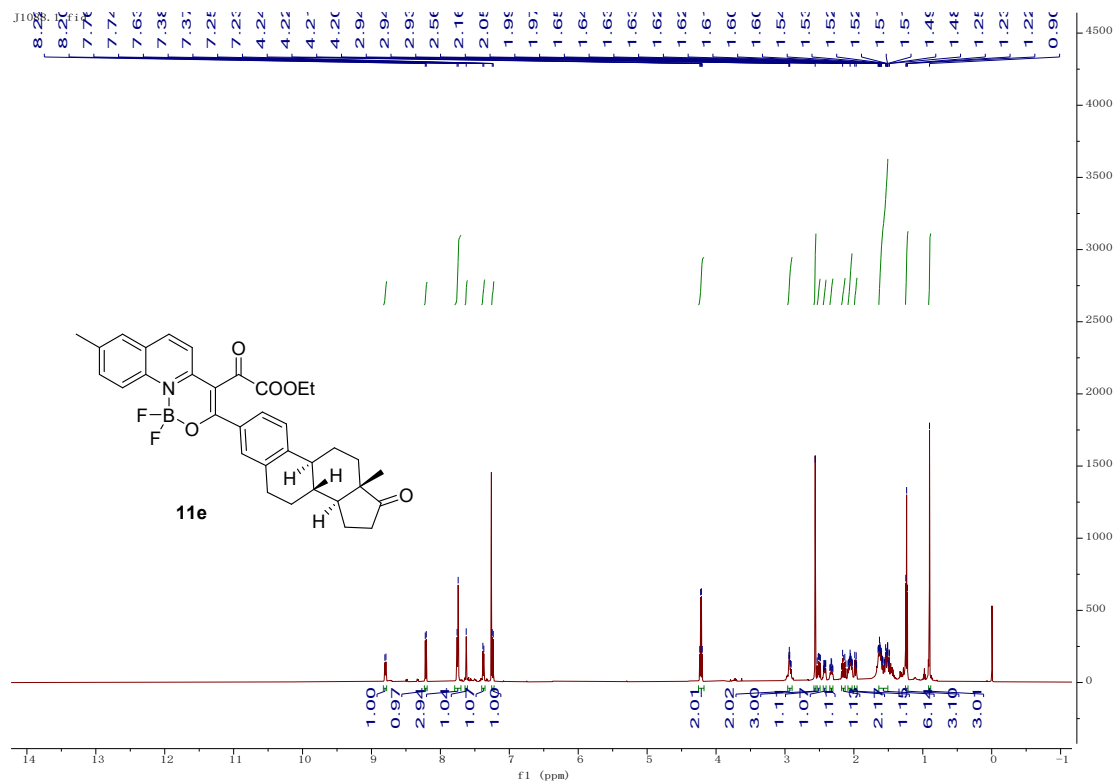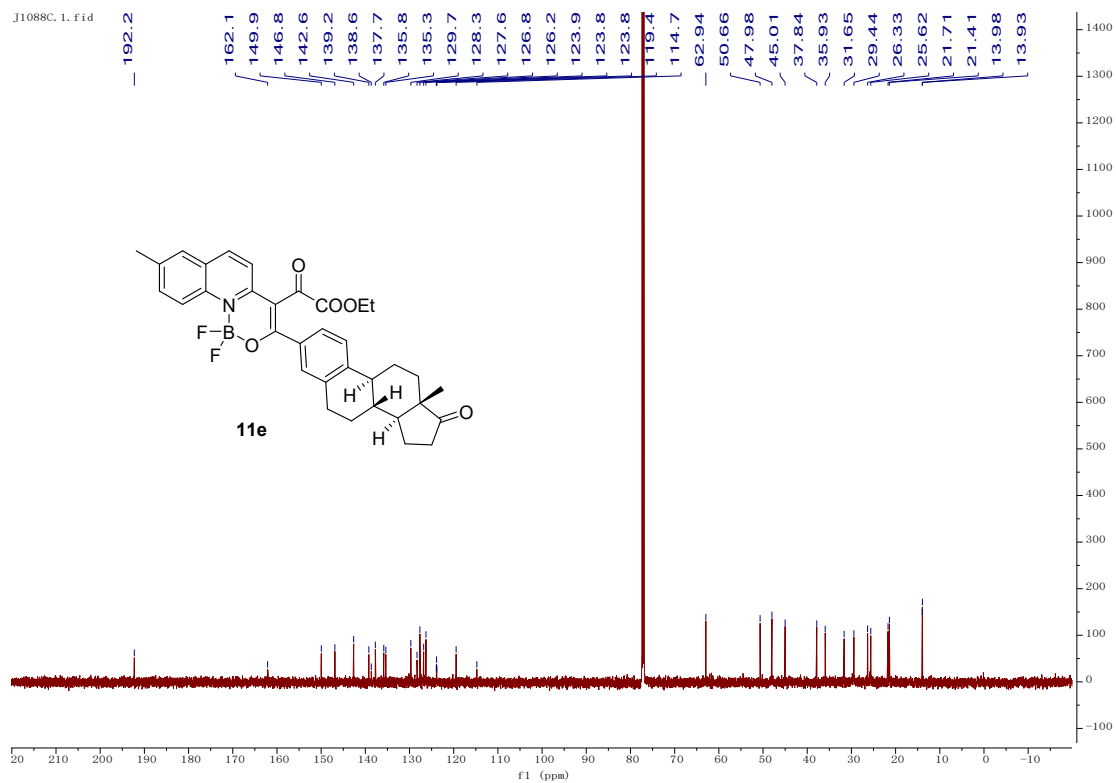

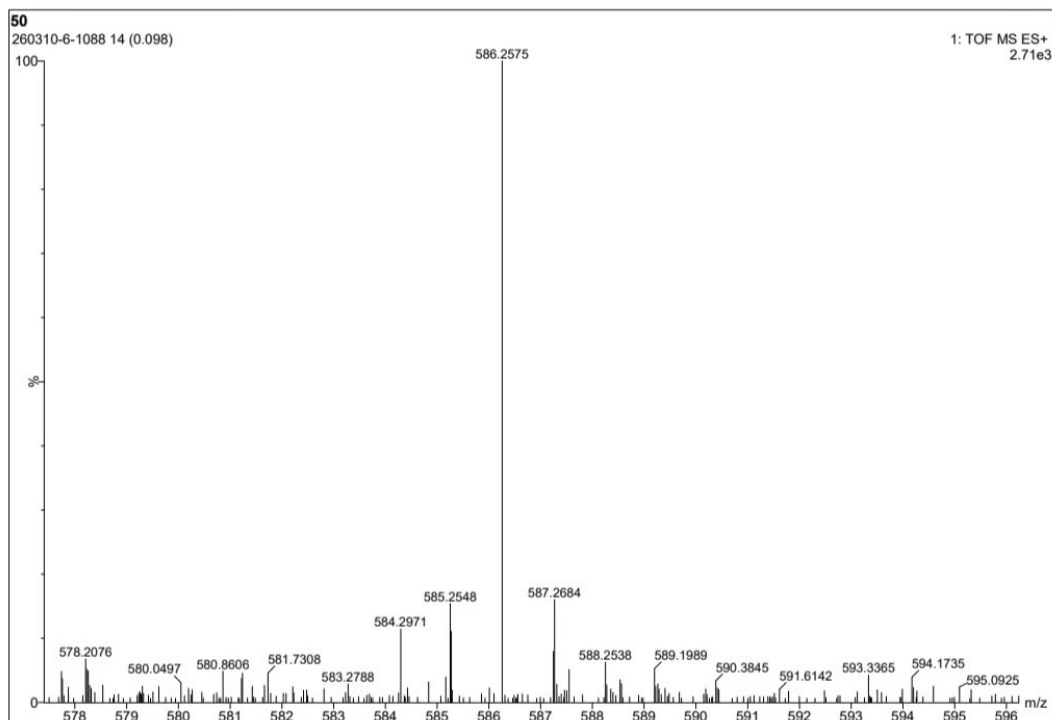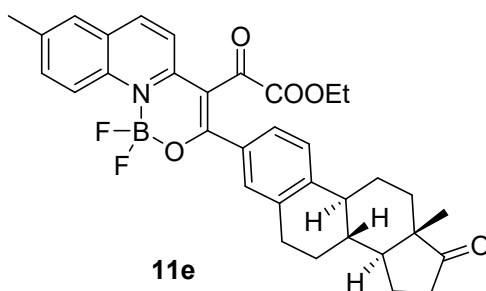

Chemical Formula:  $C_{34}H_{34}BF_2NO_5$

Exact Mass: 585.2498

Molecular Weight: 585.4548

m/z: 585.2498 (100.0%), 586.2532 (36.8%), 584.2534 (24.8%),

585.2568 (9.1%), 587.2565 (6.6%), 586.2602 (1.6%), 587.2541 (1.0%)

Elemental Analysis: C, 69.75; H, 5.85; B, 1.85; F, 6.49; N, 2.39; O, 13.66

HRMS (ESI, m/z) calcd for  $C_{34}H_{34}BF_2NO_5$   $[M+H]^+$  586.2571, found 586.2575.

## 10. UV-Vis absorption and Fluorescence emission spectra and Photophysical Measurements

Figure S1. UV-vis absorption spectra

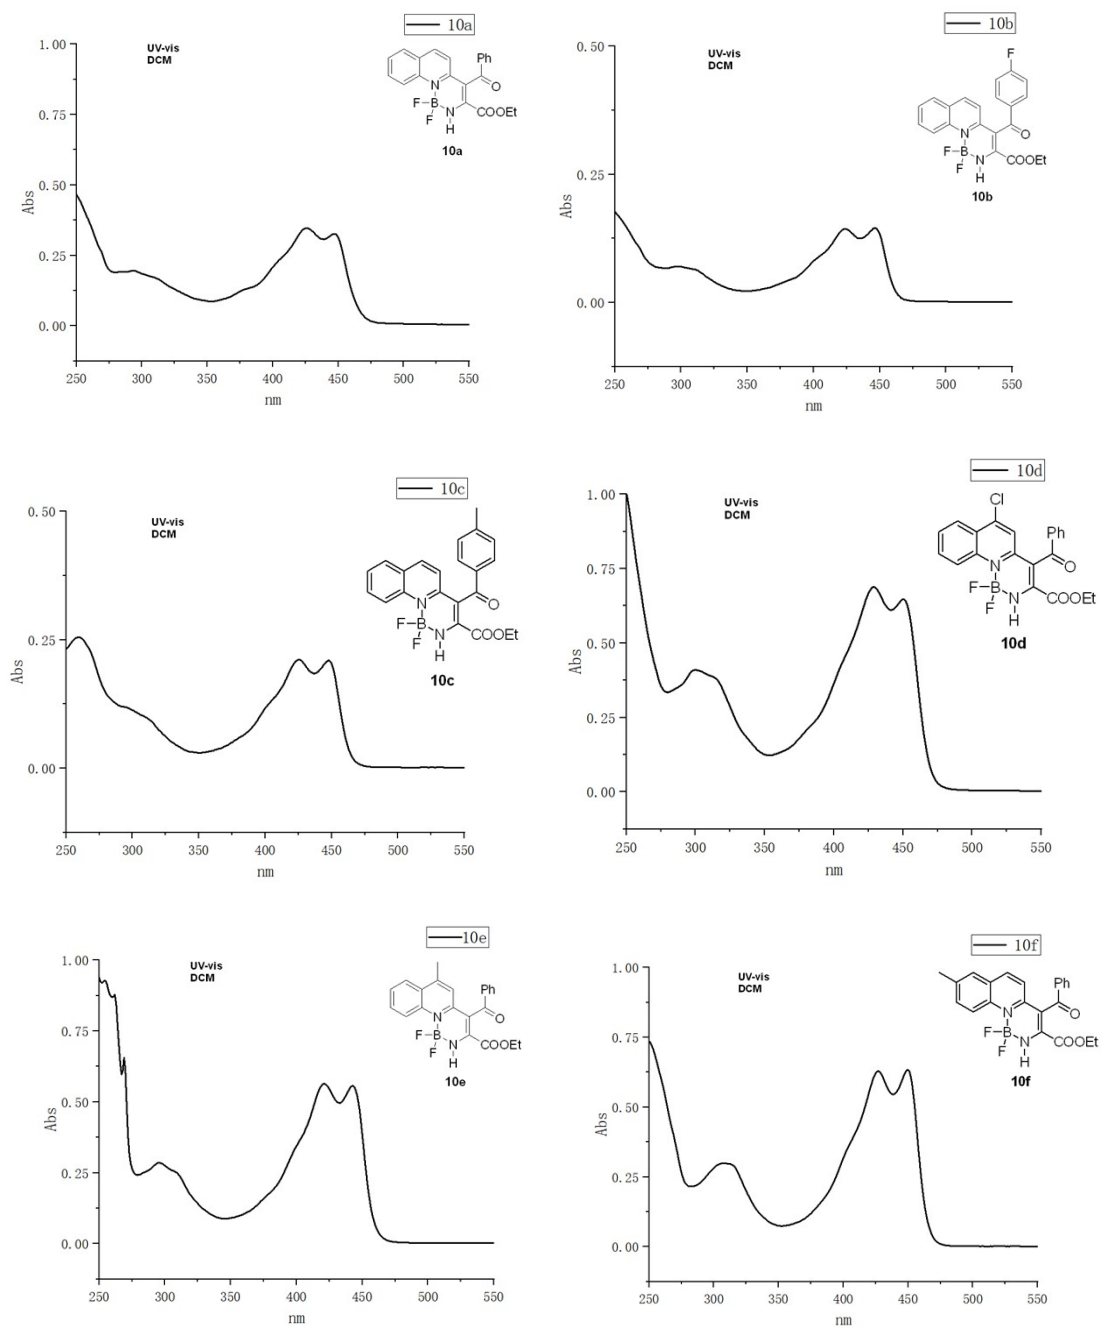

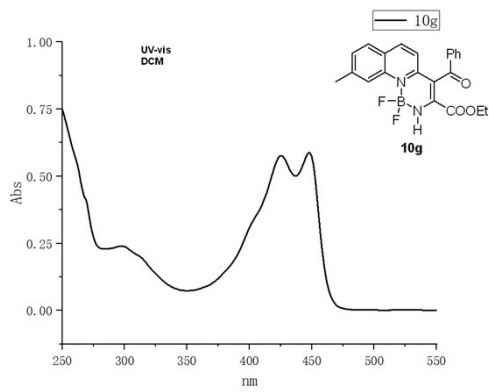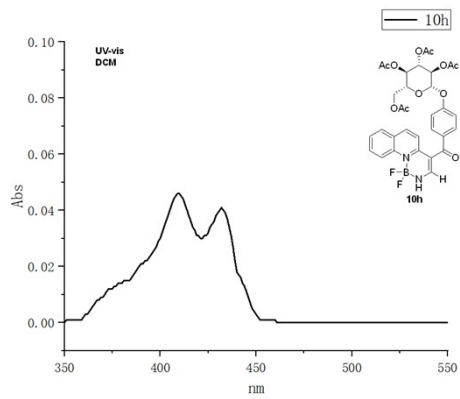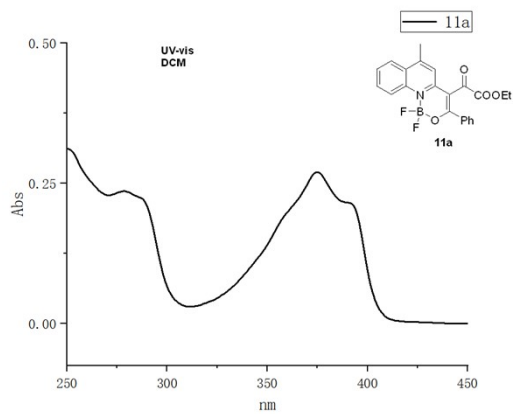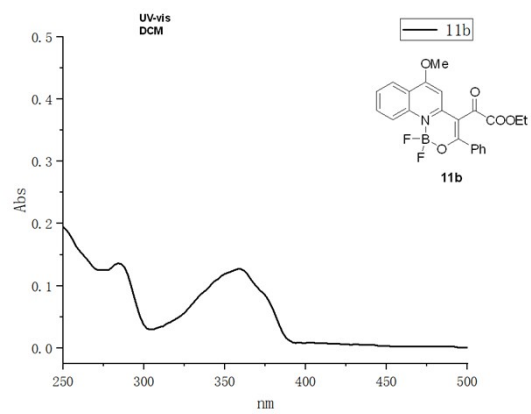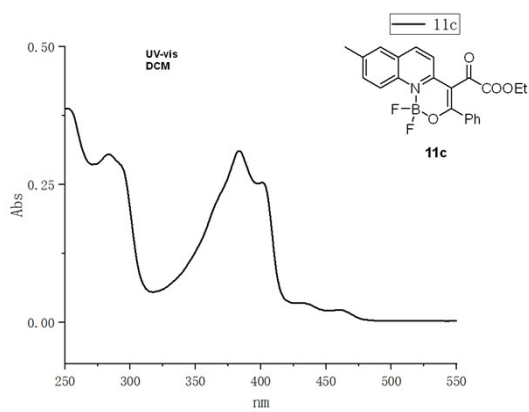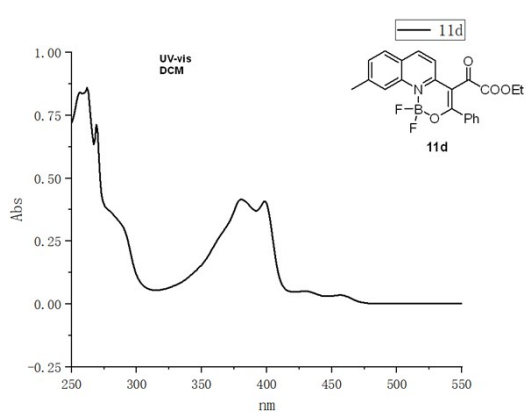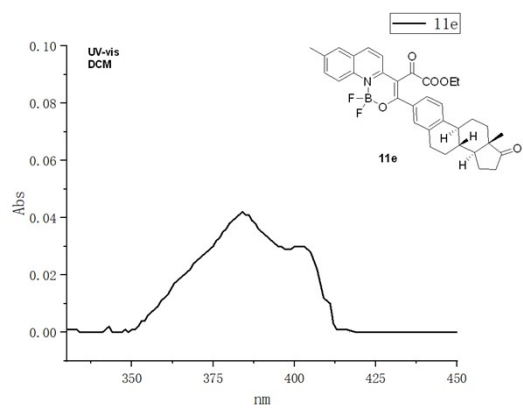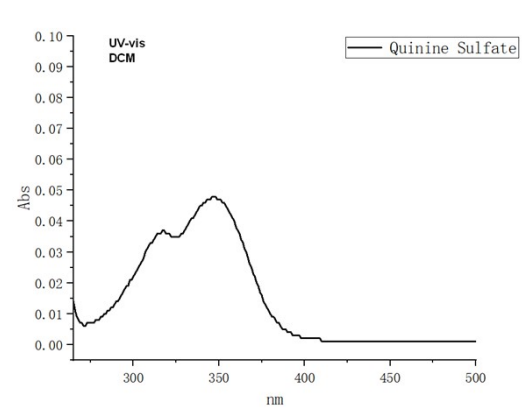

Figure S2. Fluorescence emission spectra [a]

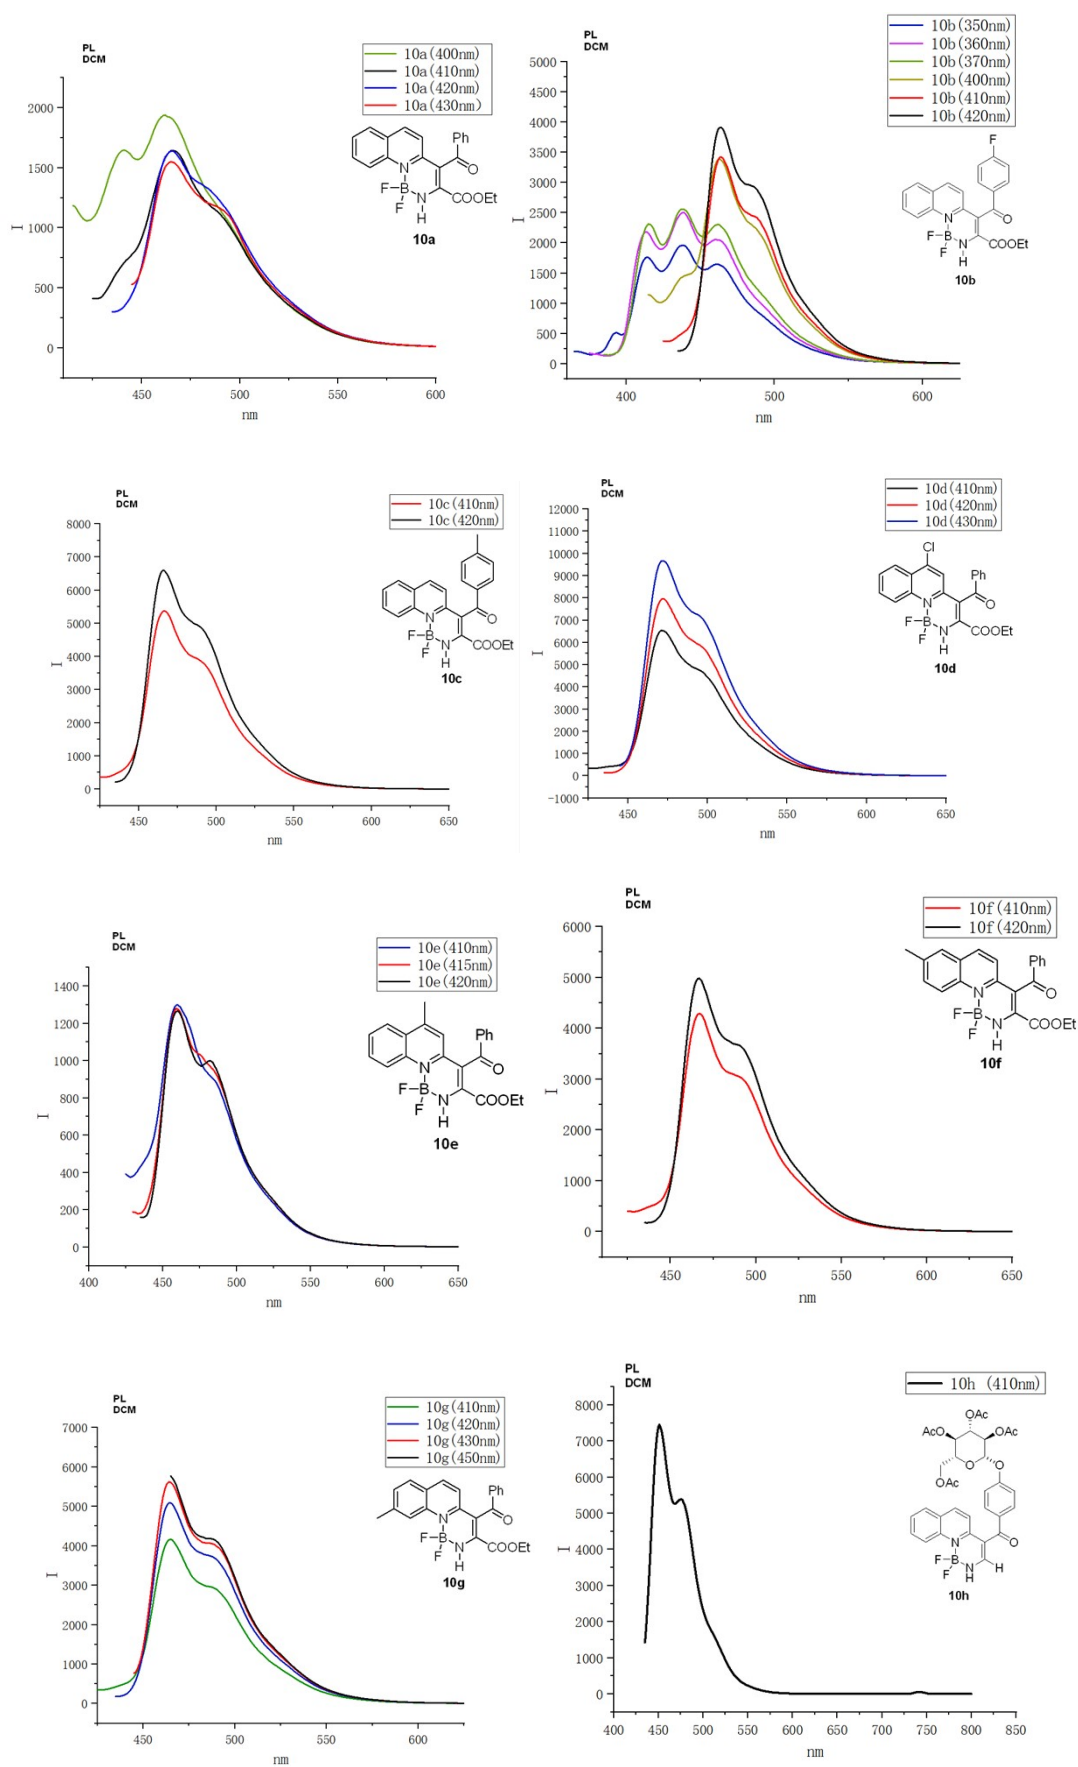

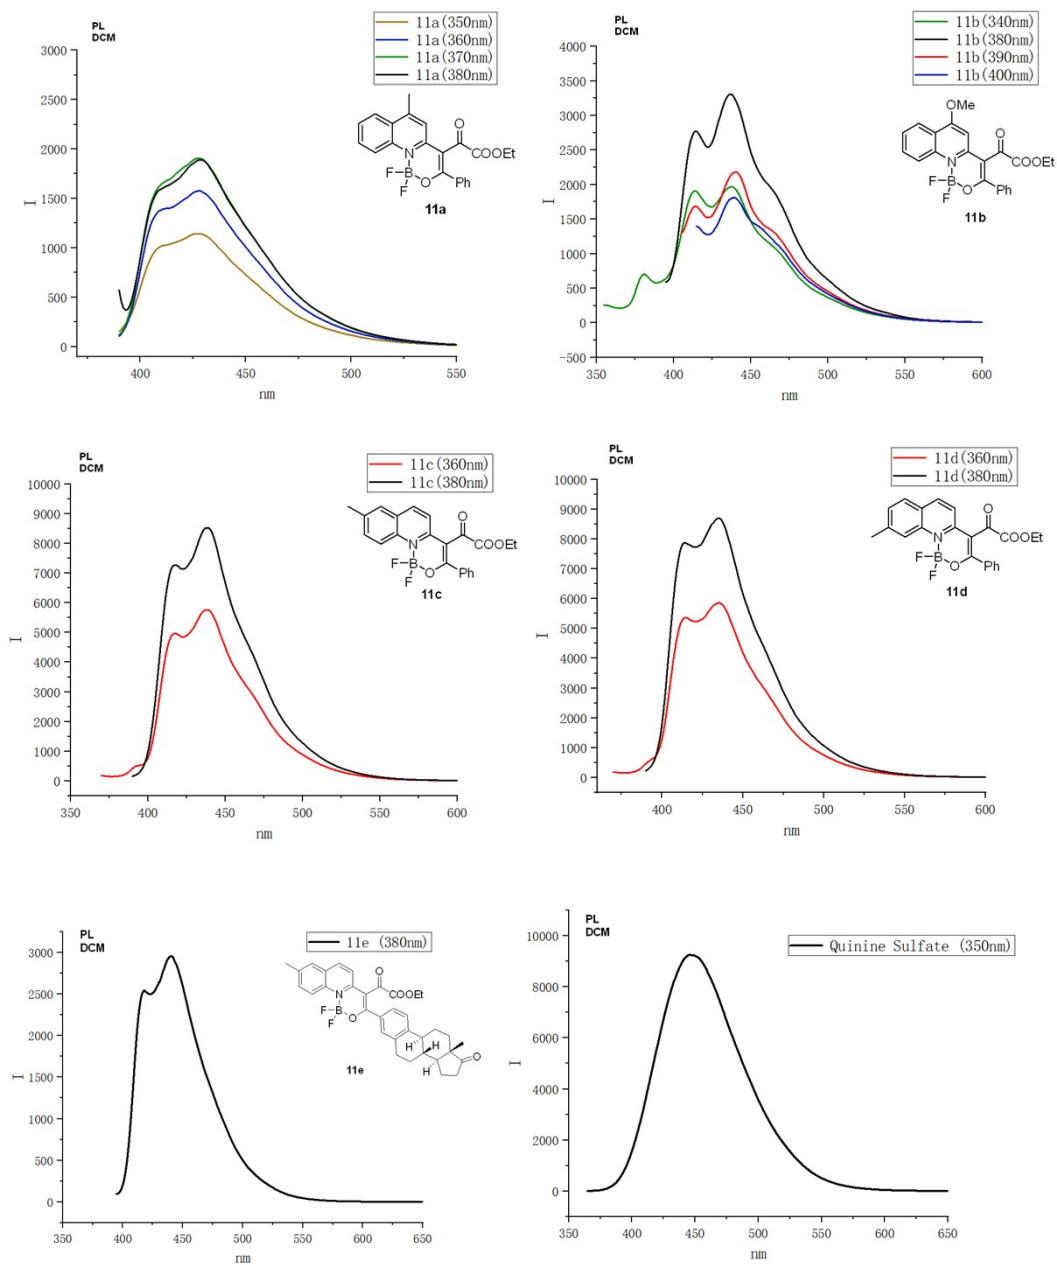

[a] Note: Values in parentheses represent the excitation wavelength ( $\lambda_{ex}$ , unit: nm).

UV–vis absorption spectra were recorded in DCM at 298 K using a 1 cm quartz cuvette. Fluorescence spectra were measured under the same conditions.

The molar extinction coefficient was calculated according to the following equation:

$$\varepsilon = A/(c \cdot l)$$

where A is the absorbance measured at the maximum absorption wavelength  $\lambda_{\text{abs}}$  (nm) for a solution with a known concentration c ( $\text{mol} \cdot \text{L}^{-1}$ ), using a 1 cm quartz cuvette.

The quantum yield was calculated according to the equation:

$$\phi_{\text{s}} = \phi_{\text{r}} \times \frac{A_{\text{r}}}{A_{\text{s}}} \times \frac{F_{\text{s}}}{F_{\text{r}}} \times \left( \frac{n_{\text{s}}}{n_{\text{r}}} \right)^2$$

Where A is the absorbance at the excitation wavelength (maintained below 0.05 to minimize inner filter effects), F is the integrated area under the corrected emission spectrum, and n is the refractive index of the solvent. Subscripts s and r refer to the sample and the reference standard, respectively. Quinine sulfate in 0.05 M  $\text{H}_2\text{SO}_4$  ( $\Phi_{\text{r}} = 0.546$ ) was used as the standard.

Table S3. Photophysical Data of Compounds 10 and 11 in DCM at 298 K

| Compound   | $\lambda_{\text{abs}}$ (nm) <sup>a</sup> | $\varepsilon_{\text{abs, max}}$<br>( $\text{L} \cdot \text{mol}^{-1} \cdot \text{cm}^{-1}$ ) <sup>b</sup> | $\lambda_{\text{em}}$ (nm) <sup>c</sup> | $\Phi_{\text{s}}$ <sup>d</sup> | Brightness<br>( $\text{L} \cdot \text{mol}^{-1} \cdot \text{cm}^{-1}$ ) <sup>e</sup> |
|------------|------------------------------------------|-----------------------------------------------------------------------------------------------------------|-----------------------------------------|--------------------------------|--------------------------------------------------------------------------------------|
| <b>10a</b> | 424                                      | 688                                                                                                       | 467                                     | 0.091                          | 62.61                                                                                |
| <b>10b</b> | 422                                      | 286                                                                                                       | 462                                     | 0.188                          | 53.77                                                                                |
| <b>10c</b> | 424                                      | 622                                                                                                       | 467                                     | 0.352                          | 218.94                                                                               |
| <b>10d</b> | 429                                      | 138                                                                                                       | 471                                     | 0.483                          | 66.46                                                                                |
| <b>10e</b> | 418                                      | 112                                                                                                       | 462                                     | 0.070                          | 7.87                                                                                 |
| <b>10f</b> | 426                                      | 1254                                                                                                      | 468                                     | 0.233                          | 292.18                                                                               |
| <b>10g</b> | 424                                      | 1146                                                                                                      | 465                                     | 0.266                          | 304.84                                                                               |
| <b>10h</b> | 410                                      | 9200                                                                                                      | 452                                     | 0.333                          | 3063.60                                                                              |
| <b>11a</b> | 374                                      | 532                                                                                                       | 428                                     | 0.106                          | 56.39                                                                                |
| <b>11b</b> | 360                                      | 254                                                                                                       | 440                                     | 0.198                          | 50.29                                                                                |
| <b>11c</b> | 382                                      | 622                                                                                                       | 439                                     | 0.469                          | 291.72                                                                               |
| <b>11d</b> | 381                                      | 826                                                                                                       | 436                                     | 0.516                          | 426.22                                                                               |
| <b>11e</b> | 380                                      | 840                                                                                                       | 441                                     | 0.050                          | 42.00                                                                                |

<sup>a</sup>Absorption maximum. <sup>b</sup>Molar absorption coefficients ( $\varepsilon$ ,  $\text{L} \cdot \text{mol}^{-1} \cdot \text{cm}^{-1}$ ) calculated at the absorption maximum.

<sup>c</sup>Fluorescence emission maxima. <sup>d</sup>Fluorescence quantum yield  $\Phi$  determined by a standard method using quinine sulfate in 0.05 M  $\text{H}_2\text{SO}_4$  ( $\Phi_{\text{r}} = 0.546$ ) as the reference. <sup>e</sup>Brightness =  $\varepsilon \times \Phi$ .

In dichloromethane, compounds **10h** and **11d** displayed the most favorable photophysical properties within their respective series. Compound **10h** exhibited an exceptionally high molar extinction coefficient ( $\varepsilon = 9200 \text{ L} \cdot \text{mol}^{-1} \cdot \text{cm}^{-1}$ ) and a

fluorescence quantum yield of 0.333 (relative to quinine sulfate in 0.05 M H<sub>2</sub>SO<sub>4</sub>,  $\Phi_r = 0.546$ ), granting it the highest brightness of 3063.60 L·mol<sup>-1</sup>·cm<sup>-1</sup> among all the synthesized compounds. Within the 11 series, compound **11d** showed the highest fluorescence quantum yield (0.516), accompanied by a molar extinction coefficient of  $\epsilon = 826 \text{ L}\cdot\text{mol}^{-1}\cdot\text{cm}^{-1}$  ( $\lambda_{\text{abs}} = 381 \text{ nm}$ ) and a brightness of 426.22 L·mol<sup>-1</sup>·cm<sup>-1</sup>.
